# Supplementary material
Source: PubMed Central journal article supplement (PMC3057111)
Supplement: NIHMS84943-supplement-01.pdf [file NIHMS84943-supplement-01.pdf]

## Supplemental Data

### Memory T Cell RNA Rearrangement Programmed

### by Heterogeneous Nuclear Ribonucleoprotein hnRNPLL

Zuopeng Wu, Xinying Jia, Laura de la Cruz, Xun-Cheng Su, Bruz Marzolf, Pamela Troisch, Daniel Zak, Adam Hamilton, Belinda Whittle, Di Yu, Daniel Sheahan, Edward Bertram, Alan Aderem, Gottfried Otting, Christopher C. Goodnow, and Gerard F. Hoynes

### Supplemental Notes on Group A Neural Spliced Genes

The following are notes on published references to Hnrpll-dependent exons that are alternatively spliced in the nervous system.

#### Mobp

Mol Cell Neurosci. 1999 Apr;13(4):229-36. Splicing pattern, transcript start distribution, and DNA sequence of the mouse gene (Mobp) encoding myelin-associated oligodendrocytic basic protein. McCallion AS, Stewart GJ, Montague P, Griffiths IR, Davies RW.

We have cloned the mouse gene *Mobp*, encoding the family of myelin-associated oligodendrocytic basic proteins (MOBP), to facilitate elucidation of its genomic organization and regulation. We report near complete sequence analysis of the *Mobp* gene (>11 kb), including complete sequence of all exons and their associated splice junctions. The *Mobp* gene comprises eight discrete exons and encompasses a genomic region in excess of 15 kb. We provide a definitive analysis of the alternative splicing events and exon usage required in the generation of the reported splice variants of *Mobp* transcripts. We identify sequences corresponding to the coding regions of all reported protein isoforms. Consequently, we demonstrate that sequence regions, predicted to encode unique portions of two putative protein isoforms in the rat (MOBP 71 and MOBP 99), are not fully conserved between the rat and the mouse: we predict that the mouse equivalents are two distinct polypeptides of 73 amino acids, MOBP73A and MOBP73B, respectively. We have analyzed sequence from 63 oligo-capped, cloned cDNA fragments and identify six transcription start points associated with the *Mobp* gene at postnatal day 26. This study provides the platform for a more detailed analysis of the function of the *Mobp* gene product and subsequent evaluation of its possible involvement in known neuropathies.

Myelin-associated oligodendrocytic basic protein (MOBP) is a newly recognized major CNS-specific myelin component, which is present throughout compact myelin. It has been suggested that MOBP may play a role in compacting or stabilizing the myelin sheath (Yamamoto *et al.*, 1994; Holz *et al.*, 1996; Montague *et al.*, 1997), possibly by binding the negatively charged acidic phospholipids of the cytoplasmic membrane.

Six splice variants have been identified which are predicted to encode five different protein isoforms of MOBP (Yamamoto *et al.*, 1994; Holz *et al.*, 1996). In the rat, these are predicted to be 69, 71, 81, 99, and 170 amino acids long, respectively, proline rich, and basic. Though all isoforms thus far identified (Yamamoto *et al.*, 1994; Holz *et al.*, 1996; Montague *et al.*, 1997) have amino acid residues 1–68 in common, they differ in the length and polarity of their respective C-terminal regions (Holz *et al.*, 1996; Montague

*et al.*, 1997). These protein isoforms are encoded by a single gene, *Mobp*. Six different mRNA splice variants have been reported based on cDNA sequence data (Yamamoto *et al.*, 1994; Holz *et al.*, 1996). There is clear evidence of differential developmental occurrence of mRNA splice variants: two reported splice variants, *Mobp* 81A and 81B (Holz *et al.*, 1996; Montague *et al.*, 1997), have the same protein coding region, but different 3'UTR sequences, and have been shown to localize to different parts of the oligodendrocyte (Montague *et al.*, 1998).

The 5'UTR of the *Mobp* transcript is provided by exons 1 and 2. Exons downstream of exons 1 and 2 have been named exons 3–8, corresponding to their linear order in the mouse genome. Amino acid residues 1–68, present in all previously reported MOBP isoforms (Yamamoto *et al.*, 1994; Holz *et al.*, 1996; Montague *et al.*, 1997), were found to be encoded by exon 3. The complex relationship between exons 4 and 8, the six splice variants of the *Mobp* transcript reported in rat and mouse, and the proteins that they encode (Yamamoto *et al.*, 1994; Holz *et al.*, 1996; Montague *et al.*, 1997), is illustrated in Fig. 3 and Tables 1 and 2. Transcript *Mobp* 69 is produced from exons 3, 5, and 7a/b. Transcript *Mobp* 170, the only transcript present at an embryonic time-point, is produced from exons 3 and 4. Exon 4 encodes the 102 amino acids unique to the protein isoform MOBP 170 (Montague *et al.*, 1997). MOBP 170 is also known as rOPRP1 (Yamamoto *et al.*, 1994).

*Glia*. 2005 Apr 1;50(1):80-5. Characterization of the murine splice variant *Mobp*155: developmental CNS expression pattern and subcellular localization of epitope-tagged protein. Montague P, McCallion AS, Barrie JE, Edgar JM, McLaughlin M, Davies RW, Griffiths IR.

Members of the myelin-associated oligodendrocytic basic protein (MOBP) family constitute the third most abundant protein in CNS myelin. Although MOBP localizes to the major dense line (MDL) of CNS myelin, the function of the individual isoforms is unknown. Alternative splicing of pre-*Mobp* mRNA gives rise to six characterized splice variants in both the mouse and the rat. These splice variants share a common N-terminal encoded in *Mobp* exon 3 comprising 68 amino acids. The predicted protein isoforms differ in their C-termini. Sequence analysis of intron 3 revealed the presence of a putative initiation codon followed by an open reading frame (ORF) encoding 53 amino acids that extends in frame into *Mobp* exon 4 yielding a predicted MOBP isoform comprising 155 amino acids, designated MOBP155. This newly characterized isoform possessing a novel N-terminus shares a common C-terminus with MOBP170. *Mobp*170 message is detectable at low abundance throughout myelinogenesis. In contrast, the novel splice variant encoding MOBP155 is expressed at modest levels late in CNS development, coincident with the expression of the abundant splice variant, *Mobp*81A. Immunostaining of Cos7 cells transiently expressing an epitope-tagged MOBP155 suggested that most of the product was translocated to mitochondria. Although *Mobp*155 and *Mobp*170 encode a common predicted C-terminus they have different expression profiles and their products are targeted to mitochondria and the nucleus, respectively, in transiently transfected Cos7 cells.

## Smn1: Survival motor neuron 1

A single gene in the mouse, duplicated in human to SMN1 and SMN2. SMN1 is deleted or mutated in Spinal Muscular Atrophy. SMN2 compensates poorly because it has a

single nucleotide substitution 6bp within exon 7 (exon 8 in the current assembly) that causes frequent silencing. This appears to be due to creating a better Exon Splicing Silencer sequence for binding and silencing by HnRNPA or G (Kashima... Manley JL 2007 Hum Mol Genetics 16, 3149-3159), although it may also be due to decreased activity of an exon splicing enhancer recognized by the SR protein SF2.

Variant splice products that skip exon 5 (exon 6 in the current assembly) are also present in human, and this exon corresponds to the enhanced exon in thunder T cells.

Role of Smn1 is in snRNP assembly and splicing factor processing and assembly in nuclear organelles (Gems).

Gennaralli et al 1995 (Biochem Biophys Res Comm 213, 342-348) demonstrated that approximately 15% of SMN1 transcripts exclude exon 5, as well as a similar proportion that exclude this exon and exon 7. This reduces the coiled domain and potential myristoylation sequences.

Cell, Vol. 80, 155-165, January 13, 1995 Identification and Characterization of a Spinal Muscular Atrophy-Determining Gene Suzie Lefebvre,\*r Lydie B/irglen,\*t Sophie Reboullet,\* Olivier Clermont\*, Philippe Burlet,\* Louis Viollet,\* Bernard Benichou,\* Corinne Cruaud,~ Philippe Millasseau,§ Massimo Zeviani,\*ll Denis Le Paslier,§ Jean Fr6zal,\* Daniel Cohen,§ Jean Weissenbach,~ Arnold Munnich,\* and Judith Melki\*

Spinal muscular atrophy (SMA) is a common fatal autosomal recessive disorder characterized by degeneration of lower motor neurons, leading to progressive paralysis with muscular atrophy. The gene for SMA has been mapped to chromosome 5q13, where large-scale deletions have been reported. We describe here the inverted duplication of a 500 kb element in normal chromosomes and narrow the critical region to 140 kb within the telomeric region. This interval contains a 20 kb gene encoding a novel protein of 294 amino acids. An highly homologous gene is present in the centromeric element of 95% of controls. The telomeric gene is either lacking or interrupted in 226 of 229 patients, and patients retaining this gene (3 of 229) carry either a point mutation (Y272C) or short deletions in the consensus splice sites of introns 6 and 7. These data suggest that this gene, termed the survival motor neuron (*SMN*) gene, is an SMA-determining gene.

To demonstrate that the *SMN* gene (*rBCD541*) is indeed a determining gene for SMA, we searched for mutations in the three SMA patients whose *SMN* gene showed no rearrangements. PCR amplification of exon 7 and its flanking regions revealed, in addition to the normal-sized PCR product, a smaller fragment in patient SA (Figure 5a). Direct sequence analysis of the smaller fragment showed a 7 bp deletion in the 3' splice acceptor site of *SMN* intron 6 (Figure 6). Sequence analysis of the normal-sized PCR product detected the sequence specific to the centromeric exon 7 but not that of the *SMN* exon 7 (data not shown). These results demonstrated that patient SA carried an intronic deletion of the *SMN* gene on one mutant allele and lacked the *SMN* exon 7 on the other mutant allele. This intronic deletion was inherited from the mother, and, in contrast with that of her affected child, the allelic fragment was specific to the *SMN* gene, confirming that the unaffected mother is, indeed, heterozygous for the mutation (data not shown). In patient BI, a 4 bp deletion was found in the 5' consensus splice donor site of *SMN* intron 7 (Figure 6). Sequence analysis of the nondeleted amplification product recognized the centromeric exon 7, but not the *SMN* exon 7, suggesting that the other mutant chromosome lacked the *SMN* exon 7 (data not shown). These two mutations were absent in 246 control individuals. Such mutations have been found in other genes

and typically abolish or disrupt splicing (Bottema et al., 1990; Murru et al., 1991). Finally, patient HU was heterozygous for a point mutation at codon 272 (TAT--\*TG'T), changing a tyrosine into a cysteine in the protein (Figure 6). This mutation was absent in 100 normal chromosomes, ruling out rare polymorphisms.

*Hum Mol Genet.* 2007 Dec 15;16(24):3149-59. hnRNP A1 functions with specificity in repression of SMN2 exon 7 splicing. Kashima T, Rao N, David CJ, Manley JL. Homozygous deletion or mutation of the survival of motor neuron 1 gene (SMN1) causes spinal muscular atrophy. SMN1 has been duplicated in humans to create SMN2, which produces a low level of functional SMN protein. However, most SMN2 transcripts lack exon 7, resulting in a non-functional protein. A single nucleotide difference near the 5' end of exon 7 largely accounts for SMN2 exon 7 skipping, an effect that has been attributed to loss of an exonic splicing enhancer (ESE) dependent on the SR protein splicing factor ASF/SF2 or to the creation of an exonic splicing silencer (ESS) element that functions by binding of the splicing repressor hnRNP A1. Our earlier experiments favored the latter mechanism and here we provide further evidence supporting the ESS model. We demonstrate that the striking effect of hnRNP A1 depletion on SMN2 exon 7 splicing is specific, as hnRNP A1 depletion has little or no effect on other inefficient splicing events tested, and ASF/SF2 depletion does not affect SMN1/2 splicing. By two different methods, we find a strong and specific interaction of hnRNPA1 with SMN2 exon 7 and only weak and equivalent interactions between ASF/SF2 and other SR proteins with the 5' ends of SMN1 and SMN2 exon 7. Finally, we describe two disease-related exon-skipping mutations that create hnRNP A1 binding sites, but show that splicing can be restored only modestly or not at all by hnRNP A1 depletion. Together our results provide strong support for the idea that SMN2 exon 7 splicing is repressed by an hnRNPA1-dependent ESS, but also indicate that creation of such elements is context-dependent.

*Trends Mol Med.* 2006 Mar;12(3):113-21. Spinal muscular atrophy: the RNP connection. Eggert C, Chari A, Laggerbauer B, Fischer U. Degenerated motor neurons in the spinal cord are the pathological hallmark of spinal muscular atrophy (SMA). SMA is caused by mutations in the ubiquitously expressed survival motor neuron 1 (SMN1) gene, which lead to reduced levels of functional SMN protein. Many different functions have been assigned to SMN, including assembly of ribonucleoproteins (RNPs), splicing, transcription and axonal mRNA transport. Recently, tissue from SMA patients and animal models has been used to determine which function of SMN is affected in SMA patients. A surprising picture has emerged: the impaired assembly of RNP subunits of the spliceosome seems to be responsible for SMA pathogenesis. Here, we present a model of how this defect might cause motor-neuron degeneration and consider potential therapies.

### Kinesin family 21a: KIF21a

Confirmed alternative splice events at 3' end of transcript (also in human in exons 29-31), at the junction between the segment encoding the stalk and the seven WD40 domains predicted to determine cargo specificity.

J Cell Biol. 1999 May 3;145(3):469-79. Novel dendritic kinesin sorting identified by different process targeting of two related kinesins: KIF21A and KIF21B. Marszalek JR, Weiner JA, Farlow SJ, Chun J, Goldstein LS.

Neurons use kinesin and dynein microtubule-dependent motor proteins to transport essential cellular components along axonal and dendritic microtubules. In a search for new kinesin-like proteins, we identified two neuronally enriched mouse kinesins that provide insight into a unique intracellular kinesin targeting mechanism in neurons. KIF21A and KIF21B share colinear amino acid similarity to each other, but not to any previously identified kinesins outside of the motor domain. Each protein also contains a domain of seven WD-40 repeats, which may be involved in binding to cargoes. Despite the amino acid sequence similarity between KIF21A and KIF21B, these proteins localize differently to dendrites and axons. KIF21A protein is localized throughout neurons, while KIF21B protein is highly enriched in dendrites. The plus end-directed motor activity of KIF21B and its enrichment in dendrites indicate that models suggesting that minus end-directed motor activity is sufficient for dendrite specific motor localization are inadequate. We suggest that a novel kinesin sorting mechanism is used by neurons to localize KIF21B protein to dendrites since its mRNA is restricted to the cell body.

From Nature Genetics FEOM paper: Nat Genet. 2003 Dec;35(4):318-21. Heterozygous mutations of the kinesin KIF21A in congenital fibrosis of the extraocular muscles type 1 (CFEOM1). Yamada K, Andrews C, Chan WM, McKeown CA, Magli A, de Berardinis T, Loewenstein A, Lazar M, O'Keefe M, Letson R, London A, Ruttum M, Matsumoto N, Saito N, Morris L, Del Monte M, Johnson RH, Uyama E, Houtman WA, de Vries B, Carlow TJ, Hart BL, Krawiecki N, Shoffner J, Vogel MC, Katowitz J, Goldstein SM, Levin AV, Sener EC, Ozturk BT, Akarsu AN, Brodsky MC, Hanisch F, Cruse RP, Zubcov AA, Robb RM, Roggenkämper P, Gottlob I, Kowal L, Battu R, Traboulsi EI, Franceschini P, Newlin A, Demer JL, Engle EC.

Congenital fibrosis of the extraocular muscles type 1 (CFEOM1; OMIM #135700) is an autosomal dominant strabismus disorder associated with defects of the oculomotor nerve. We show that individuals with CFEOM1 harbor heterozygous missense mutations in a kinesin motor protein encoded by KIF21A. We identified six different mutations in 44 of 45 probands. The primary mutational hotspots are in the stalk domain, highlighting an important new role for KIF21A and its stalk in the formation of the oculomotor axis. ...whose phenotypes map to *FEOM1* for mutations in transcripts from this region. After excluding several candidates, we examined two adjacent partial transcripts, *FLJ20052* and *KIAA1708*, that share similarity to mouse *Kif21a6*. Combining database sequence with that generated from human fetal brain cDNA by RT-PCR, we determined the cDNA and genomic organization of human *KIF21A*. The *KIF21A* open reading frame is 5,022 bp in length, comprises 38 exons with alternative splicing of exon 12 and exons 29–31, encompasses a genomic region of ~150 kb and is predicted to encode a protein of 1,674 amino acids. Kinesins and dyneins are molecular motors responsible for microtubule-dependent transport of cargo; in neurons, they are responsible for anterograde and retrograde axonal transport, respectively. KIF21A, KIF21B and KIF4 comprise one of the 14 classes of human kinesins<sup>9</sup>, and their predicted structures are similar to that of classical kinesin, with an N-terminal motor domain that interacts with the microtubule track, a central coiled-coil stalk and a C-terminal tail that interacts with the transported cargo. Mouse *Kif21a* was found to be enriched in adult neural tissues<sup>6</sup>. Notably, *Kif4* transports membranous organelles containing L1, a cell adhesion molecule important to axonal formation and extension in young neurons<sup>10</sup>.

## Glutamate receptor interacting protein 1: GRIP1

Confirmed two alternative promoters and first exons, Grip1a and Grip1b, conferring different N-terminal sequences with 2 and one Cysteine respectively. Only Grip1b appears to be palmitoylated. This is the start that is enhanced in thunder T cells.

Grip1 interacts also with Ephrin-B2.

Maya Yamazaki, Masahiro Fukaya, Manabu Abe, Kanju Ikeno, Toshikazu Kakizaki, Masahiko Watanabe, Kenji Sakimura, c,\* (2001) Differential palmitoylation of two mouse glutamate receptor interacting protein 1 forms with different N-terminal sequences. *Neuroscience Letters* 304:81-84

Glutamate receptor interacting protein (GRIP) is a member of the PDZ domain-containing protein family that is localized in the postsynaptic density area. This protein has been reported to interact specifically with the C-termini of AMPA-selective glutamate receptor channel subunits, GluRa2 and GluRa3 through its PDZ domains. To clarify the physiological functions of GRIP, we cloned mouse GRIP1, and found that there are three sites for alternative splicing and two putative translational start codons by characterizing GRIP1 cDNA clones and reverse transcription-polymerase chain reaction products. Metabolic labeling of COS-7 cells expressing two N-terminal GRIP1 proteins demonstrated that these proteins differed in their pattern of palmitoylation. These findings suggested that the molecular diversity of GRIP1 underlies the localization and functional heterogeneity of this protein.

Glutamate receptor channels mediate most of the fast excitatory synaptic transmission in the central nervous system. At excitatory synapses, ionotropic glutamate receptors such as  $\alpha$ -amino-3-hydroxy-5-methyl-4-isoxazole propionic acid (AMPA)/kainate type and N-methyl-D-aspartate (NMDA) type are highly concentrated in the postsynaptic density (PSD). It has recently been proposed that protein-protein interactions of some cytosolic proteins with the C-termini of glutamate receptor subunits are involved in anchoring/clustering receptors at the PSD and coupling the receptors to cytoplasmic signaling molecules. The most common type of such interactions is mediated between PDZ domains of a binding protein and a short amino acid motif at the carboxyl end of the receptor. AMPA receptor subunits GluRa2 (GluR2) and GluRa3 (GluR3) (C-terminal sequence-ESVKI) bind specifically to PDZ proteins such as glutamate receptor interacting protein (GRIP) [5], AMPA receptor-binding protein (ABP) [15], and a protein interacting with C kinase 1 (PICK1) [4,19]. ABP resembles GRIP in its primary sequence and has been reported to be a shorter splice variant of ABP-L/GRIP2 [2,6,18]. Moreover, many of the scaffold proteins in synapses such as the PSD-95/SAP90 family have been reported to have alternative splicing variants [1,9,10,13,14]. The molecular diversity of these proteins may play important roles in synaptic targeting or signal transduction [1,9,10,13,14].

Erik I. Charych, Rongwen Li, David R. Serwanski, Xuejing Li, Celia P. Miralles, Noelia Pinal and Angel L. De Blas. Identification and characterization of two novel splice forms of GRIP1 in the rat brain. *Journal of Neurochemistry*, 2006, 97, 884–898.

The glutamate receptor interacting protein (GRIP) family comprises highly homologous multiple PDZ domain-containing proteins that are encoded by the GRIP1 (Dong et al. 1997, 1999) and GRIP2 (Bruckner et al. 1999; Dong et al. 1999; Wyszynski et al. 1999) genes. GRIP1 was originally reported as a 1112 amino acid polypeptide containing 7 PDZ domains (Dong et al. 1997). GRIP1 seems to play a role in the targeting and postsynaptic

localization of AMPA receptors (Bruckner et al. 1999; Dong et al. 1999; Li et al. 1999; Osten et al. 2000; Song and Huganir 2002) and in the activity-dependent synaptic reorganization of AMPA receptors during long term depression (Song and Huganir 2002; Brecht and Nicoll 2003). GRIP<sup>-/-</sup> mouse mutants have shown that GRIP1 is required for normal cell-matrix interactions during embryonic development (Bladt et al. 2002; Takamiya et al. 2004). GRIP1 also plays an important role in dendrite morphogenesis (Hoogenraad et al. 2005), and we have recently reported that GRIP1 is present at GABAergic synapses and in the intact brain (Charych et al. 2004a; Li et al. 2005a). In addition, GRIP1 has been shown to interact with the GABAAR interacting protein GABARAP via PDZ domains 4–6 (Kittler et al. 2004). GRIP1 exhibits a high degree of molecular heterogeneity resulting from alternative splicing (Fig. 1). Alternate 18 and 19 amino acid N-terminal peptides were shown in mouse to give rise to GRIP1a and GRIP1b, respectively, such that GRIP1b can be palmitoylated and GRIP1a cannot (Yamazaki et al. 2001). Consequently, GRIP1b is associated with membranes whereas GRIP1a is localized to the cytoplasm (Yamazaki et al. 2001). Alternative splicing of GRIP1 also gives rise to a 90 kDa short form of GRIP1, called DIP2 (DLX

### Intersectin 1: Itsn1

Genomics. 1998 Nov 1;53(3):369-76. Two isoforms of a human intersectin (ITSN) protein are produced by brain-specific alternative splicing in a stop codon. Guipponi M, Scott HS, Chen H, Schebesta A, Rossier C, Antonarakis SE.

Using selected trapped exons with homology to specific protein domains, we identified a new full-length cDNA encoding a protein containing many motifs for protein-protein interactions. There are two major mRNA transcripts, a ubiquitously expressed mRNA of 5.3 kb and a brain-specific transcript of approximately 15 kb, encoding proteins of 1220 and 1721 amino acids, respectively. The stop codon of the ORF of the shorter transcript is split between adjacent exons. In brain tissues the last exon of the short transcript is skipped, and an alternative downstream exon, the first of several additional, is used to produce the 15-kb mRNA. The putative human protein is highly homologous to *Xenopus* intersectin (81% identical) and to *Drosophila* dynamin-associated protein, Dap160 (31% identical) and was termed intersectin (ITSN). Both human proteins contain five SH3 (Src homology 3) domains, two EH (Eps15 homology) domains, and an alpha-helix-forming region. The brain-specific long transcript encodes for three additional domains: a GEF (guanine-nucleotide exchange factors), a PH (pleckstrin homology), and a C2 domain. The *Drosophila* homologue is associated with dynamin, a protein family involved in the endocytic pathway and/or synaptic vesicle recycling. The structure of the human ITSN protein is consistent with its involvement in membrane-associated molecular trafficking and signal transduction pathways. The human ITSN gene has been mapped to 21q22.1-q22.2 between markers D21S319 and D21S65, and its importance in Down syndrome and monogenic disorders is currently unknown.

J Biol Chem. 1999 May 28;274(22):15671-7. Splice variants of intersectin are components of the endocytic machinery in neurons and nonneuronal cells. Hussain NK, Yamabhai M, Ramjaun AR, Guy AM, Baranes D, O'Bryan JP, Der CJ, Kay BK, McPherson PS.

We recently identified and cloned intersectin, a protein containing two Eps15 homology (EH) domains and five Src homology 3 (SH3) domains. Using a newly developed intersectin antibody, we demonstrate that endogenous COS-7 cell intersectin localizes to

clathrin-coated pits, and transfection studies suggest that the EH domains may direct this localization. Through alternative splicing in a stop codon, a long form of intersectin is generated with a C-terminal extension containing Dbl homology (DH), pleckstrin homology (PH), and C2 domains. Western blots reveal that the long form of intersectin is expressed specifically in neurons, whereas the short isoform is expressed at lower levels in glia and other nonneuronal cells. Immunofluorescence analysis of cultured hippocampal neurons reveals that intersectin is found at the plasma membrane where it is co-localized with clathrin. Ibp2, a protein identified based on its interactions with the EH domains of intersectin, binds to clathrin through the N terminus of the heavy chain, suggesting a mechanism for the localization of intersectin at clathrin-coated pits. Ibp2 also binds to the clathrin adaptor AP2, and antibodies against intersectin co-immunoprecipitate clathrin, AP2, and dynamin from brain extracts. These data suggest that the long and short forms of intersectin are components of the endocytic machinery in neurons and nonneuronal cells.

From: *Genomics*. 2004 Jul;84(1):106-13. Alternative splicing of mammalian Intersectin 1: domain associations and tissue specificities. Tsyba L, Skrypkina I, Rynditch A, Nikolaienko O, Ferenets G, Fortna A, Gardiner K.

The Intersectin 1 (ITSN1) protein functions in clathrin-mediated endocytosis and in MAP kinase signaling. The complex domain structure comprises two EH and five SH3 domains in the short isoform, plus RhoGEF, pleckstrin, and putative calcium-interaction domains in the long isoform. Alternative splicing of exon 20, affecting the SH3A domain, has been shown in rat and that of exons 25 + 26, affecting the SH3C domain, has been shown in human and rat. Here we report 7 novel splice variants of the human and mouse ITSN1 genes and demonstrate conservation of alternative splicing affecting SH3A and SH3C in mouse. The novel variants encode transcripts with altered EH domain spacing and RhoGEF domain structure and possible targets of nonsense-mediated decay. Eight and 16 protein variants of the short and long ITSN1 isoforms, respectively, are predicted. These isoforms likely serve to modulate the many complex protein interactions and functions of ITSN1.

Intersectin 1 (ITSN1) is an evolutionarily conserved, multidomain protein that functions in clathrin-associated endocytosis and as a mediator in MAPK signaling pathways [1]. The major ITSN1 transcripts described in mammals are the short form, ITSN1-s, which is ubiquitously expressed, and the long form, ITSN1-l, which shows neuron-specific expression [2 and 3]. Both short and long forms of ITSN1 contain two Esp15 homology domains (EH1 and EH2) near the amino-terminus, followed by a coiled-coil domain enriched in lysine, leucine, glutamate, arginine, and glutamine (the KLERQ region) and five Src-homology 3 (SH3) domains (SH3A, B, C, D, and E). ITSN1-l contains a carboxy-terminal extension with a Dbl-homology (DH), or RhoGEF, domain, a pleckstrin homology (PH) domain, and a putative calcium-dependent (C2) interaction domain. A number of functions have been demonstrated for ITSN1 and several are modulated by or involve multiple domains of the protein. For example, expression in tissue culture cells of a cDNA containing the two EH domains activates the transcription factor Elk, but the level of this activation is lessened if the cDNA construct also encodes the KLERQ and SH3 domains, i.e., the complete ITSN1-s form [4]. The DH domain has guanine nucleotide exchange activity for Cdc42 [5]. cDNA constructs encoding only the DH or the DH + PH domains have greater activity than the complete ITSN1-l form, implying modulation by the EH, KLERQ, or SH3 domains. In addition, ITSN1-l activity for Cdc42 is enhanced by binding of N-WASP (neuronal Wiskott–Aldrich syndrome protein) to the



SH3 domains; binding efficiency is variable among domains with SH3A > E > C [5]. The ITSN1 SH3A, B, and D domains also bind CdGAP, a GTPase-activating protein that functions to inhibit Rac and Cdc42. Binding to ITSN1 inhibits CdGAP activity [6], thereby possibly increasing Cdc42 activity. The ITSN1 SH3A domain competes with Grb2 for binding to SOS (Son-of-Sevenless), a guanine nucleotide exchange factor for Ras. Overexpression of cDNA constructs encoding ITSN1 SH3 domains blocks Ras activation [7 and 8]. Additional ITSN1 protein interactions include several endocytosis-related proteins binding to the EH domains, SNAP25 (a protein involved in exocytosis) binding to the KLERQ region, the endocytosis protein dynamin and the phosphoinositol phosphatase synaptojanin binding to subsets of the SH3 domains, and phosphoinositol phosphates binding to the PH domain [9, 10, 11 and 12].

Using primers designed to amplify across exon 6 of the mouse *Itsn* cDNA, RT-PCR of mRNA from adult mouse tissues generated two products: a predominant band at 604 bp corresponding to the published *Itsn* messages and a second band at 493 bp (Fig. 2A). Cloning and sequencing of the novel PCR product from lung identified a deletion of 111 bp that truncated exon 6 without altering the open reading frame. This transcript, termed isoform 4, was detected in all mouse tissues tested; expression levels are relatively low, requiring hybridization for visualization. A human transcript corresponding to isoform 4 is detected in human fetal tissues (Fig. 2B) and is also found as a NEDO cDNA obtained from placenta (Accession No. AK027846).

Comparison of human and mouse genomic DNA with ITSN1 exon 6 sequence revealed that deletion of the 111 nucleotides reflects the use of a consensus splice site internal to exon 6, creating a new 5' end. This truncation deletes 37 amino acids between the EH1 and the EH2 domains, decreasing the interdomain spacing from 105 amino acids to 68.

RT-PCR analysis of mouse *Itsn* using primers within exons 5 and 16 identified a product lacking exons 6–14 (isoform 3) (Fig. 2C), which encode the second EH domain and the part of the coiled-coil KLERQ region. This event shifts the open reading frame and introduces a stop codon truncating the protein at amino acid 133, after inclusion of an additional 15 residues (SANAWKTYSRETDTQ). This transcript is seen at low levels in brain, liver, and lung.

From: *Biochim Biophys Acta*. 2001 Oct 31;1521(1-3):1-11. The human intersectin genes and their spliced variants are differentially expressed. Pucharcos C, Casas C, Nadal M, Estivill X, de la Luna S.

Human intersectins (ITSN1 and ITSN2) are members of a conserved family of proteins involved in clathrin-mediated endocytosis. A short and a long isoform with different protein domain compositions have been described for both human intersectins. Here, we have resolved the exon/intron structure of the ITSN2 gene to explain the genomic origin of its alternatively spliced transcripts. Comparison of the two ITSN human genes shows a high level of conservation in their genomic organization, including the main alternative splicing events. An extensive tissue expression analysis of the two predominant transcripts as well as other minor variants shows that ITSN expression is under tissue and developmental controls. Their differential expression is made more evident when the expression of both intersectins is studied by *in situ* hybridization in mouse brain.

Clathrin-mediated endocytosis at the plasma membrane of eukaryotic cells is a specialized mechanism involved in the traffic of nutrients and receptor–ligand complexes

in all the cells. In neurons, this process also plays an essential role in the recycling of synaptic vesicles. Up to now, more than 20 proteins have been identified to participate in the molecular machinery of clathrin-mediated endocytosis (reviewed in [1, 2, 3 and 4]). These molecules interact among themselves through a limited set of protein domains to form intricate macromolecular complexes. The uptake process begins with the recruitment of the heterotetramer adapter protein 2 (AP-2) to the plasma membrane that drives the assembly of clathrin to the nascent coat pit. AP-2 binds to accessory proteins including Eps15 [5 and 6], epsin [7], amphiphysin heterodimers [8 and 9], auxilin [10] and AP180 [11], promoting the growth of clathrin-coated vesicles (CCVs). Lipid-modifying enzymes such as endophilins [12] and the phosphatase synaptojanin [13] are also involved in vesicle formation. Finally, it is thought that CCV fission is mediated by dynamin, although the molecular mechanism is still a matter of controversy [14 and 15]. Dynamin interacts with several SH3 (Src 3 homology) domain-containing proteins including amphiphysin I and II, endophilin, syndapin/PACSIN and intersectin (reviewed in [1 and 16. S.L. Schmid, M.A. McNiven and P. De Camilli. *Curr. Opin. Cell Biol.* 10 (1998), pp. 504–512.

Intersectin 1 is a protein involved in clathrin-mediated endocytosis which has been identified in humans [17 and 18], rat (named ESH1 [19]), mouse (named Esi1 [20]), *Xenopus laevis* [21] and *Drosophila melanogaster* (named Dap160 [22]). In humans, intersectin 1 exists as two main isoforms, a short one composed of two EH (Eps15 homology) domains, a central coiled-coil region and five consecutive SH3 domains, and a long isoform with an extended carboxy-end region composed of a DH (Dbl homology), a PH (pleckstrin homology) and a C2 domain [17 and 18]. Intersectin has been proposed as a scaffolding protein due to its ability to bind several endocytic-related proteins. Thus, the EH domains bind epsins [20 and 21] and SCAMP1 [23], the coiled-coil region interacts with the central region of Eps15 and Eps15R [20], and with the exocytosis-related proteins SNAP23 and SNAP25 [19], and the SH3 domains interact with dynamin [19, 20 and 21] and synaptojanin [19 and 21]. Recently, intersectin 1 has been involved in signal transduction pathways since one of its SH3 domains has the ability to interact with the Ras exchange factor mSos1 [24], and it can regulate mitogenic signalling pathways [25 and 26], providing a link between endocytosis and cell signalling.

Intersectin 1 is highly similar to intersectin 2, described so far in humans and mouse [20 and 27]. Intersectin 2 has two main isoforms produced by alternative splicing giving a short and a long isoform with the same multimodular structure as intersectin 1. Both intersectin 1 and 2 show a subcellular distribution similar to other components of the endocytic machinery, and their overexpression blocks endocytosis [27]. Here we report the genomic organization of *ITSN2*, the characterization of some spliced variants of intersectin 1 and 2, their expression profiles and an extensive comparative expression study of both genes, including in situ hybridization analysis of mouse brains.

Ptprt = PTPRrho = LOC666183

BMC Genomics. 2004 Feb 11;5(1):14. Genomic structure and alternative splicing of murine R2B receptor protein tyrosine phosphatases (PTP $\kappa$ ,  $\mu$ ,  $\rho$  and PCP-2). Besco J, Popesco MC, Davuluri RV, Frosthalm A, Rotter A. BACKGROUND: Four genes designated as PTPRK (PTP $\kappa$ ), PTPRL/U (PCP-2), PTPRM (PTP $\mu$ ) and PTPRT (PTP $\rho$ ) code for a subfamily (type R2B) of receptor protein tyrosine phosphatases (RPTPs) uniquely characterized by the presence of an N-

terminal MAM domain. These transmembrane molecules have been implicated in homophilic cell adhesion. In the human, the PTPRK gene is located on chromosome 6, PTPRL/U on 1, PTPRM on 18 and PTPRT on 20. In the mouse, the four genes *ptprk*, *ptprl*, *ptprm* and *ptprt* are located in syntenic regions of chromosomes 10, 4, 17 and 2, respectively. RESULTS: The genomic organization of murine R2B RPTP genes is described. The four genes varied greatly in size ranging from approximately 64 kb to approximately 1 Mb, primarily due to proportional differences in intron lengths. Although there were also minor variations in exon length, the number of exons and the phases of exon/intron junctions were highly conserved. In situ hybridization with digoxigenin-labeled cRNA probes was used to localize each of the four R2B transcripts to specific cell types within the murine central nervous system. Phylogenetic analysis of complete sequences indicated that PTPrho and PTPmu were most closely related, followed by PTPkappa. The most distant family member was PCP-2. Alignment of RPTP polypeptide sequences predicted putative alternatively spliced exons. PCR experiments revealed that five of these exons were alternatively spliced, and that each of the four phosphatases incorporated them differently. The greatest variability in genomic organization and the majority of alternatively spliced exons were observed in the juxtamembrane domain, a region critical for the regulation of signal transduction. CONCLUSIONS: Comparison of the four R2B RPTP genes revealed virtually identical principles of genomic organization, despite great disparities in gene size due to variations in intron length. Although subtle differences in exon length were also observed, it is likely that functional differences among these genes arise from the specific combinations of exons generated by alternative splicing.

Common to all Type 2 RPTPs is an extracellular segment containing a combination of multiple fibronectin and immunoglobulin (Ig)-like domains, and a single transmembrane region. The intracellular region contains a membrane proximal juxtamembrane domain, followed by a catalytically active tyrosine phosphatase domain and a second inactive domain. Type 2 RPTPs have been further subdivided into two distinct classes (R2A and R2B). Genes in the R2B class are differentiated from the R2A class by an additional MAM (Meprin/ A5/PTP mu) domain at the N-terminus [5]. In addition to a putative role in signal transduction, R2B molecules have cell adhesive properties [6]. The four murine R2B genes (*ptprk*/PTPK, *ptprl*/PCP-2, *ptprm*/PTP $\mu$ , and *ptprt*/PTP $\rho$ ) are located on mouse chromosomes 10, 4, 17, and 2, respectively.

Three major regions were delineated, each with varying degrees of sequence identity: Exons 2–13 comprised the extracellular segment (MAM, Ig and four fibronectin (FN) type III domains), exon 14–18 (juxtamembrane region), and exons 19–32 (two phosphatase domains).

PCR experiments showed that five of the eight tested exons (14, 16, 17a, 20a, and 22a) were alternatively spliced. Exons 7 and 8 were present and exon 28a was absent in all R2B transcripts tested. All but one of the alternatively spliced exons (14) was located in the R2B intracellular segment. Exon 14 preceded the transmembrane region; exons 16 and 17a encoded intracellular juxtamembrane sequences, and the last two exons (20a, and 22a) encoded portions of the catalytically active, first phosphatase domain.

Each of the four R2B genes expressed in the brain used the five alternatively spliced exons in a different combination: In PTP $\rho$  transcripts, exon 17a and 20a were absent, and exons 14, 16, and 22a were alternatively spliced (Figure 11). In PTP $\mu$  transcripts, exons 14, 16, 20a and 22a were absent; exon 17a was present and not alternatively spliced. The alternative use of two 5' splice consensus sites resulted in the transcription of an

additional 58 bp of the intron between exons 13 and 15 (Figure 12). In PTP $\kappa$  mRNA, exons 14 and 22a were absent, and exons 16, 17a and 20a were alternatively spliced (Figure 13).

The high frequency of alternatively spliced exons in the R2B juxtamembrane segment suggests that the region has highly specialized functions. The importance of alternatively spliced exons has been well documented for the closely related Type 2 RPTP, LAR, in which a small (27 bp) alternatively spliced exon (LASE-c) was identified in the fifth FN-III domain [31]. Subsequently, a 33 bp exon (LASE-a), was identified in the intracellular juxtamembrane region [32]. LASE-a, which was shown to be brain specific and developmentally regulated, was present in cell bodies of cultured granule cells, but was absent in neurites. Conversely, the LASE-c isoform was absent in cell bodies and present in neurites. Using in vitro ligand binding assays, the laminin-nidogen extracellular matrix complex was identified as a ligand for LAR, specifically interacting with the fifth FN-III domain [33]. When LAR bound the laminin-nidogen complex, cells formed long processes. Inclusion of the alternatively spliced 27 bp LASE-c exon disrupted this binding, causing changes in cell morphology. These studies imply a role for alternatively spliced exons in neurite extension through modification of cell adhesion.

BMC Genomics. 2001;2(1):1. Genomic organization and alternative splicing of the human and mouse RPTPrho genes. Besco JA, Frostholm A, Popesco MC, Burghes AH, Rotter A.

**BACKGROUND:** Receptor protein tyrosine phosphatase rho (RPTPrho, gene symbol PTPRT) is a member of the type IIB RPTP family. These transmembrane molecules have been linked to signal transduction, cell adhesion and neurite extension. The extracellular segment contains MAM, Ig-like and fibronectin type III domains, and the intracellular segment contains two phosphatase domains. The human RPTPrho gene is located on chromosome 20q12-13.1, and the mouse gene is located on a syntenic region of chromosome 2. RPTPrho expression is restricted to the central nervous system.

**RESULTS:** The cloning of the mouse cDNA, identification of alternatively spliced exons, detection of an 8 kb 3'-UTR, and the genomic organization of human and mouse RPTPrho genes are described. The two genes are comprised of at least 33 exons. Both RPTPrho genes span over 1 Mbp and are the largest RPTP genes characterized. Exons encoding the extracellular segment through the intracellular juxtamembrane 'wedge' region are widely spaced, with introns ranging from 9.7 to 303.7 kb. In contrast, exons encoding the two phosphatase domains are more tightly clustered, with 15 exons spanning approximately 60 kb, and introns ranging in size from 0.6 kb to 13.1 kb. Phase 0 introns predominate in the intracellular, and phase 1 in the extracellular segment. **CONCLUSIONS:** We report the first genomic characterization of a RPTP type IIB gene. Alternatively spliced variants may result in different RPTPrho isoforms. Our findings suggest that RPTPrho extracellular and intracellular segments originated as separate modular proteins that fused into a single transmembrane molecule during a later evolutionary period.

Brain Res Mol Brain Res. 1998 Sep 18;60(1):1-12. LAR tyrosine phosphatase receptor: proximal membrane alternative splicing is coordinated with regional expression and intraneuronal localization. Honkaniemi J, Zhang JS, Yang T, Zhang C, Tisi MA, Longo FM.

Examination of null-mutant *Drosophila* and Leukocyte Common Antigen-Related (LAR)-deficient transgenic mice has demonstrated that the LAR protein tyrosine phosphatase (PTP) receptor promotes neurite outgrowth. In the absence of known ligands, the mechanisms by which LAR-type PTP receptors are regulated are unknown. We

hypothesized that an alternatively spliced eleven amino acid proximal membrane segment of LAR (LAR alternatively spliced element-a; LASE-a) contributes to regulation of LAR function. Human, rat and mouse LAR cDNA sequences demonstrated that the predicted eleven amino acid inserts in rat and mouse are identical and share nine of eleven residues with the human insert. LASE-a splicing led to the introduction of a Ser residue into LAR at a position analogous to Ser residues undergoing regulated phosphorylation in other PTPs. In-situ studies revealed increasingly region-specific expression of LASE-a containing LAR transcripts during postnatal development. RT-PCR analysis of cortical and hippocampal tissue confirmed that the proportion of LAR transcripts containing LASE-a decreases during development. Immunostaining of cultured PC12 cells, cerebellar granule neurons, dorsal root ganglia and sciatic nerve sections with antibody directed against the LASE-a insert demonstrated signal in cell bodies but little if any along neurites. In contrast, staining with antibody directed to a separate domain of LAR showed accumulation of LAR along neurites. The findings that LASE-a splicing is conserved across human, rat and mouse, that the LASE-a insert introduces a Ser at a site likely to be targeted for regulated phosphorylation and that developmentally regulated splicing is coordinated with specific regional and intraneuronal localization point to important novel potential mechanisms regulating LAR-type tyrosine phosphatase receptor function in the nervous system.

*J Cell Biol.* 1995 Feb;128(3):415-31. LAR tyrosine phosphatase receptor: alternative splicing is preferential to the nervous system, coordinated with cell growth and generates novel isoforms containing extensive CAG repeats. Zhang JS, Longo FM.

Receptor-linked tyrosine phosphatases regulate cell growth by dephosphorylating proteins involved in tyrosine kinase signal transduction. The leukocyte common antigen-related (LAR) tyrosine phosphatase receptor has sequence similarity to the neural cell adhesion molecule N-CAM and is located in a chromosomal region (1p32-33) frequently altered in neuroectodermal tumors. To understand the function of receptor-linked tyrosine phosphatases in neural development, we sought to identify LAR isoforms preferentially expressed in the nervous system and cellular processes regulating LAR alternative splicing. We report here the isolation of a series of rat LAR cDNA clones arising from complex combinatorial alternative splicing, not previously demonstrated for the tyrosine phosphatase-receptor gene family in general. Isoforms included: (a) deletions of the fourth, sixth and seventh fibronectin type III-like domains; (b) an alternatively spliced novel cassette exon in the fifth fibronectin type III-like domain; (c) two alternatively spliced novel cassette exons in the juxtamembrane region; (d) a retained intron in the extracellular region with in-frame stop codons predicting a secreted LAR isoform; and (e) an LAR transcript including an alternative 3' untranslated region containing multiple stretches of tandem CAG repeats up to 21 repeats in length. This number of repeats was in the range found in normal alleles of genes in which expansions of repeats are associated with neurodegenerative disease and the genetic phenomenon of anticipation. RT-PCR and Northern analysis demonstrated that LAR alternative splicing occurred preferentially in neuromuscular tissue in vivo and in neurons compared to astrocytes in vitro and was developmentally regulated. Alternative splicing was also regulated in PC12 cells by NGF, in 3T3 fibroblasts by cell confluence and in sciatic nerve and muscle

subsequent to nerve transection. Western blot analysis demonstrated that alternatively spliced cassette exons result in the presence of corresponding amino acid segments of LAR protein *in vivo*. These studies suggest specialized functions of LAR isoforms in the nervous system and support our hypothesis that LAR-like tyrosine phosphatase receptors play a role in neural development and regeneration.

## Gabbr1

*Cytogenet Cell Genet.* 2001;92(1-2):116-21. The murine GABA(B) receptor 1: cDNA cloning, tissue distribution, structure of the *Gabbr1* gene, and mapping to chromosome 17. Lamp K, Humeny A, Nikolic Z, Imai K, Adamski J, Schiebel K, Becker CM. GABA (gamma-aminobutyric acid) is a major inhibitory neurotransmitter in the central nervous system (CNS) which activates both ionotropic (GABA(A)/GABA(C)) and metabotropic (GABA(B)) receptor systems. We identified two alternatively spliced cDNA variants of the murine GABA(B) receptor 1 that are predominantly expressed in the CNS. Deduced protein structures are highly homologous to the previously characterized rat and human receptors. Comparison of the genomic structures of mouse and human revealed that alternative splicing occurred at the same position, whereas the mouse gene has an additional 5' exon. Radiation hybrid mapping, combined with database searches, indicated that the GABA(B) receptor gene (*Gabbr1*) is located on mouse chromosome 17, adjacent to the marker D17Mit24 in a region homologous to human chromosome 6p21.3.

## GABAB receptor

*Neuron.* 2006 May 18;50(4):589-601. Differential compartmentalization and distinct functions of GABAB receptor variants. Vigot R, Barbieri S, Bräuner-Osborne H, Turecek R, Shigemoto R, Zhang YP, Luján R, Jacobson LH, Biermann B, Fritschy JM, Vacher CM, Müller M, Sansig G, Guetg N, Cryan JF, Kaupmann K, Gassmann M, Oertner TG, Bettler B.

GABAB receptors are the G protein-coupled receptors for the main inhibitory neurotransmitter in the brain, gamma-aminobutyric acid (GABA). Molecular diversity in the GABAB system arises from the GABAB1a and GABAB1b subunit isoforms that solely differ in their ectodomains by a pair of sushi repeats that is unique to GABAB1a. Using a combined genetic, physiological, and morphological approach, we now demonstrate that GABAB1 isoforms localize to distinct synaptic sites and convey separate functions *in vivo*. At hippocampal CA3-to-CA1 synapses, GABAB1a assembles heteroreceptors inhibiting glutamate release, while predominantly GABAB1b mediates postsynaptic inhibition. Electron microscopy reveals a synaptic distribution of GABAB1 isoforms that agrees with the observed functional differences. Transfected CA3 neurons selectively express GABAB1a in distal axons, suggesting that the sushi repeats, a conserved protein interaction motif, specify heteroreceptor localization. The constitutive absence of GABAB1a but not GABAB1b results in impaired synaptic plasticity and hippocampus-dependent memory, emphasizing molecular differences in synaptic GABAB functions.

## 4. GABAB-receptor isoforms

When it became apparent that probably all GABAB receptors in the vertebrate brain are the sole products of the GABAB(1) and GABAB(2) genes, much attention focused on

subunit isoforms. Many in the field wondered whether isoforms encoded pharmacological differences and accounted for the heterogeneity observed with native GABAB receptors. Rapidly numerous GABAB isoforms were identified (recently reviewed in Ref. 29). A close inspection of GABAB gene structures indicates that not all of these splice variants are real and that some do not occur across different species. A summary of confirmed GABAB isoforms is shown in Figure 2. While in most laboratories mixing and matching of isoforms did not produce GABAB receptors with distinct functional and pharmacological properties, others reported differences that are, however, highly controversial (see sect. IIIA4A). GABAB isoforms may afford the means for a differential subcellular targeting and/or coupling to distinct intracellular signaling pathways. To some extent a coupling to different effector systems could mimic a differential pharmacology and explain some of the differences that were observed with native GABAB receptors.

The distinct ECD in GABAB(1b) results from the presence of an alternative transcription initiation site within the GABAB(1a) intron upstream of exon 6, thereby extending exon 6 at its 5'-end

GABAB(1e) encodes the extracellular ligand-binding domain of the GABAB(1a) subunit. GABAB(1e) is generated by skipping of exon 15 and is detected both in rats and humans. While the GABAB(1e) transcript is a minor component in the CNS, it is very prominent in peripheral tissues. GABAB(1e) is secreted into the culture medium when expressed in transfected mammalian cells. Additionally, it also forms stable heteromeric complexes with GABAB(2) at the plasma membrane.

GABAB(1g) is characterized by an insertion of 124 bp between exon 4 and 5, which generates a frameshift. GABAB(1g) encodes a COOH-terminally truncated polypeptide of 239 amino acid residues of unknown function.

## Cadps2

From BMC Neurosci. 2007; 8: 25. Alternative splicing variations in mouse CAPS2: differential expression and functional properties of splicing variants. Tetsushi Sadakata,1 Miwa Washida,1 and Teiichi Furuichi

In this study, we defined 31 exons in the mouse CAPS2 gene and identified six alternative splicing variants, CAPS2a-f. CAPS2a is an isoform lacking exons 22 and 25, which encode part of the Munc13-1-homologous domain (MHD). CAPS2b lacks exon 25. CAPS2c lacks exons 11 and 22. CAPS2d, 2e, and 2f have C-terminal deletions from exon 14, exon 12, and exon 5, respectively. On the other hand, a mouse counterpart of CAPS2 $\Delta$ exon3 was not detected in the mouse tissues tested. CAPS2b was expressed exclusively in the brain, and the other isoforms were highly expressed in the brain, but also in some non-neural tissues. In the brain, all isoforms showed predominant expression patterns in the cerebellum. In the developing cerebellum, CAPS2b showed an up-regulated expression pattern, whereas the other isoforms exhibited transiently peaked expression patterns. CAPS2 proteins were mostly recovered in soluble fractions, but some were present in membrane fractions, except for CAPS2c and 2f, both of which lack the PH domain, suggesting that the PH domain is important for membrane association. In contrast to CAPS2a and 2b, CAPS2c showed slightly decreased BDNF-releasing activity, which is likely due to the Cterminal truncation of the PH domain in CAPS2c.

The Ca<sup>2+</sup>-dependent activator protein for secretion (CAPS/CADPS) family consists of two members, CAPS1/CADPS1 [1-3] and CAPS2/CADPS2 [4-6]. CAPS1 was shown to play a role in the ATP-dependent priming step of Ca<sup>2+</sup>-triggered dense-core vesicle (DCV) exocytosis by binding to both phosphatidyl inositol 4,5-bisphosphate and DCVs in response to Ca<sup>2+</sup> increase [7,8]; it also interacts with the dopamine receptor [9]. A study of CAPS1-deficient mice suggested that CAPS1 is involved in catecholamine loading of DCVs in embryonic chromaffin cells [10]. On the other hand, CAPS2 is associated with secretory vesicles containing the neurotrophins BDNF and NT-3 in the parallel fiber terminals of cerebellar granule cells, and is involved in the release of BDNF and NT-3 [6]. CAPS2 is widely localized across various brain regions, and shows overlapping distribution patterns with BDNF in many areas [11]. Our recent studies of CAPS2-deficient mice indicated that CAPS2 plays pivotal roles in BDNF release, cellular phenotypes (e.g., neuronal survival and differentiation, synapse structure and function), and behavioral phenotypes (e.g., water-maze spatial learning, anxiety, circadian rhythm, maternal behavior) [12,13].

The expression of an aberrant splicing variant of CAPS2 in some patients with autism has also been reported [12]. The autistic isoform, CAPS2[Delta]exon3, is missing exon 3, which encodes the dynactin 1-interacting domain (DID) [12]. Exogenously expressed CAPS2[Delta]exon3 failed to localize to axons but accumulated in somato-dendritic areas in cultured cerebellar and cortical neurons, suggesting a possible disturbance of local CAPS2-mediated neurotrophin release [12]. In this study, we further explore splicing variations in CAPS2 and identified five additional splice isoforms. We characterized the expression patterns and neurotrophin release properties of these isoforms.

The full-length CAPS2 protein consists of the following functional domains, as shown in Figure 2: a dynactin 1-interacting domain (DID), a C2 domain, a pleckstrin homology (PH) domain and a Munc13-1-homologous domain (MHD). CAPS2b lacks only exon 25, which encodes a part of the MHD. CAPS2a lacks two exons, 22 and 25, which encode part of the MHD sequence. CAPS2c lacks two exons, exon 11 encoding a C-terminal part of the PH domain, and exon 22. In contrast to these three long isoforms (CAPS2a-c), CAPS2d, 2e and 2f have large C-terminal large truncations from exon 14, 12, and 5, respectively; thus, these isoforms have neither the MHD nor the C-tail domain, which mediates the association of CAPS with DCVs [7]. These three short isoforms (CAPS2d-f) have an additional unique exon at their 3' end. The shortest isoform, CAPS2f, has only the first four authentic exons and none of the functional domains identified so far.

All isoforms (CAPS2a-f) have exon 3, which contains the domain interacting with p150Glued [12]. The mouse CAPS2 exon 3 coding sequence is identical to the human CAPS2 exon 3 coding sequence, which is absent in some autistic patients. As shown in Figure 3A, no exon 3 skipping was observed during the development of the cerebellum, from E18 to P56, provided there were sufficient PCR cycles. Moreover, no exon 3 skipping was observed in whole brain, thymus, lung, heart, liver, spleen, kidney, or testis from P7 or P21 mice (Figure 3A). These results suggest that exon 3 skipping does not normally occur in mouse CAPS2.

## Otof

*Am J Hum Genet.* 2000 September; 67(3): 591–600. OTOF encodes multiple long and short isoforms: genetic evidence that the long ones underlie recessive deafness DFNB9.



Yasunaga S, Grati M, Chardenoux S, Smith TN, Friedman TB, Lalwani AK, Wilcox ER, Petit C.

Deafness is one of the most frequent hereditary disorders in humans. The vast majority of genetic prelingual hearing loss is inherited on the autosomal recessive mode (DFNB forms) (for review, see work by Petit [1996]). To date, 26 DFNB loci have been mapped (see Web site for Nonsyndromic Hearing Impairment Autosomal Recessive Loci) and six genes have been identified (Kelsell et al. 1997; Liu et al. 1997; Weil et al. 1997; Li et al. 1998; Wang et al. 1998; Mustapha et al. 1999; Yasunaga et al. 1999). Using a positional cloning strategy combined to a candidate gene approach, we have identified the OTOF gene, encoding otoferlin, as responsible for DFNB9 (MIM 601071) (Yasunaga et al. 1999). The 5-kb OTOF cDNA from a total fetus polyA<sup>+</sup> mRNA preparation, encodes a putative 1,230-aa membrane-anchored cytosolic protein containing three predicted C2 domains (Yasunaga et al. 1999) (GenBank AF107403). A single nonsense mutation has been detected in the four analyzed Lebanese families. This mutation is predicted to truncate the 500 C-terminal amino acids of the protein (Yasunaga et al. 1999). OTOF is a member of a mammalian gene family related to the *Caenorhabditis elegans* gene *fer-1* (Achanzar and Ward 1997). This family also comprises DYSF (Bashir et al. 1998; Liu et al. 1998) and MYOF (Davis et al. 2000), encoding dysferlin (2080 aa) and myoferlin (2061 aa), respectively. Both dysferlin and myoferlin are membrane-anchored cytosolic proteins that contain six predicted C2 domains, four of which are expected to bind Ca<sup>2+</sup> (Rizo and Südhof 1998). Subsequent detection of a 7-kb otoferlin mRNA by northern blot analysis prompted us to characterize this transcript which had not been detected in our initial study.

Interestingly, several alternatively spliced long forms of otoferlin transcripts were detected in both mice and humans. Firstly, in the murine brain and cochlea, cDNAs were found that resulted from the skipping of exon 6 (fig. 4A). Exon 6 encodes 15 aa located in the N-terminal part of the first inter-C2 domain region (aa 169–184 in the murine cochlear form [GenBank AF183183]). RT-PCR experiments on human brain RNA also revealed a single product that resulted from the skipping of exon 6 (data not shown). Secondly, RT-PCR analysis of the cDNA sequence corresponding to exon 31 in the murine brain and cochlea, revealed two different products resulting from the alternative use of an acceptor splice site within exon 31 (table 2) (fig. 4B). The same results were obtained in the human brain (GenBank AF183186). By contrast, in the human heart, kidney, and total fetus, only the shorter PCR product corresponding to the use of the internal splice site was detected (data not shown). The additional 20 aa encoded by the 5' part of this exon belong to the fourth inter C2 domain region (aa position 1244–1264 in the murine brain sequence GenBank AF183184, and aa position 1245–1265 in the human brain sequence [GenBank AF183185] [fig. 1]).

## Cobl

Cell. 2007 Oct 19;131(2):337-50. Cordon-bleu is an actin nucleation factor and controls neuronal morphology. Ahuja R, Pinyol R, Reichenbach N, Custer L, Klingensmith J, Kessels MM, Qualmann B.

Despite the wealth of different actin structures formed, only two actin nucleation factors are well established in vertebrates: the Arp2/3 complex and formins. Here, we describe a further nucleator, cordon-bleu (Cobl). Cobl is a brain-enriched protein using three Wiskott-Aldrich syndrome protein homology 2 (WH2) domains for actin binding. Cobl promotes nonbundled, unbranched filaments. Filament formation relies on barbed-end

growth and requires all three Cobl WH2 domains and the extended linker L2. We suggest that the nucleation power of Cobl is based on the assembly of three actin monomers in cross-filament orientation. Cobl localizes to sites of high actin dynamics and modulates cell morphology. In neurons, induction of both neurites and neurite branching is dramatically increased by Cobl expression—effects that critically depend on Cobl's actin nucleation ability. Correspondingly, Cobl depletion results in decreased dendritic arborization. Thus, Cobl is an actin nucleator controlling neuronal morphology and development.

*Dev Biol.* 2003 Oct 1;262(1):16-31. Cordon-bleu is a conserved gene involved in neural tube formation. Carroll EA, Gerrelli D, Gasca S, Berg E, Beier DR, Copp AJ, Klingensmith J.

The axial midline is an important source of patterning and morphogenesis cues in the vertebrate embryo. The midline derives from a small group of cells in the gastrulating embryo, known as "the organizer" in recognition of its ability to organize an entire body plan. The mammalian organizer, the node, gives rise to axial midline structures: the notochord, dorsal foregut, and part of the floor plate of the neural tube. Only some of the genes that direct midline development are known. In this study, we present the complete coding sequence for a novel gene, cordon-bleu (*cobl*), expressed specifically in the node and its derivatives until organogenesis stages. The deduced sequence does not resemble any gene of known function. However, *cobl* is widely conserved: apparent orthologs and paralogs are found in many vertebrate species, with several sequence domains of high conservation but unknown function. We find that chicken cordon-bleu is similarly expressed in the node and its derivatives, suggesting functional conservation. We also report the sequence and nonoverlapping expression of a related mouse gene, *Cobl1*. Finally, we show that *cobl* interacts with the neurulation gene *Vangl2* to facilitate midbrain neural tube closure, demonstrating roles for both *cobl* and *Vangl2* in midbrain neurulation.

Although the sequence of *cobl* is novel, we have identified homologues in several vertebrate species by database searches. None represents a gene product associated with known functions. The human clone KIAA0633 shows homology with mouse *Cobl* throughout its length, with an overall sequence identity of 67% and similarity of 86%, reflecting conserved amino acid substitutions (Fig. 2A). The greatest conservation is found at the N-terminal third of the proteins, the region containing the three repeated "KRAP" motifs, with identity of 84% and similarity of 94%. Considerable homology is also found in the last 200 residues, including the 3 WH2 domains (74% identical, 92% conserved). This probable human *cobl* orthologue was found in an effort to sequence large cDNAs from adult human brain [Ishikawa et al., 1998], but fragments of it have also been sequenced in cDNAs from whole fetus (8–9 weeks), and normal adult lung, liver, and pancreas, tissues where mouse *cobl* is also expressed.

Human genome sequencing projects localize human *cobl* at chromosomal position 7p12. The genomic DNA encoding KIAA0633 resides in two sequenced PAC clones in this region ([The Sanger Centre and The Washington University Genome Sequencing Center, 1998]; Accession Nos. AC005535 and AC004414). Although *cobl* is located near the imprinted gene *Grb10* in both human and mouse, neither *cobl* homologue is imprinted [Hitchins et al., 2002]; data not shown).

Partial cDNAs characterized as expressed sequence tags (ESTs) from a variety of

vertebrate species have also shown homology to *cobl*. An alignment of several homologous sequences is shown in Fig. 2B, with putative *cobl* orthologues identified in the human, chicken, and *Xenopus* genomes. The most significant homology is found in the N-terminal third of the protein, with sequence similarity of 37% for all, excluding an alternatively spliced exon, found only in mouse and human cDNAs to date.

Mice that are homozygous for the *cobl*C101 gene trap do not have any phenotype, in either an outbred or inbred background [Gasca et al., 1995]. We have demonstrated here that wild-type message is still transcribed in *cobl*C101 homozygous mice. The explanation for the paradoxical presence of wild-type message in the absence of wild-type alleles lies in the nature of the gene trap vector used in the gene trap screen that identified *cobl* [Gasca et al., 1995]. In some portion of *cobl*C101 mRNAs, the gene trap is spliced out, presumably via utilization of a splice acceptor other than that in the vector. Northern blots from homozygous ES cells suggest that wild-type message occurs at significant levels, though less abundant than the fusion transcript [Gasca et al., 1995]. Splicing around gene trap insertions has been observed previously (e.g., [Voss et al., 1998]). In a *cobl*C101/*cobl*C101 animal, the transcripts from the *cobl* locus are a mix of wild-type and *cobl*-lacZ fusion messages. Thus, the level of normal *cobl* transcript is lower in *cobl*C101/*cobl*C101 mice than in heterozygous or wild-type mice, and likely results in lower levels of Cobl protein being made. At least for developmentally regulated genes, reduced expression of wild-type transcript from an allele often makes it a hypomorph [Meyers et al., 1998 and Nagy et al., 1998]. In the case of *cobl*, it appears that the level of protein resulting from the *cobl*C101 allele is enough to maintain function in the absence of other interacting mutations. However, the new phenotype generated when *cobl*C101 is homozygous in combination with Lp demonstrates that *cobl*C101 is not wild-type in function. Furthermore, there is no phenotype associated with decreased Lp when *cobl*C101 is heterozygous. This suggests that *cobl*C101 is not a gain-of-function allele that acts only in the presence of decreased Vang12 activity. Taken together, these data indicate that *cobl*C101 is a hypomorphic allele. Most likely, it is weakly hypomorphic, since defects have only been seen in the presence of decreased Vang12 and since considerable wild-type message remains in *cobl*C101 homozygotes. The consequences of a null allele remain undetermined at present.

Phenotypic analysis of animals carrying both *cobl*C101 and loop-tail (*Vang12*Lp) mutant alleles reveals that these genes have a role in neural tube closure in the midbrain. This phenotype is quite evident by E9.5, at a time when *cobl* is expressed in the floor plate but not more dorsally. Despite the presence of *cobl* expression in the dorsal neural tube by E11.5, then, this domain does not account for the neural tube closure defect.

SORBS2 = ArgBP2

Arg and c-Abl represent the mammalian members of the Abelson family of non-receptor protein-tyrosine kinases. They interact with the Arg/Abl binding proteins via the SH3 domains present in the carboxy end of the latter group of proteins. This gene encodes the sorbin and SH3 domain containing 2 protein. It has three C-terminal SH3 domains and an N-terminal sorbin homology (SoHo) domain that interacts with lipid raft proteins. The subcellular localization of this protein in epithelial and cardiac muscle cells suggests that it functions as an adapter protein to assemble signaling complexes in stress fibers, and that it is a potential link between Abl family kinases and the actin cytoskeleton.

Alternative splicing results in multiple transcript variants encoding different isoforms.

J Biol Chem. 1997 Jul 11;272(28):17542-50. ArgBP2, a multiple Src homology 3 domain-containing, Arg/Abl-interacting protein, is phosphorylated in v-Abl-transformed cells and localized in stress fibers and cardiocyte Z-disks. Wang B, Golemis EA, Kruh GD.

Arg and c-Abl represent the mammalian members of the Abelson family of protein-tyrosine kinases. A novel Arg/Abl-binding protein, ArgBP2, was isolated using a segment of the Arg COOH-terminal domain as bait in the yeast two-hybrid system. ArgBP2 contains three COOH-terminal Src homology 3 domains, a serine/threonine-rich domain, and several potential Abl phosphorylation sites. ArgBP2 associates with and is a substrate of Arg and v-Abl, and is phosphorylated on tyrosine in v-Abl-transformed cells. ArgBP2 is widely expressed in human tissues and extremely abundant in heart. In epithelial cells ArgBP2 is located in stress fibers and the nucleus, similar to the reported localization of c-Abl. In cardiac muscle cells ArgBP2 is located in the Z-disks of sarcomeres. These observations suggest that ArgBP2 functions as an adapter protein to assemble signaling complexes in stress fibers, and that ArgBP2 is a potential link between Abl family kinases and the actin cytoskeleton. In addition, the localization of ArgBP2 to Z-disks suggests that ArgBP2 may influence the contractile or elastic properties of cardiac sarcomeres and that the Z-disk is a target of signal transduction cascades.

In the present study we describe ArgBP2, the second Arg-binding protein that we isolated using a segment of the Arg COOH-terminal domain as bait in the yeast two-hybrid system. ArgBP2 contains three COOH-terminal SH3 domains, several potential phosphorylation sites for c-Abl, and a serine/threonine-rich region. We show that ArgBP2 associates with Arg and v-Abl in living cells and that the endogenous ArgBP2 protein is phosphorylated on tyrosine residues in v-Abl-transformed NIH3T3 cells. ArgBP2 is widely expressed in human tissues and extremely abundant in heart. In epithelial cells ArgBP2 is located in stress fibers and the nucleus, similar to the reported localization of c-Abl. In cardiac muscle cells ArgBP2 is localized in the Z-disks of sarcomeres. Thus, this study suggests that ArgBP2 functions as an adapter protein to assemble signaling complexes in stress fibers, and that ArgBP2 is a potential link between Abl family kinases and the actin cytoskeleton. In addition, ArgBP2 is the first known component of the Z-disk that associates with signaling cascades. The localization of ArgBP2 in Z-disks thus suggests that ArgBP2 may function to influence the contractile or elastic properties of cardiac sarcomeres, and that the Z-disk may be target of signal transduction cascades.

The largest ArgBP2 insert contained a 250-amino acid open reading frame, followed by a stop codon and 250 base pairs of 3'-untranslated sequences. Additional cDNA clones were isolated from a human heart cDNA library by plaque hybridization using an ArgBP2 cDNA insert as the radiolabeled probe. Several cDNA clones were characterized and nucleotide sequence analysis revealed that they represented two distinct classes of ArgBP2 cDNAs (Fig. 1). Analysis of one class of cDNAs (five clones), designated ArgBP2A, indicated that they spanned a total of 5.6 kb. The ArgBP2A sequence encoded a predicted protein of 666 amino acids bordered by in-frame stop codons, indicating that it represented a full-length open reading frame. A second class of cDNAs (two clones), designated ArgBP2B, encoded a partial open reading frame of 618 amino acids followed by a stop codon and 257 base pairs of 3'-untranslated sequence. The partial ArgBP2B predicted protein, which began at the 27th codon of ArgBP2A, was identical to the latter predicted protein over most of its sequences, but differed at its midportion and COOH terminus. To obtain additional 5' sequences of ArgBP2B, a reverse transcription PCR

approach was employed using a primer located 59 of the upstream in-frame stop codon of ArgBP2A and two nested primers located in the unique ArgBP2B midregion. Nucleotide sequence analysis of the PCR product indicated that the aminoterminal sequence of ArgBP2B was identical to that of ArgBP2A.

J Biol Chem. 2005 Jun 3;280(22):21483-90. Epub 2005 Mar 22. ArgBP2gamma interacts with Akt and p21-activated kinase-1 and promotes cell survival. Yuan ZQ, Kim D, Kaneko S, Sussman M, Bokoch GM, Kruh GD, Nicosia SV, Testa JR, Cheng JQ. Akt/protein kinase B is a major cell survival pathway through phosphorylation of proapoptotic proteins Bad and Bax and of additional apoptotic pathways linked to Forkhead proteins glycogen synthase kinase-3beta and ASK1. To further explore the mechanism by which Akt regulates cell survival, we identified an Akt interaction protein by yeast two-hybrid screening. It is highly homologous to ARG-binding protein 2 (ArgBP2) with splicing exon 8 of the coding region of the ArgBP2. As two splicing isoforms (ArgBP2alpha and -beta) of ArgBP2 have been identified (Wang, B., Golemis, E. A., and Kruh, G. D. (1997) J. Biol. Chem. 272, 17542-17550), it was named ArgBP2gamma. ArgBP2gamma contains four Akt phosphorylation consensus sites, a SoHo motif, and three Src homology (SH) 3 domains and binds to C-terminal proline-rich motifs of Akt through its first and second SH3 domains. It also interacts with p21-activated protein kinase (PAK1) via its first and third SH3 domains, indicating the SH3 domains of ArgBP2gamma as docking sites for Akt and PAK1. Akt phosphorylates ArgBP2gamma in vitro and in vivo. Expression of ArgBP2gamma induces PAK1 activity and overrides apoptosis induced by ectopic expression of Bad or DNA damage. Nonphosphorylatable ArgBP2gamma-4A and SH3 domain-truncated mutant ArgBP2gamma inhibit Akt-induced PAK1 activation and reduce Akt and PAK1 phosphorylation of Bad and antiapoptotic function. These data indicate that ArgBP2gamma is a physiological substrate of Akt, functions as an adaptor for Akt and PAK1, and plays a role in Akt/PAK1 cell survival pathway.

J Cell Sci. 2004 May 15;117(Pt 12):2557-68. Epub 2004 May 5. Recruitment of Pyk2 and Cbl to lipid rafts mediates signals important for actin reorganization in growing neurites. Haglund K, Ivankovic-Dikic I, Shimokawa N, Kruh GD, Dikic I. Protein tyrosine kinase Pyk2 and multifunctional adaptor protein Cbl are implicated in the regulation of the cytoskeleton in several cell types. We report that Pyk2 and Cbl form a signaling complex that is translocated to lipid rafts and is enriched in growth cones of differentiating PC12 cells following growth factor stimulation. We found that Pyk2 and Cbl interacted with the adaptor protein ArgBP2, which also bound to flotillin-1, a component of lipid raft microdomains. These interactions contributed to recruitment of the Pyk2/Cbl complex to lipid raft compartments. In addition, Pyk2, Cbl and ArgBP2 were found co-localized with actin in axons and growth cones of differentiated PC12 cells. Moreover, co-expression of Pyk2, ArgBP2 and Cbl facilitated growth factor-induced formation of lamellipodia at the tip of neurites. Formation of these growth cone lamellipodia was dependent on intact lipid rafts and the Cbl-associated effectors Crk and phosphatidylinositol 3 (PI 3)-kinase. Our results indicate that recruitment of Pyk2/Cbl complexes to lipid rafts participates in growth factor-induced regulation of the actin cytoskeleton in growing neurites.

Mlx

Oncogene. 2000 Jul 6;19(29):3266-77. Mlx, a new Max-like bHLHZip family member: the center stage of a novel transcription factors regulatory pathway? Meroni G, Cairo S, Merla G, Messali S, Brent R, Ballabio A, Reymond A.

The Myc proto-oncogene family members have been identified as the cellular homologs of the transforming oncogene of avian retroviruses. They encode central regulators of mammalian cell proliferation and apoptosis, and they associate with the bHLHZip protein Max to bind specific DNA sequences and regulate the expression of genes important for cell cycle progression. The other family members, Mad1, Mxi1, Mad3, Mad4 and Rox (Mnt) antagonize their activities. The Mads and Rox compete with Myc in heterodimerizing with Max and in binding to the same specific target sequences. These Mads:Max and Rox:Max dimers repress transcription through binding to the mSIN3 corepressor protein and by tethering histone deacetylase-containing complexes to the DNA. In a screen for Rox interactors we isolated Mlx, a bHLHZip protein previously identified in a screen for Mad1 interactors. In the present work we extend the known dimerization partners of Mlx by demonstrating its ability to interact with Rox. Moreover, we show that contrary to previous reports Mlx is able to homodimerize and to bind E-box sequences at low concentration levels. The possible role of Mlx in an emerging regulatory pathway and acting parallel to the Max driven network is discussed.

The basic region recognizes a canonical CANNTG DNA-binding sequence called E-box (Blackwell et al., 1993). The HLH and Zip motifs participate in protein dimerization, a prerequisite for DNA-binding. Max is a widely expressed and stable bHLHZip protein that forms DNA-binding heterodimers with the Myc and Mad proteins (Ayer et al., 1993; Blackwood and Eisenman, 1991; Hurlin et al., 1995b; Prendergast et al., 1991; Zervos et al., 1993). Although Myc-Max and Mad-Max heterodimers bind the same E-box-related DNA sequences, they elicit different transcriptional responses. Reporter genes under the control of E-box elements are activated by Myc-Max, while Mad-Max represses their transcription (Amati et al., 1992; Ayer et al., 1993; Hurlin et al., 1995b; Kretzner et al., 1992). Thus it appears that Myc activates, while Mad represses, genes involved in promoting cellular proliferation (reviewed in Cole and McMahon, 1999; Dang, 1999; Peters and Taparowsky, 1998).

This screening allowed us to identify four new Rox-interactors. In this report we describe the cloning and functional characterization of one of these interactors, a new mammalian bHLHZip protein (see Figure 1a). Due to its sequence, size, overall similarity and function features we named the gene BigMax (see below).

From the two-hybrid screening, we recovered four clones corresponding to two independent and overlapping BigMax cDNAs (clones 630, 640, 692 and 694, see Figure 1a). These cDNAs represent the human homolog of murine transcription factor like protein 4 (TCFL4) (Bjerknes and Cheng, 1996). TCFL4 was cloned from the mouse 17q21 syntenic region where BRCA1 was mapped (Friedman et al., 1994, 1995). However, these clones lack 162 bp of exon 1 and constitute an alternatively spliced form of the human TCFL4 (isoform BigMax-beta, see Figure 1d). A human clone corresponding to complete murine TCFL4 was also isolated through a database search (isoform BigMax-gamma, see Figure 1d) (IMAGE clone 488171). Moreover, a third isoform lacking exon 3 and 162 bp in exon 1 (isoform BigMax-alpha, see Figure 1d) was identified in dbEST (IMAGE clones 488652 and 502642). Nested PCR analysis on cDNA libraries (serum starved WI-38 cells, fetal brain, HeLa and keratinocyte cells) excluded the possibility that the two newly identified splice forms resulted from cloning artifacts. During the preparation of this manuscript, BigMax-beta was independently isolated and

named Mlx by Donald E Ayer and collaborators in a screen for new Mad1 interactors (Billin et al., 1999). For the sake of clarity and to avoid confusion, we decided to adopt their nomenclature and name the BigMax-alpha, -beta and -gamma isoforms, Mlx-alpha, -beta and -gamma, respectively.

The entire Mlx gene spans approximately 7 kb and is contained in a fully sequenced cosmid (GenBank accession number U34879, (Zhao et al., 1996)). It consists of eight exons which can be alternatively spliced to encode the different isoforms (see Figure 1a,d). Interestingly, the two shorter isoforms (-alpha and -beta) use a cryptic AGGcaagc donor site in exon 1A.

We sequenced the three alternative Mlx-alpha, -beta and -gamma isoforms and deposited them in GenBank (accession numbers AF213666, AF213667 and AF213668, respectively). The putative initiation codon properly fulfills Kozak's criteria (Kozak, 1984), but no in frame 5'UTR STOP codon was identified in any of the six independent clones we isolated. We also cloned and sequenced the murine Mlx alternatively spliced forms to confirm their existence in rodents (mMlx-alpha, -beta and -gamma, GenBank accession numbers AF213670, AF213671 and AF213672, respectively).

To test whether Mlx isoforms are tissue specific, a qualitative study of the presence or absence of the three Mlx isoforms was performed by PCR on the Express-Check panel of 62 tissue-specific cDNA libraries (ATCC). We found the three Mlx-alpha, -beta and -gamma isoforms throughout the panel (data not shown). These data show that Mlx isoforms, like the Max isoforms, are not tissue specific. The semi-quantitative PCR conditions used in these experiments allowed us to conclude that in a large number of tissues, Mlx-alpha and -gamma are more abundant than the rarer Mlx-beta, whereas this ratio is inverted in favor of isoform beta in the basal ganglia, liver, placenta and pancreatic islets (data not shown). These results demonstrate that while the isoforms are not tissue specific, their ratio probably is, as previously shown for some of the Max protein isoforms (Makela et al., 1992).

Alternative splice forms may induce subtle differences in DNA binding as in the case of Max1 versus Max2 (Prochownik and VanAntwerp, 1993), but no obvious changes in E-box binding were observed with Mlx-alpha, -beta and -gamma. These results confirm the ability of Mlx to readily homodimerize and bind DNA even at low concentration.

The two shorter isoforms, Mlx-alpha and -beta, are predominantly cytoplasmic and only partially nuclear, while the Mlx-gamma isoform shows a predominantly nuclear localization. The longer isoform differs from both of the two shorter isoforms by the presence of exon 1B, which is 54 residues longer than exon 1A (see Figure 1a,b,c). Two sequences GRAGRARARRGAGRR and PACAKV, resembling a bipartite nuclear localization signal (NLS) and a portion of the c-Myc NLS (PAAKRVKLD), are present in this exon (reviewed in Nigg, 1997).

## Osbp1a

Mol Biol Cell. 2003 Mar;14(3):903-15. The two variants of oxysterol binding protein-related protein-1 display different tissue expression patterns, have different intracellular localization, and are functionally distinct. Johansson M, Bocher V, Lehto M, Chinetti G, Kuismanen E, Ehnholm C, Staels B, Olkkonen VM.

Oxysterol binding protein (OSBP) homologs comprise a family of 12 proteins in humans (Jaworski et al., 2001; Lehto et al., 2001). Two variants of OSBP-related protein (ORP) 1 have been identified: a short one that consists of the carboxy-terminal ligand binding domain only (ORP1S, 437 aa) and a longer N-terminally extended form (ORP1L, 950 aa) encompassing three ankyrin repeats and a pleckstrin homology domain (PHD). We now report that the two mRNAs show marked differences in tissue expression. ORP1S predominates in skeletal muscle and heart, whereas ORP1L is the most abundant form in brain and lung. On differentiation of primary human monocytes into macrophages, both ORP1S and ORP1L mRNAs were induced, the up-regulation of ORP1L being >100-fold. The intracellular localization of the two ORP1 variants was found to be different. Whereas ORP1S is largely cytosolic, the ORP1L variant localizes to late endosomes. A significant amount of ORP1S but only little ORP1L was found in the nucleus. The ORP1L ankyrin repeat region (aa 1-237) was found to localize to late endosomes such as the full-length protein. This localization was even more pronounced for a fragment that additionally includes the PHD (aa 1-408). The amino-terminal region of ORP1L consisting of the ankyrin repeat and PHDs is therefore likely to be responsible for the targeting of ORP1L to late endosomes. Interestingly, overexpression of ORP1L was found to enhance the LXR $\alpha$ -mediated transactivation of a reporter gene, whereas ORP1S failed to influence this process. The results suggest that the two forms of ORP1 are functionally distinct and that ORP1L is involved in control of cellular lipid metabolism.

Two mRNA variants of the ORP1 gene have recently been reported (Lehto et al., 2001 blue right-pointing triangle; Xu et al., 2001 blue right-pointing triangle). One of these, denoted hereafter as ORP1S (ORP1 “short”), encodes a predicted 50-kDa protein with 437 aa residues that consists of a ligand binding domain only (Xu et al., 2001 blue right-pointing triangle). The other, ORP1L (ORP1 “long”), encodes a 108-kDa protein with 950 aa. This protein structurally resembles OSBP, which has a PHD (Lemmon and Ferguson, 2000 blue right-pointing triangle) near its amino terminus. In addition, ORP1L has three ankyrin repeats (Sedgwick and Smerdon, 1999 blue right-pointing triangle) situated near the N terminus (Lehto et al., 2001 blue right-pointing triangle). The ORP1L transcript consists of sequences from 28 exons (Lehto et al., 2001 blue right-pointing triangle). The ORP1S mRNA is apparently generated through the use of an alternative first exon, named exon 1B, which in the genome is located between exons 15 and 16 (Figure 1). The two transcripts have been suggested to arise from the use of two different promoters (Jaworski et al., 2001 blue right-pointing triangle).

Real-time PCR analysis revealed that ORP1L expression was induced 100- to 160-fold during monocyte-macrophage differentiation. The expression of ORP1S was also up-regulated, but to a lesser extent (3- to 5-fold).

## Pctk1

Gene. 1996 Oct 17;176(1-2):243-7. Expression of alternatively spliced PCTAIRE-1 mRNA in PC12 cells and neonatal rat brain. Gao CY, Chauthaiwale VM, Rampalli AM, Zelenka PS.

A rat PCTAIRE-1 cDNA clone was isolated by immunoscreening of a PC12 cDNA library, followed by 5' RACE (rapid amplification of cDNA ends) to determine the 5' end. The rat PCTAIRE-1 cDNA sequence is 96% identical to mouse PCTAIRE-1 and contains an alternatively spliced exon of 131 bp near the 5' end. Although a mouse cDNA



containing this exon has been reported, examination of several mouse cell lines provided no evidence for expression of the corresponding mRNA (Okuda et al., 1992). In contrast, reverse transcription and polymerase chain reaction (RT/PCR) across this region using RNA from proliferating, differentiated, and apoptotic PC12 cells demonstrated that alternatively spliced forms of PCTAIRE-1 mRNA with and without this exon are expressed. Both forms of PCTAIRE-1 mRNA are also expressed in vivo in neonatal rat brain, although other tissues examined contained only the form lacking the alternatively spliced exon. In the absence of the alternatively spliced exon PCTAIRE-1 mRNA contains an open reading frame of 1488 bp, corresponding to a 55-kDa protein that is 97% identical to mouse PCTAIRE-1 protein. When the alternatively spliced exon is present (*actually an extension of exon 3 due to an upstream splice acceptor*), this open reading frame is terminated by a stop codon and a second open reading frame is initiated, predicting a second PCTAIRE-1 protein of 52 kDa. The two predicted PCTAIRE-1 proteins are identical downstream of the splice site, but share no homology at their N-terminal ends.

The rat PCTAIRE-1 cDNA sequence obtained by 5' RACE also contained a 131-bp sequence (453-583), which is not present in the human sequence (Meyerson et al., 1992). Since the 3' end of this sequence corresponds exactly to an intron/exon boundary of the human PCTAIRE-I gene (Okuda et al., 1994), it apparently represents an alternatively spliced exon. Although a corresponding sequence was previously observed in mouse PCTAIRE-1 cDNA, it could not be detected in mRNA of several cell lines tested (Okuda et al., 1992). To determine whether two, alternatively spliced forms of PCTAIRE-1 mRNA are expressed in PC12 cell mRNA, we performed RT/PCR using primers flanking this region and sequenced the PCR products. The results demonstrated that PCTAIRE-1 mRNAs with and without this sequence are expressed in PC12 cells (Fig. 3A). No change in the relative abundance of these forms was associated with differentiation or apoptosis (Fig. 3A). To determine whether these two PCTAIRE-1 mRNAs are also expressed in rat tissues in vivo, the same RT/PCR assay was performed using RNA isolated from brain, kidney, heart, and lung of 6-day-old neonatal rats and from adult rat lens fibers. A PCTAIRE-1 mRNA containing the alternatively spliced exon was observed only in the neonatal rat brain (Fig. 3B). It is not clear at the present whether both poly A addition sites (Fig. 2) are used for each of the alternatively spliced forms of mRNA detected by RT/PCR (Fig. 3).

Translation of the two PCTAIRE-1 mRNA sequences predicts the existence of two distinct PCTAIRE-1 proteins, which differ at the N-terminus. A 1488-bp open reading frame begins at nt 251 in the mRNA lacking the alternatively spliced exon and corresponds to a 55 kDa protein, which shares 97% identity with mouse PCTAIRE-1. Among the conserved features in the protein sequence are the ATP binding site (172-177), the PCTAIRE domain (205-211), the kinase domain (286-291), and three stretches of basic residues at 5-8 (KKIK), 107-110 (RKIS) and 147-150 (RRLR) in the N-terminal end, which resemble the consensus nuclear localization signal KR/KXR/K (Chelsky et al., 1989). In the PCTAIRE-1 mRNA containing the alternatively spliced exon, the open reading frame initiated at 251 is interrupted by a termination codon at 479 (Fig. 1). Consequently, the longest open reading in this mRNA extends from 487 to 1869 and corresponds to a 52-kDa protein. Amino acids 33-461 of this protein are identical to amino acids 68-496 of the 55-kDa protein, but the two predicted amino acid sequences bear no similarity at their N-terminal ends. The unique N-terminus of the 52 kDa form of PCTAIRE-1 contains four tyrosine residues and a possible site for phosphorylation by proline directed kinases (TP) (Nigg, 1993).

J. Biol. Chem., Vol. 281, Issue 15, 9852-9858, April 14, 2006. Pctaire1 phosphorylates N-ethylmaleimide-sensitive fusion protein: implications in the regulation of its hexamerization and exocytosis. Liu Y, Cheng K, Gong K, Fu AK, Ip NY. Originally identified as a Cdc2-like kinase (1, 2), Pctaire1 is ubiquitously expressed in mammalian tissues and is particularly abundant in terminally differentiated cells such as postmitotic neurons (1–3). In contrast to classical Cdks,<sup>2</sup> which depend on cyclins for activation, Pctaire1 is not activated by cyclins. We have reported previously that Pctaire1 interacts with the Cdk5 activator p35, and phosphorylation by Cdk5/p35 enhances the kinase activity of Pctaire1 (4). An alternative regulatory mechanism to inhibit the activity of Pctaire1 through protein kinase A has also been proposed (5). Similar to Cdk5, Pctaire1 is not involved in the regulation of cell cycle progression (1, 3). To date, the precise functions of Pctaire1 remain elusive. Recent studies indicate that Pctaire1 regulates neurite outgrowth in Neuro-2A cells, whereby overexpression of the kinase-dead (KD) mutant of Pctaire1 leads to enhanced neurite outgrowth (5).

Pctaire1 activity can be regulated by Cdk5/p35, which is known to play a pivotal role in neurotransmission through the phosphorylation of various synaptic proteins (33–36). Although Cdk5 does not directly interact with or phosphorylate NSF *in vitro* (data not shown), Cdk5/p35 associates with Pctaire1 and regulates its activity. Our findings in the present study reveal that Pctaire1 not only interacts with NSF in adult rat brain but also with a number of synaptic proteins including components of the SNARE complex. It would therefore be interesting to examine whether Pctaire1 and Cdk5 exist as components of a large protein complex and together play an important role in phosphorylating a repertoire of protein substrates to ensure proper transmitter release from synaptic vesicles. The present study reveals a potential novel role of Pctaire1 phosphorylation in modulating NSF-mediated exocytosis. Recent studies of NSF function in regulated secretion suggest that NSF serves to prime synaptic vesicles and rearrange the SNARE complex for Ca<sup>2+</sup>-triggered fusion after docking. This rearrangement is required to maintain the readily releasable pool of synaptic vesicles (37–39), whereas regulation of NSF phosphorylation by Pctaire1 might modulate the regulated secretion. Further studies on Pctaire1 functions in neurotransmitter release might shed light on its roles in neurons during development.

Journal of Cell Science 115, 3479-3490 (2002)

Messenger RNAs encoding the 45-58 kDa PCTAIRE family of protein kinase subunits have been identified in frogs, mice and humans, and consist of two or three isoforms. The mRNAs for PCTAIRE-2 and 3 are found almost exclusively in the brain, whereas PCTAIRE-1 is located in both brain and testis of adult mice and rats (Hirose et al., 1997Go; Rhee and Wolgemuth, 1995Go). Unlike CDK1, which has only 10 residues before the Walker A motif, the PCTAIRE family have 127-198 residues in N-terminal extensions (Meyerson et al., 1992Go; Okuda et al., 1992Go). No cyclin partner has been identified for any of the PCTAIREs, and these extensions may play the role of an attached cyclin for these kinases, although they do not display obvious homology to known cyclin sequences. Although expression of the PCTAIREs is restricted to the brain and testis, our attention was aroused by the finding that high levels of expression occurred in a wide range of transformed and immortalised cell lines of epithelial origin (Charrasse et al., 1999Go; Hirose et al., 1997Go; Rhee and Wolgemuth, 1995Go). There is great uncertainty about the function of the PCTAIREs, some authors suggesting a role in the cell cycle (Charrasse et al., 1999Go), others in the differentiation of neurons or testicular

cells (Besset et al., 1999Go; Rhee and Wolgemuth, 1995Go). Equally, the natural substrate for this family of protein kinases is not known, but some investigators found that PCTAIRE-1, and PCTAIRE-2 could phosphorylate histone H1 (Hirose et al., 1997Go; Le Bouffant et al., 1998Go), whereas others only detected MBP phosphorylation (Besset et al., 1999Go; Rhee and Wolgemuth, 1995Go). The levels of kinase activity, compared to CDK1 or protein kinase A (PKA), are extremely low. This makes it difficult to be sure that the observed kinase activity is due to PCTAIRE, rather than traces of contaminating protein kinases.

## Dync1i2

Cytoplasmic dynein is the major microtubule minus end-directed motor protein of the cell; it is involved in many essential cellular processes such as membrane trafficking and mitosis. The cytoplasmic dynein complex is resolved on SDS-polyacrylamide gels into subunit polypeptides of ~530 (dynein heavy chains), ~74 (intermediate chains), ~53–59 (light intermediate chains), and ~10–14 kD (light chains). Since mammalian cytoplasmic dynein was first identified and characterized (Paschal et al., 1987), further understanding of the subunit complexity of cytoplasmic dyneins has emerged (for review see Vallee et al., 2004; Pfister et al., 2005). Only a single heavy chain gene has been identified for the initially described form of cytoplasmic dynein, but two intermediate chain and two light intermediate chain genes have been found (Mikami et al., 1993; Zhang et al., 1993; Gill et al., 1994; Hughes et al., 1995; Vaughan and Vallee, 1995). Three light chain families have been identified, which appear to be shared among some, but not all, cytoplasmic and axonemal dynein complexes (King et al., 1996a,b, 1998; Bowman et al., 1999; Wilson et al., 2001).

*Science*. 2003 May 2;300(5620):808-12. Mutations in dynein link motor neuron degeneration to defects in retrograde transport. Hafezparast M, Klocke R, Ruhrberg C, Marquardt A, Ahmad-Annuar A, Bowen S, Lalli G, Witherden AS, Hummerich H, Nicholson S, Morgan PJ, Oozageer R, Priestley JV, Averill S, King VR, Ball S, Peters J, Toda T, Yamamoto A, Hiraoka Y, Augustin M, Korthaus D, Wattler S, Wabnitz P, Dickneite C, Lampel S, Boehme F, Peraus G, Popp A, Rudelius M, Schlegel J, Fuchs H, Hrabe de Angelis M, Schiavo G, Shima DT, Russ AP, Stumm G, Martin JE, Fisher EM. Degenerative disorders of motor neurons include a range of progressive fatal diseases such as amyotrophic lateral sclerosis (ALS), spinal-bulbar muscular atrophy (SBMA), and spinal muscular atrophy (SMA). Although the causative genetic alterations are known for some cases, the molecular basis of many SMA and SBMA-like syndromes and most ALS cases is unknown. Here we show that missense point mutations in the cytoplasmic dynein heavy chain result in progressive motor neuron degeneration in heterozygous mice, and in homozygotes this is accompanied by the formation of Lewy-like inclusion bodies, thus resembling key features of human pathology. These mutations exclusively perturb neuron-specific functions of dynein.

*Genomics*. 1999 Feb 1;55(3):257-67. Cloning and characterization of two cytoplasmic dynein intermediate chain genes in mouse and human. Crackower MA, Sinasac DS, Xia J, Motoyama J, Prochazka M, Rommens JM, Scherer SW, Tsui LC. Three of the eight isolated cDNA clones characterized did not include nucleotides 411–461 of the consensus sequence, which would translate into an open reading frame of 628 amino acids, suggesting the presence of alternative splicing (Fig. 3A). For discussion we

will refer to the larger transcript as *DNCIIA* and the smaller alternative transcript as *DNCIIC*. It appeared that the alternatively spliced *DNCIIC* transcript arose as a result of a cryptic splice-acceptor site located within exon 4 (Figs. 2 and 3A).

we chose to identify the equivalent mouse gene by low-stringency hybridization screening of a mouse embryonic cDNA library and a mouse adult brain cDNA library. The *Dncil* gene was identified from the adult brain cDNA library, and DNA sequence analysis revealed a composite cDNA sequence of 2586 bp with a putative open reading frame of 628 amino acids (Fig. 3B). This isoform was most similar to *DNCIIC* from human and thus named accordingly. *Dncilc* was found to be 97 and 98% identical at the amino acid level to the human and rat orthologues, respectively. Sequence analysis also identified a second isoform of *Dncil* (tentatively named *Dncile*) in which amino acids 106–125 of *Dncilc* were absent (Fig. 3A). Alternative splicing at this same position had also been reported for the rat orthologue (Paschal *et al.*, 1992). To determine whether additional splice variants similar to those found in rat and human are also present in mice, RT-PCR was performed with adult mouse brain RNA where the region of alternative splicing was amplified. The presence of four mouse brain *Dncil* isoforms was identified, with varying contribution (Fig. 4A). Sequence analyses of these bands showed that the predominant species was isoform *Dncilc*. In addition, *Dncile* was present. As expected, a splice variant homologous to *Dncila* was found, but in a relatively small amount (Figs. 3A and 4A); however, isoform *Dncilb* was not present in mouse brain. The fourth isoform present from mouse brain, *Dncild*, was found to be a novel isoform not previously described (Figs. 3A and 4A). Alternative splicing has been reported for both *Dncil* and *Dnci2* in rat (Paschal *et al.*, 1992; Vaughan and Vallee, 1995).

In this study we have identified several alternatively spliced isoforms for both human and mouse *DNCII*. The regions of alternative splicing found in both mouse and human were highly similar to that reported for rat. On the other hand, novel isoforms not reported in rat were found in human, mouse, or both. The differences in identified isoforms likely reflects the methodology employed or the tissue source analyzed. Nevertheless, rat isoform *Dncib* was not found in human or mouse even following RT-PCR analysis. In this case RT-PCR was performed on mouse brain RNA, the same tissue used for rat gene identification (Paschal *et al.*, 1992). Thus, it would seem that *Dncilb* may be specific to the rat brain. The alternative splicing in human *DNCII* is probably the result of a cryptic splice site within exon 4. The same splice isoform was identified in mouse and is likely a result of a similar cryptic splice site. In addition, based on the human genomic structure of *DNCII*, it is likely that mouse *Dncild* is the result of the utilization of a second cryptic splice-acceptor site in mouse exon 4. It would be necessary, however, to determine the genomic structure of mouse *Dncil* to confirm this.

## Figure and Table Titles and Legends

Figure S1. Increased Expression of CD45RA and RC on Diverse Leukocytes in thunder Mice

Figure S2. A Cell-Autonomous Role for hnRNPLL Controlling Peripheral T Cell Longevity

Figure S3. Normal Proliferation and Differentiation of *thunder* T Cells

Figure S4. List of Genes in Thunder Chromosomal Interval

Figure S5. *Hnrpll* Expression Pattern in Different Lymphocyte Subsets and Tissues

Figure S6. NMR Spectra of HnRNPLL RRM1 Domain (A-D) <sup>15</sup>N-HSQC spectra of wildtype and mutant RRM1 in absence (A, B) and presence of ARS RNA (C, D). (E) <sup>15</sup>N-HSQC spectra of wild-type RRM1 in presence of mutant ARS RNA. (F) Rosetta all-atom energy of all structures calculated versus the C<sup>α</sup> root mean square deviation (r.m.s.d.) from the structure with the lowest energy. (G) Stereoviews of lowest-energy structure from CSRosetta superimposed on 1WEX and 1SJQ structures, and primary sequence comparison of RRM1 domains of hnRNPLL and PTB1.

Figure S7. Chemical-Shift Changes of Backbone Amide Protons versus Amino Acid Sequence

Figure S8. Isothermal Calorimetry Data

Figure S9. Group A Gene Views in Alphabetical Order

Figure S10. Group B Gene Views in Alphabetical Order

Figure S11. Group C Gene Views in Alphabetical Order

Figure S12. Group D Gene Views in Alphabetical Order

Figure S13. Group E Gene Views in Alphabetical Order

Figure S14. Group F Gene Views in Alphabetical Order

Figure S15. Gene Views for CD44 and Stat5a

Table S1. False Discovery Rates for Specific Cell-Type Comparisons

Table S2. Data for Group A Genes

Table S3. Data for Group B Genes

Table S4. Data for Group C Genes

Table S5. Data for Group D Genes

Table S6. Data for Group E Genes

Table S7. Data for Group F Genes

Table S8. Data for Highest-Ranked Genes in Wild-Type Memory CD4 and CD8 Cells

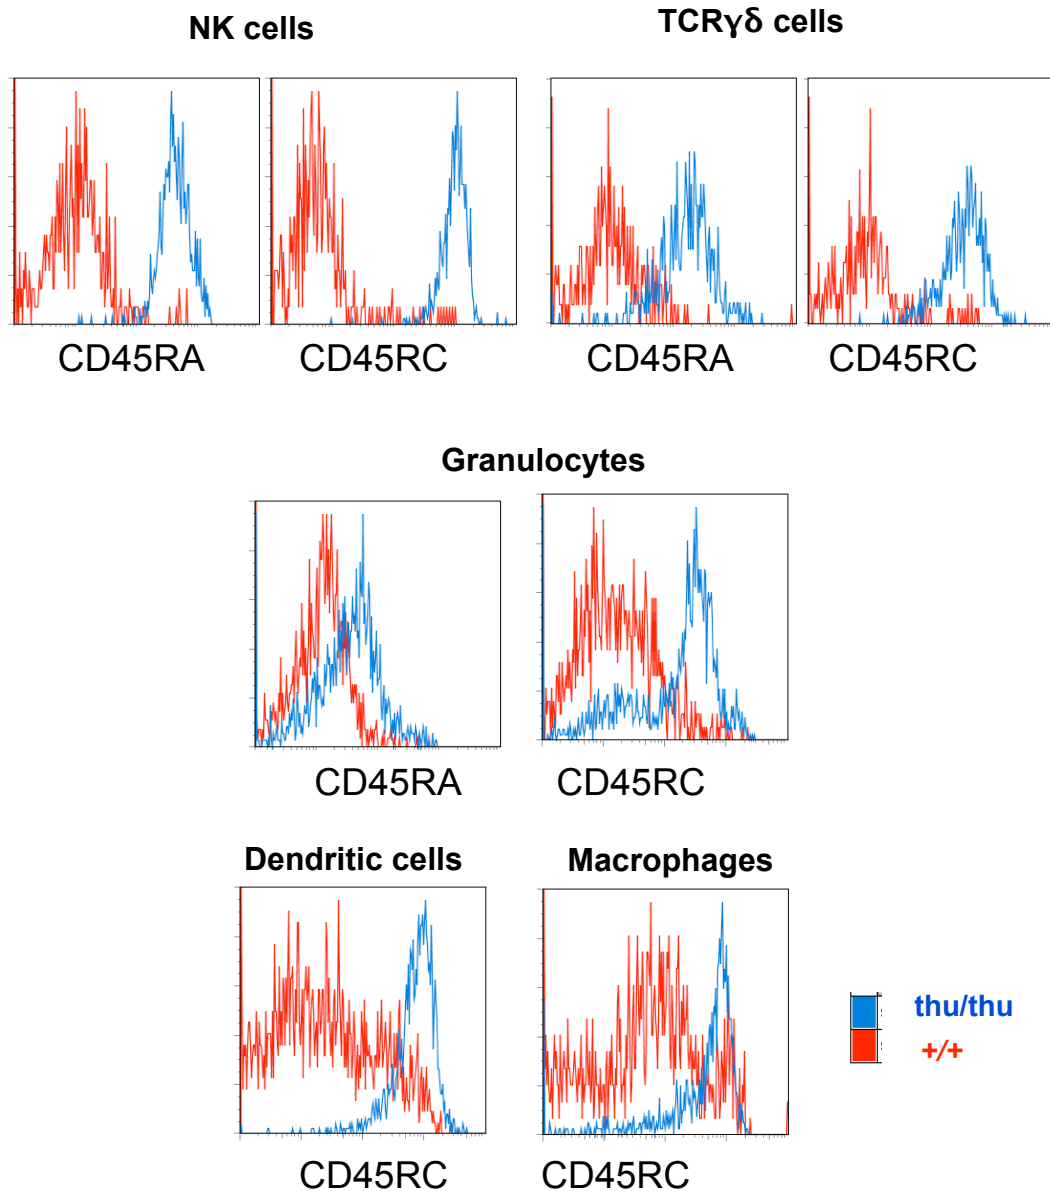

Supplementary Figure 1. The *thunder* mutation disrupts silencing of CD45RA and RC in numerous cell types.

Representative histograms comparing CD45RA and CD45RC expression on NK and TCR $\gamma\delta$  cells in the thymus, and on Gr-1<sup>+</sup> granulocytes, CD11c<sup>+</sup> dendritic cells, and CD11b<sup>+</sup> macrophages in the spleen. (red lines = *+/+* cells, blue line=*th/thu* cells)

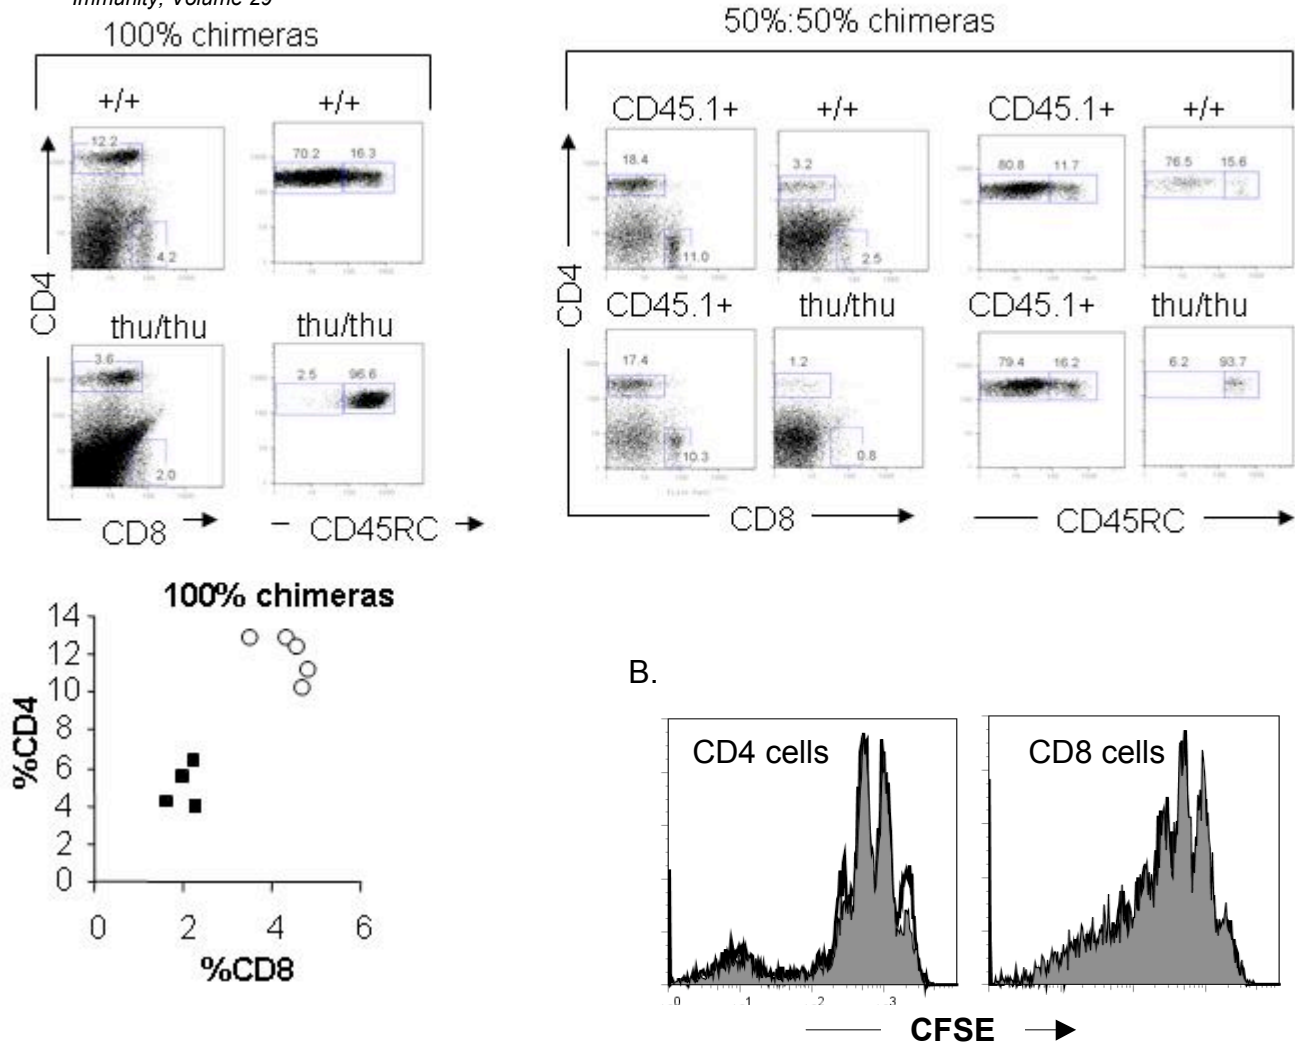

**Supplementary Figure 2. A cell autonomous role for hnRNPLL is controlling peripheral T cell longevity.** A. Bone marrow chimeras were prepared by injecting 100% wild type CD45.2+ cells or 100% *thu/thu* T depleted bone marrow cells into an irradiated CD45.1+ recipient. (left hand panel). Alternatively mixed bone marrow chimeras were prepared with 50:50 mixture of CD45.1+ wild type and CD45.2 wild type bone marrow cells, or a 50:50 mixture of CD45.1+ and CD45.2+ *thu/thu* bone marrow cells. Mice were analysed 12 weeks after the transfer and stained for CD4, CD8 CD45.1, CD45.2 and CD45RC. Representative FACS dot plots are shown for the 100% and 50:50 mixed chimeras. Wild type CD45.2+ cells (open circles) and *thu/thu* CD45.2+ (black squares).

B. Representative FACS histograms of CFSE staining of donor CD4+ and CD8+ T cells from irradiated C57BL/6J mice injected with a 50:50 mix of CFSE labelled wild type CD45.1+ and CD45.2 *thu/thu* thymocytes. Data shows an over lay of wild type cells (line) and *thu/thu* cells (filled histogram).



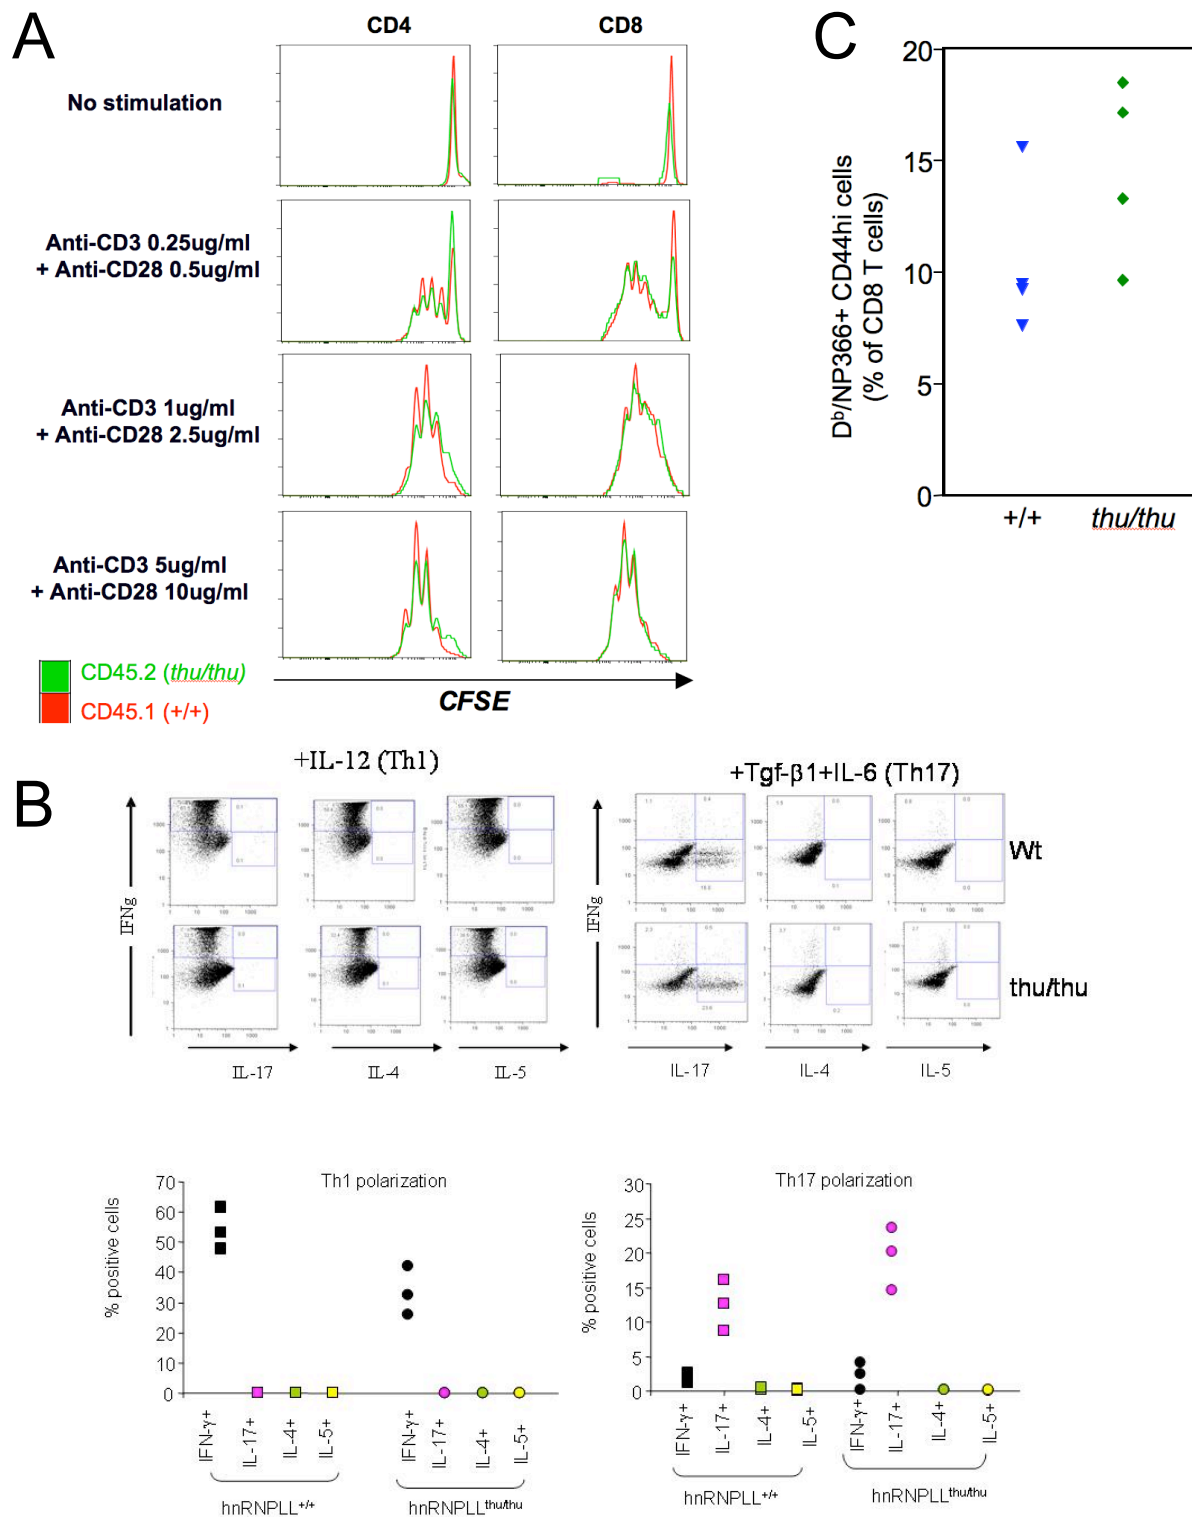

**Supp Figure 3. Normal proliferation and differentiation of *thunder* T cells.** **A.** Wild-type spleen cells bearing the CD45.1 marker were mixed in equal numbers with *thu/thu* spleen cells bearing the CD45.2 marker, labelled with CFSE, and the mixtures cultured in medium containing the indicated concentrations of anti-CD3 and anti-CD28 antibody and cell division compared between mutant and wildtype T cells on day 4 as shown on the overlay plots. **B.** Spleen cells from individual wild-type or *thunder* mice were cultured for 7 days with anti-CD3 & anti-CD28 antibodies plus 1ug/ml IL-12 or 1 ng/ml TGF $\beta$  & 10ng/ml IL-6. The cells were then restimulated for 5 hr with PMA and ionomycin in the presence of Golgi-stop, harvested, fixed & permeabilized, stained for intracellular cytokines, and analyzed by flow cytometry as shown. **C.** Wild-type or *thunder* mice were intraperitoneally injected with influenza viruses HKx31 (N3N2) on day 0 and PR8 (H1N1) on day 21. The CD8 T cell response to the dominant cross-reactive nucleoprotein (NP) epitope was enumerated in individual mice by flow cytometric staining with influenza NP366/D<sup>p</sup> tetramers in blood collected on day 28.

|    | Gene ID        | CDS (bp)    | Transcripts | Description                                                               |
|----|----------------|-------------|-------------|---------------------------------------------------------------------------|
| 1  | Arl6ip2        | 2842        | 2           | ADP-ribosylation factor-like 6 interacting protein 2 (nucleotide binding) |
| 2  | UNKNOWN        |             | 1           |                                                                           |
| 3  | UNKNOWN        |             | 1           |                                                                           |
| 4  | <b>Hnrpl1</b>  | 3002        | 1           | <b>heterogeneous nuclear ribonucleoprotein L-like</b>                     |
| 5  | Galm           | 2245        | 1           | galactose mutarotase                                                      |
| 6  | <b>Sfrs7</b>   | <b>2272</b> | <b>3</b>    | <b>splicing factor, arginine/serine-rich 7</b>                            |
| 7  | 4930560E09Rik  |             | 1           | PREDICTED: hypothetical protein LOC67737                                  |
| 8  | <b>Gemin6</b>  | <b>1086</b> | <b>1</b>    | <b>gem (nuclear organelle) associated protein 6</b>                       |
| 9  | AW494914       | 4101        | 3           | expressed sequence AW494914 (ATP dependent RNA helicase)                  |
| 10 | Mopt           | 647         | 2           | protein containing single MORN motif in testis                            |
| 11 | Gm941          | 1207        | 1           | gene model 941, (NCBI)                                                    |
| 12 | Q8BSD7_MOUSE   | 324         | 1           | 12 days embryo embryonic body between diaphragm region and neck cDNA,     |
| 13 | Sos1           | 4747        | 1           | Son of sevenless homolog 1 (Drosophila)                                   |
| 14 | XP_355031.3    | 984         | 4           | PREDICTED: similar to cyclin-dependent kinase-like 4                      |
| 15 | Map4k3         | 3382        | 2           | mitogen-activated protein kinase kinase kinase kinase 3                   |
| 16 | UNKNOWN        |             |             |                                                                           |
| 17 | UNKNOWN        | 248         | 1           |                                                                           |
| 18 | 2810417M05Rik  | 1690        | 1           | <b>RIKEN</b> cDNA 2810417M05 gene                                         |
| 19 | <b>Thumpd2</b> | <b>1848</b> | <b>2</b>    | <b>THUMP domain containing 2</b>                                          |
| 20 | NM_178927.2    |             |             | expressed sequence AV344025 (AV344025), mRNA                              |
| 21 | Slc8a1         | 2823        | 4           | solute carrier family 8 (sodium/calcium exchanger), member 1              |

#### Supplementary Figure 4 The thunder locus located on distal Chromosome 17. 21

transcription units were identified in the minimal thunder interval defined by D17Mit42 (79.2Mbp) and the SNP 17-0802 (81.3Mbp). Genes shown in bold text have been implicated in RNA binding. *Sfrs7* is a splicing factor and hnRNPLL is a member of the hnRNP protein family which are implicated in alternative splicing of mRNA.

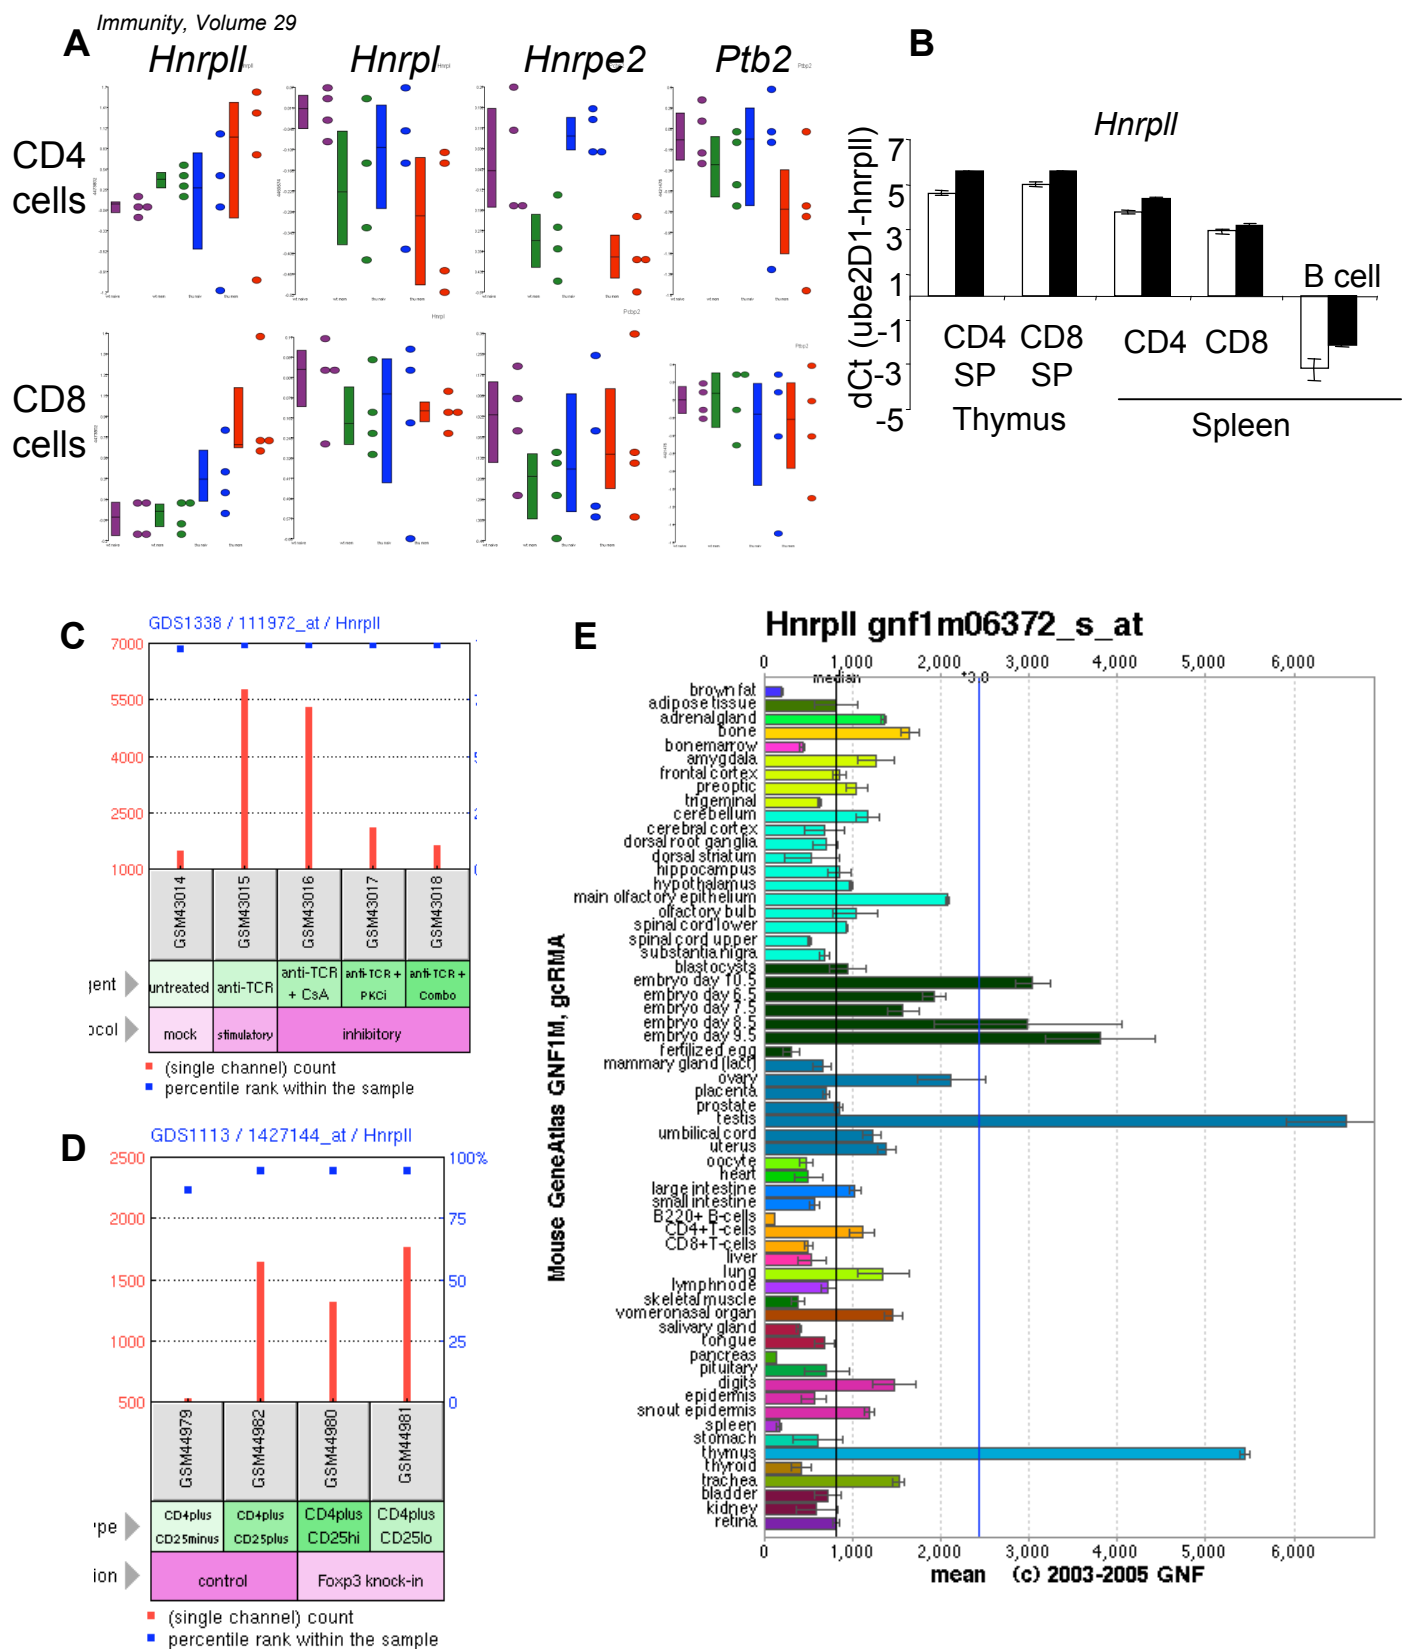

### Supplementary Figure 5. *hnRNPLL* gene expression pattern.

**a**, Relative mRNA abundance as determined from exon array data for various hnRNP mRNAs in CD4+ (top panels) and CD8+ (lower panels) T cells isolated from wild type naïve (purple circles), and memory (green circles) T cells and thunder naïve (blue circles) and memory (red circles) T cells. Each circle represents an independent sample for each genotype. **b**, Relative *Hnrpll* mRNA in T cells versus B cells measured by realtime PCR. Open bars, +/+; solid bars, *thl/thl*. **c**, Relative *Hnrpll* mRNA in unstimulated and stimulated AE.7 T cells (from GEO deposited array data GDS1338 of Safford M et al. 2005 *Nat Immunol* 6:472-80). **d**, Relative *Hnrpll* mRNA in CD4+25+ versus CD4+25- spleen T cells (from GEO deposited array data GDS1113 of Fontenot JD et al 2005 *Immunity* 22:329-41). **e**, The expression of hnRNPLL gene in multiple tissues as determined by GNF SymAtlas (Su AI et al. 2004. *Proc Natl Acad Sci U S A* 101:6062-7).

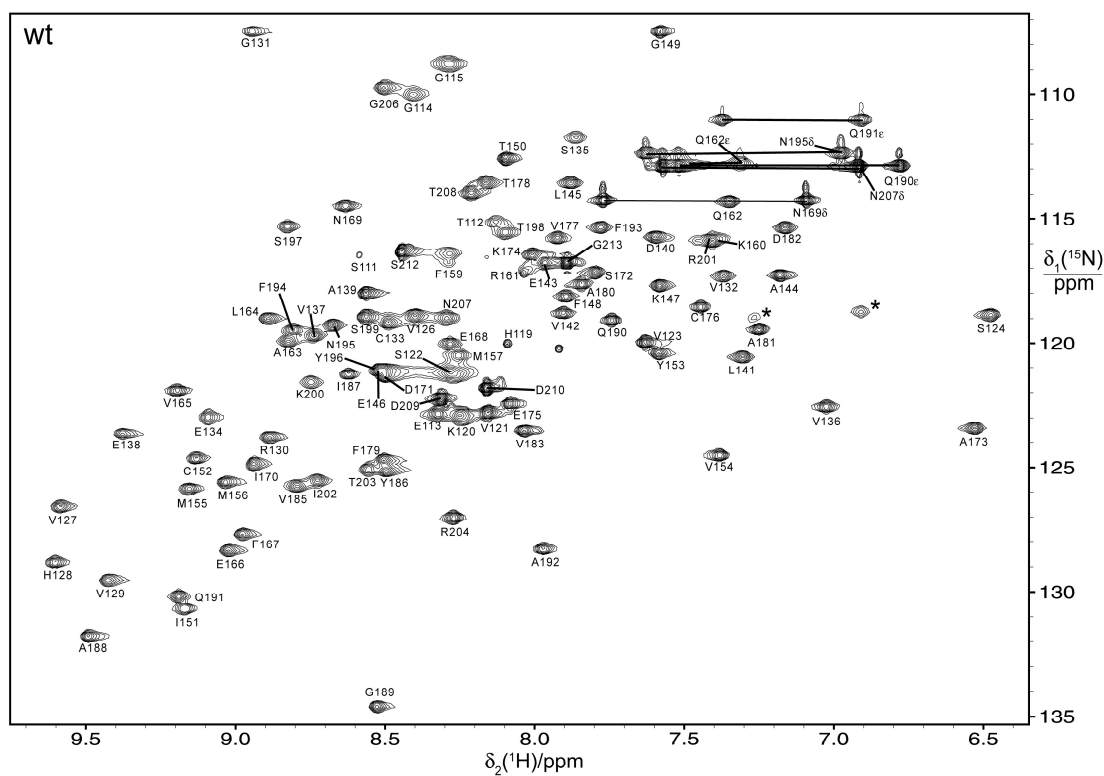

**Supp Fig 6A.**  $^{15}\text{N}$ -HSQC spectrum of a 0.8 mM solution of the wild-type RRM1 domain in NMR buffer at 25 °C. The cross-peaks of the backbone amides are assigned with the one-letter amino acid code and the sequence number of the residues. Horizontal lines connect pairs of cross-peaks from side-chain amides of Asn and Gln. Folded peaks from arginine side chains are labelled with a star. The amide cross-peak of Gly189 is folded from  $\delta_1(^{15}\text{N}) = 101.3$  ppm.

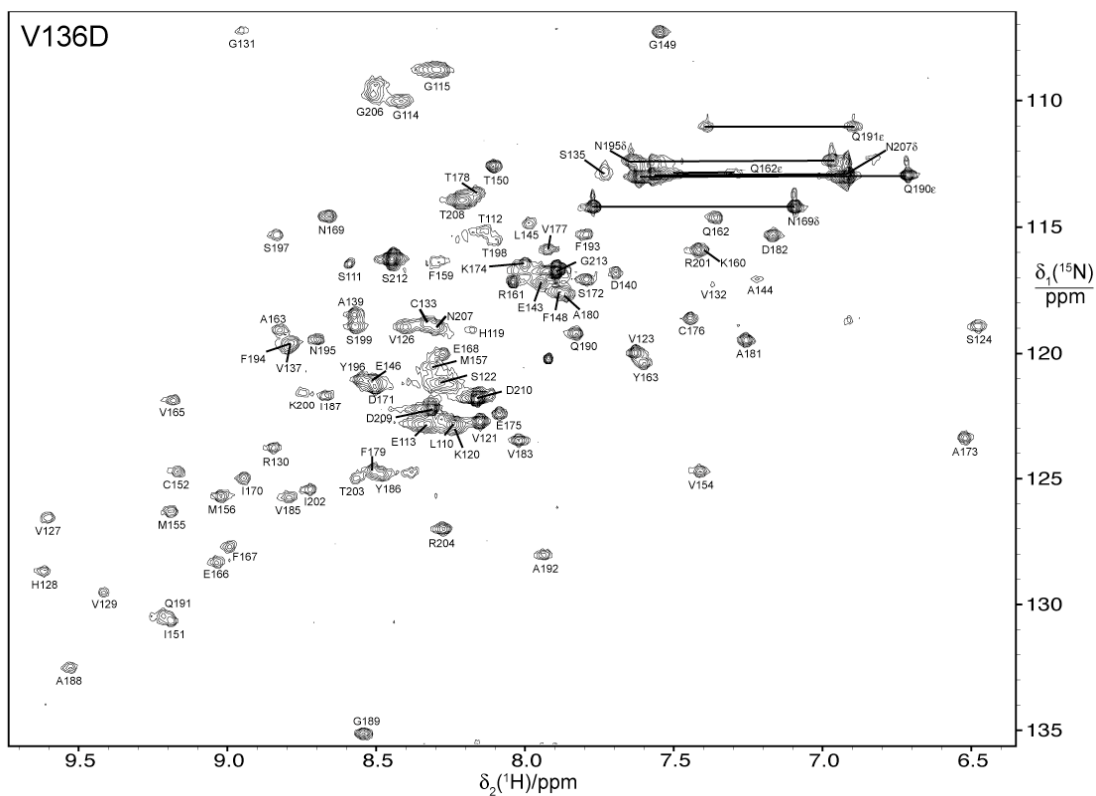

**Supp Fig 6B.** Same as Supp Fig 6A, but for the V136D mutant.

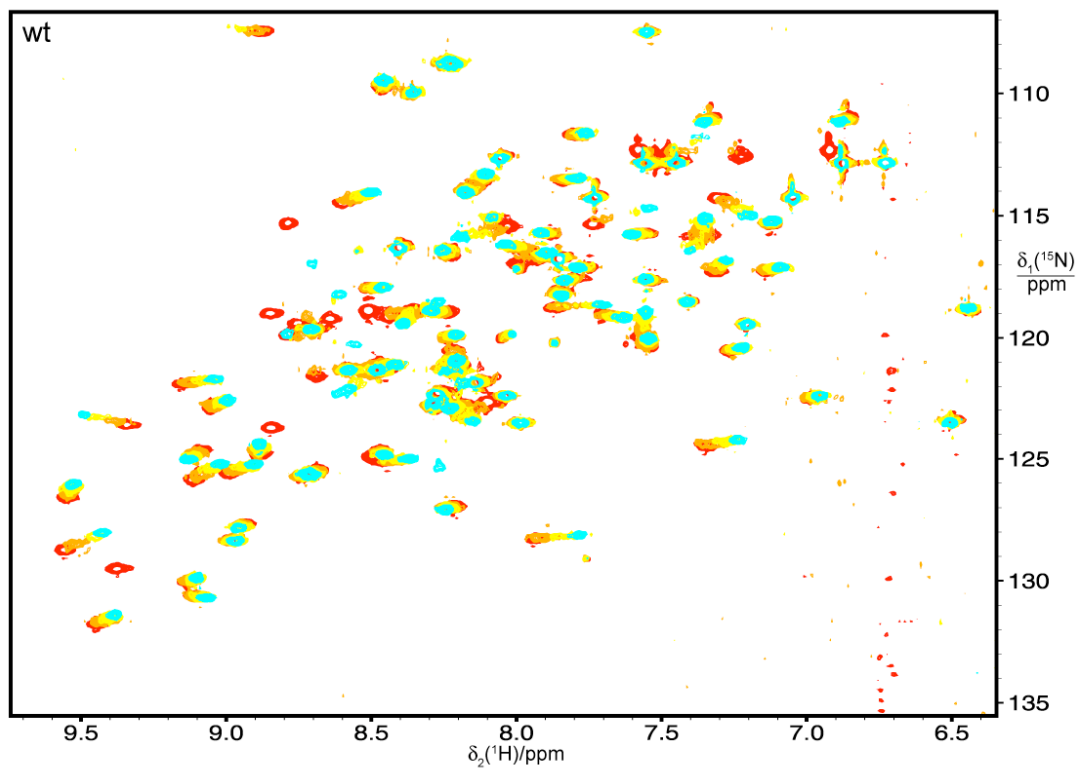

**Supp Fig 6C.** Superimposition of four  $^{15}\text{N}$ -HSQC spectra of uniformly  $^{15}\text{N}$ -labeled wild-type RRM1 in the presence of different amounts of RNA. The nucleotide sequence was 5'-CCUUACCUGCACGCA-3'. The spectra shown correspond to [protein]:[RNA] ratios of 1:0 (red), 1:0.3 (orange), 1:0.7 (yellow), and 1:1.5 (cyan). The gradual change in the peak positions confirms that the exchange between bound and free RNA is fast on the chemical shift time scale (milliseconds). The changes in chemical shifts as a function of titration ratio are plotted in Fig. 4C and D for selected peaks (see Supp Figs 6A and 6B for the resonance assignments).

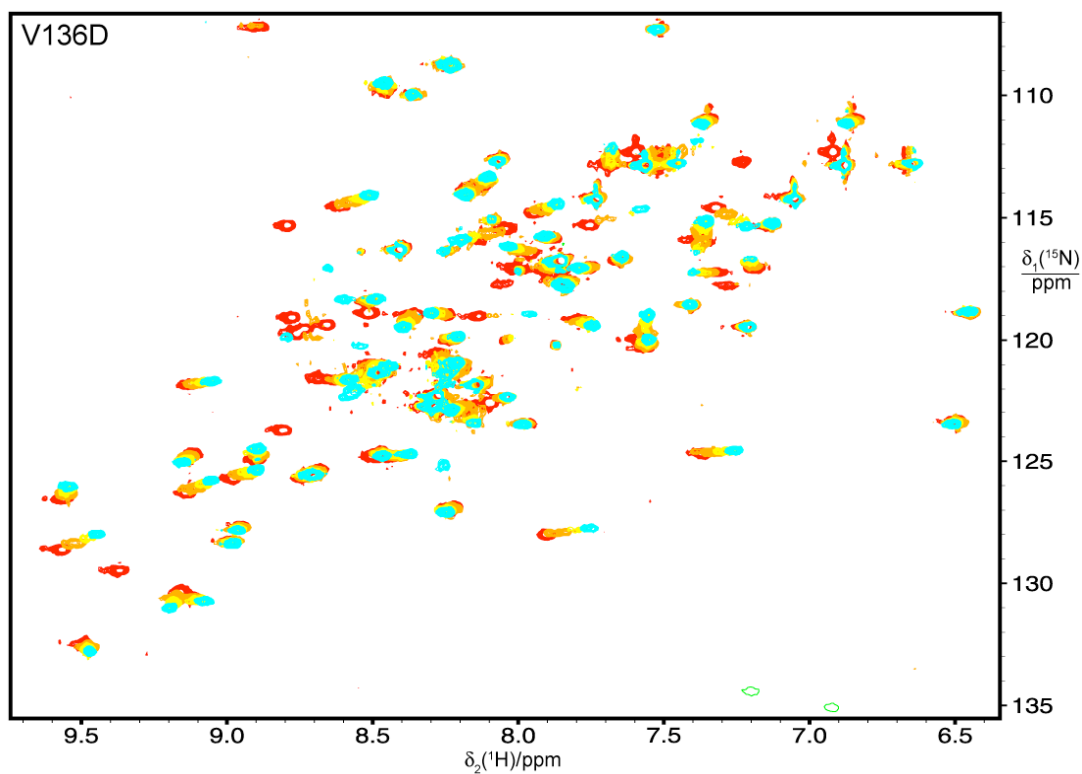

**Supp Fig 6D.** Same as Supp Fig 6C, but for the V136D mutant.

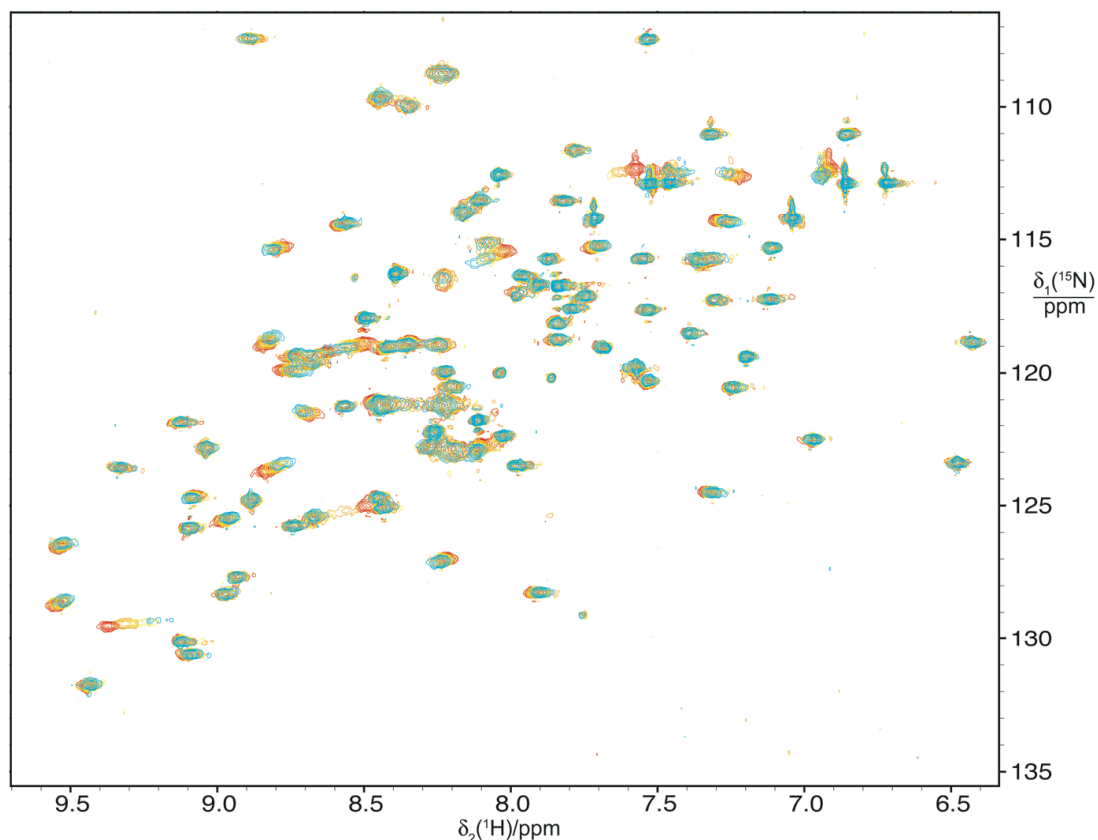

**Supp Fig 6E.** Same as Supp Fig 6C, except using the ARS mutant RNA oligonucleotide 5'-CCUUACCUGGACGUA-3'. The smaller shift changes and the greatly reduced number of shifted peaks suggesting that this RNA oligomer does not bind specifically. The dissociation constant derived from the shifted peaks was  $\sim 5$  times greater than for the RNA oligomer of Supp Fig 6C.

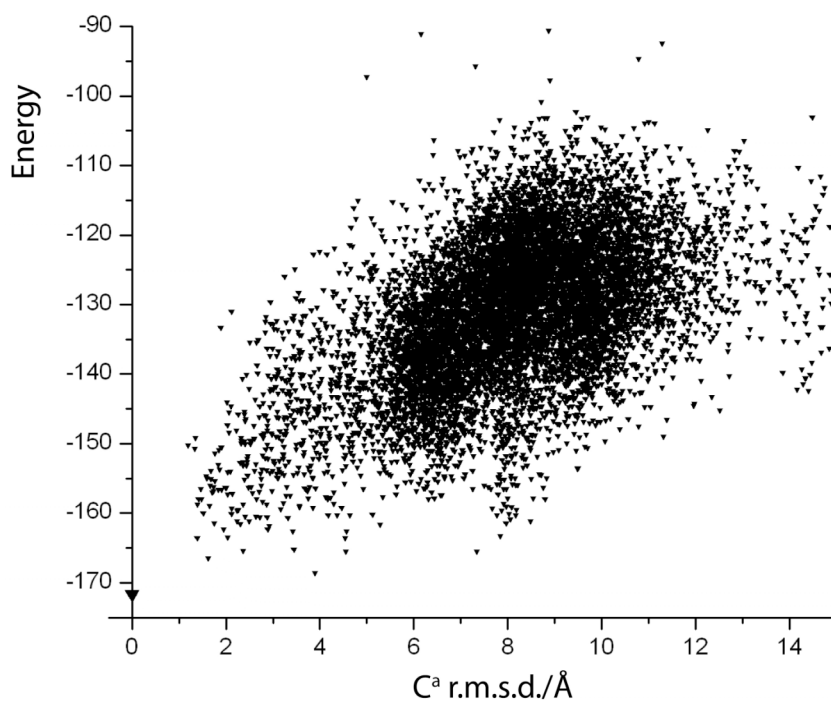

**Supp Fig 6F.** Rosetta all-atom energy of all structures calculated versus the  $C^\alpha$  root mean square deviation (r.m.s.d.) from the structure with the lowest energy. The structure with the lowest energy (residues 124-202) is shown in Figure 4A and B. All residues in this structure are in the allowed region of the Ramachandran plot, except for three residues which are in the additional allowed region. The correctness of the fold was verified by nuclear Overhauser effects (NOEs) that had not been used in the structure calculation. In particular, NOEs observed between the methyl groups of V136 and the side-chains of Leu134 and Leu143 confirmed that the side-chain of V136 is buried in the structure.

Comparison  
to 1WEX:

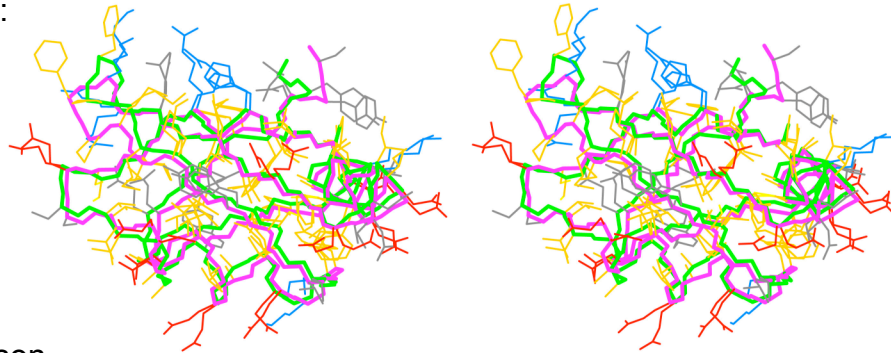

Comparison  
to 1SJQ:

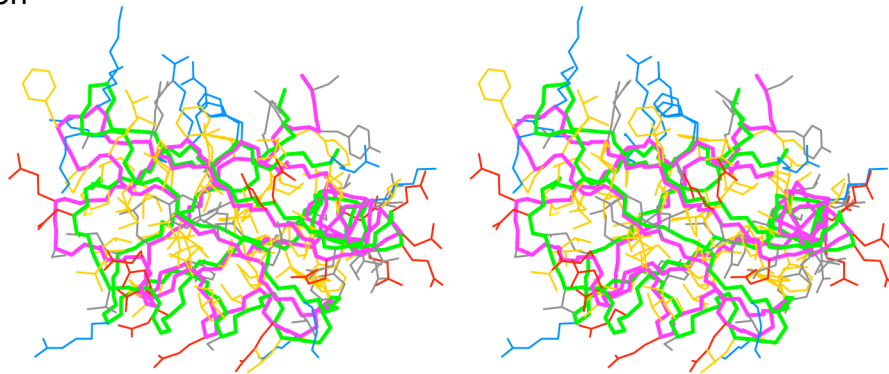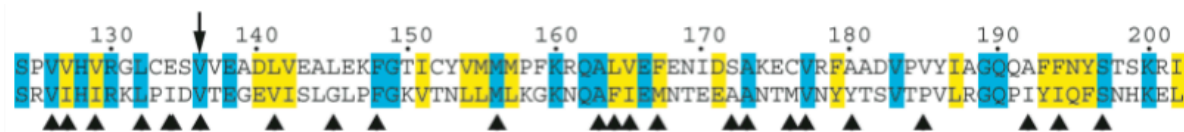

**Supp Fig 6G.**

**(Top)** Stereoview of a heavy-atom representation of the lowest-energy structure from CSRosetta (magenta backbone) superimposed on the first conformer of the structure determined by the RIKEN Structural Genomics/Proteomics Initiative (PDB ID: 1WEX; these coordinates have been deposited without supporting information and we cannot assess their reliability). The average pairwise backbone and heavy atom r.m.s.d.s are 1.0 and 2.0 Å, respectively, comparing residues 126-196 of the CSRosetta structure with all conformers of the 1WEX structure.

**(Middle)** Same as top, but comparing the CSRosetta structure with the first conformer of the PTB1 RRM1 domain structure (PDB ID: 1SJQ). The average pairwise backbone r.m.s.d. is 1.9 Å, comparing residues 126-196 of the CSRosetta structure with all conformers of the 1SJQ structure.

**(Bottom)** Amino acid sequence alignment of the hnRNPLL RRM1 domain at the top and the sequence of the PTB1 RRM1 domain below. Identical and similar residues are highlighted in cyan and yellow, respectively. The residue numbering of the hnRNPLL RRM1 domain is indicated. An arrow identifies the site of the thunder mutation. The location of buried side-chains with less than 11% solvent exposure is indicated for the PTB1 RRM1 domain by triangles below the sequence. Structural similarity between the hnRNPLL and PTB1 RRM1 domains can be inferred from the high sequence conservation (52% sequence similarity), the functional conservation as RNA-binding domains, the conservation of characteristic residues for RNA-binding (e.g., His128 and Gln162), and the fact that almost all residues with buried side-chains in the PTB1 RRM1 structure are hydrophobic in both proteins.

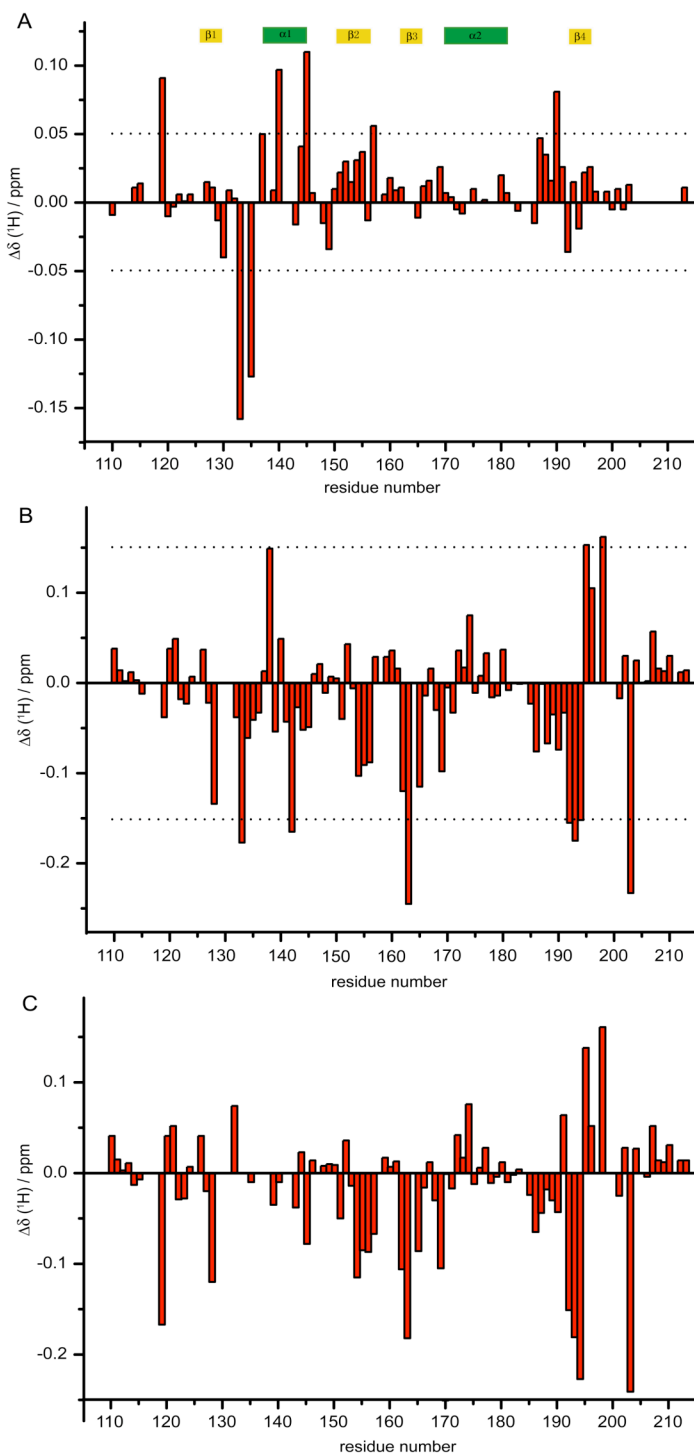

**Supp Figure 7.** Chemical shift changes of backbone amide protons versus amino-acid sequence. The chemical shifts are compared to those of the wild-type RRM1 domain. All amide protons of the wild-type protein (residues 110-213) were assigned, except for those of residues 116-118. The regular secondary structure elements are indicated at the top. The dotted lines indicate the cutoffs used to highlight amide protons with significant chemical shift changes in Figs. 3A and B. (A) Chemical shifts of the V136D mutant minus those of the wild-type protein. As for the wild-type protein, residues 116-118 could not be assigned. In addition, the  $^{15}\text{N}$ -HSQC cross-peaks of Glu134, Val136, Glu138, Leu141, Val142, Lys147 and Leu164 were broadened beyond detection. (B) Chemical shifts of the wild-type RRM1 domain in the presence of the 15-mer 5'-CCUUAACCUGCACGCA-3' (RNA:protein ratio of 2:1) minus those observed in the absence of 15-mer. In addition to the unassigned amides of residues 116-118, the  $^{15}\text{N}$ -HSQC cross-peaks of Val129, Arg130, Gly131, Leu164, Ser197, Ser199 and Lys200 were broadened beyond detection in the presence of 15-mer. The cross-peaks of the side-chain amides of Gln162 and Asn195 also disappeared in the presence of 15-mer. (C) Chemical shifts of the RRM1 V136D mutant in the presence minus those in the absence of the 15-mer (RNA:protein ratio of 2:1). In addition to the unassigned amides of residues 116-118, 134, 136, 138, 141, 142, 147 and 164, the  $^{15}\text{N}$ -HSQC cross-peaks of Val129, Arg130, Gly131, Val137, Ser197, Ser199, and Lys200 were broadened beyond detection in the presence of 15-mer. As in the case of the wild-type protein, also the cross-peaks of the side-chain amides of Gln162 and Asn195 disappeared in the presence of 15-mer. The similarity in chemical shift changes induced by the RNA in the wild-type and mutant RRM1 domain indicates a similar RNA binding mode.



## A: wild type

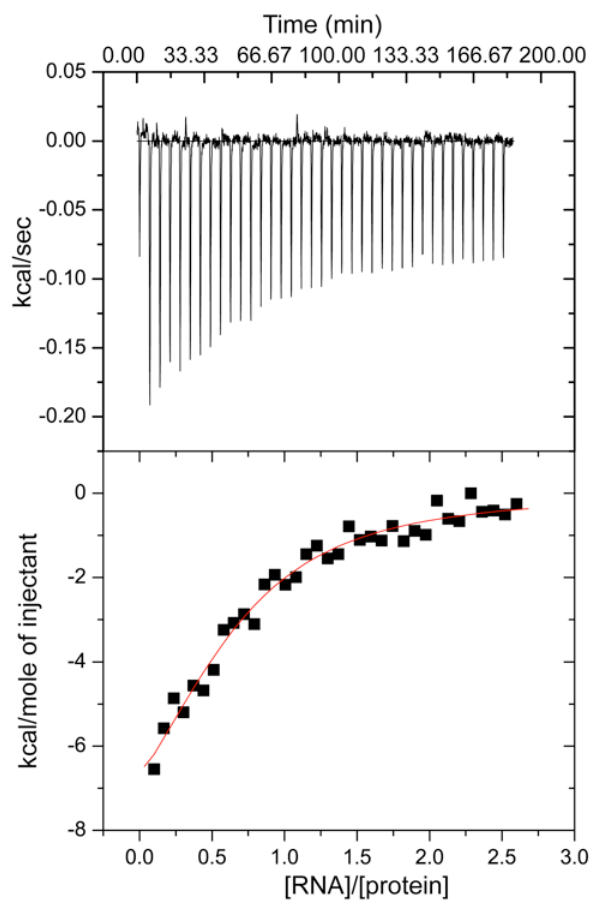

## B: V136D mutant

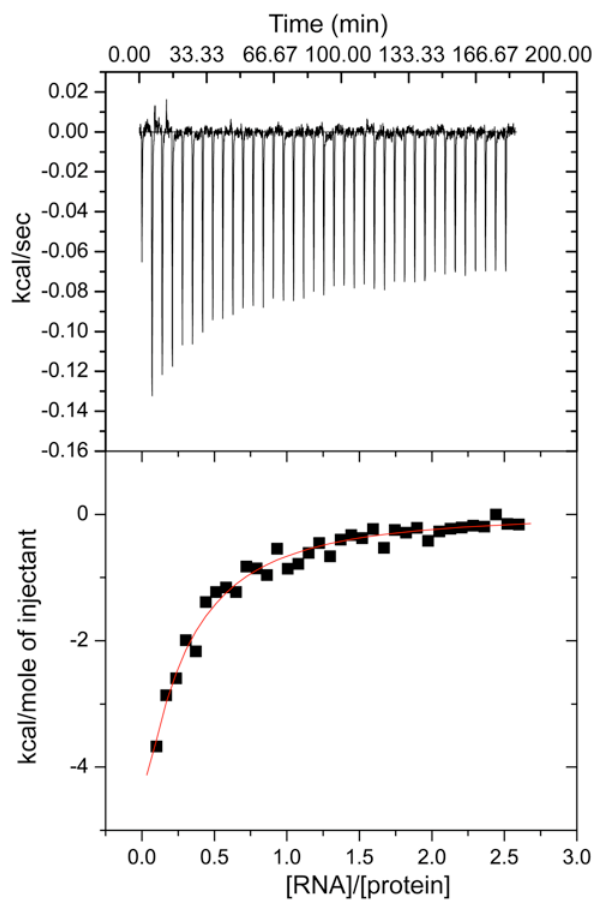

**Supp Fig 8.** ITC data recorded for titrations of wild-type (A) and mutant (B) RRM1 domains with the RNA oligomer 5'-CCUACCUGCACGCA-3' at 15 °C. Titration of the RNA into buffer generated significant heat effects which were subtracted from the titration data of the RRM1 domains in order to assess the binding affinity of the protein domains. The data of Fig. 3C and D were obtained by individual integration of each peak in order to minimize contributions from the baseline noise.

# Group A

## 1520401A03Rik exons and transcripts

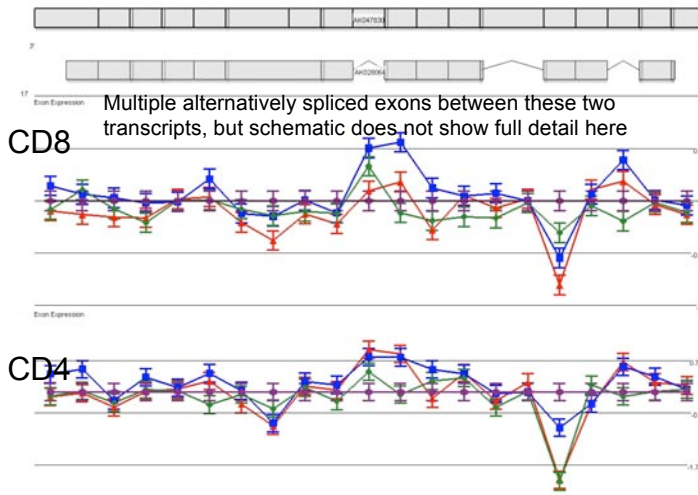

## Atp13a2

Alternative acceptor, changes frame ahead of predicted 9th & 10th TM

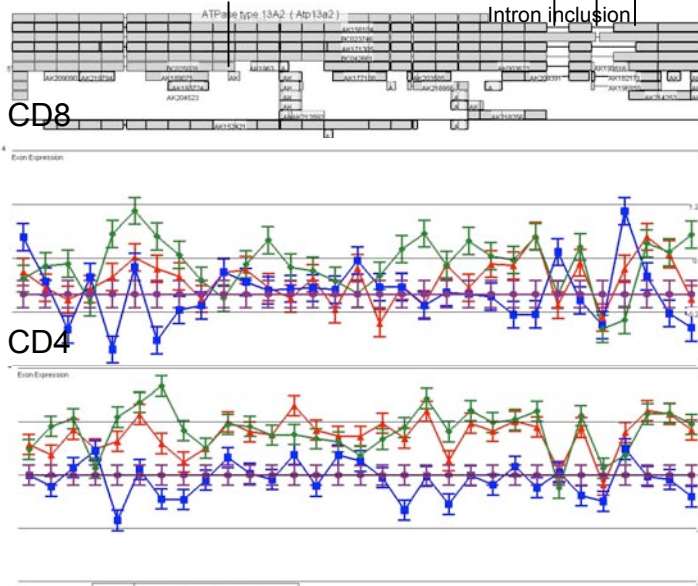

## Cadps2

Appears to be alternative starts to exon 1

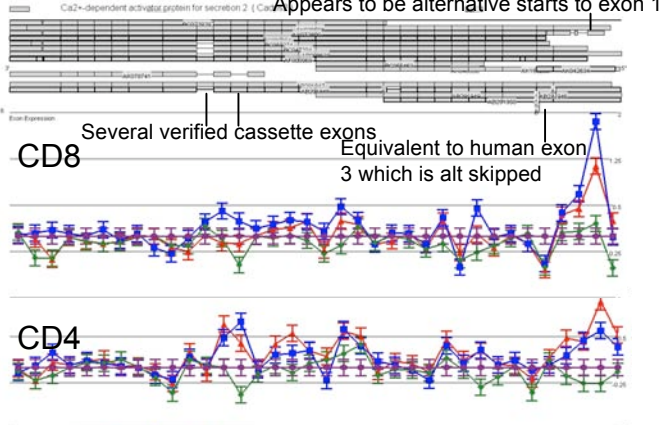

## Cobl

Cassette exon selectively skipped in multiple ESTs

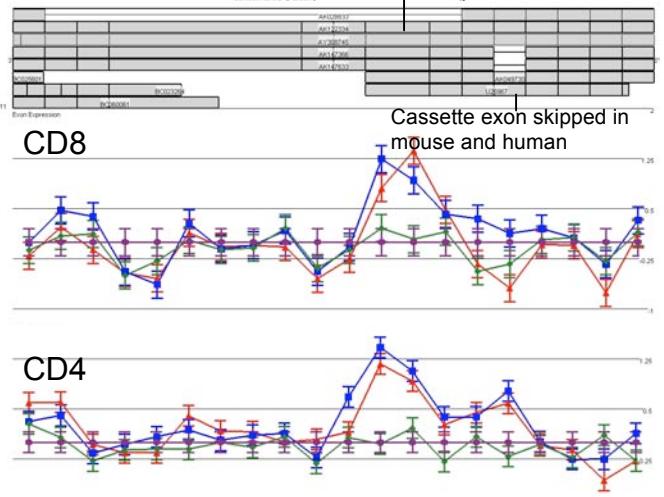

# Group A

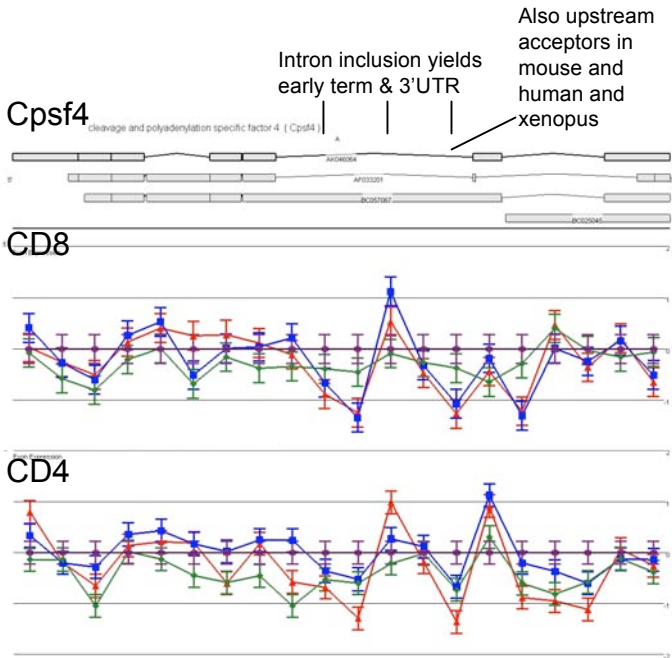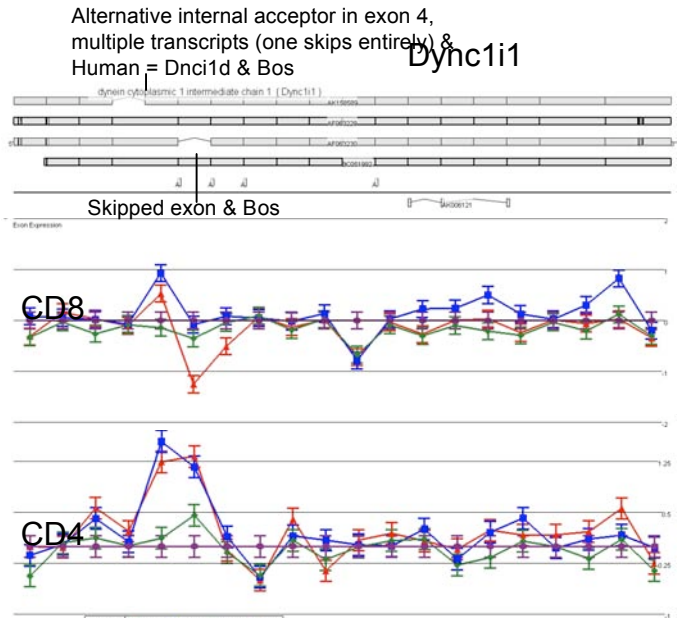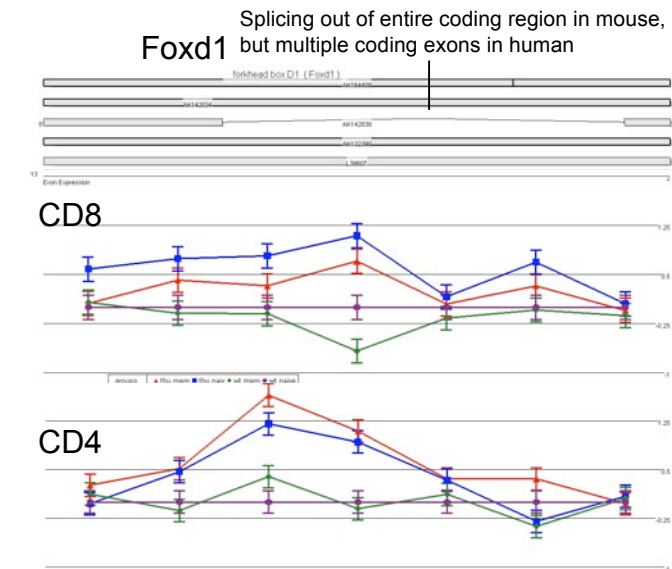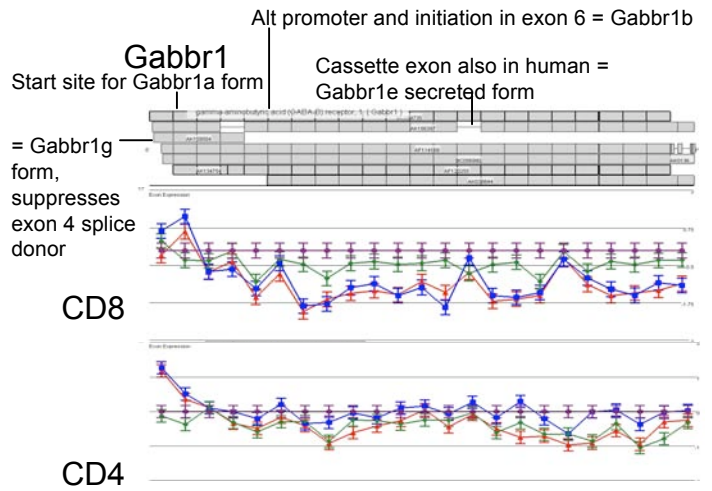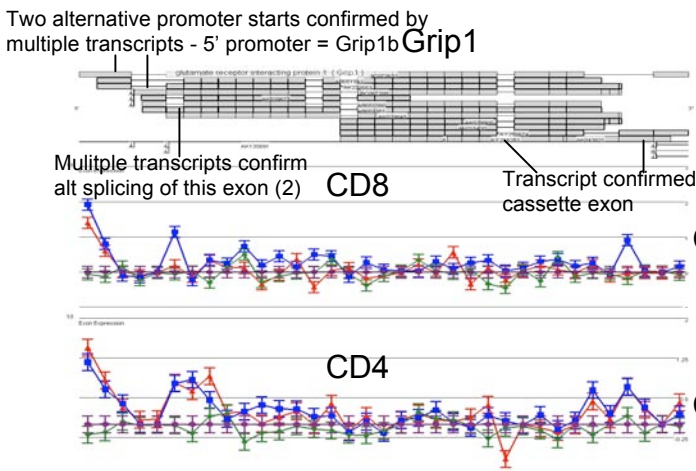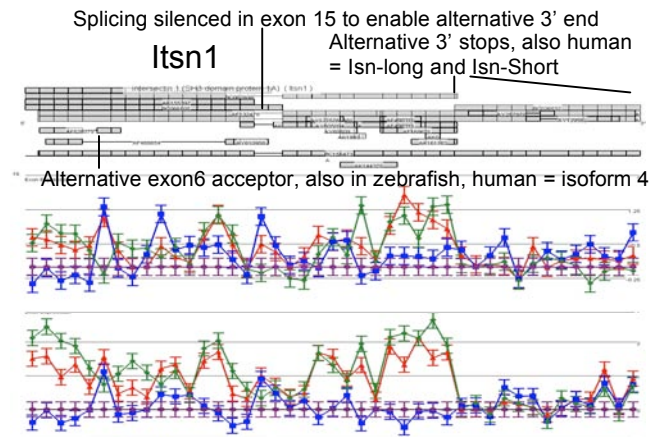

# Group A

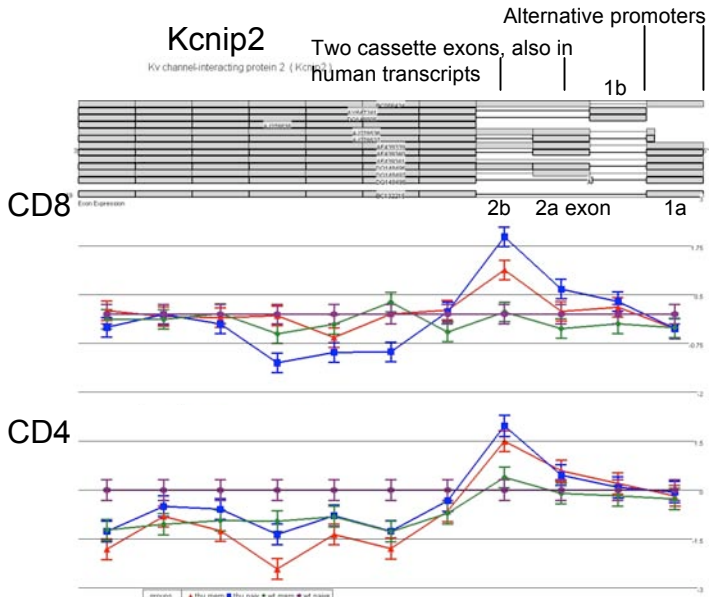

## Kif21a exons and transcripts

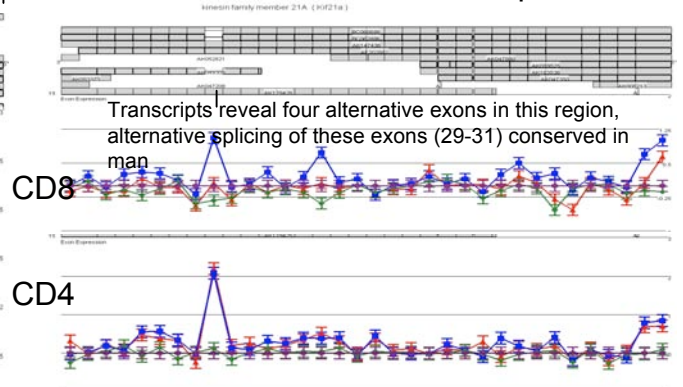

## Leng8 exons and transcripts

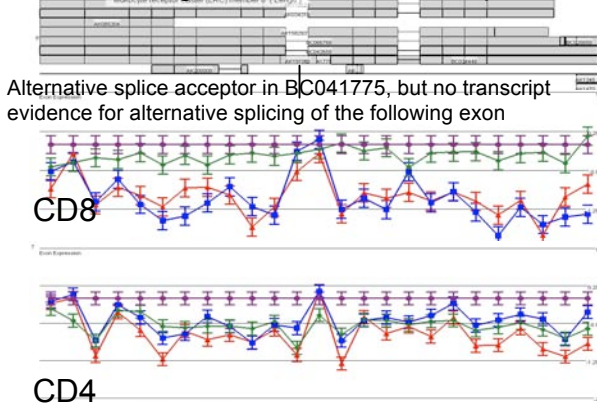

## Three alternative splice donors in exon 1, at least two conserved in human

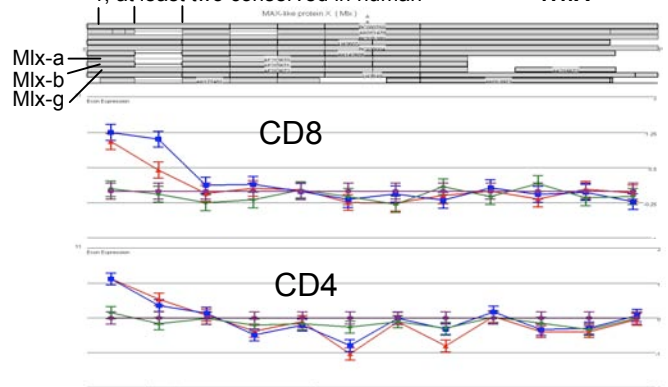

## Mus81

Alternative splice acceptor or entire skipping of 4th last exon in different transcripts, keeps frame, also in *Bos* and *Danio rerio*

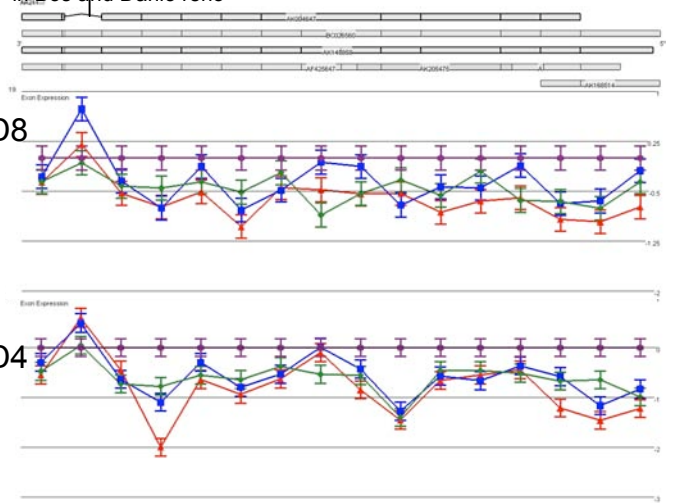

Alternative internal exon 4 resulting in termination, conserved in human & rat = encodes unique 102 aa of MOBP170 / rOPRP1

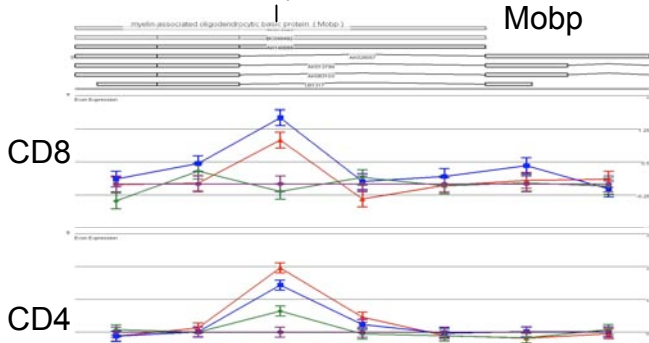

# Group A

## Nfatc1

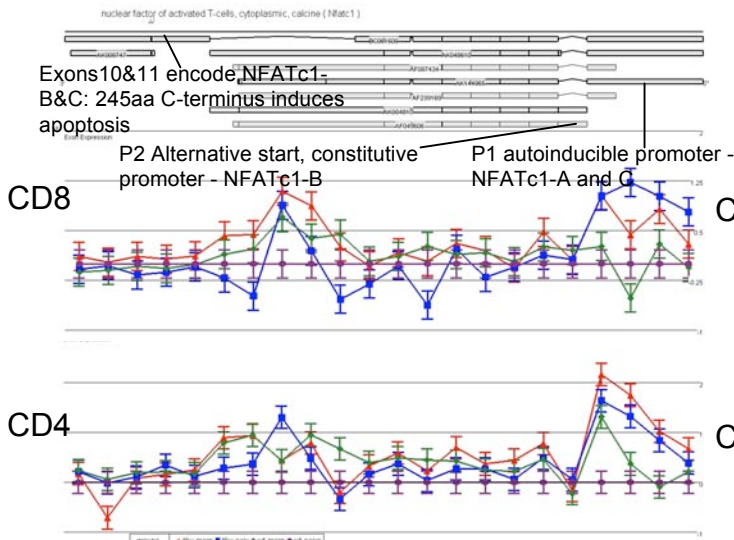

## Nphp4

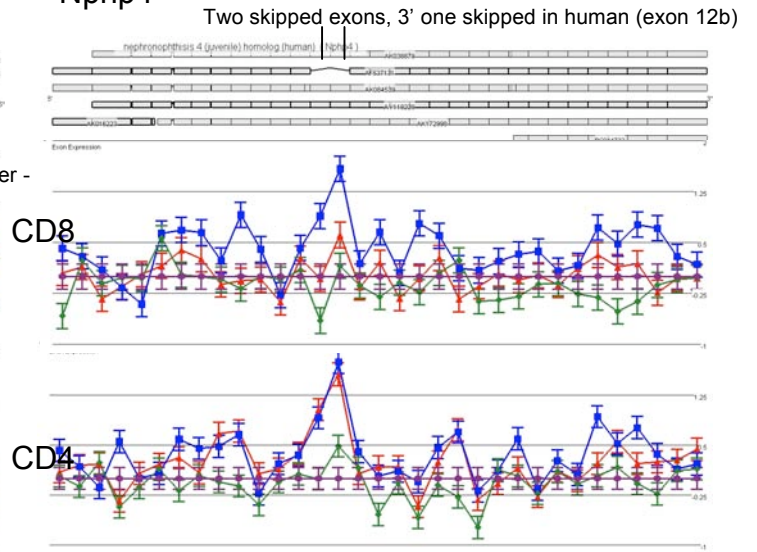

## Osbpl1a

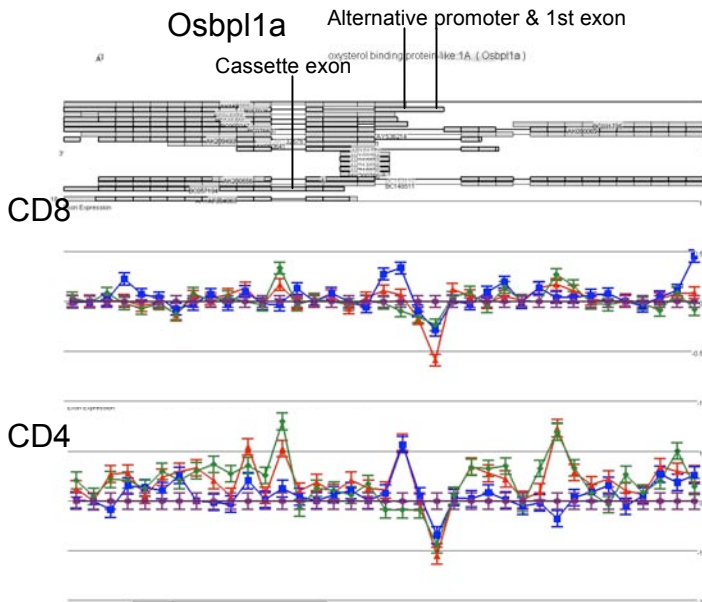

## Otof

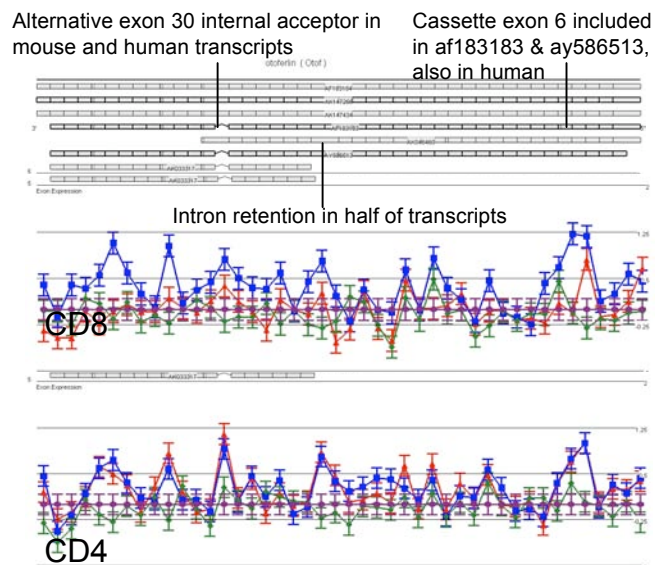

## Pctk1

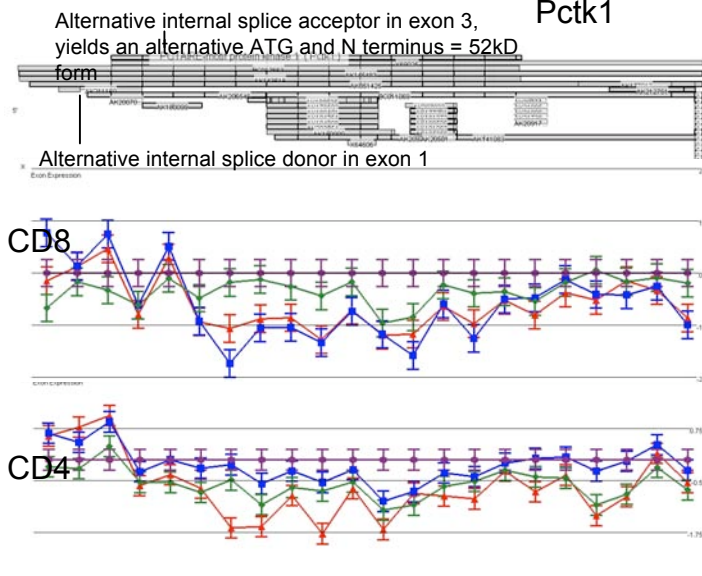

## LOC676275 = Pigw

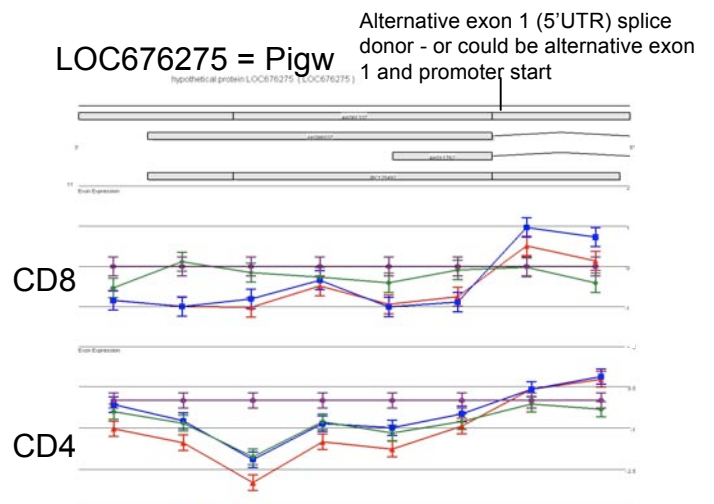

# Group A

Ptprc exons and transcripts

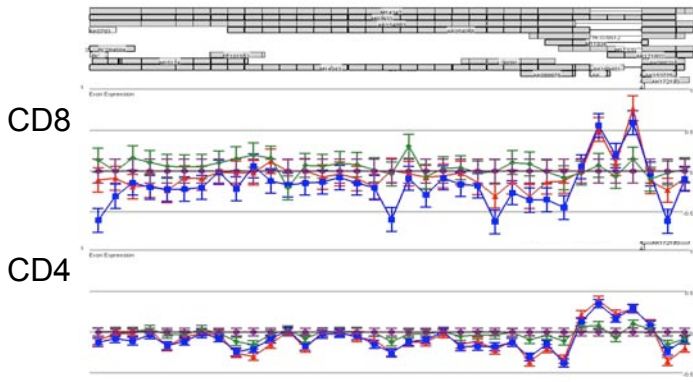

Splicing out of segment within 5'UTR of 2 transcripts in mouse, and in human exon 1 Ptprk

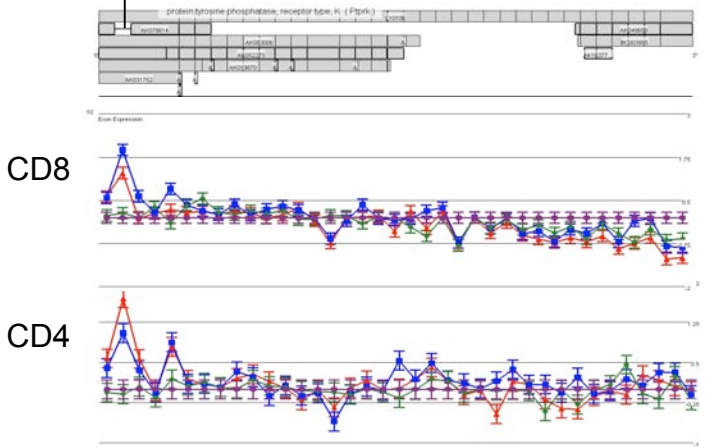

LOC666183 = Ptprt Two small introns also present in human

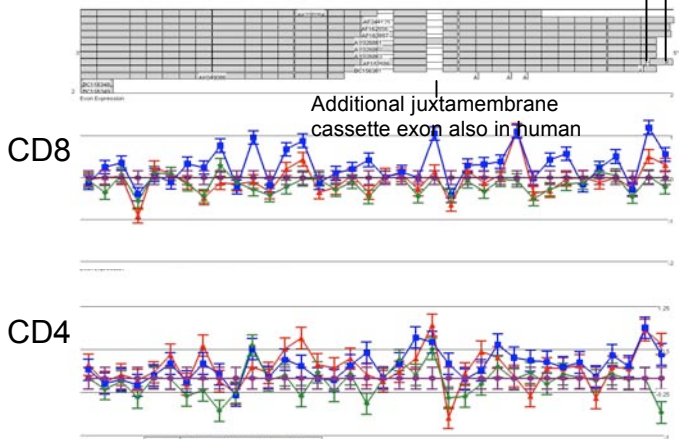

Rhbdfl

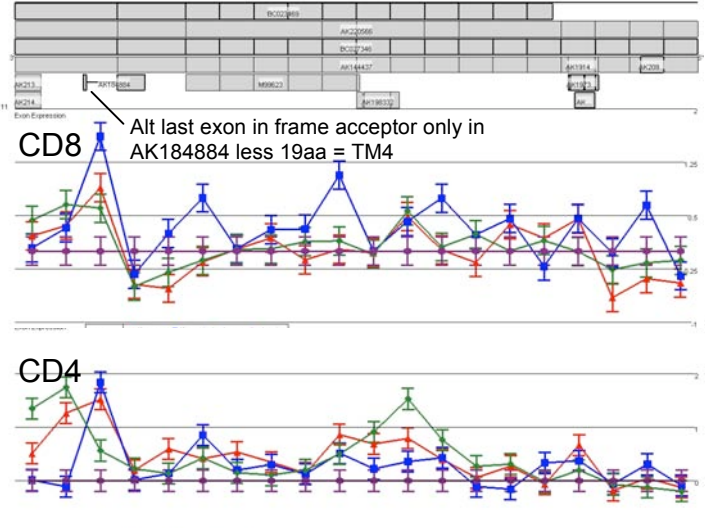

Alternative splice acceptor, multiple transcripts, results in methionine initiation at S6kb2 aa 291 in middle of catalytic domain, unless conventional exon 1 donor used and hence ATG in exon 1

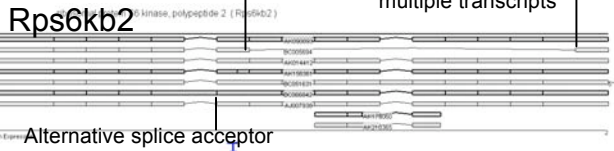

CD8

CD4

Scube3 Skipped exon, multiple transcripts

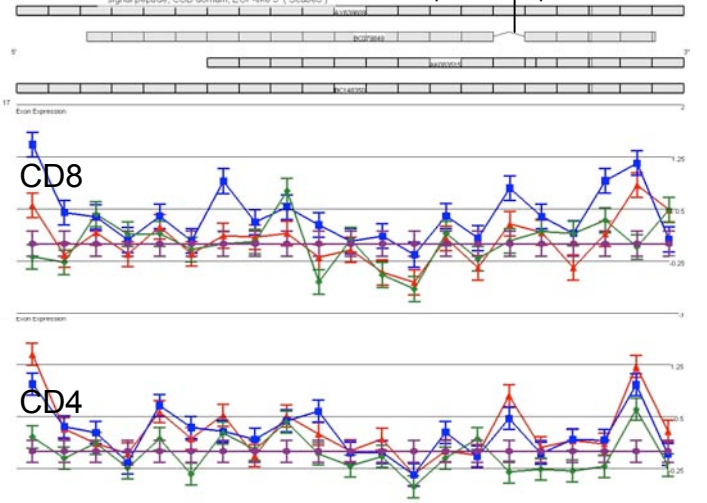

CD8

CD4

# Group A

9330158F14Rik = Homo SLC38A11  
Two alternative exons yield early termination and 3'UTR

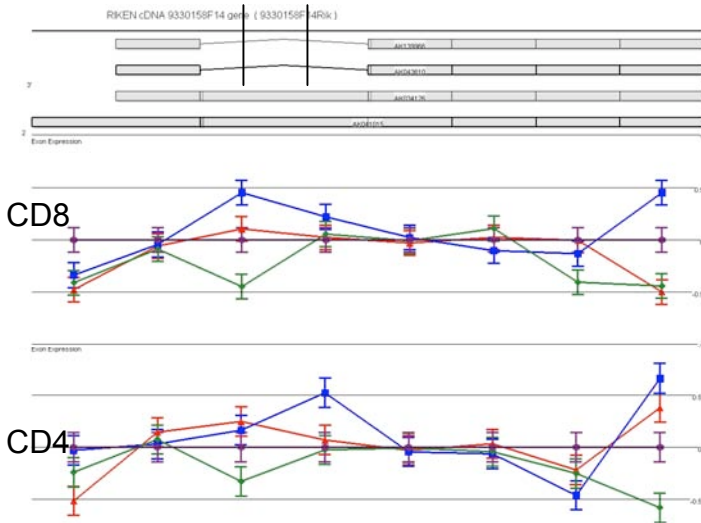

Smn1 This exon is selectively absent from a subset of human transcripts encoding Smn (exon5)

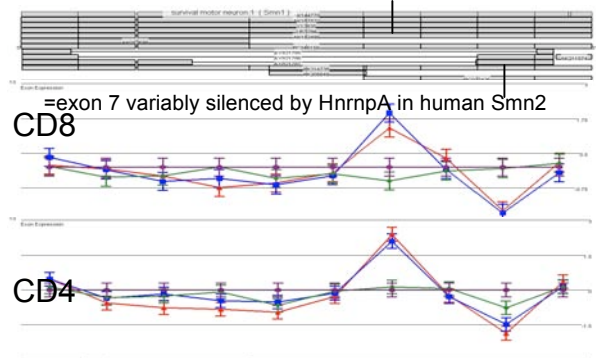

Exon 4 skipped in multiple transcripts Sorbs2 = ArgBP2

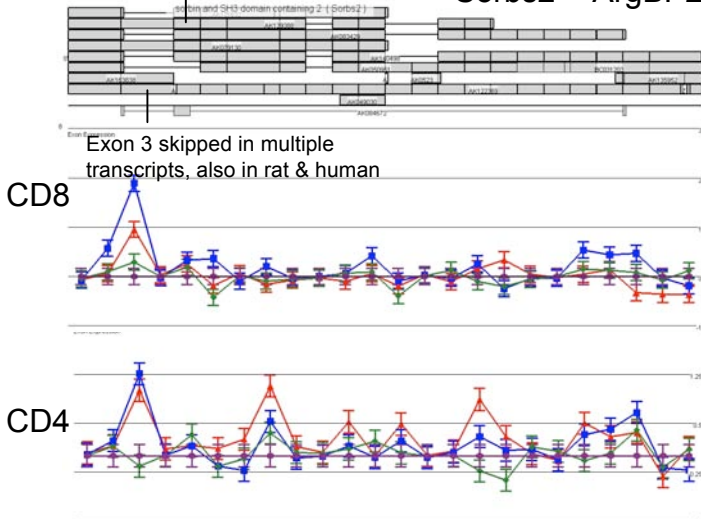

Ttc23 Cassette exon in two transcripts

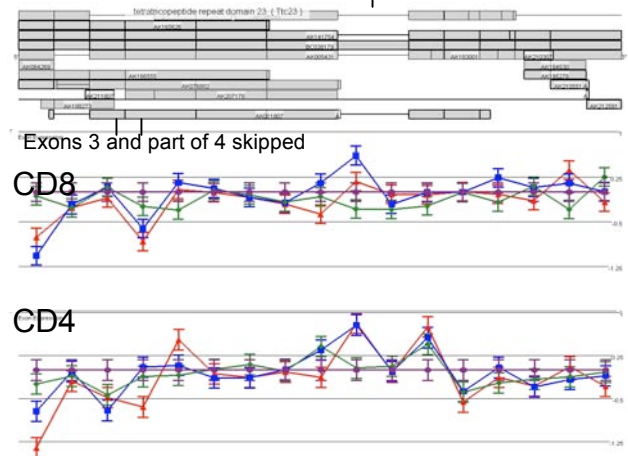

Ube1l Alternative splicing to give alternative 3'UTRs

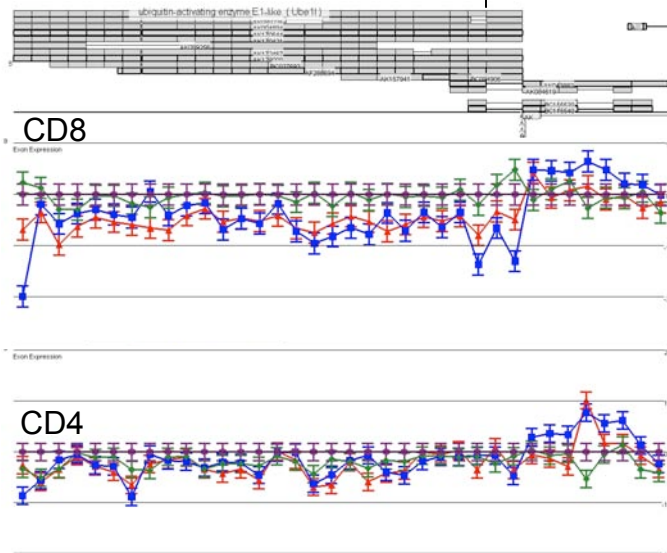

Zc3h5 = Unk Alternative splice donor within exon 8, in frame deletion of 13aa

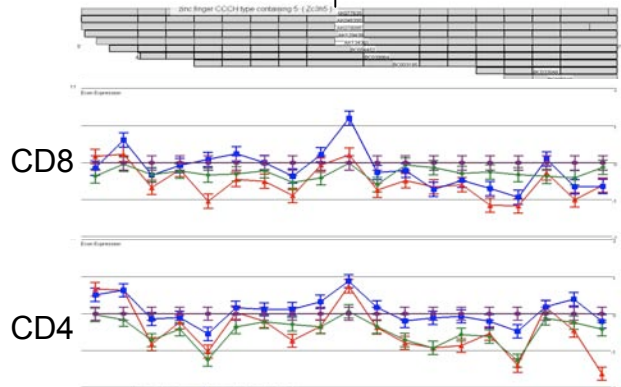

# Group B

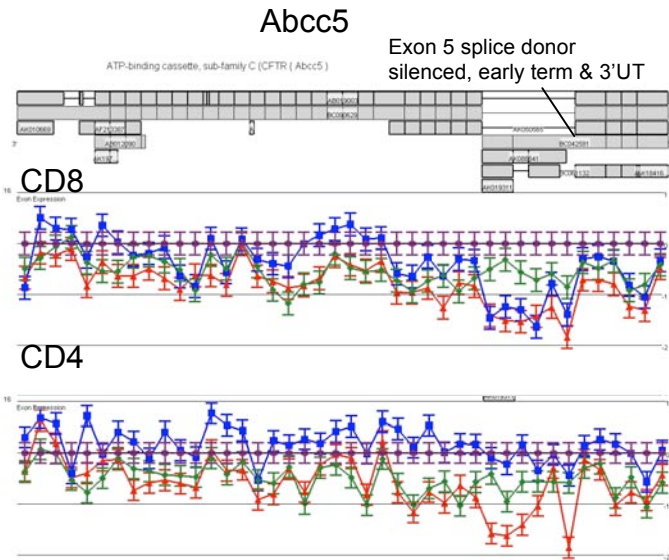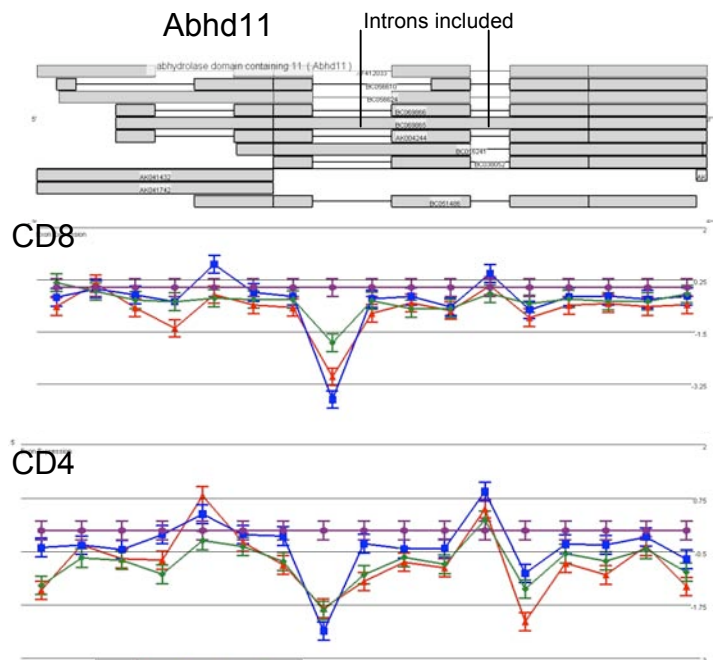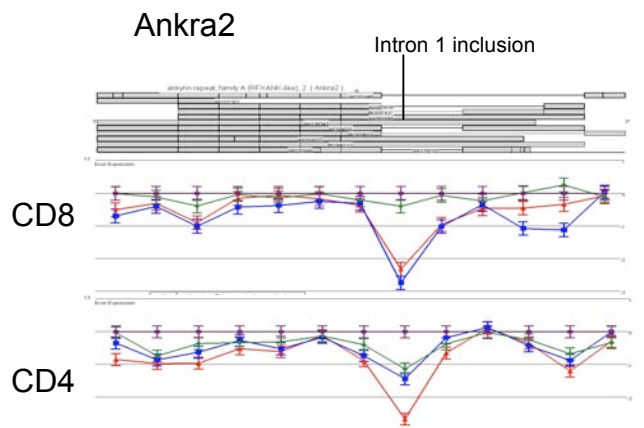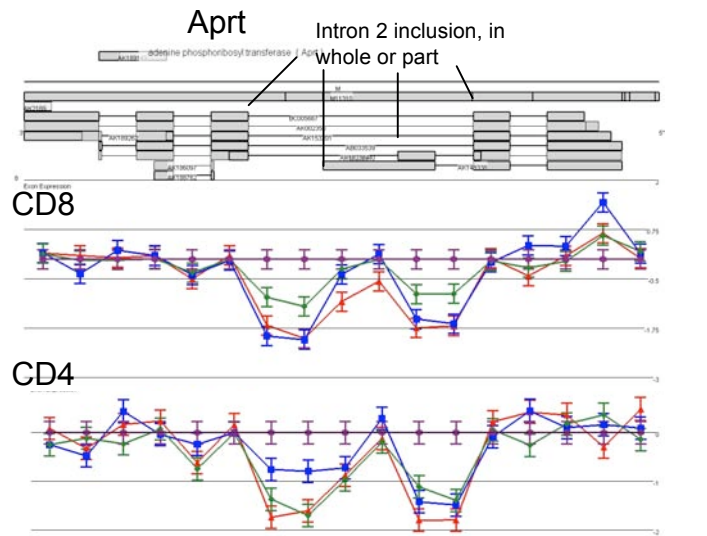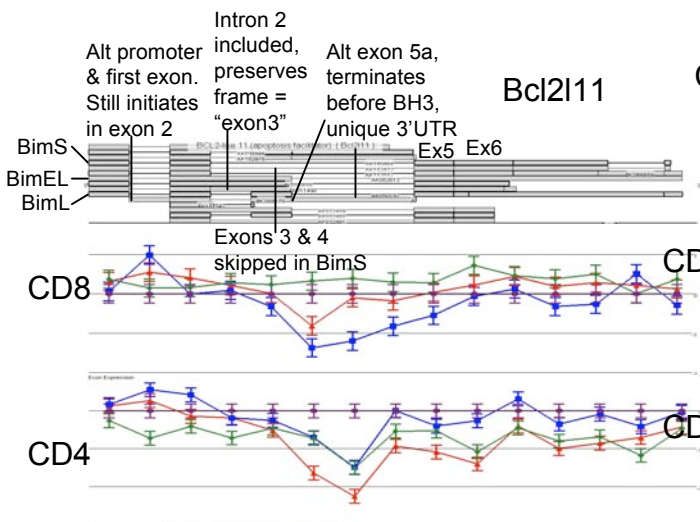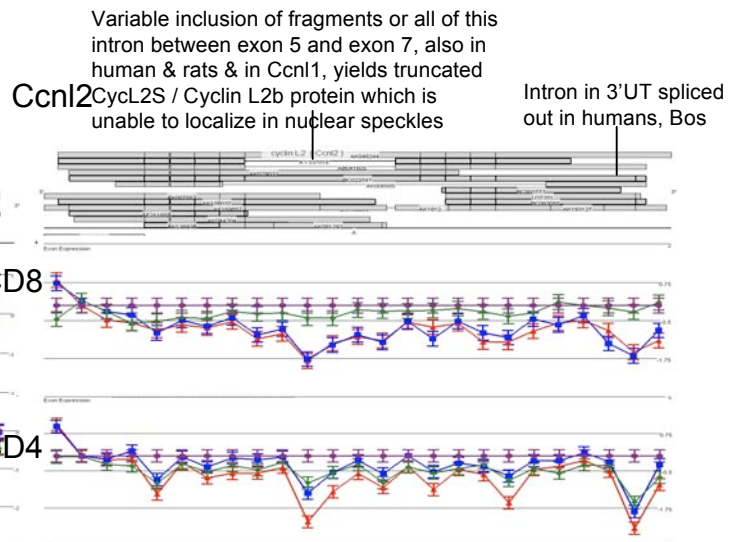



# Group B

Trim71 = Cnot10 = Lin41

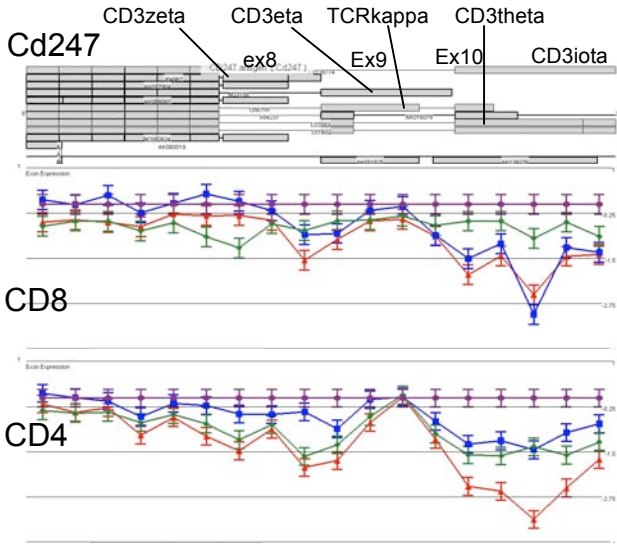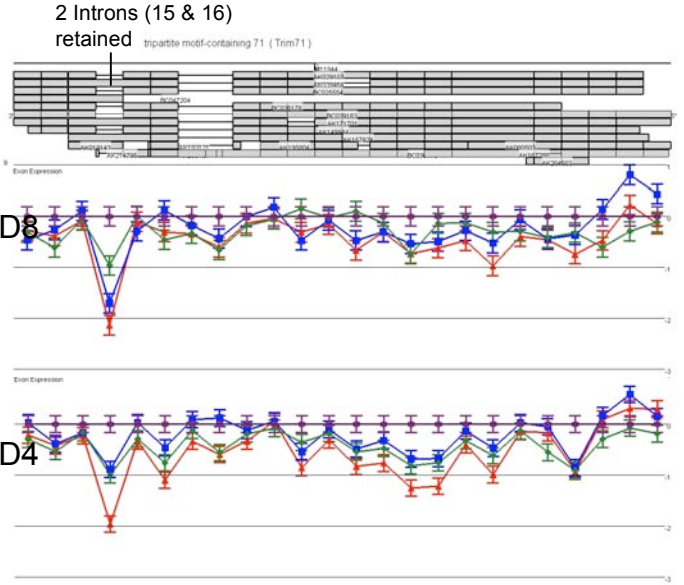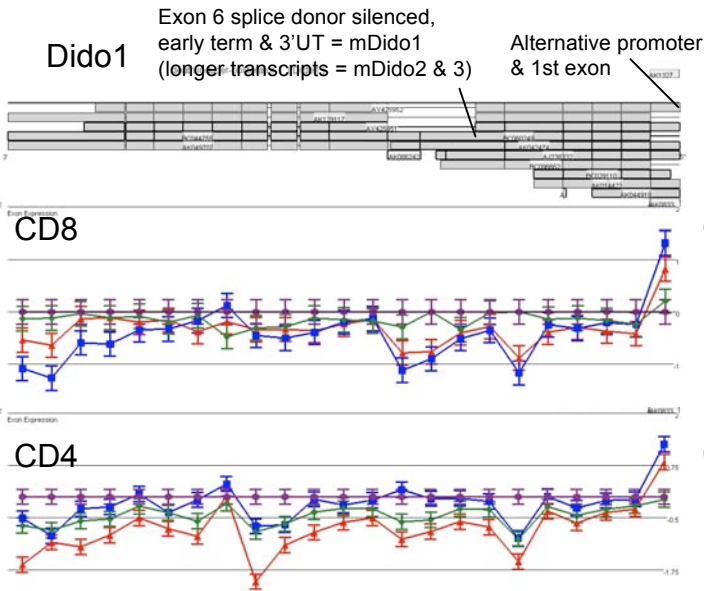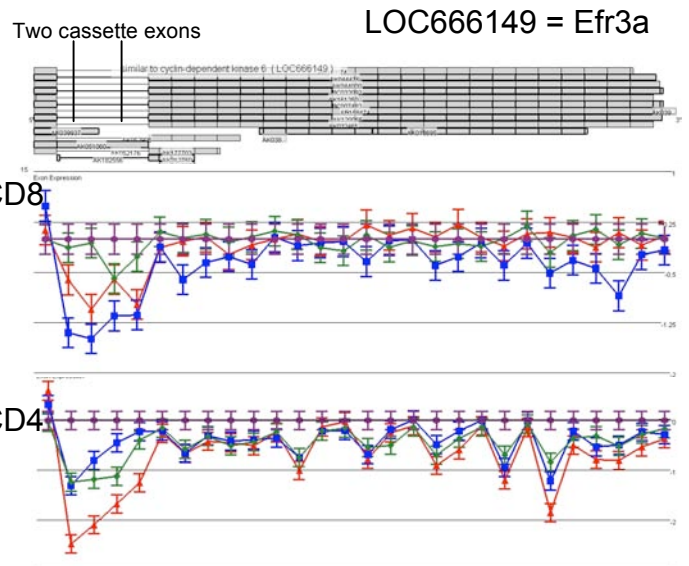

Rabepk (actually this is centromeric, these transcripts are

Fbxw2

Alternative ex3 internal splice acceptor, multiple transcripts

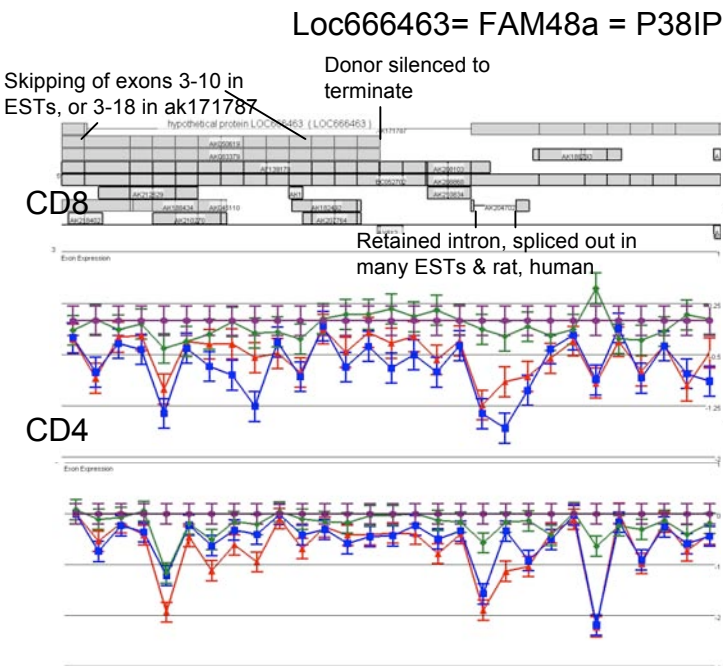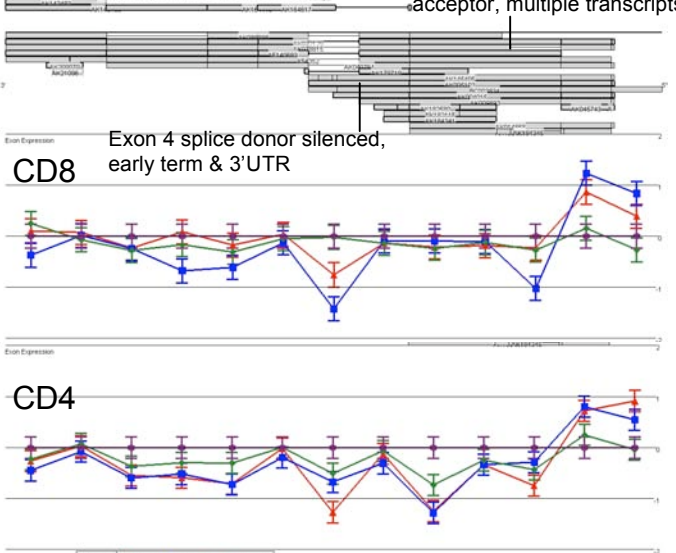

# Group B

BC032204 = FERMT3

Tnrc15 = Gigyf2

Exons 7 & 8 skipped

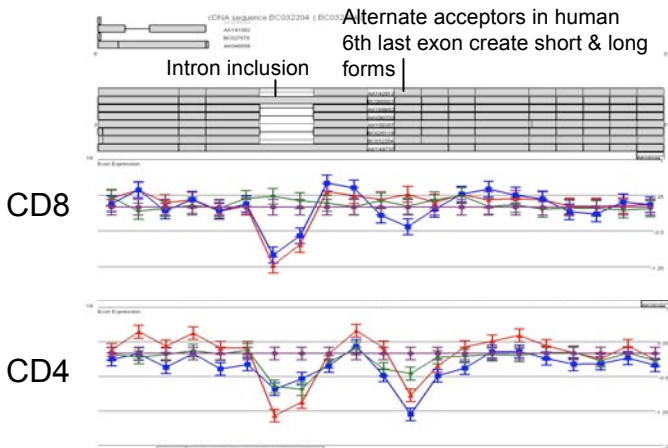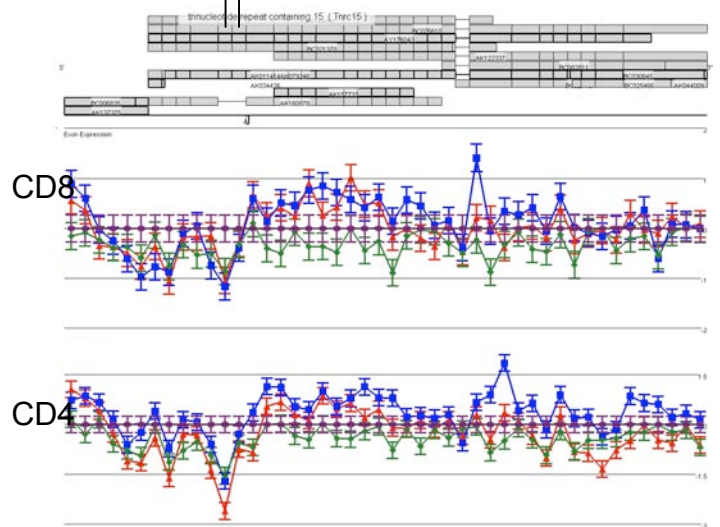

Gtf3c2

Intron in 5'UT retained entirely, or more often 3' splice donor in exon 1 Htf9c

Splice donor silenced (AK043944) or intron retained (Bc043100) to terminate prot & transcript

Skipping multiple exons in AK154056

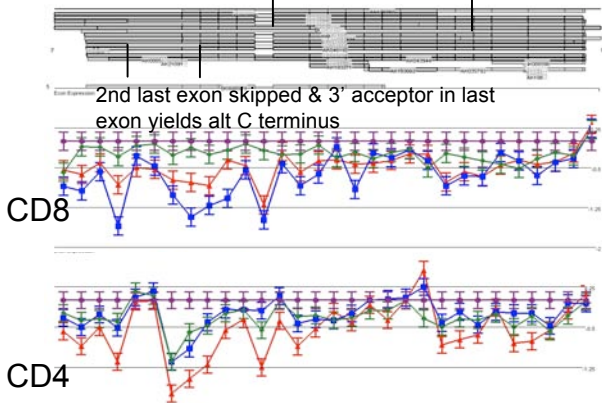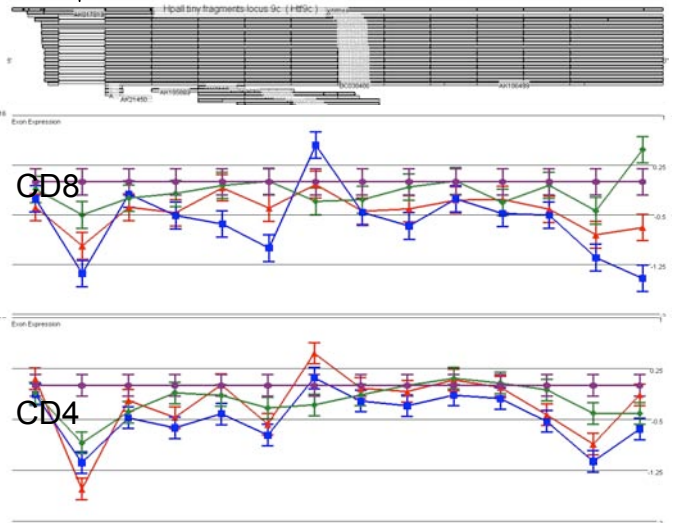

Kif23

Lrdd = PIDD

Alt 5' donor ex 12 & 3' acceptor in exon 13

Alt 3' acceptor in exon 7 & 10

Small intron 2 retained in most transcripts

Splice donor silenced to terminate & 3'UT

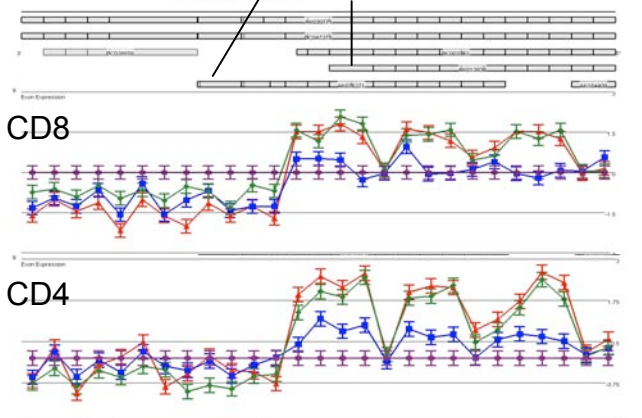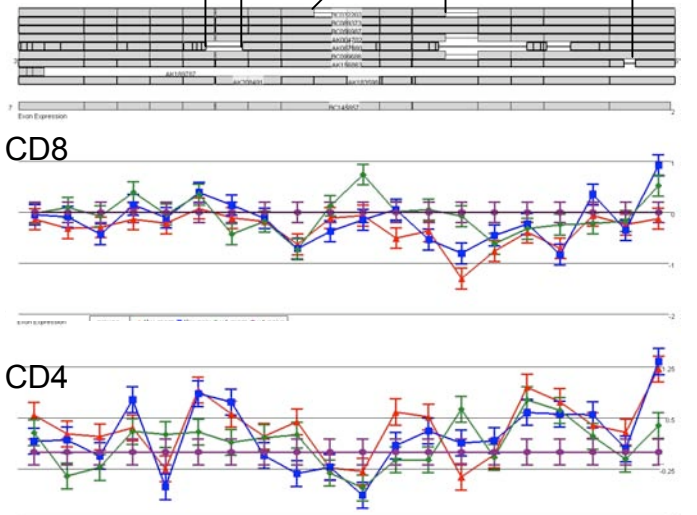

# Group B

Madd

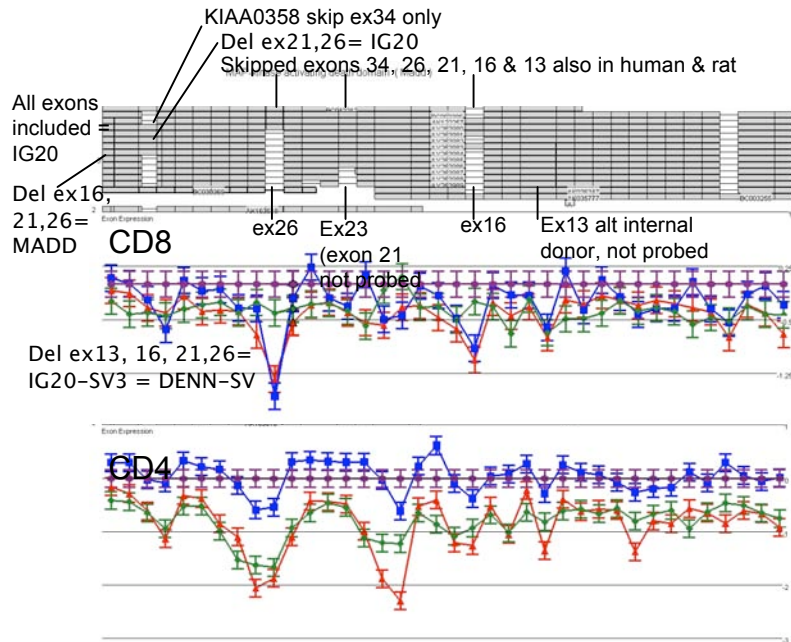

Man2a2

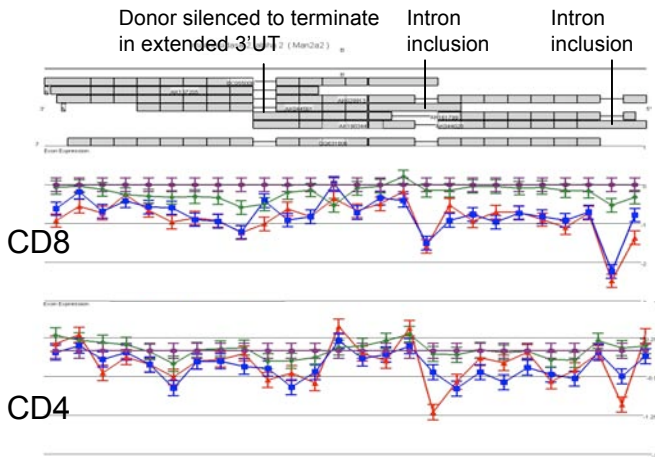

Map3k7 = Tak1

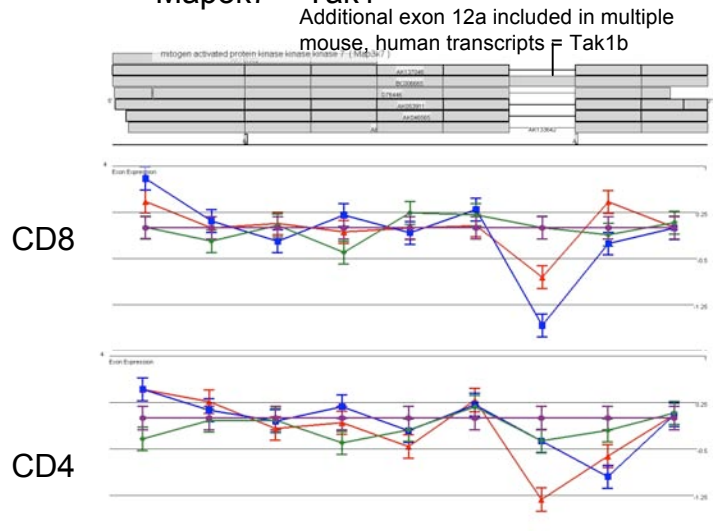

LOC667632 = Mid1

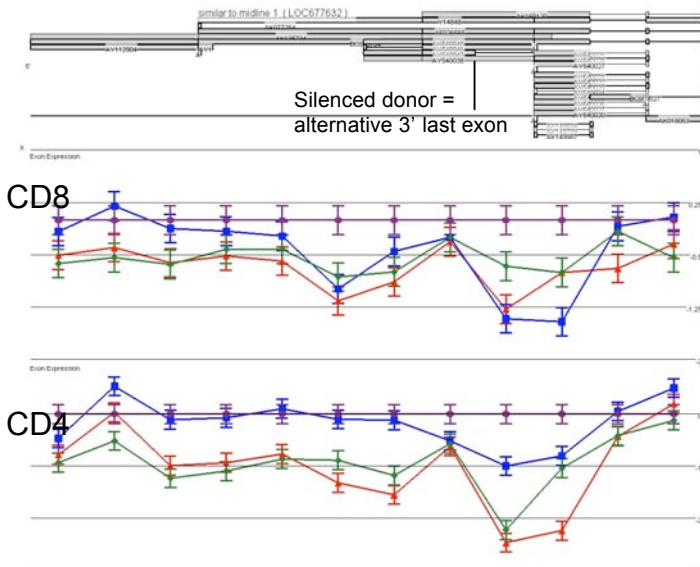

Mtap4

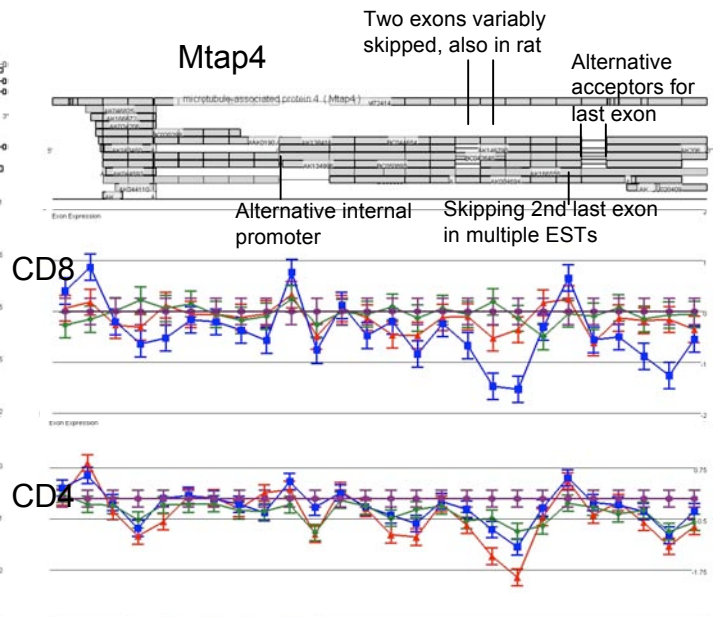

# Group B

## Myo7a

Alternative ex34 splice acceptor in intron, also in human

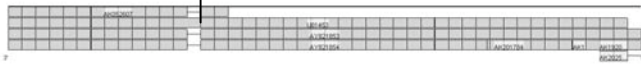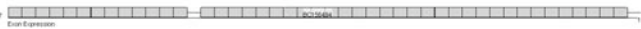

CD8

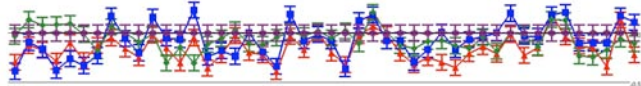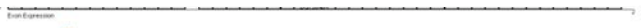

CD4

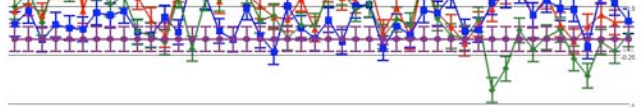

## Nisch

Internal splice donor and acceptor and 2 variably skipped exons

skipped exon in ESTs

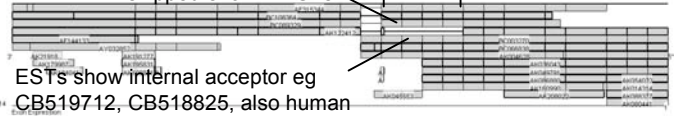

ESTs show internal acceptor eg CB519712, CB518825, also human

CD8

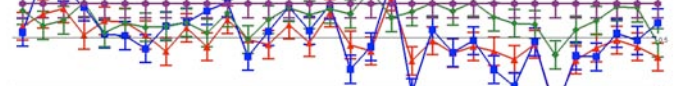

CD4

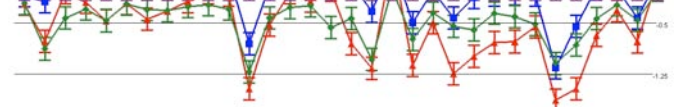

## Nlrp1 = Nalp1

Alternative donors and acceptors between 2nd last and last exons, in frame, DQ117601 form matches human  
 Alternative acceptor corresponds to 901 huNAC in LRR4 & LRR5 in huDEFKAP, plus skipped exon upstream not found in huNAC

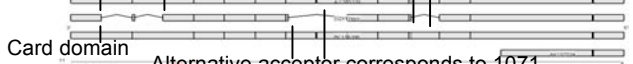

Card domain begins here

Alternative acceptor corresponds to 1071 huNAC & LRR8 Defcap, plus skipped exon upstream not present in huNAC

CD8

CD4

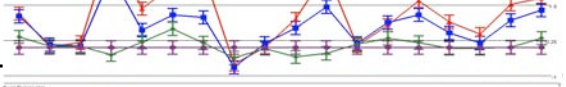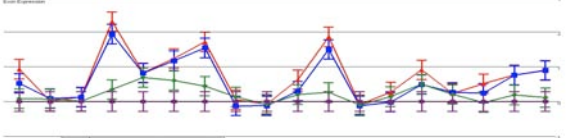

Alternative cassette exons

3 skipped exons + internal acceptor in next

## Ogdh

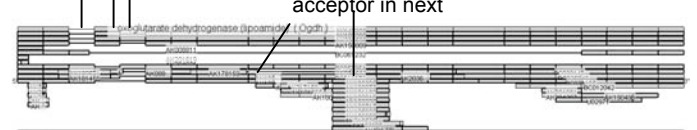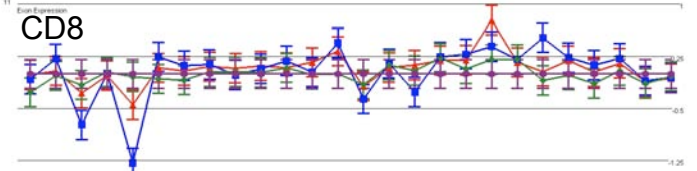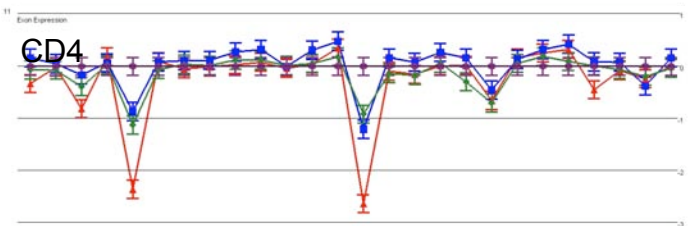

5a exon encoding insert in paired domain variably skipped, also in man, rat, fish, quail etc

## Pax6

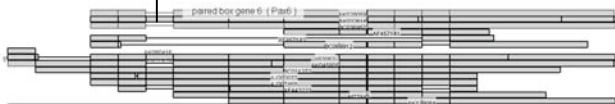

CD8

CD4

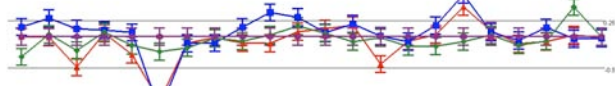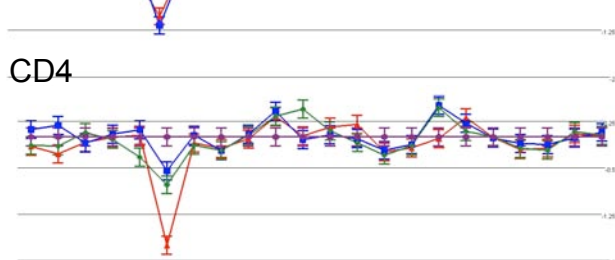

## Prpf4b

Additional exon in BC003769

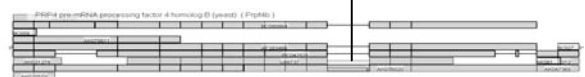

CD8

CD4

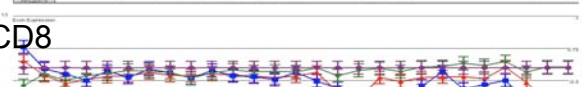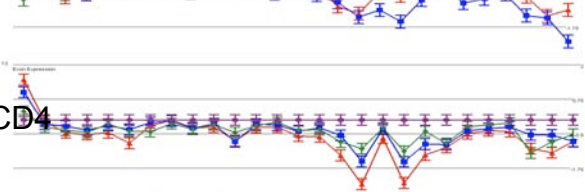

# Group B

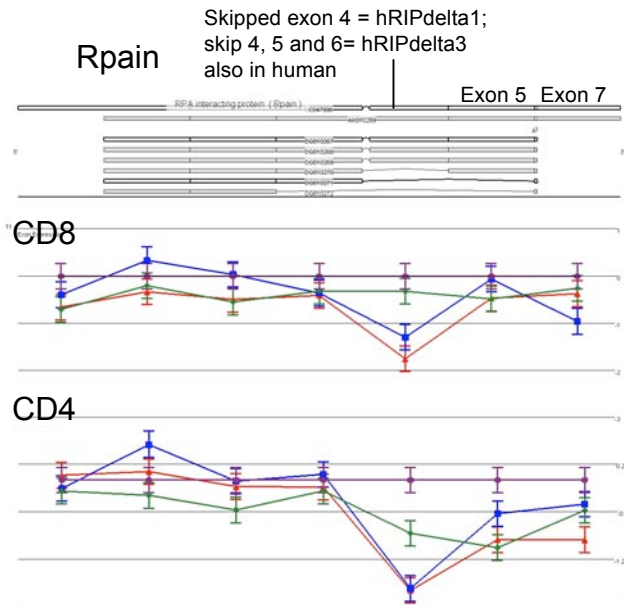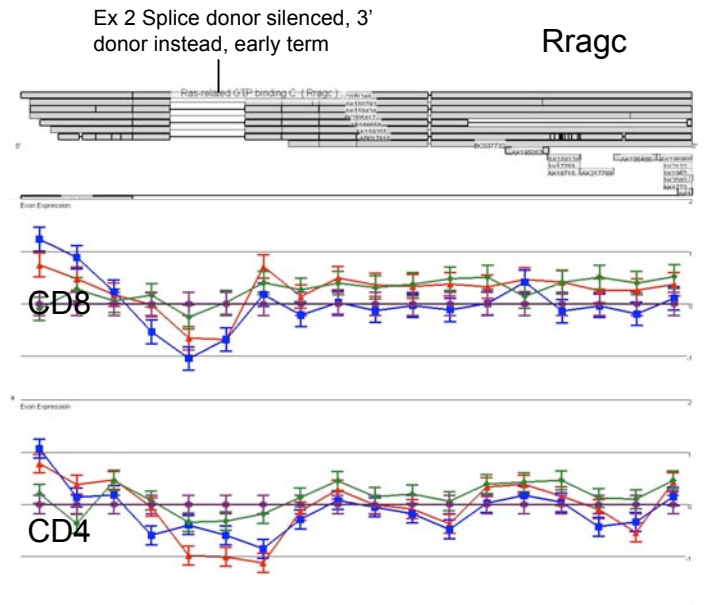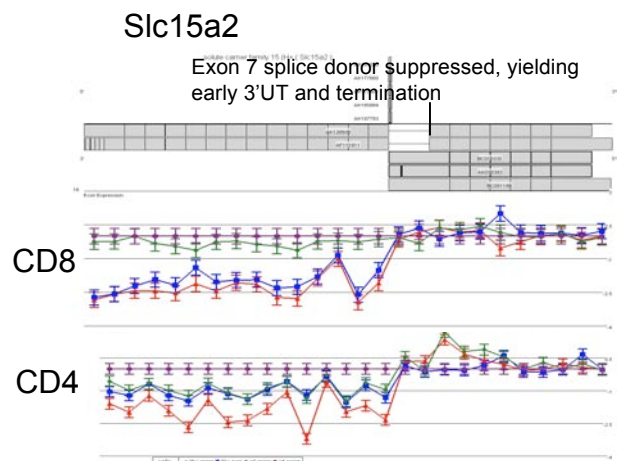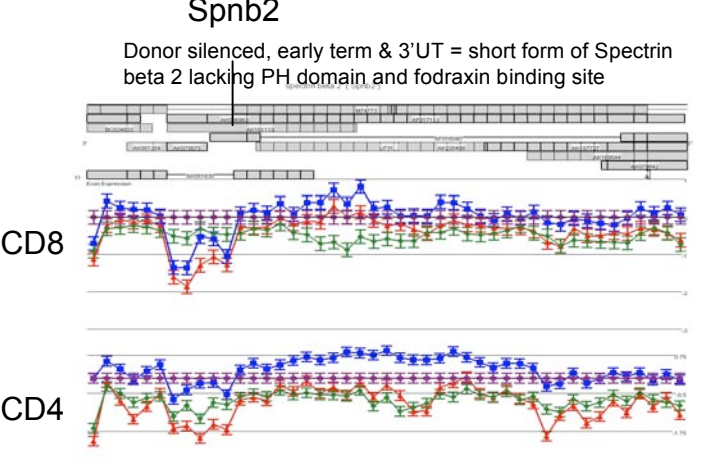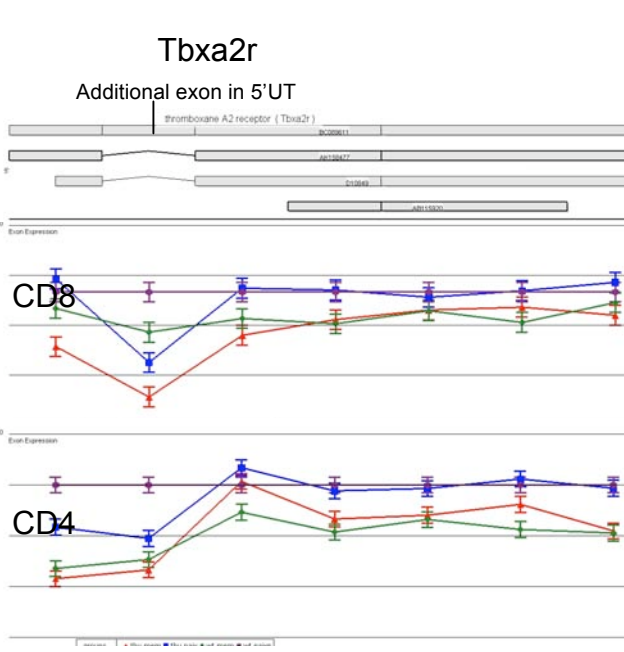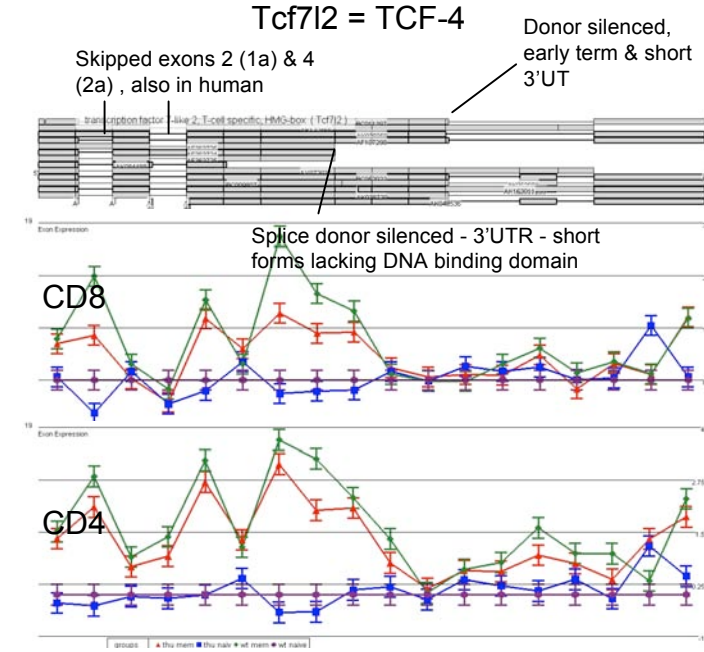

# Group B

## Thns1l

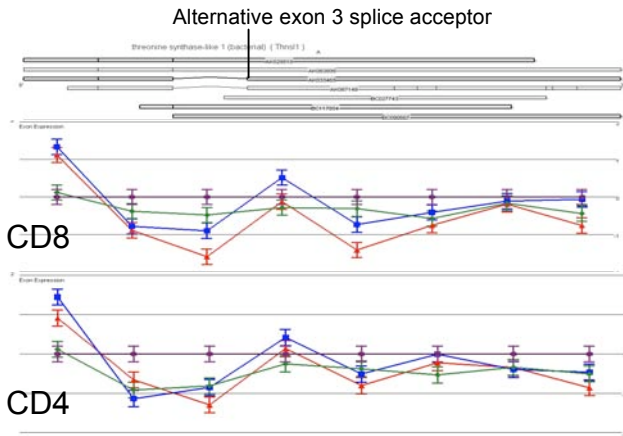

## LOC546401 = Thrap3 = Trap150

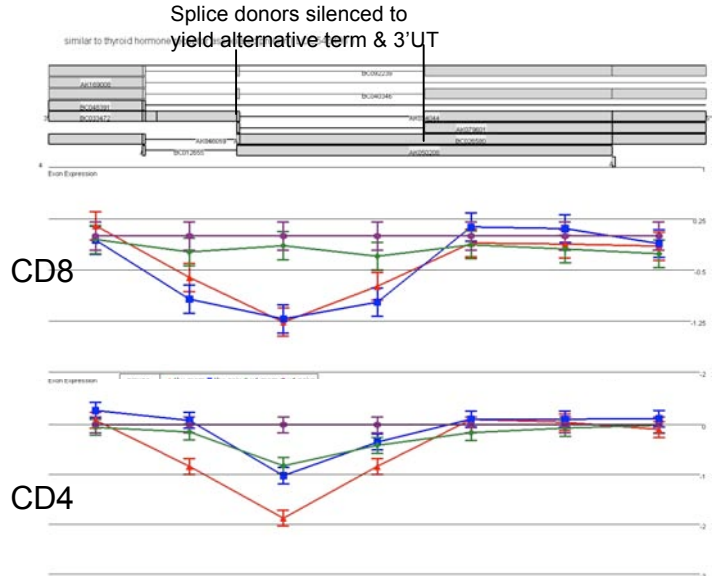

## Tle1 = Grg1

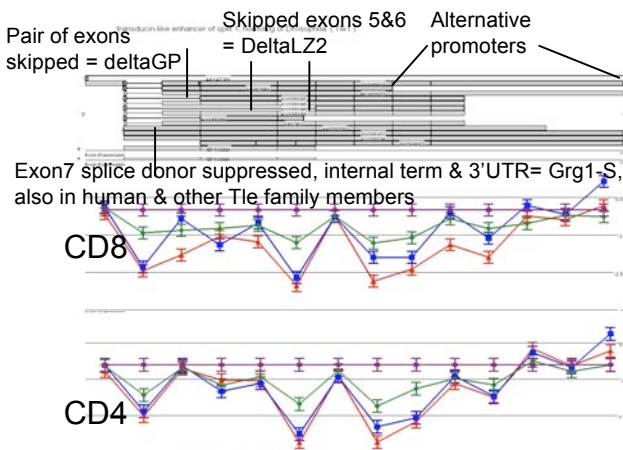

## Tpd521l = hD53

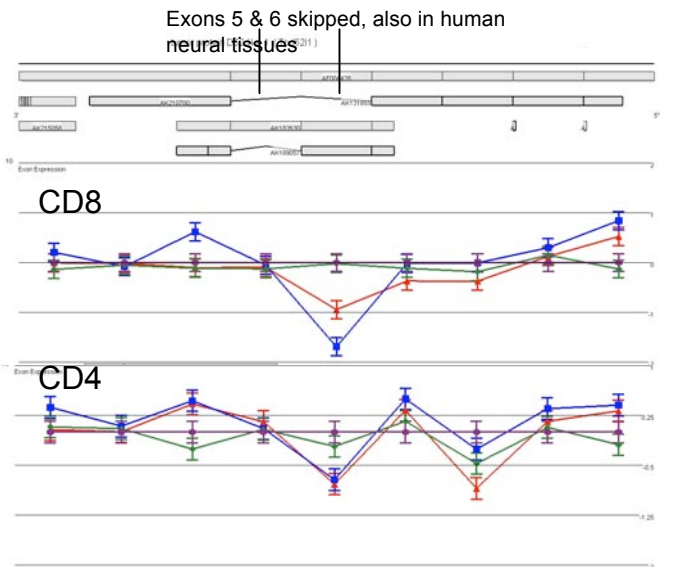

## Tpr

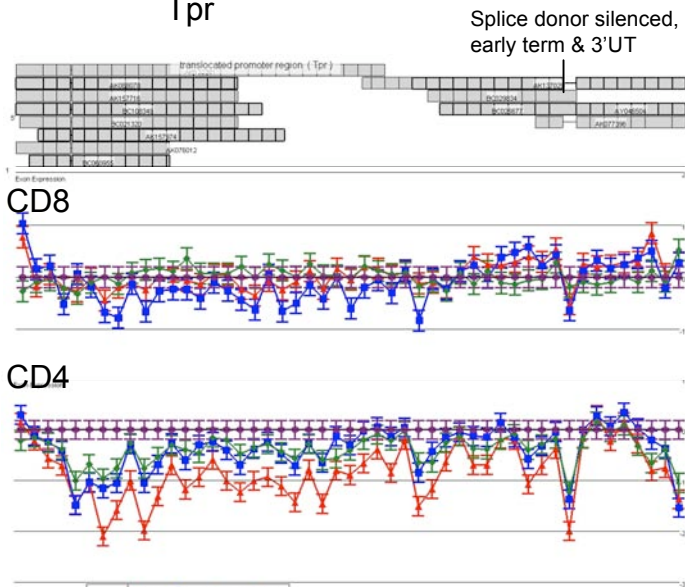

## Ufc1 = Usp21

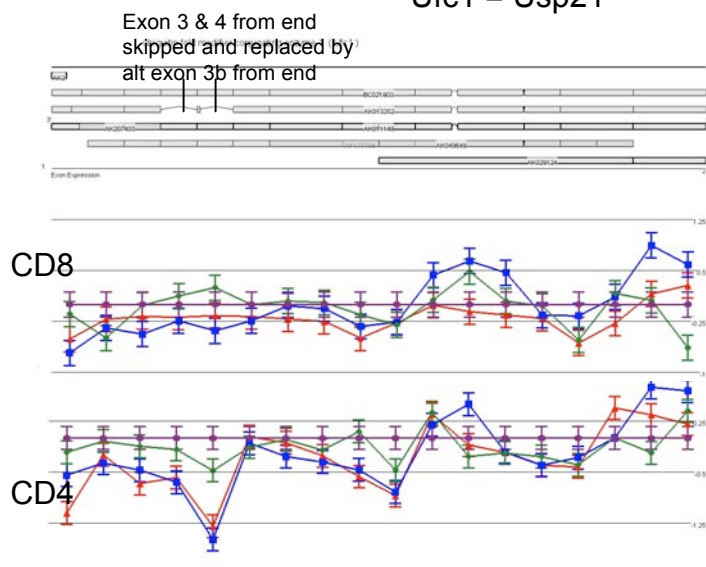

# Group B

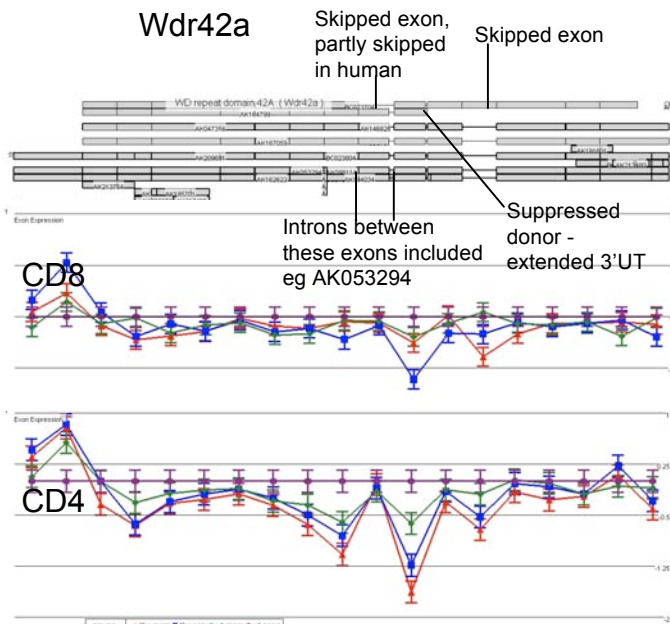

# Group C Genes

2310044H10Rik = homo C19Orf63

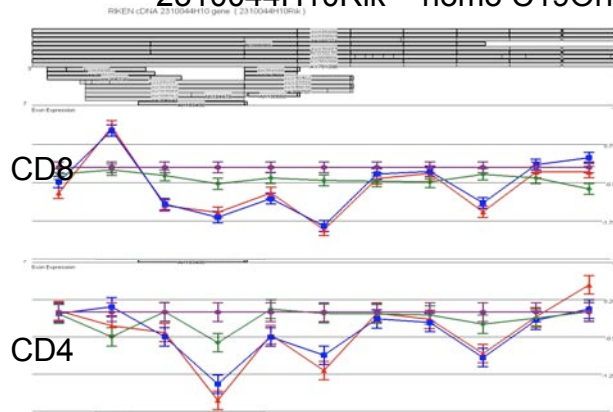

BC025575 =homo MCC34829 hypothetical protein

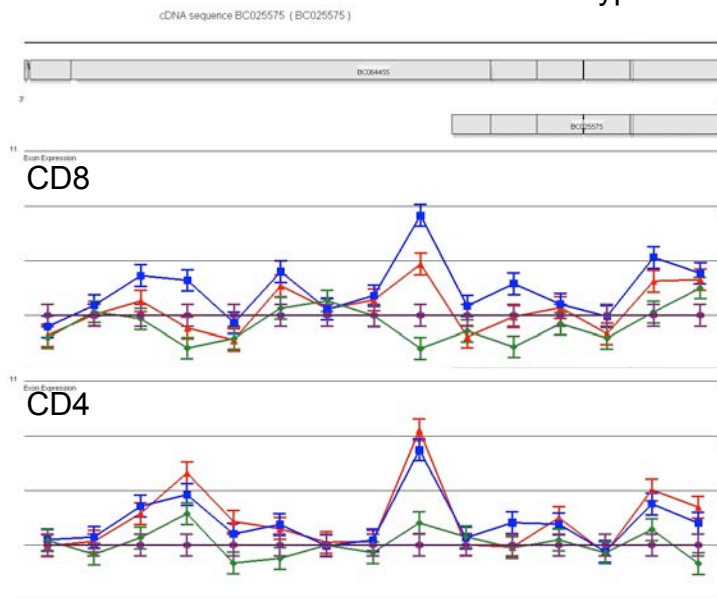



# Group C Genes

Adamt14 exons and transcripts

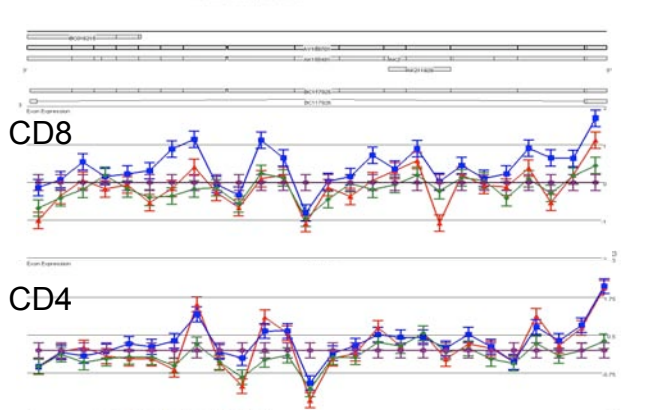

Aff4 exons and transcripts

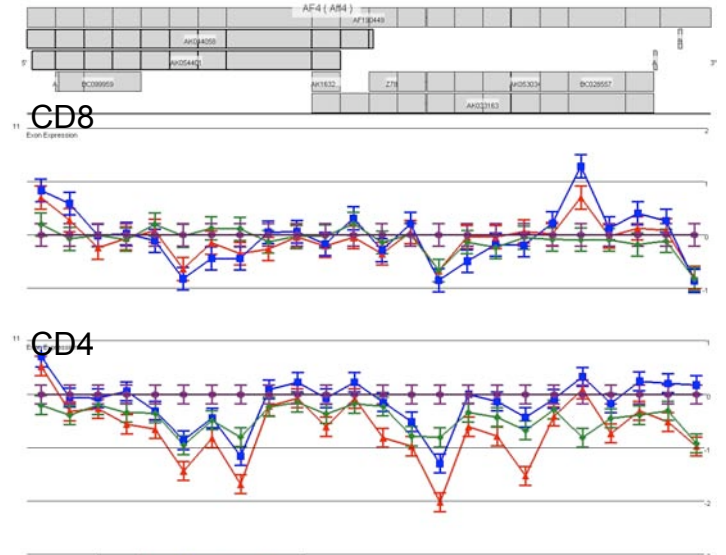

Abca8a exons and transcripts

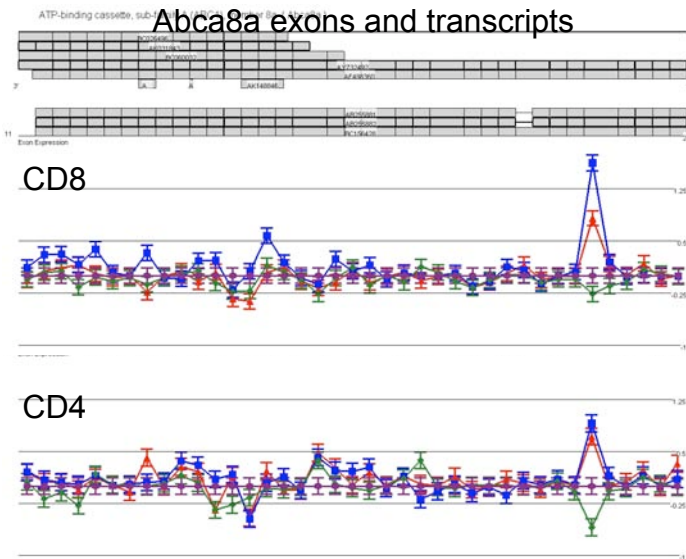

Abca4 exons and transcripts

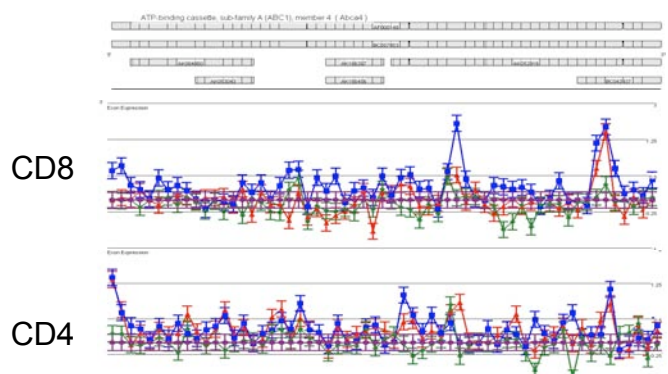

Acp2 exons and transcripts

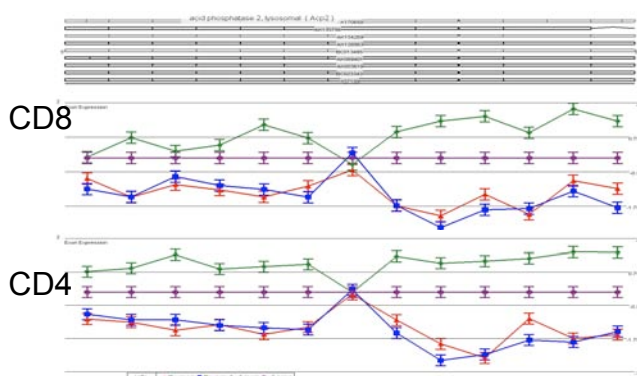

Adam33 exons and transcripts

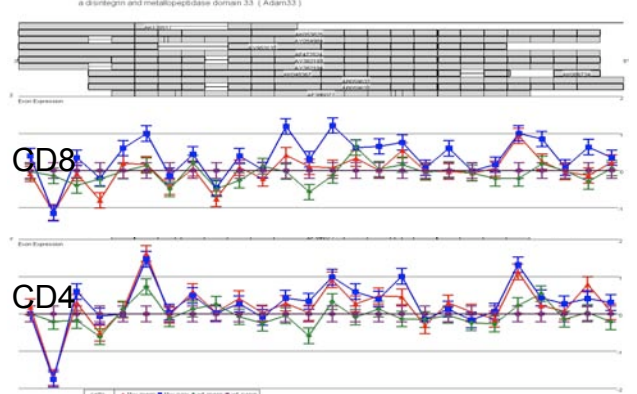

# Group C Genes

## Arhgef10 exons and transcripts

## Aspm exons and transcripts

CD8

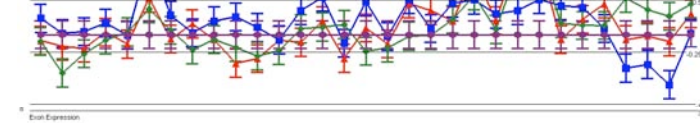

CD4

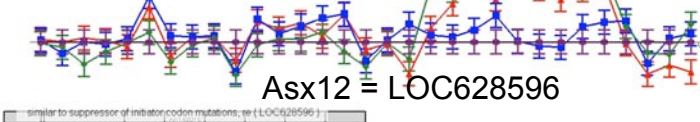

Asx12 = LOC628596

CD8

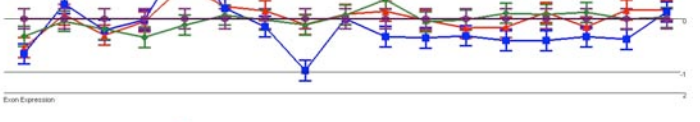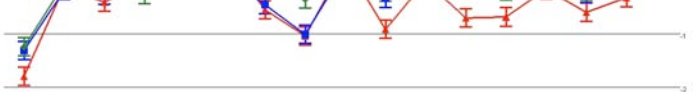

LOC669789 = Brunol6

CD8

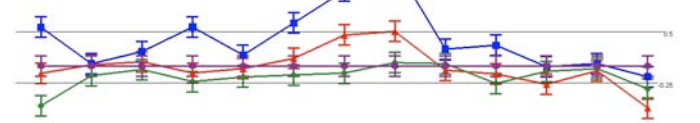

CD4

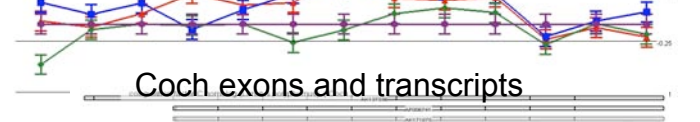

## Coch exons and transcripts

CD8

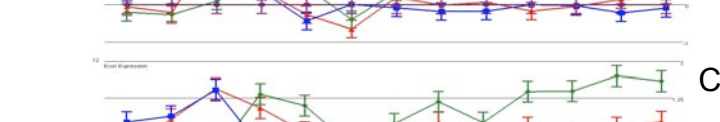

CD4

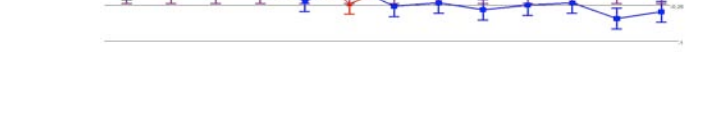

CD8

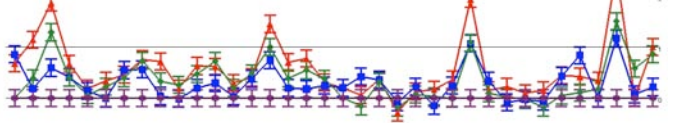

CD4

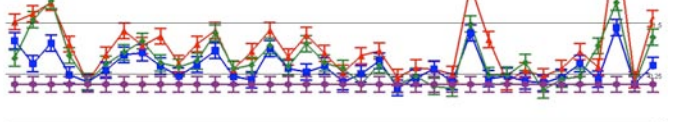

## Bcl7a exons and transcripts

CD8

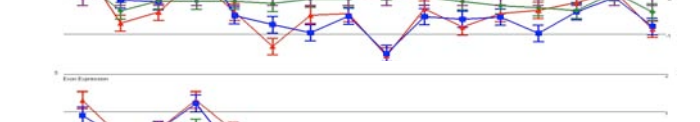

CD4

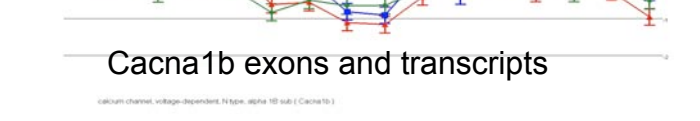

## Cacna1b exons and transcripts

CD8

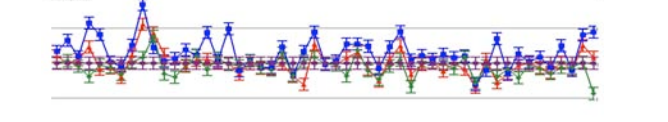

CD4

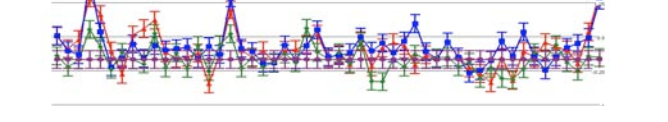

## Cnksr2 exons and transcripts

CD8

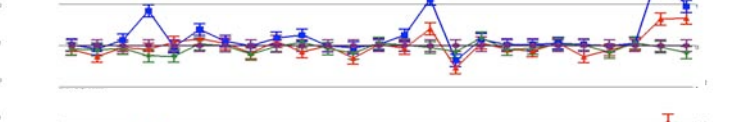

CD4

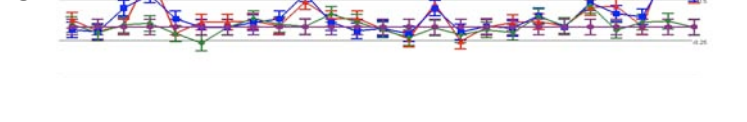

# Group C Genes

# Col16a1 exons and transcripts

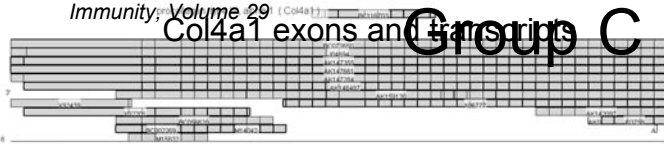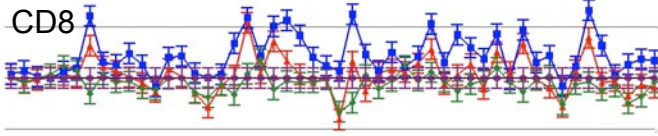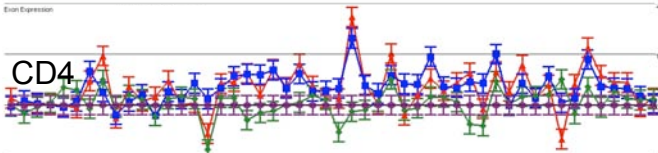

Dmgdh exons and transcripts

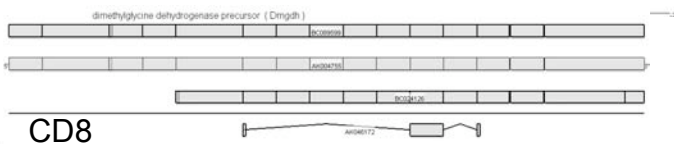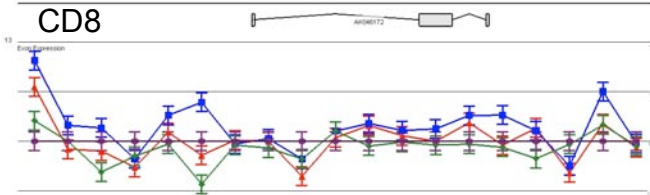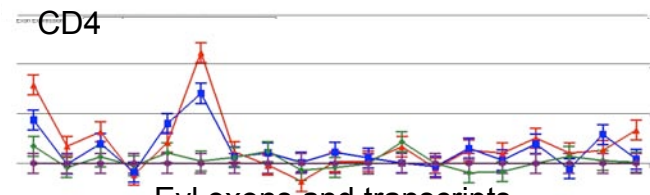

Evl exons and transcripts

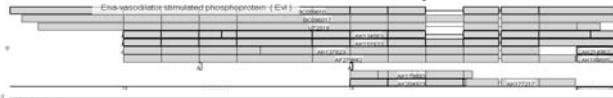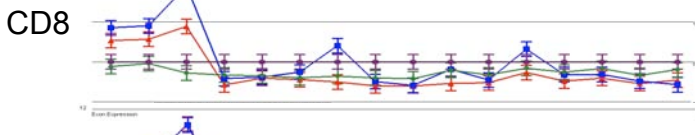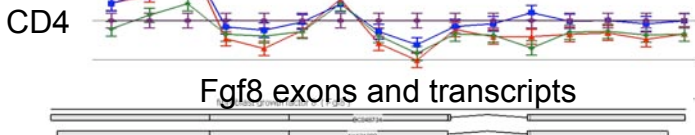

Fgf8 exons and transcripts

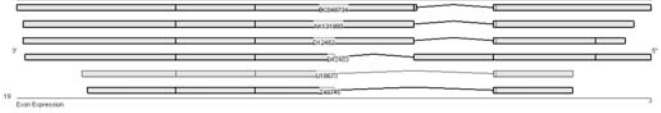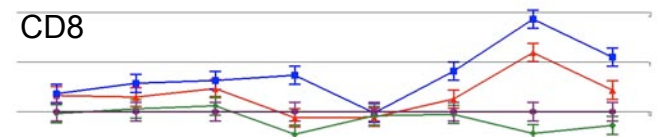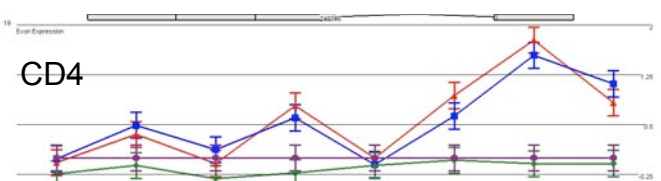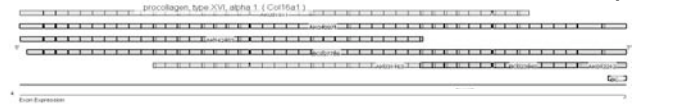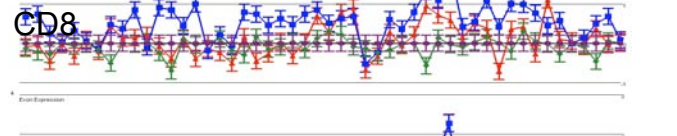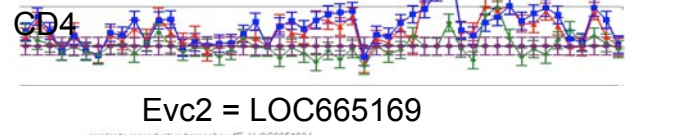

Evc2 = LOC665169

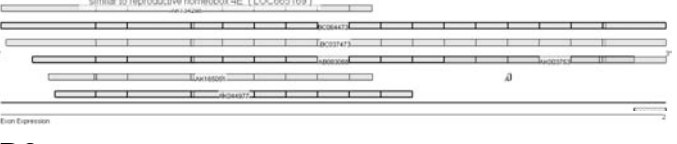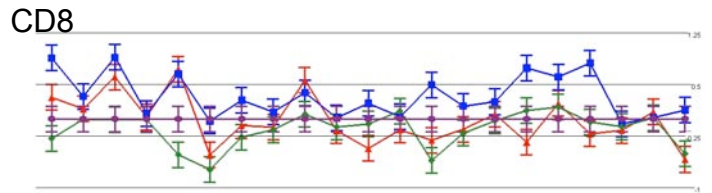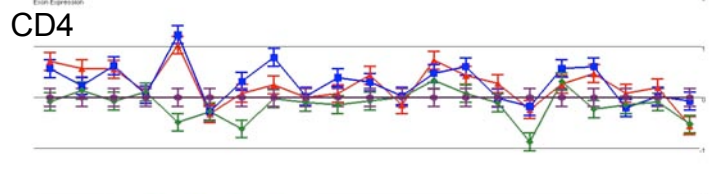

Fgb exons and transcripts

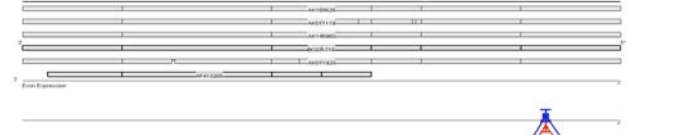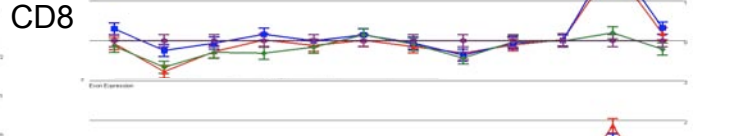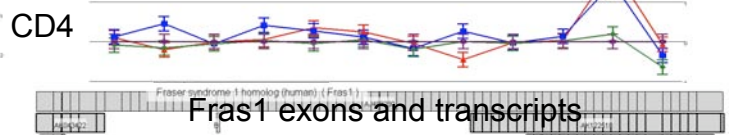

Fras1 exons and transcripts

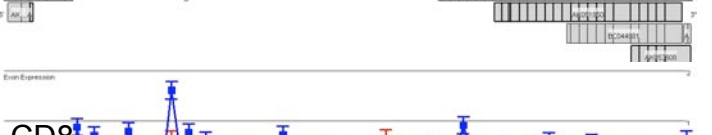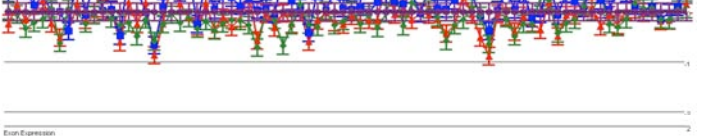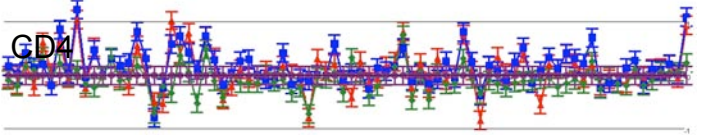

# Group C Genes

Galnt5 exons and transcripts

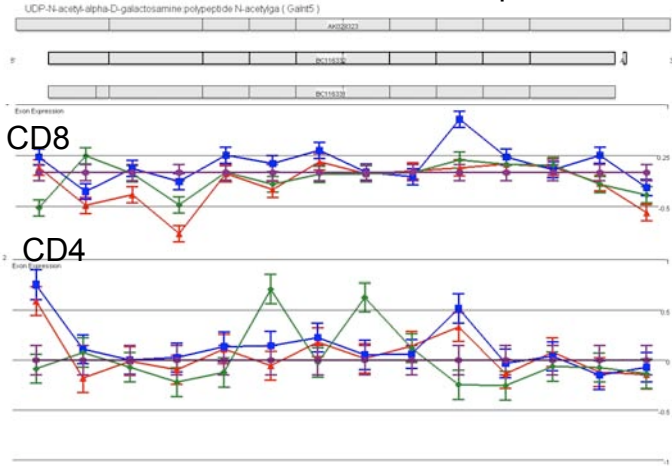

Gln exons and transcripts

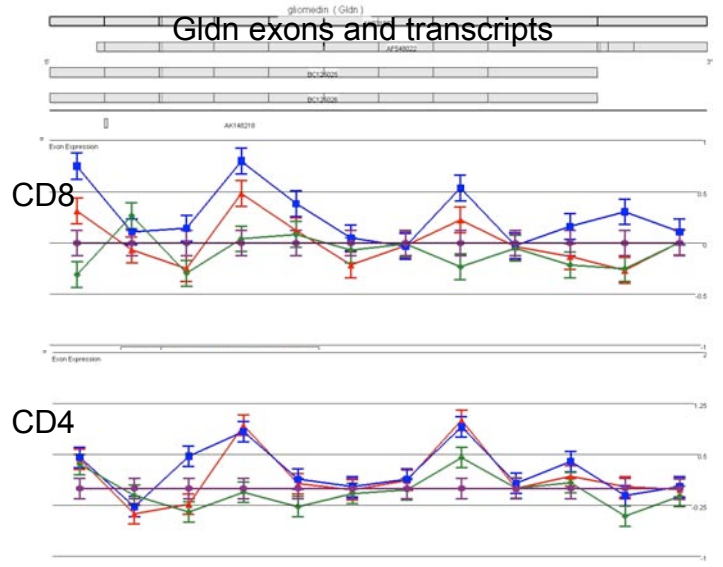

Gucy2e exons and transcripts

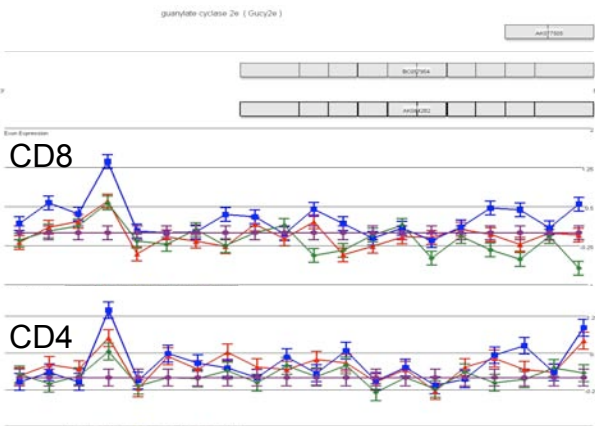

Hcn1

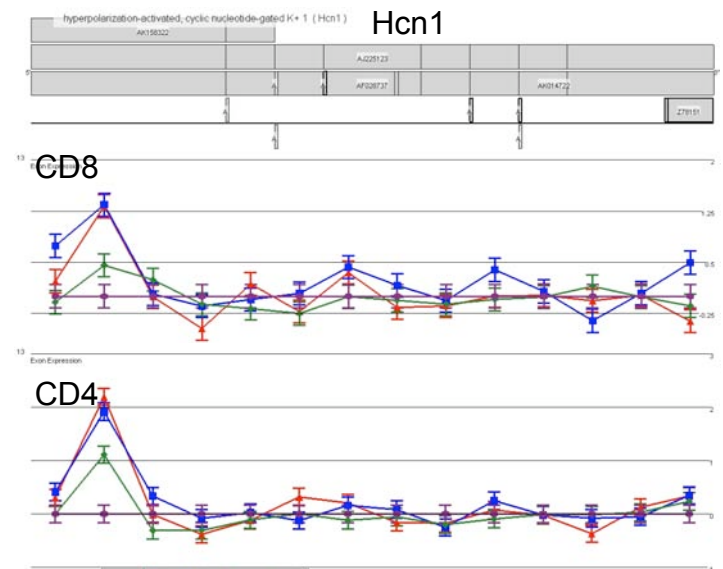

Heatr6 = 2700008B19

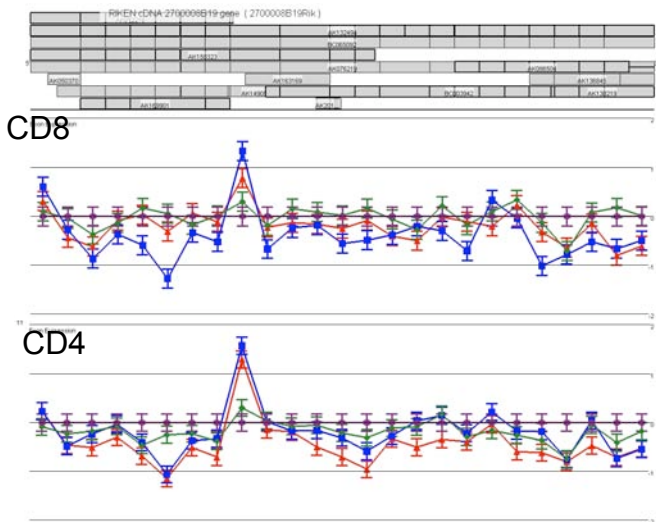

Hydin exons and transcripts

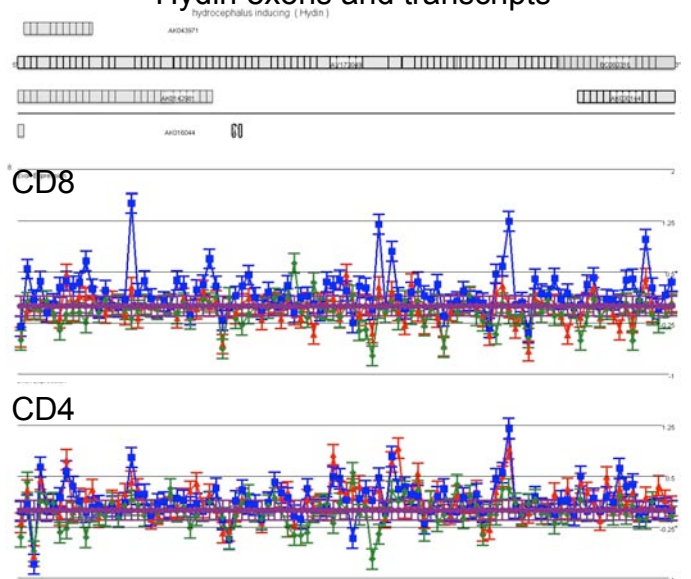

# Group C Genes

## Itga6 exons and transcripts

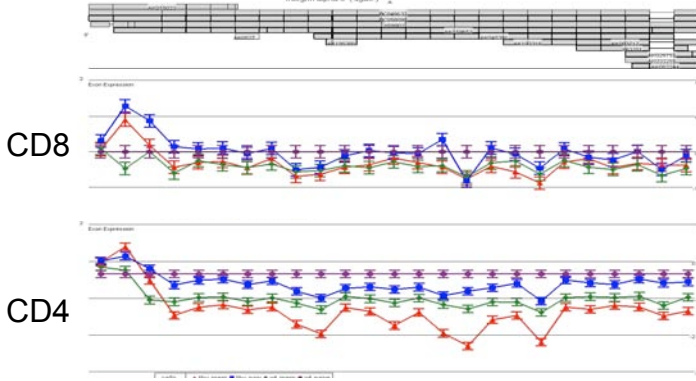

## Itgb4 exons and transcripts

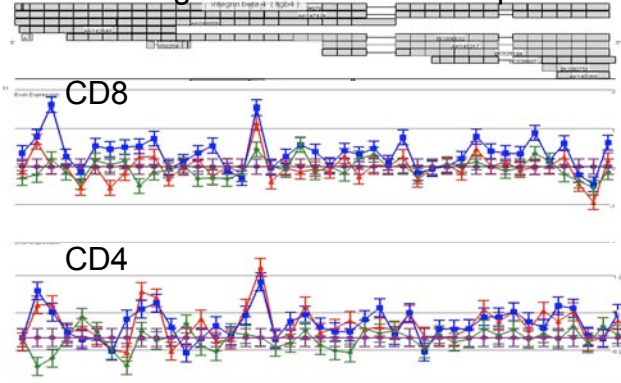

## Lama1 exons and transcripts

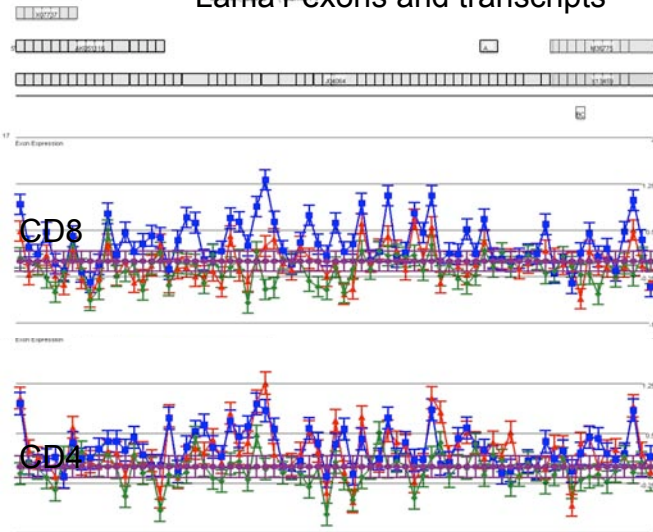

## Notch4

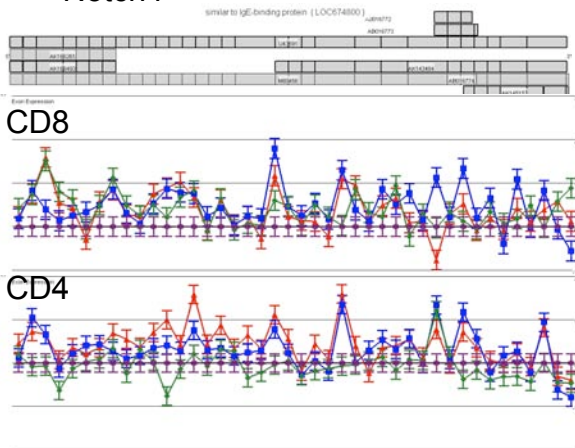

## KLhl11 exons and transcripts

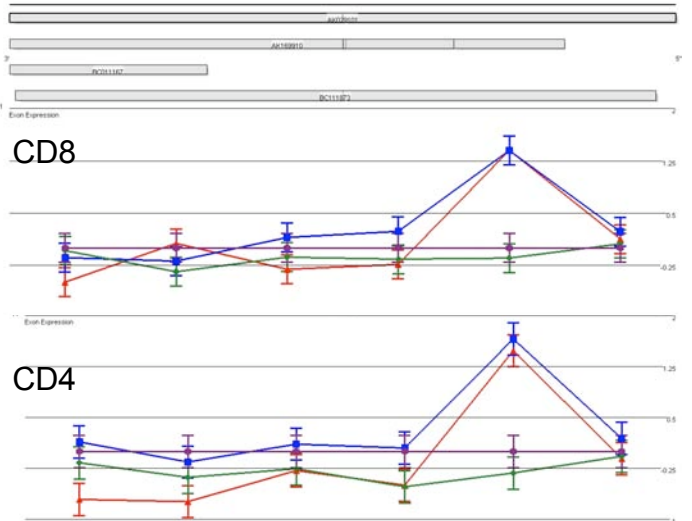

## Mall exons and transcripts

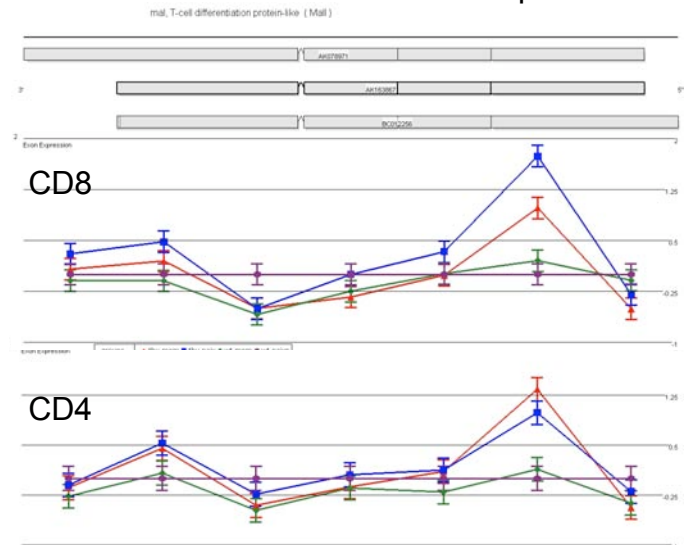

## Otud7a exons and transcripts

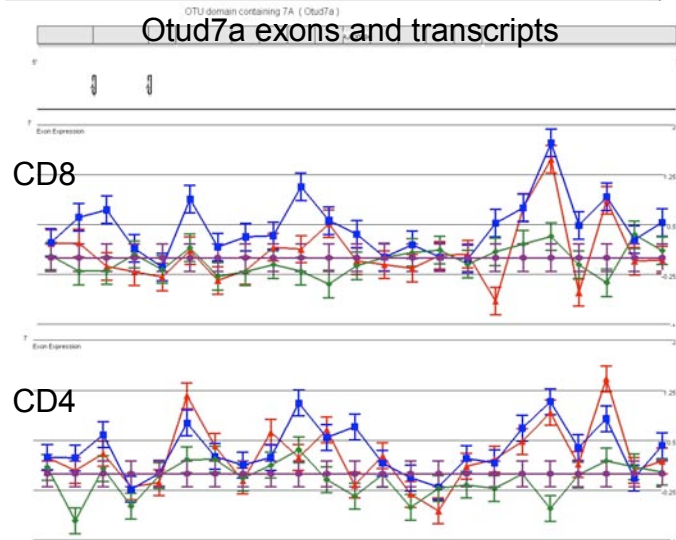

# Group C Genes

## Pdcd11 exons and transcripts

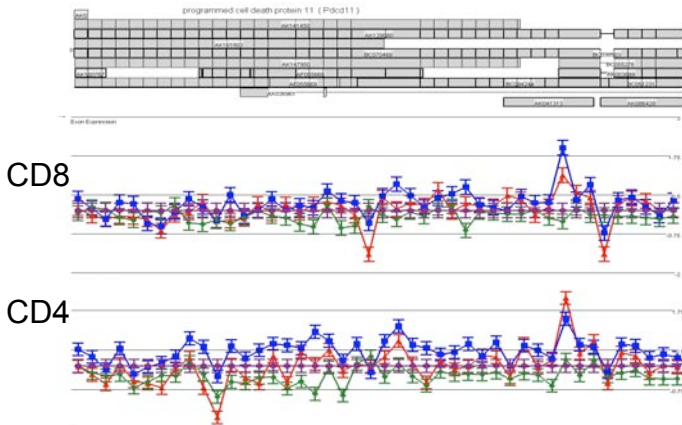

## Pla2g4e exons and transcripts

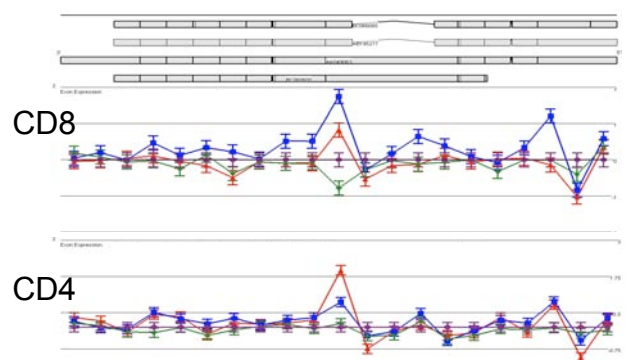

## PLce1 exons and transcripts

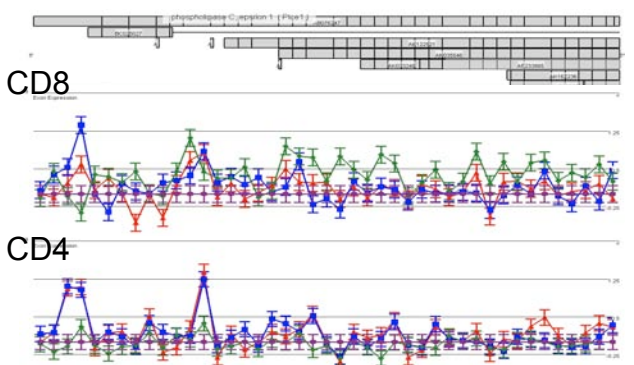

## Ptprg exons and transcripts

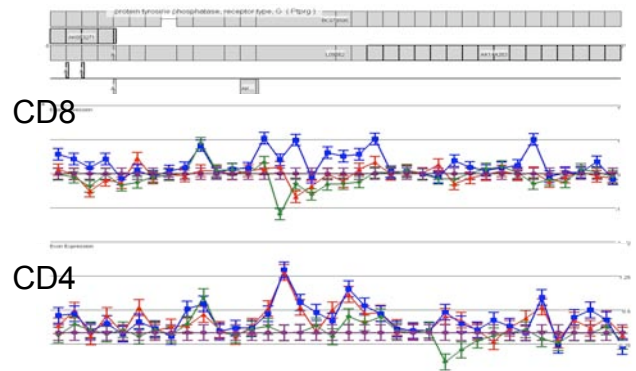

## Ptprv exons and transcripts

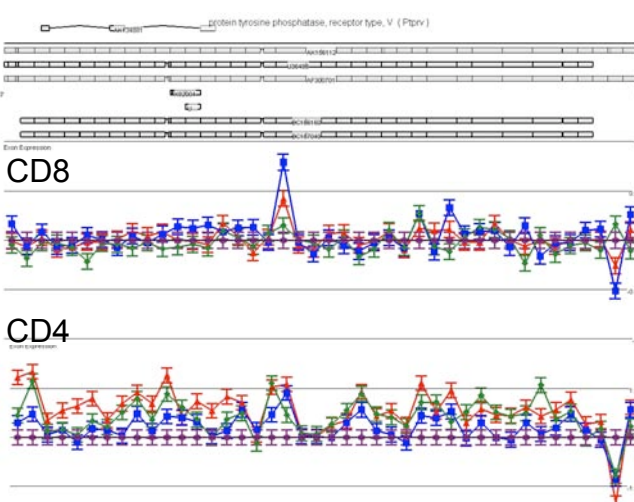

## Rhbdd3 exons and transcripts

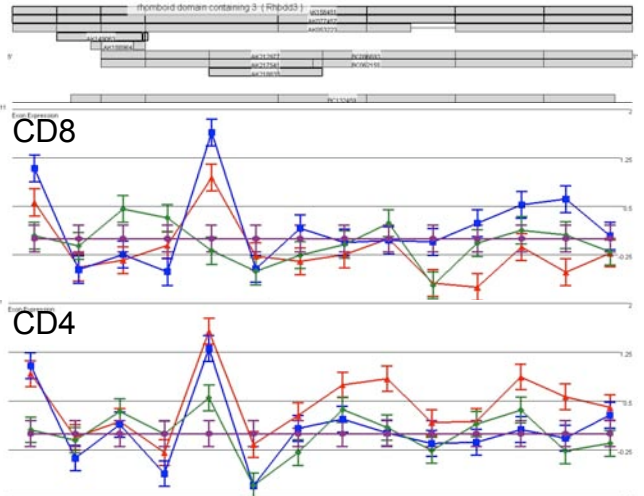

## Rhbd11 exons and transcripts

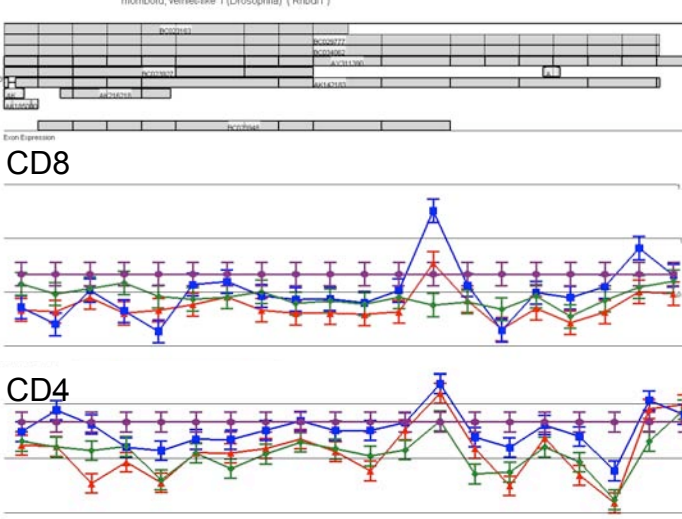

## Ryr1 exons and transcripts

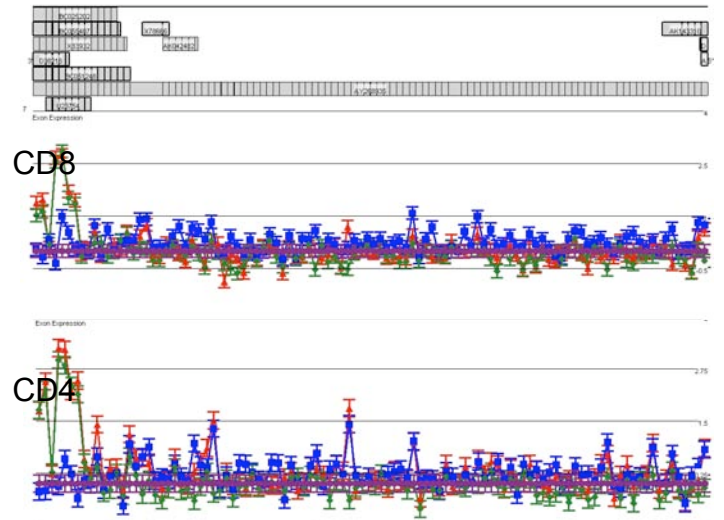

# Group C Genes

### Satb1 exons and transcripts

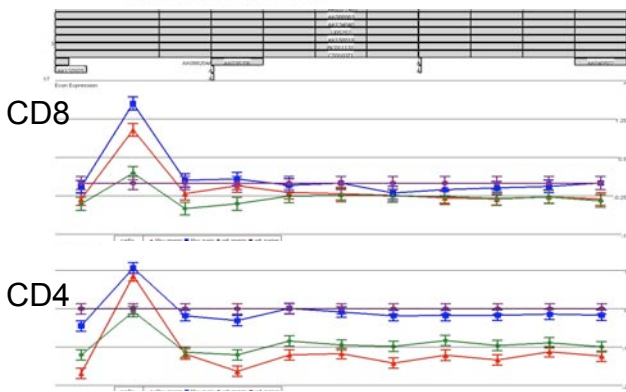

### Sept8 exons and transcripts

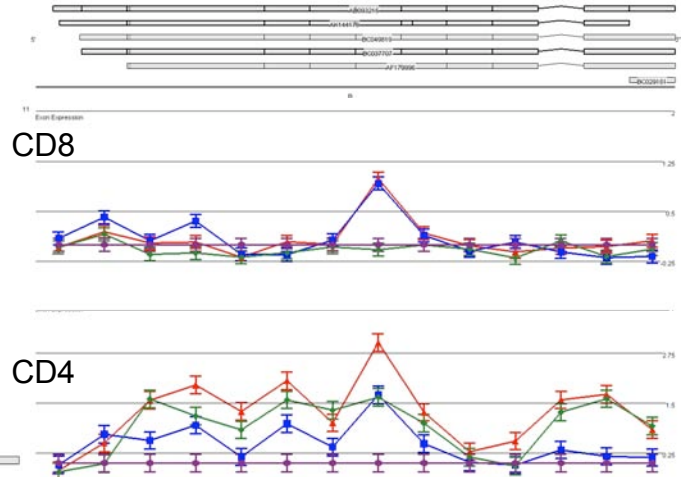

### Slc6a13 exons and transcripts

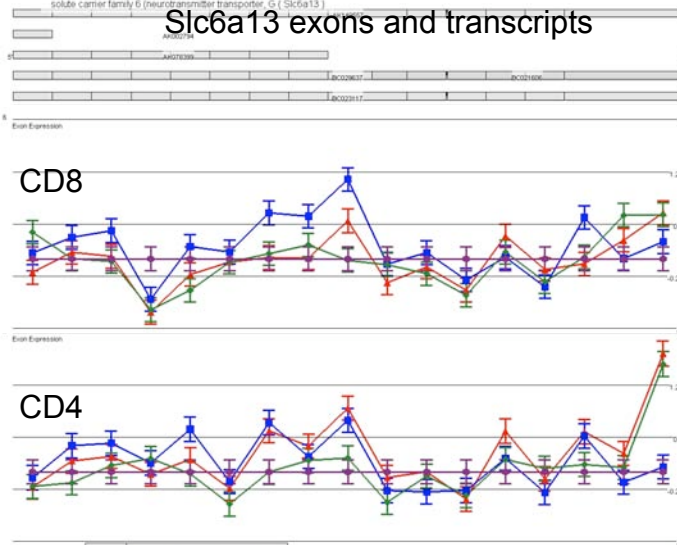

### Smarca4 exons and transcripts

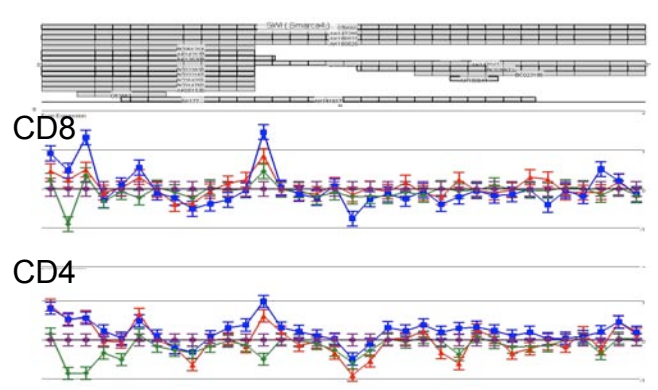

### Tchp exons and transcripts

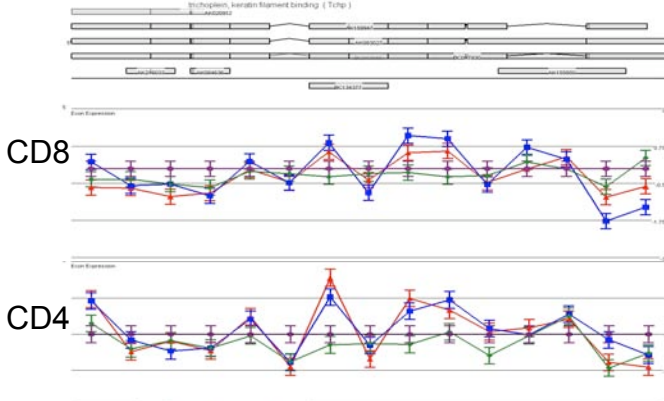

### Tgfa exons and transcripts

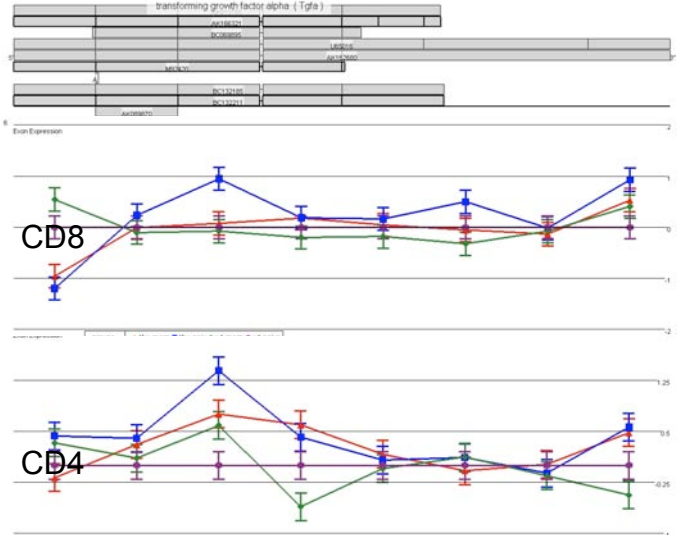

### Ttc26 exons and transcripts

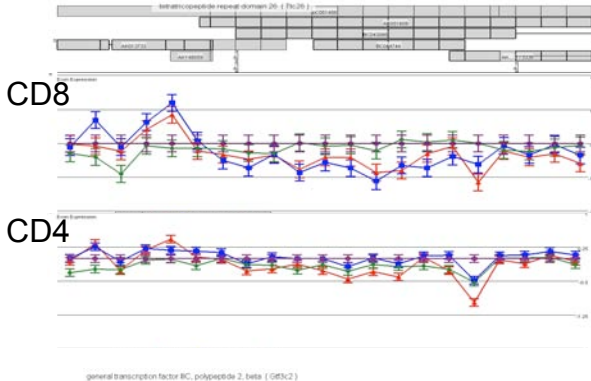

# Group C Genes

Ttpa exons and transcripts

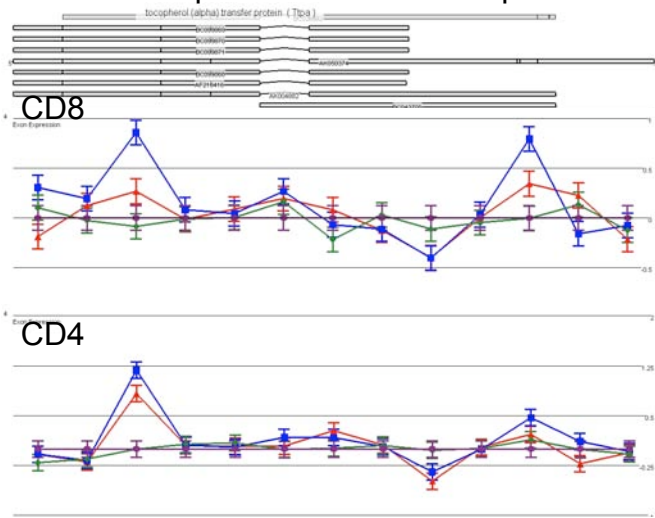

Txnrd3 exons and transcripts

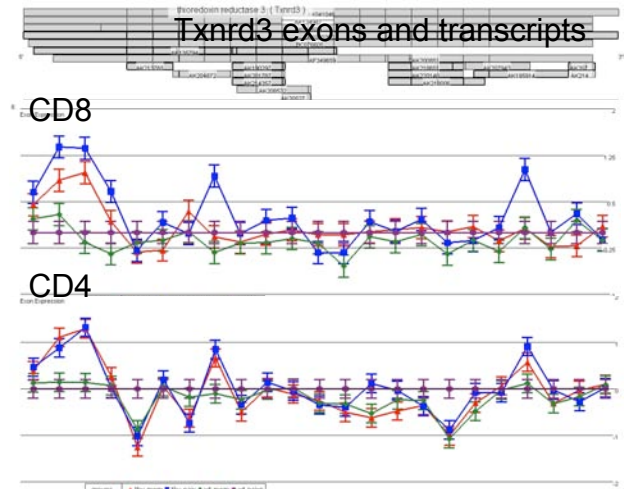

Uvrug exons and transcripts

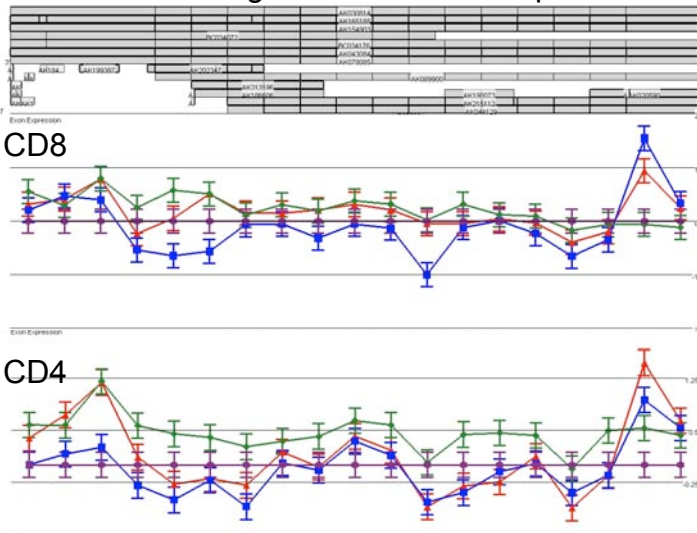

Vill exons and transcripts

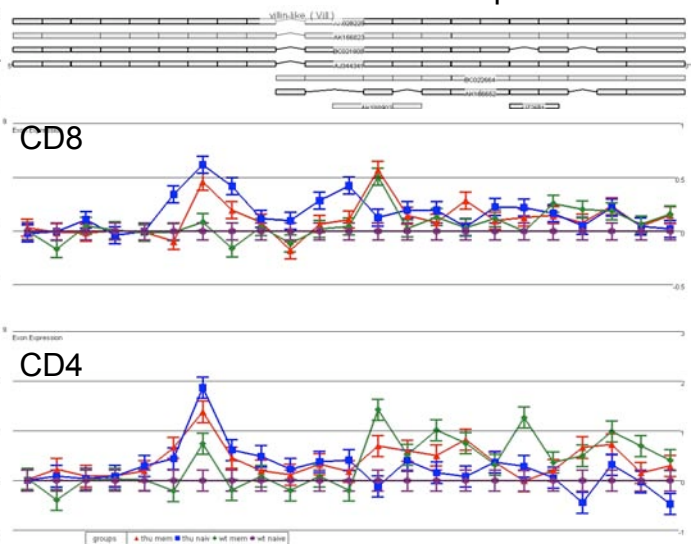



# Group D Genes

## 6330407J23Rik

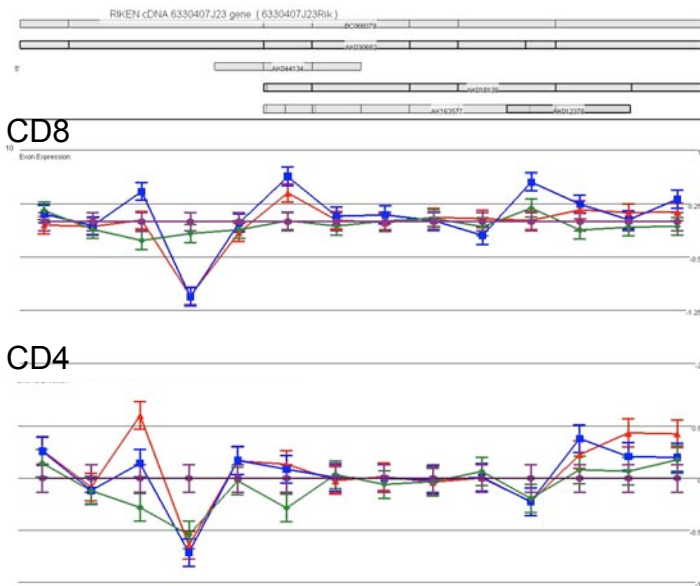

## C130038G02Rik exons and transcripts

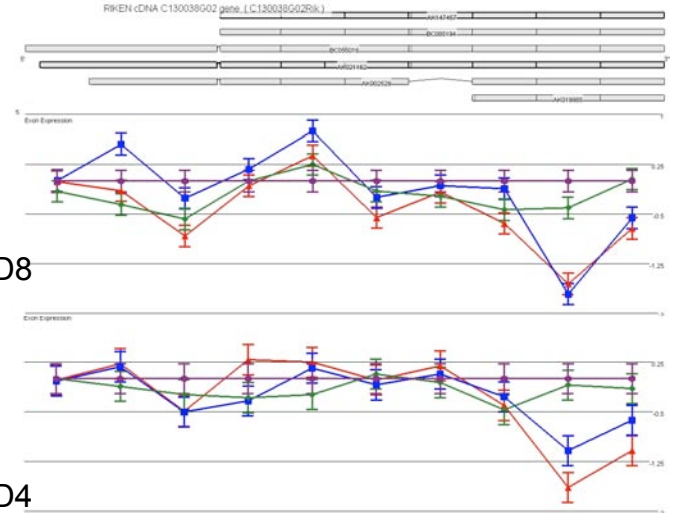

## LOC669840 = 2700097O09Rik

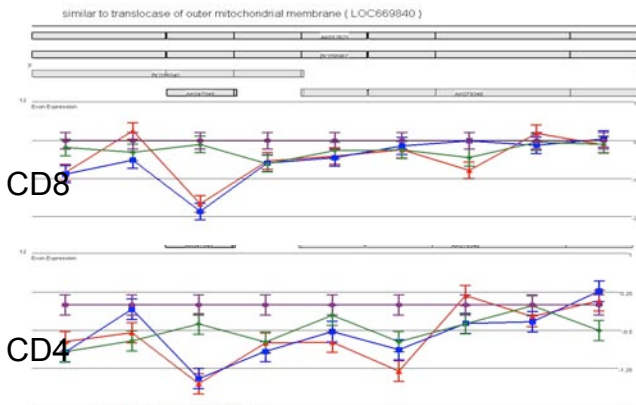

# Group D Genes

5730445M16 = Adcy7 This exon skipped in Homo & 5' half skipped in Bos

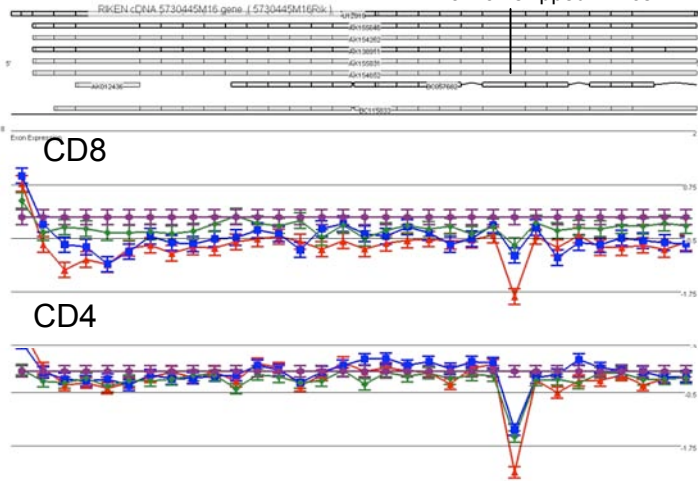

Apaf1 exons and transcripts

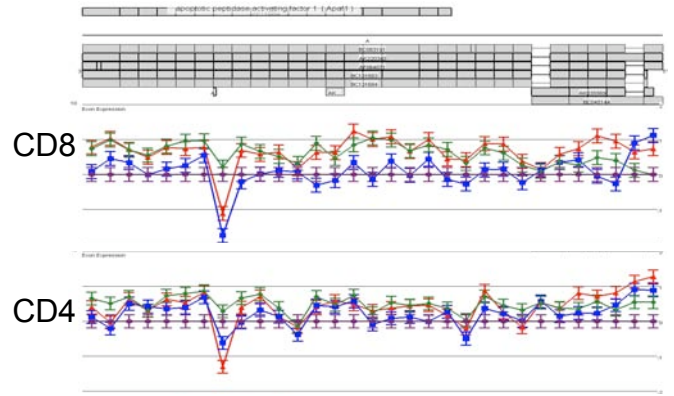

Cdc42pb exons and transcripts

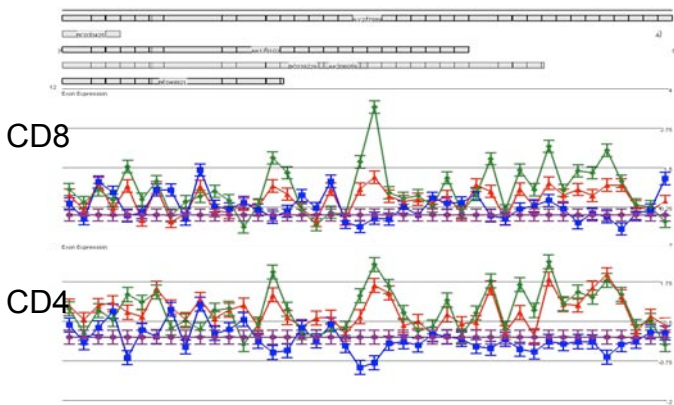

Chuk exons and transcripts

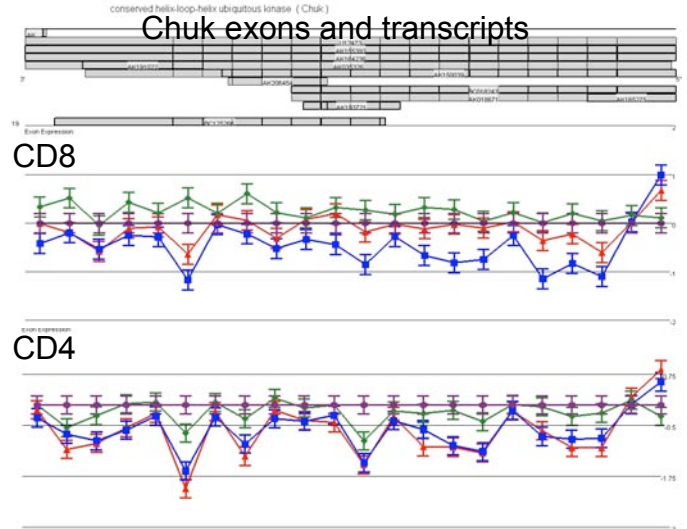

Col6a3 = LOC674521

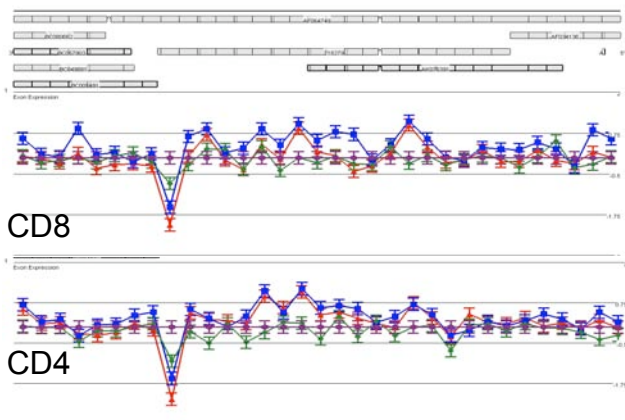

Dhx16 exons and transcripts

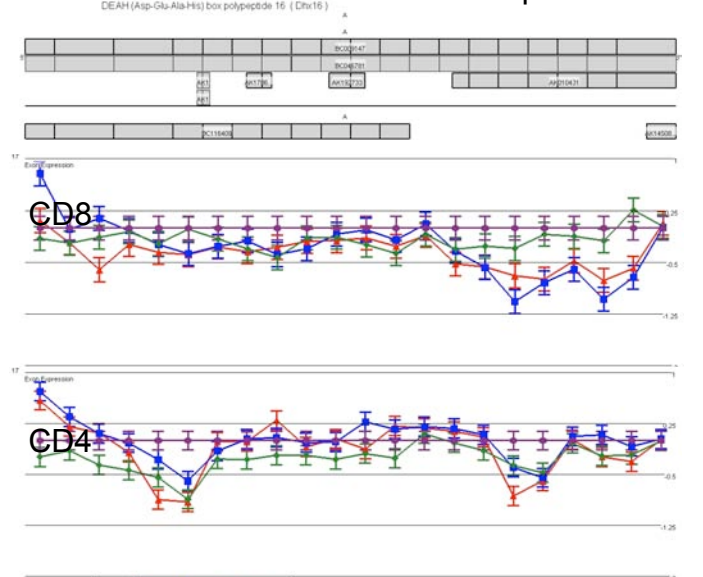

# Group D Genes

**Eif2ak3 exons and transcripts**

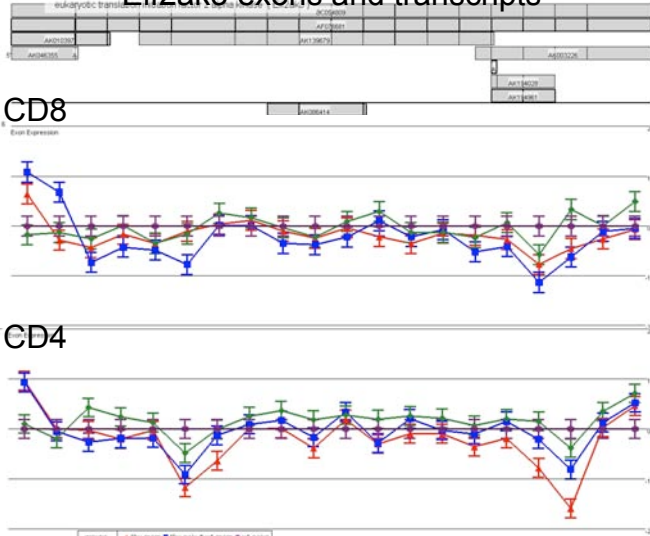

**Enpp2 exons and transcripts**

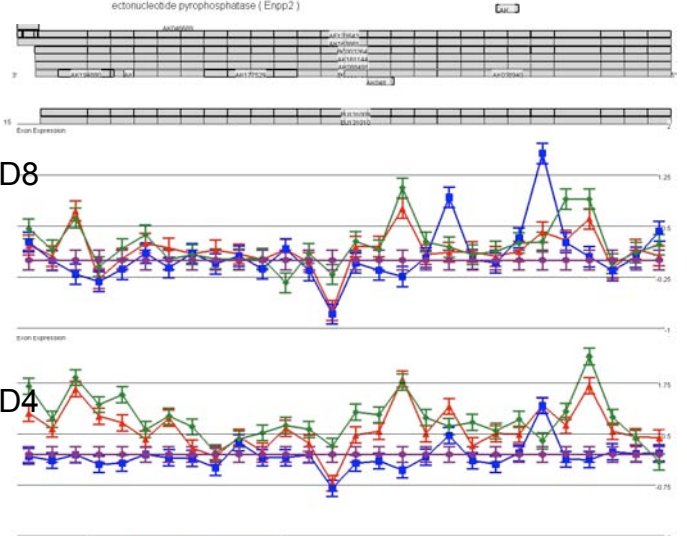

**Gemin5 exons and transcripts**

gem (nuclear organelle) associated protein 5 ( Gemin5 )

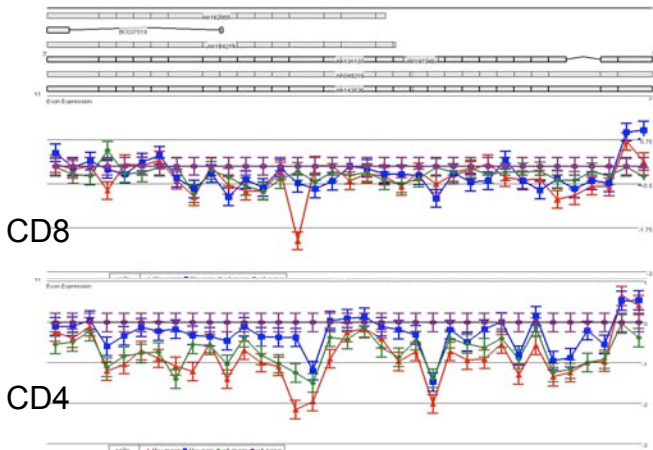

**LOC672575 = Gpr98**

hypothetical protein LOC672575 ( LOC672575 )

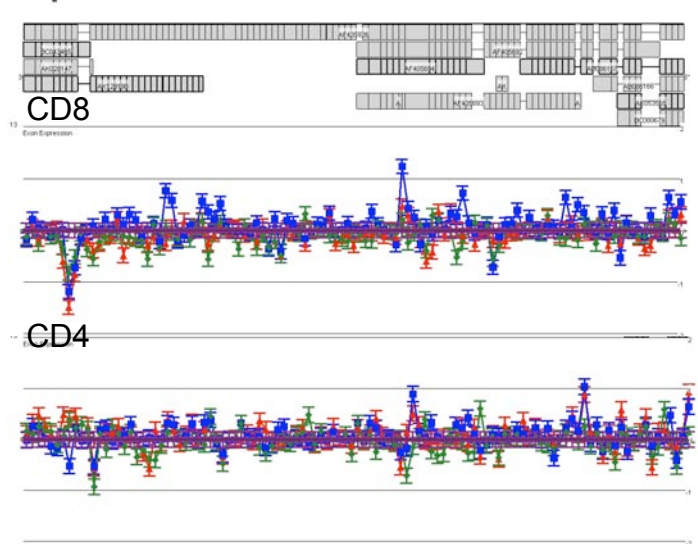

**Hyi exons and transcripts**

hydroxypyruvate isomerase homolog (E. coli) ( Hyi )

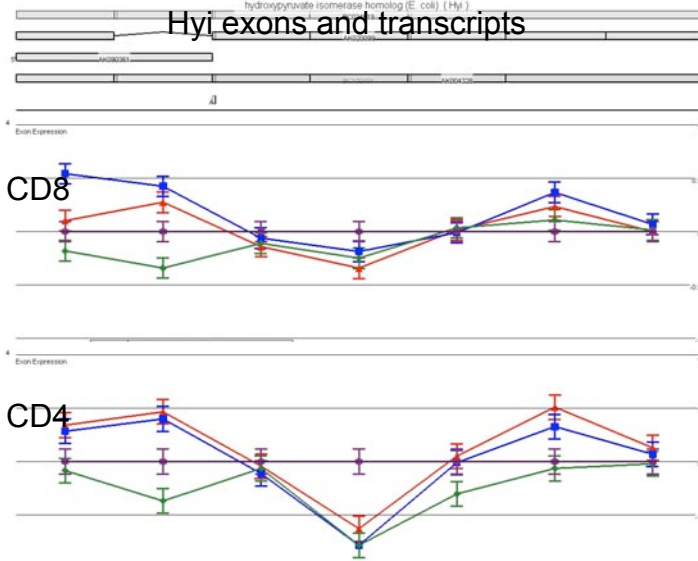

**LOC666054 = Gtf2a1**

similar to general transcription factor Ia precursor ( LOC666054 )

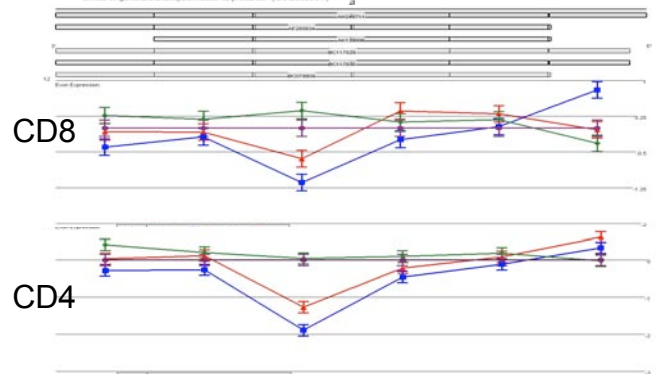

# Group D Genes

## Lztr1 exons and transcripts

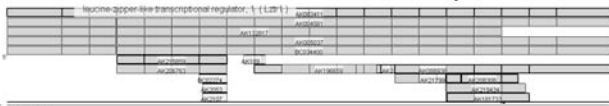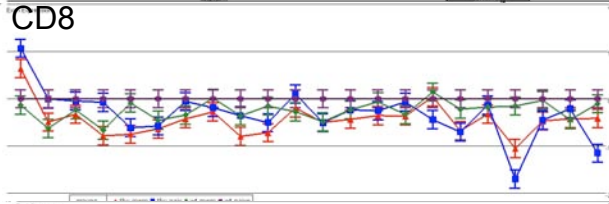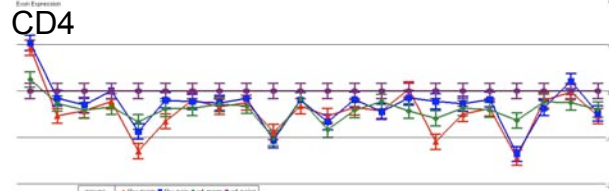

## Nf1 exons and transcripts

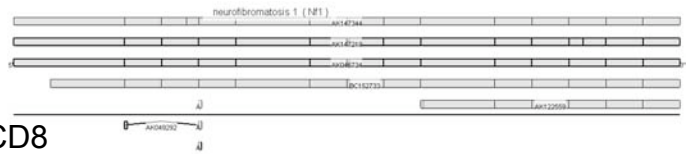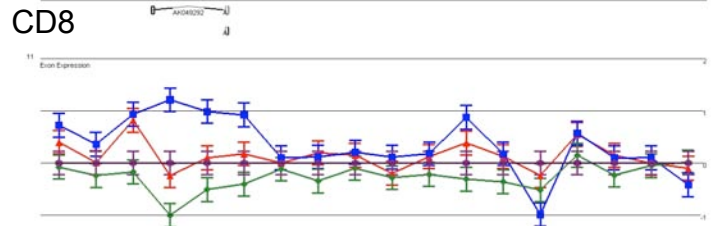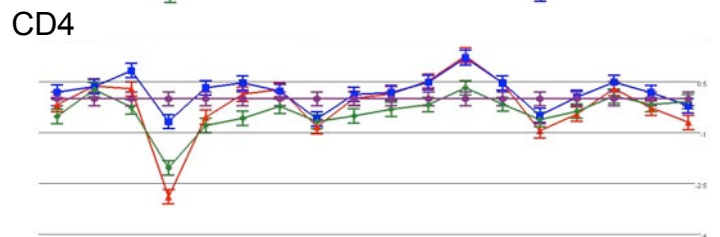

## Nxf1 exons and transcripts

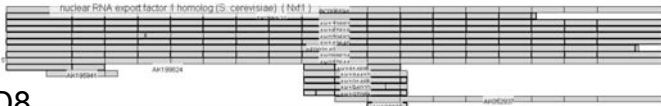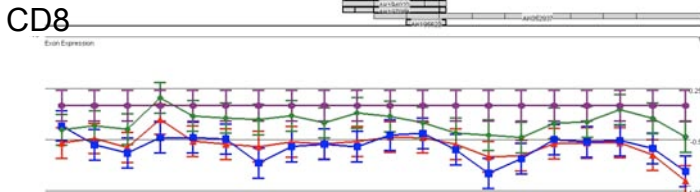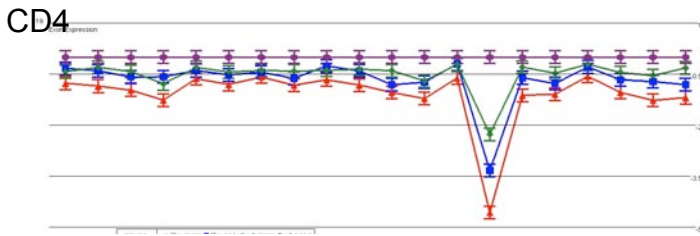

# Group D Genes

## Pip5k3 exons and transcripts

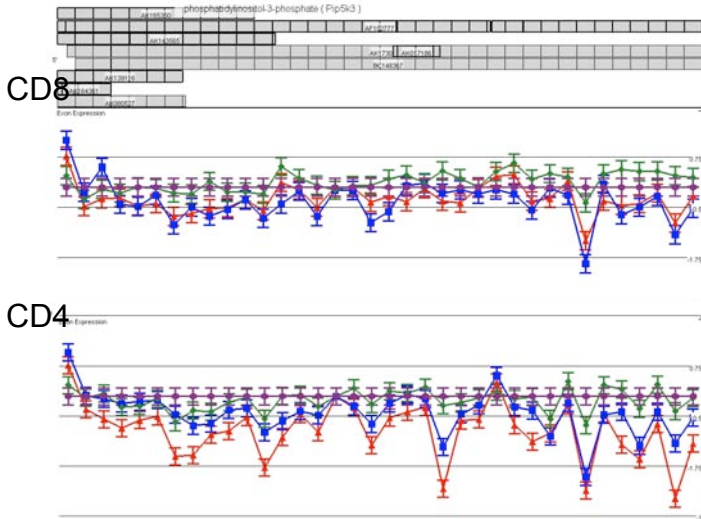

## Ppm1e exons and transcripts

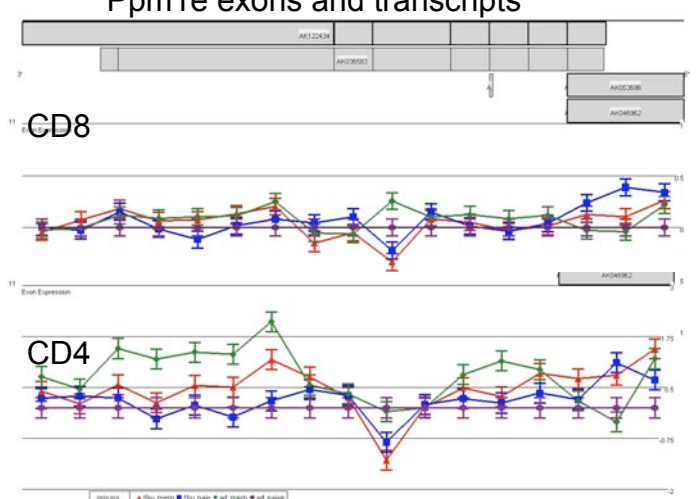

## Rbbp6 exons and transcripts

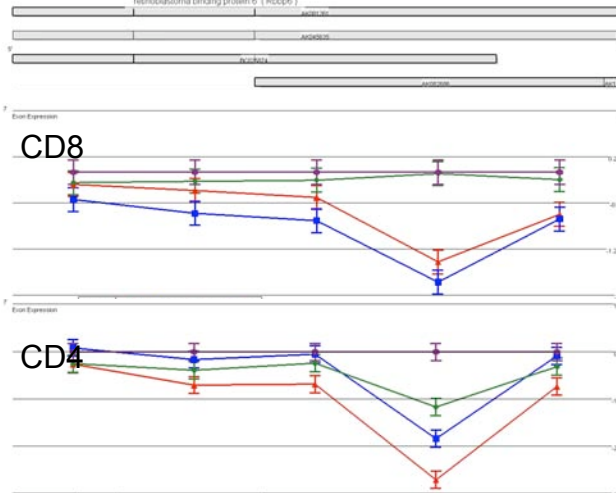

## Sspo exons and transcripts

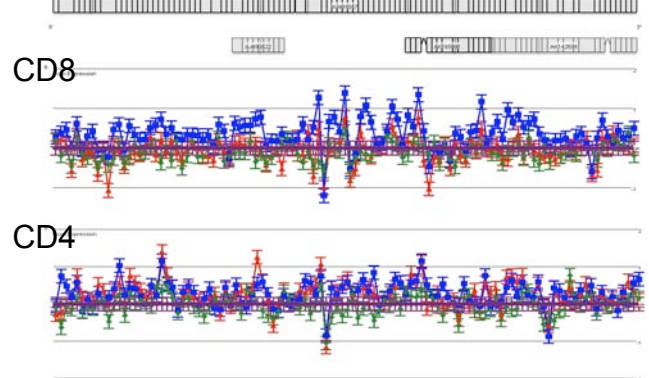

## Stt3b exons and transcripts

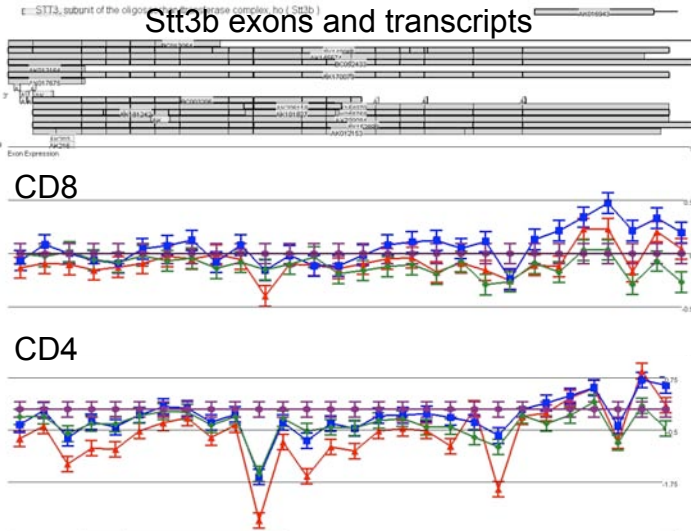

## Tgn exons and transcripts

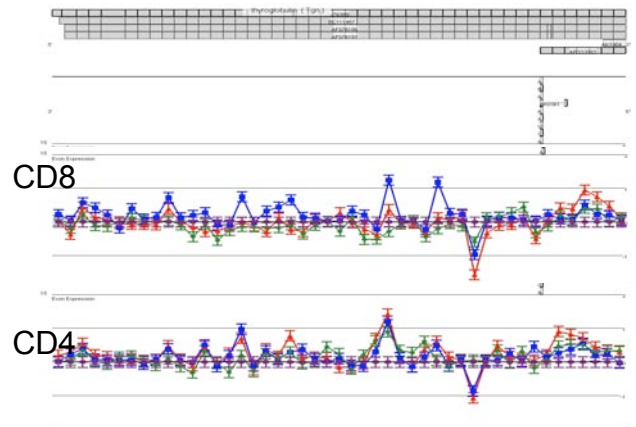

# Group D Genes

Thada exons and transcripts

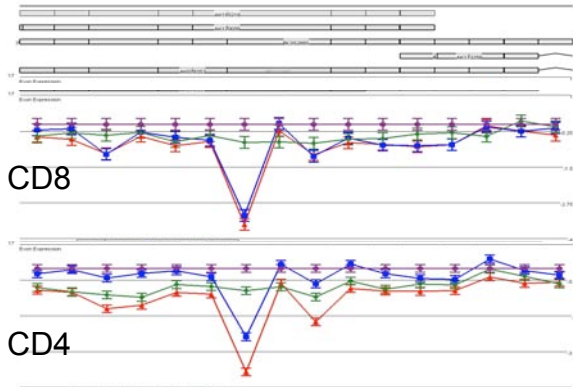

Tnks exons and transcripts

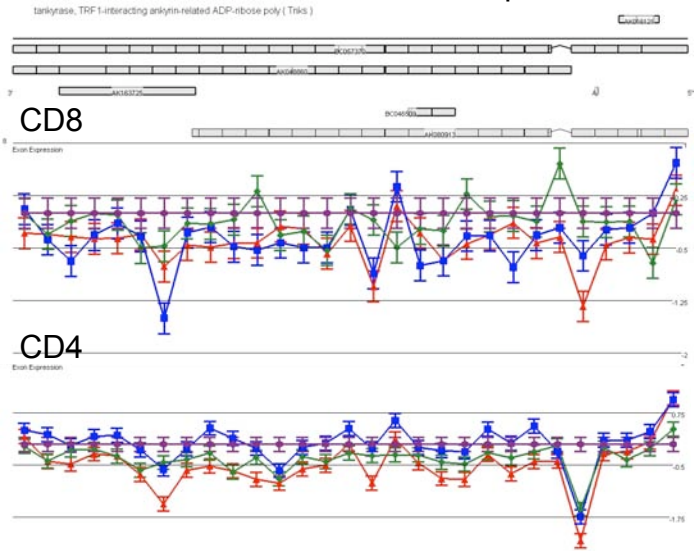

Tsga10 exons and transcripts

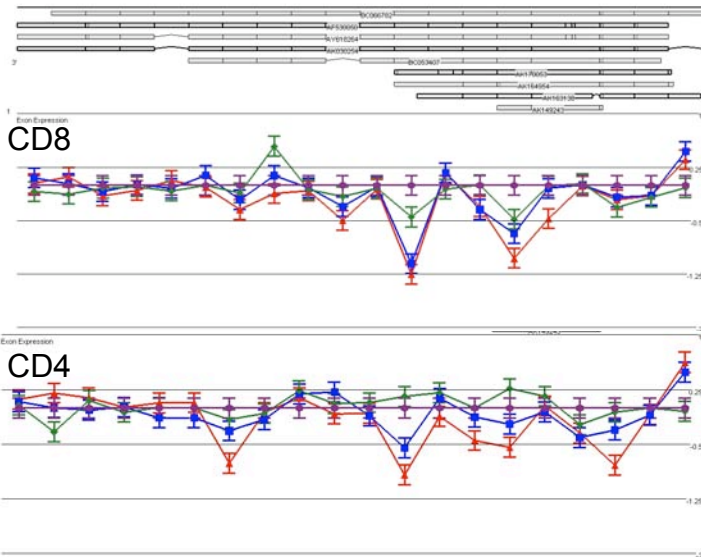

Ugcg exons and transcripts

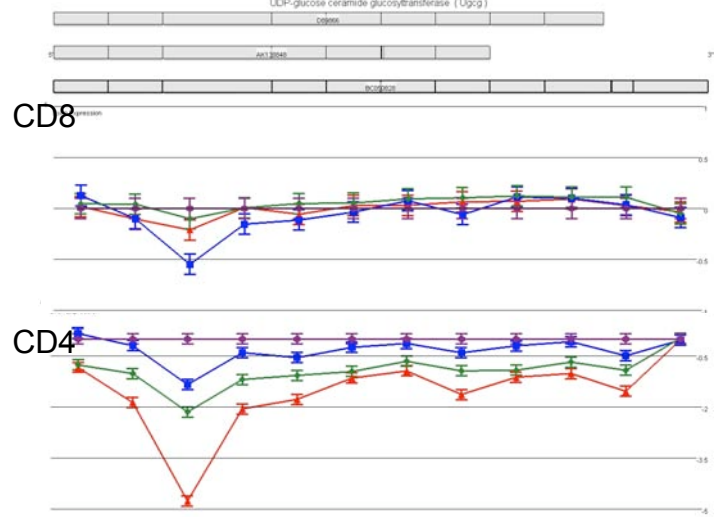

Vapa exons and transcripts

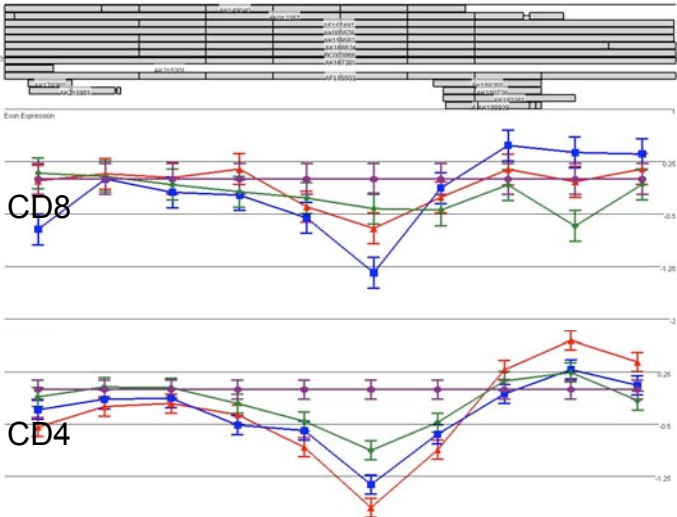

Wdtdc1 exons and transcripts

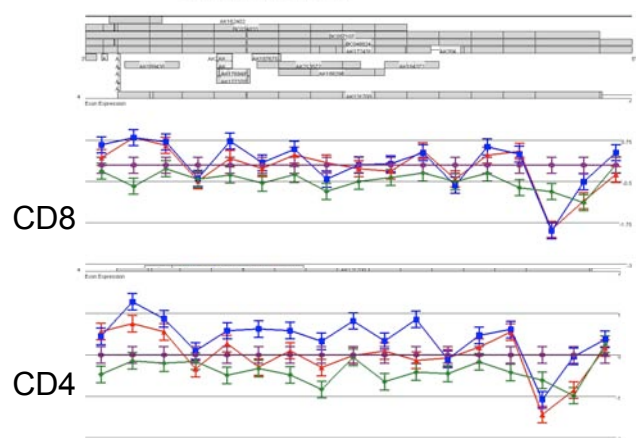

# Group D Genes

Zfp592 exons and transcripts

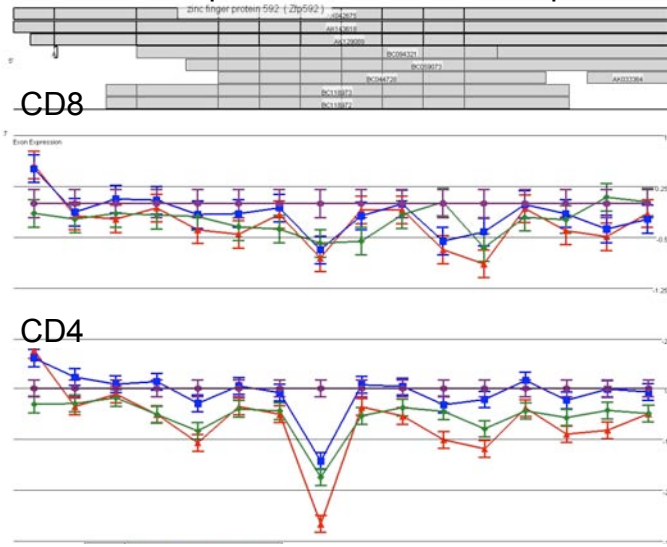

Zfp593 exons and transcripts

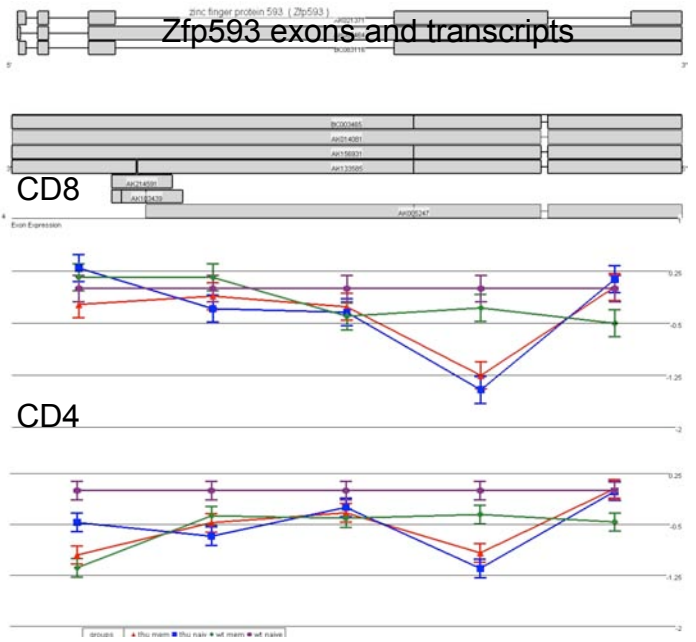

3000002G13Rik = Zfp619

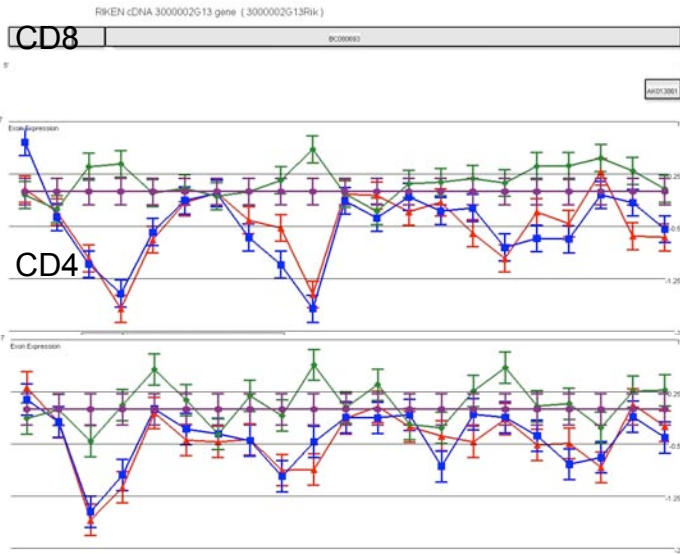

# Group E Gene Views

## 2610024G14Rik exons and transcripts

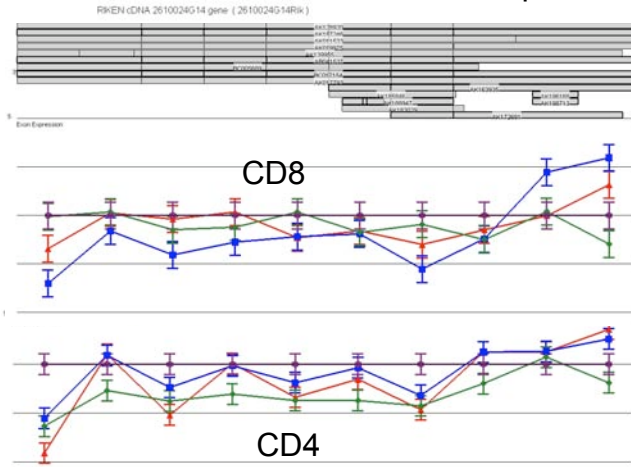

## 2700050L05Rik exons and transcripts

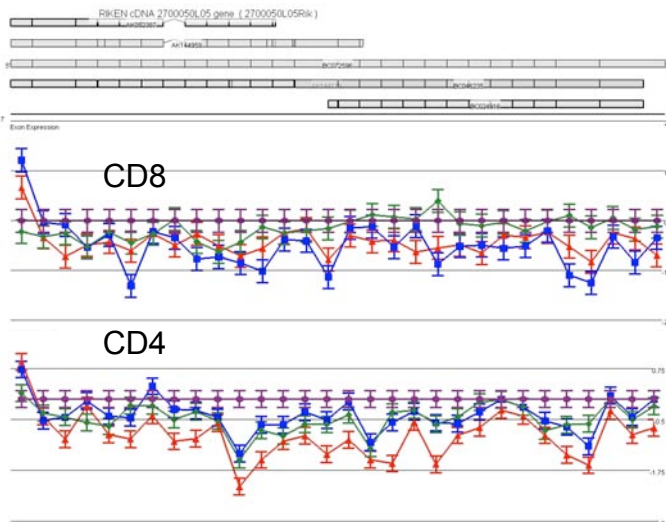

## 3732413I11Rik exons and transcripts

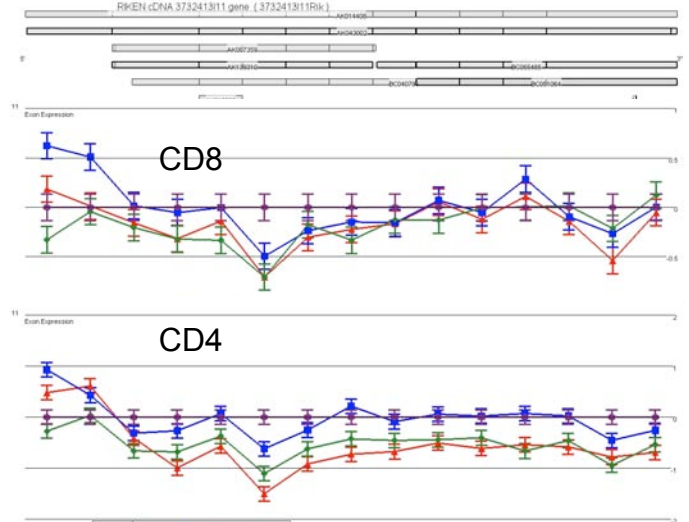

## A930041I02Rik exons and transcripts

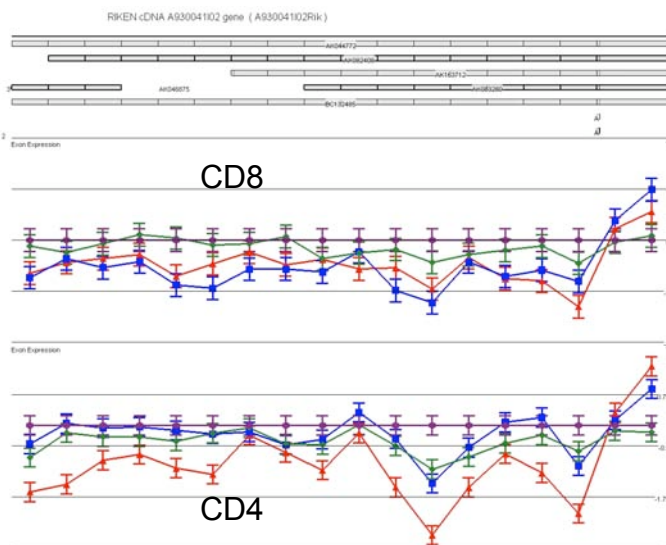

## Acads exons and transcripts

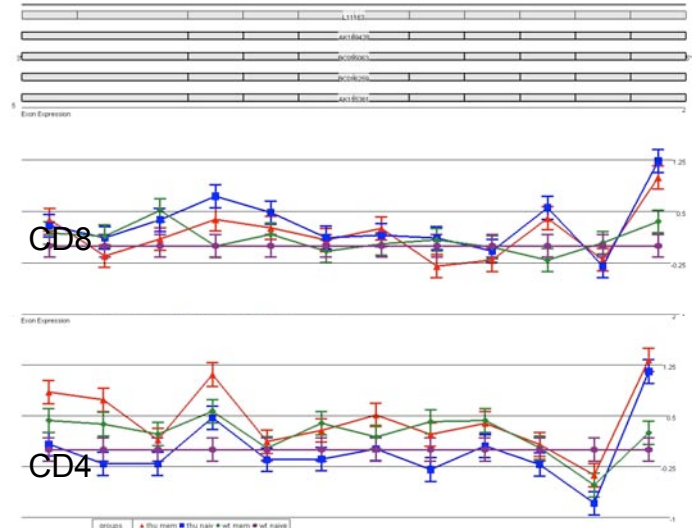



### Af397014 exons and transcripts

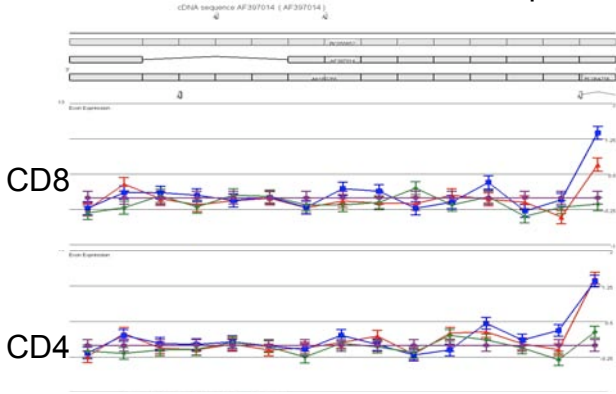

K03228, J02995 and others initiate at an alternative 3' promoter = Abl type IV cDNA **Abl1**

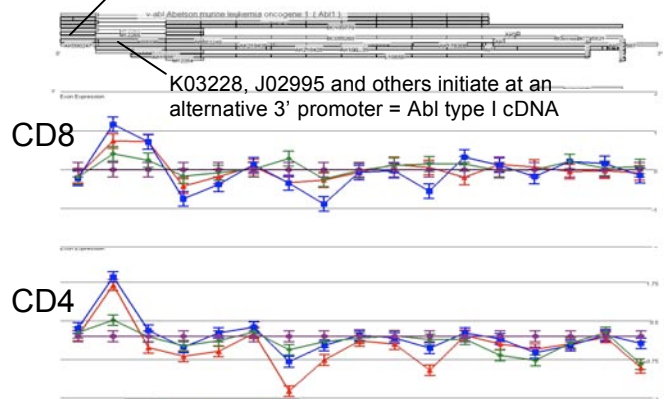

### Aftph exons and transcripts

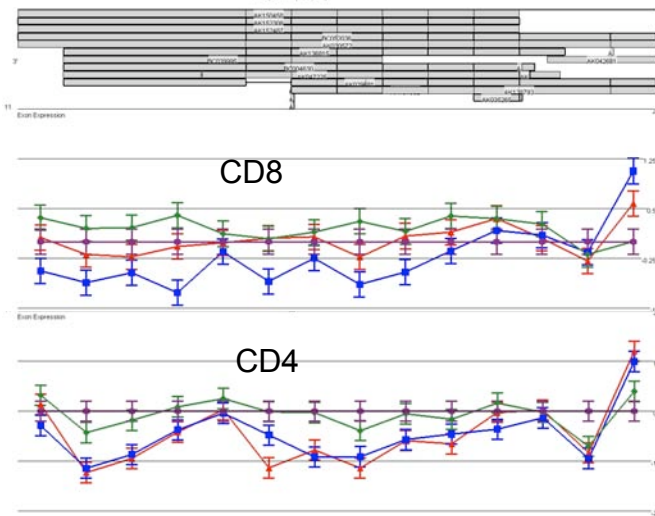

### Als2cl exons and transcripts

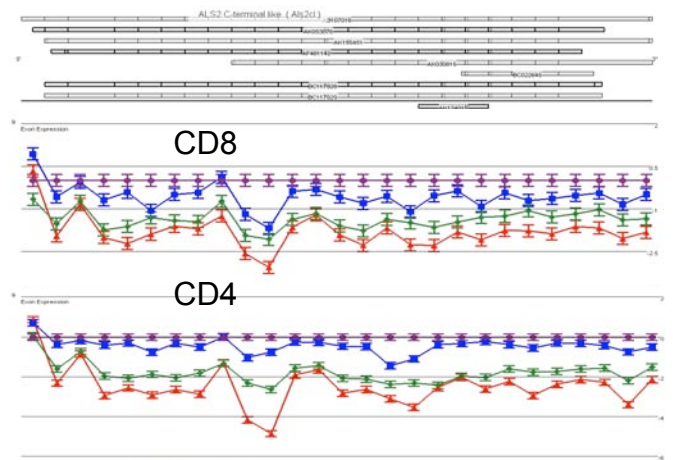

### Atrn exons and transcripts

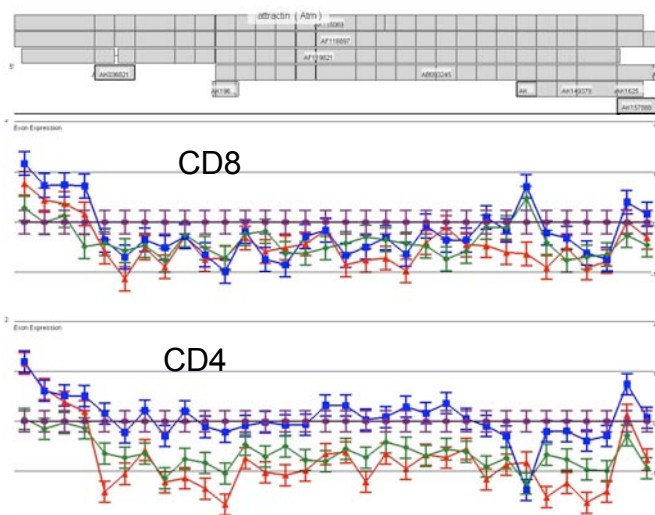

### B230219D22Rik exons and transcripts

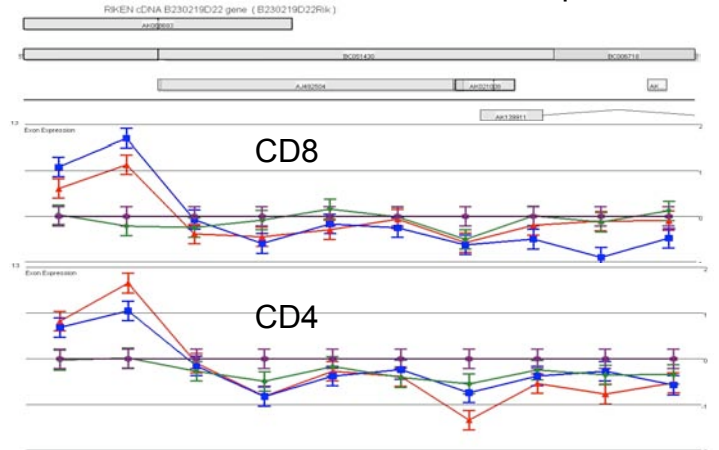

### B3gnt7 exons and transcripts

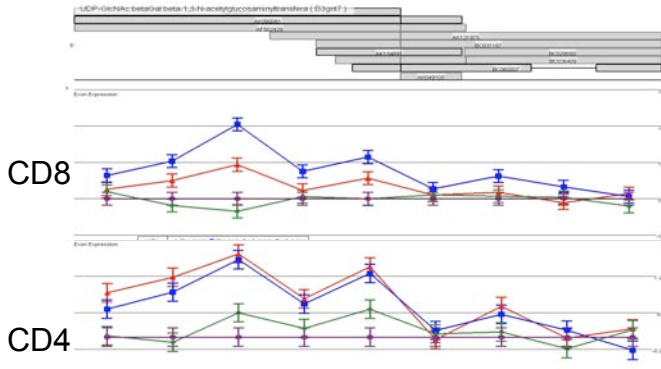

### Baz1a exons and transcripts

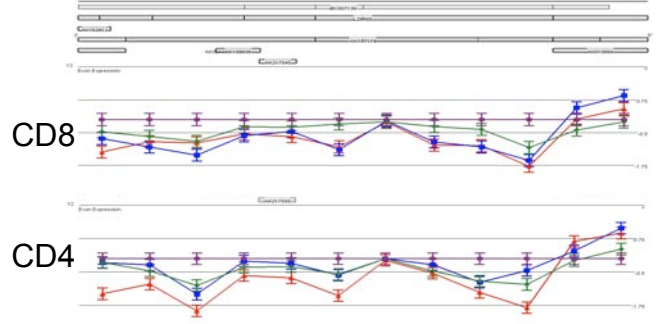

### Cacna2d3 exons and transcripts

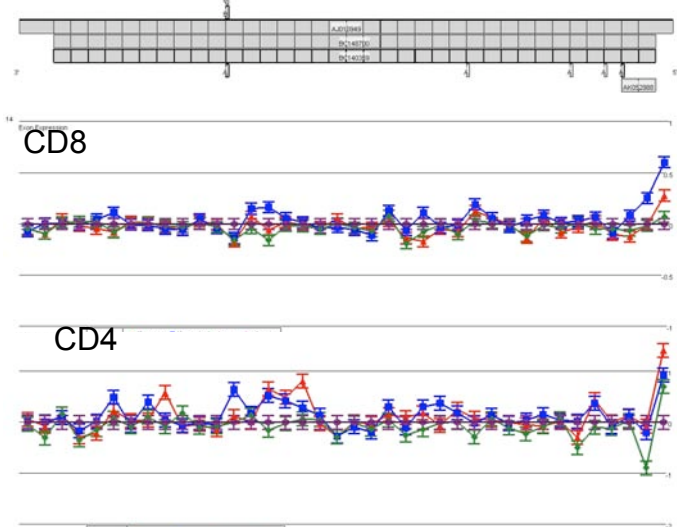

### Cald1 exons and transcripts

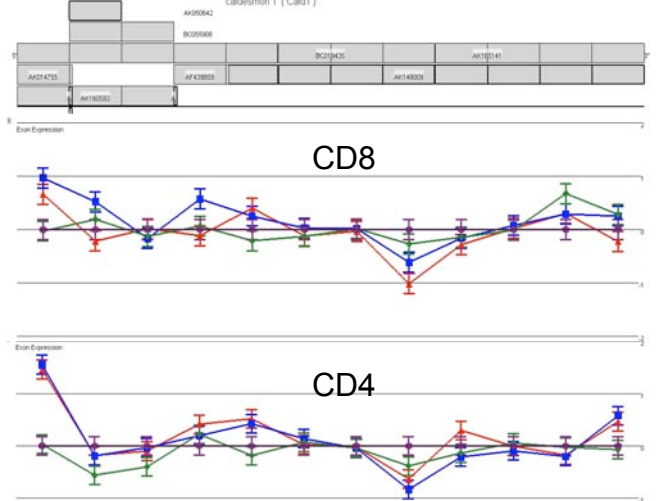

### Ccdc41 = 4921537D05Rik

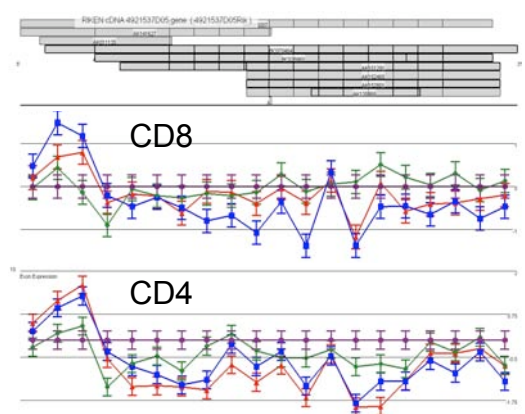

### Cecr5 exons and transcripts

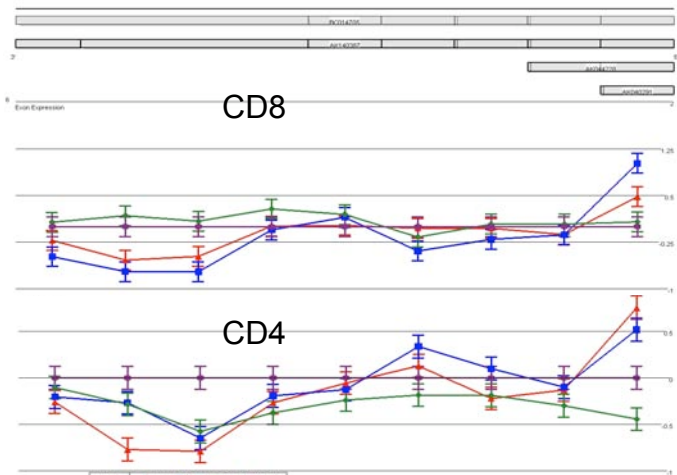

### Col8a2 exons and transcripts

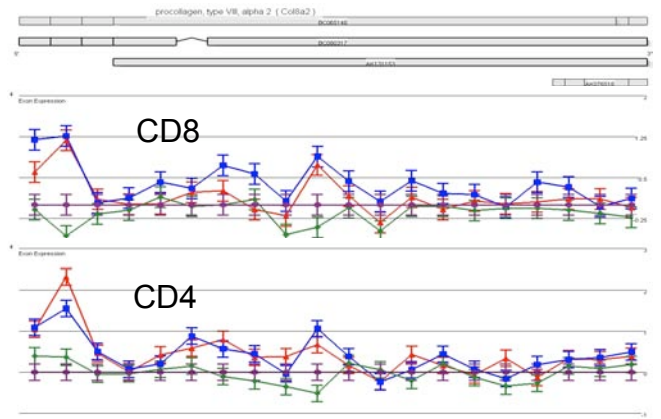

### Csf1r exons and transcripts

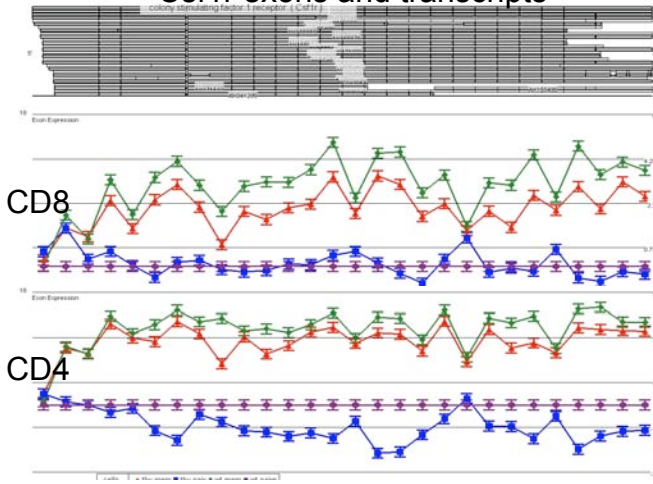

### Ctbp1 exons and transcripts

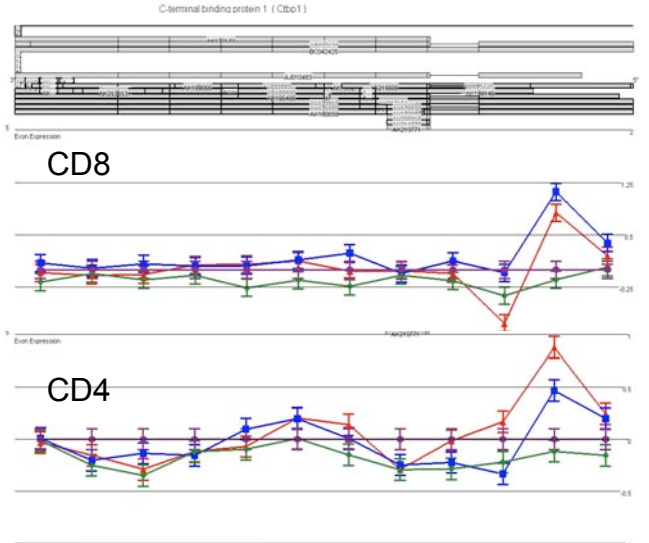

### Cyc1 exons and transcripts

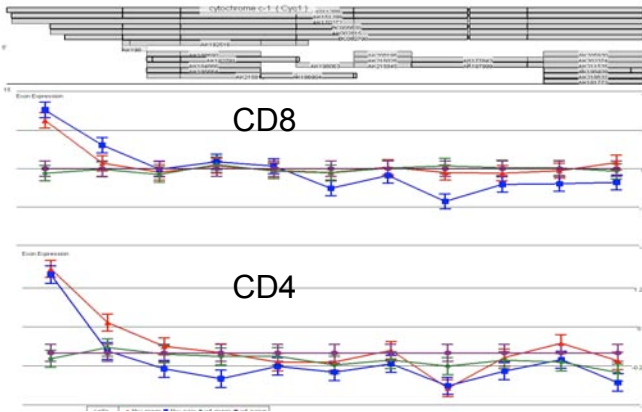

### D4Erd196e exons and transcripts

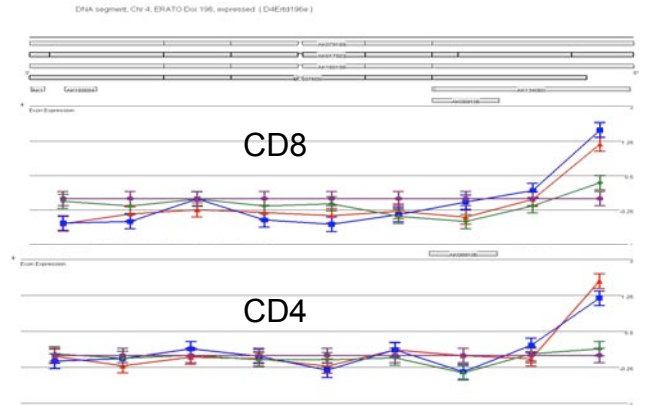

### D5Erd615e exons and transcripts

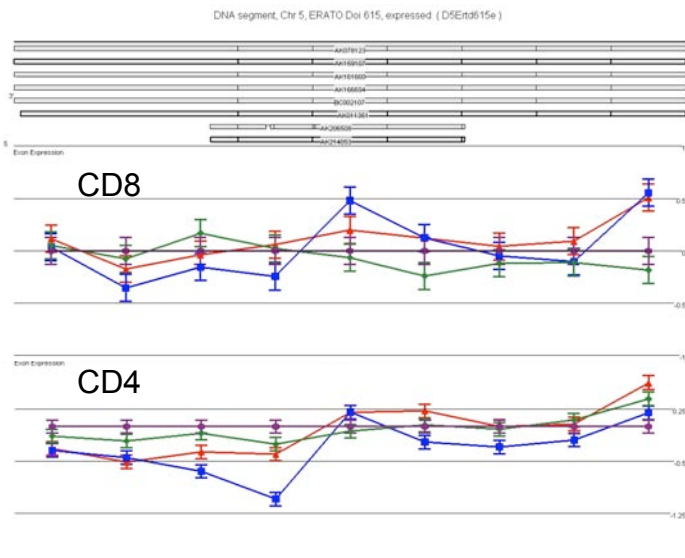

### Ddx42 exons and transcripts

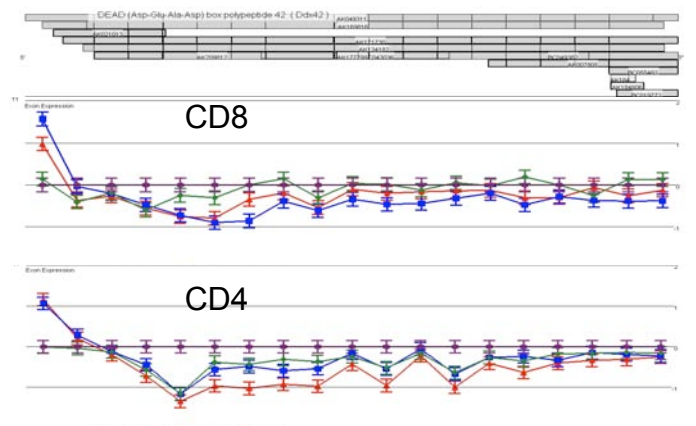

### Dhx35 exons and transcripts

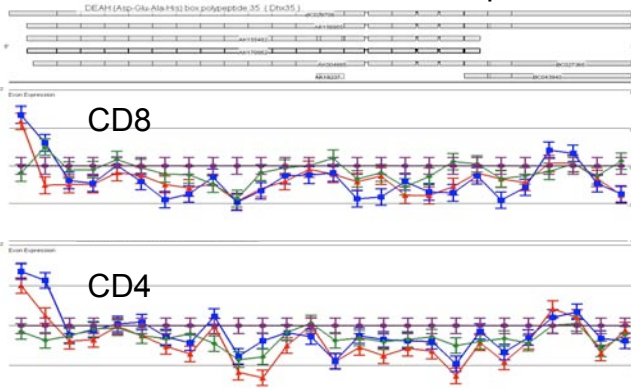

### Dnajc6 exons and transcripts

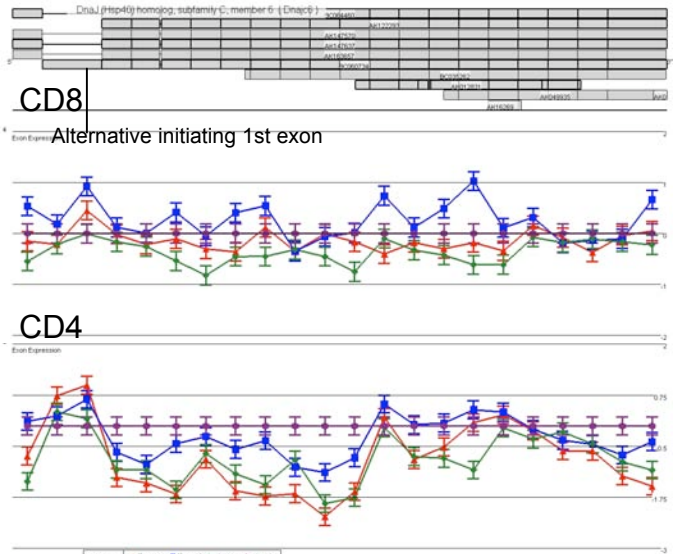

### Dsg2 = LOC640723

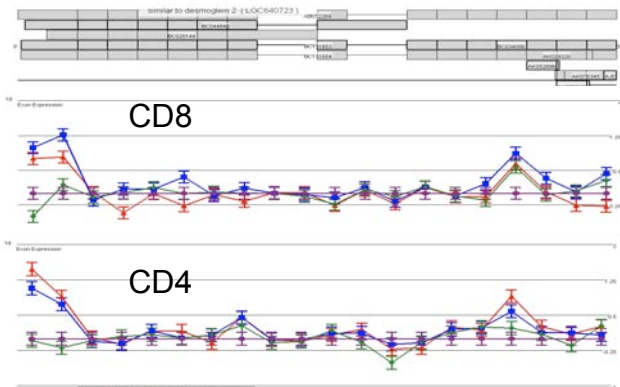

### Epb4.115

Alternative promoters and 1st exon, conserved in rat

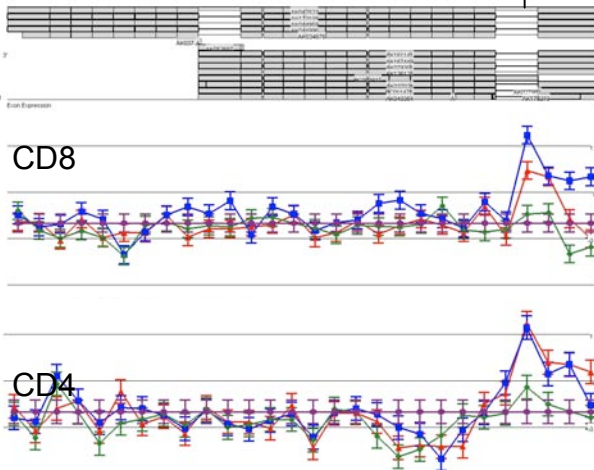

### Erc5 exons and transcripts

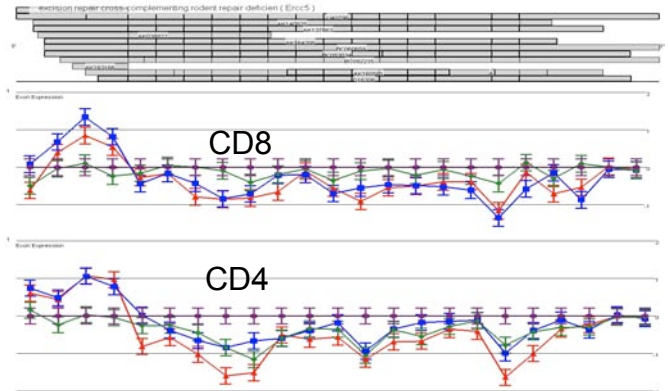

### Gabbr1

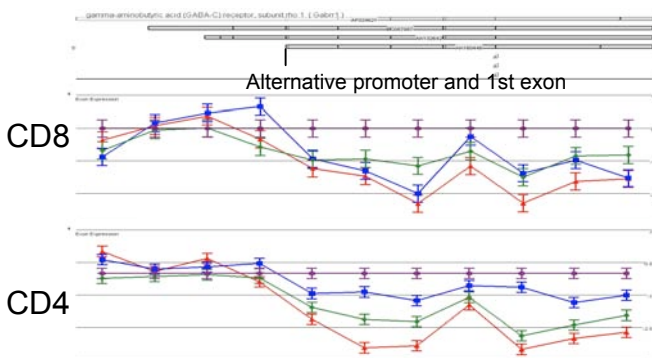

### Galnt2 exons and transcripts

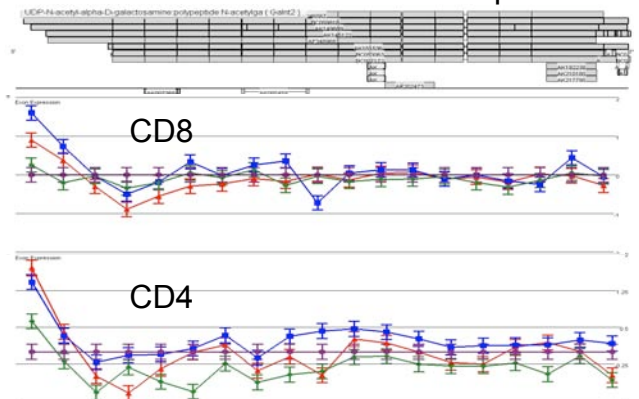

### Gbas exons and transcripts

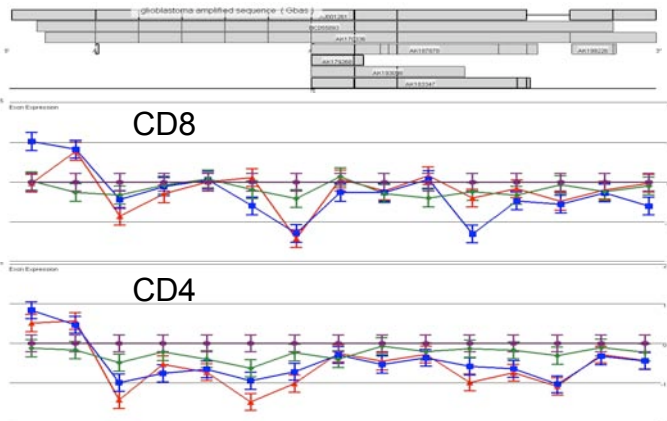

### Gdap2 exons and transcripts

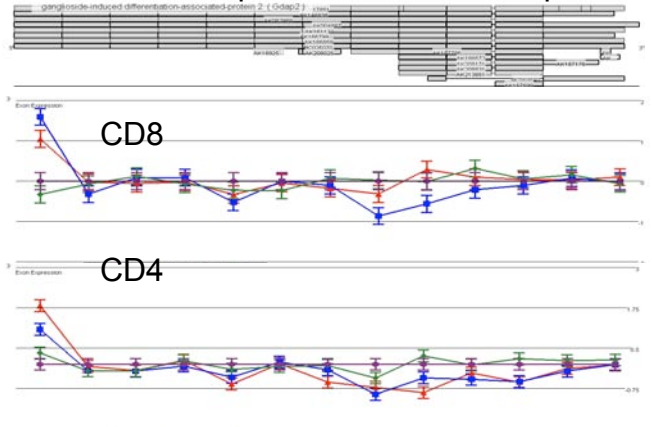

### Gns

Alternative internal promoter

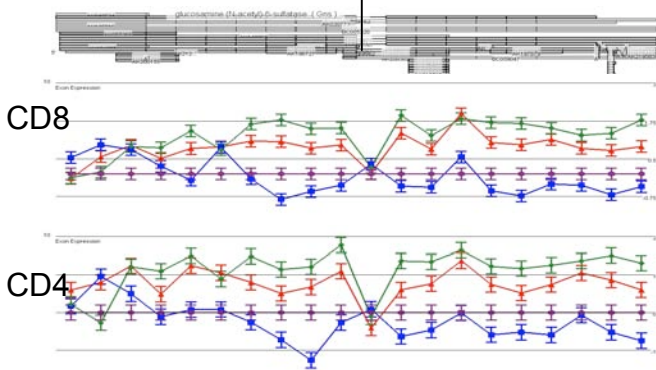

### Hel308 exons and transcripts

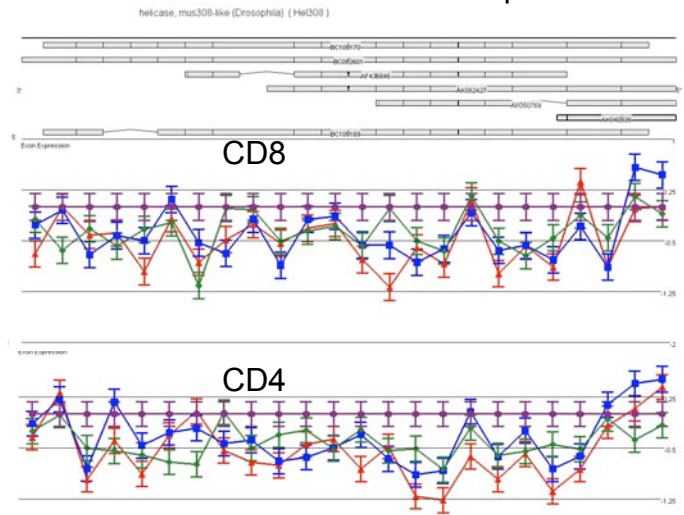

### Hint1 exons and transcripts

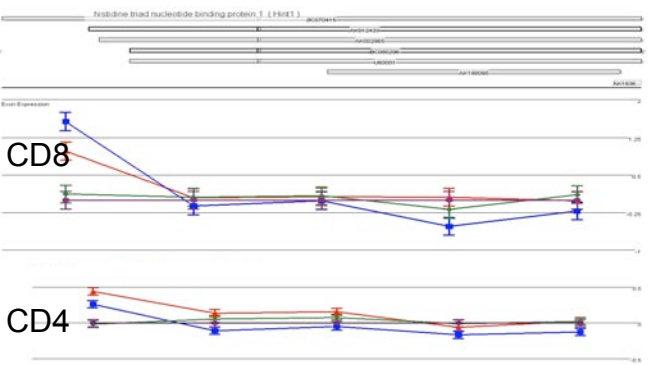

### LOC382645 = Tle6

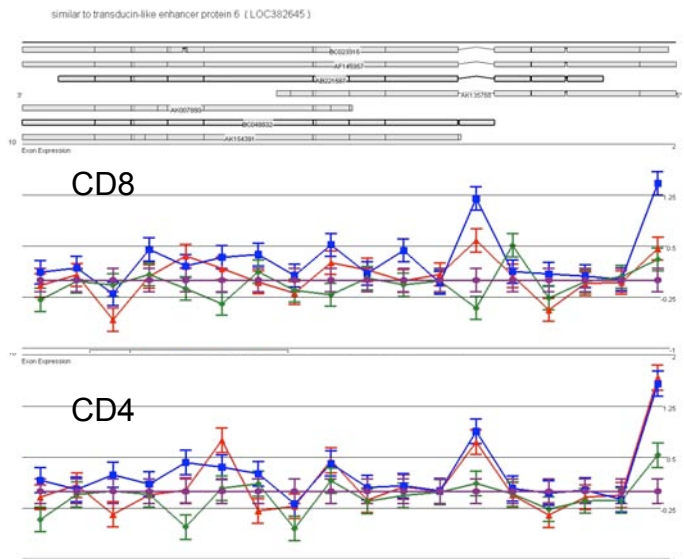

### LOC626061 exons and transcripts

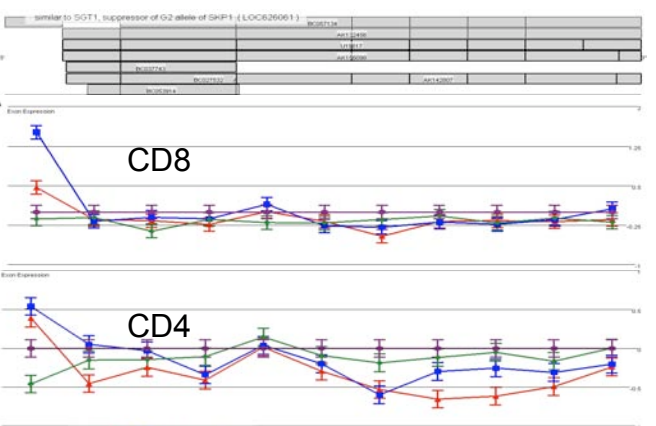

similar to isoleucine-tRNA synthetase 2, mitochondrial ( LOC636969 )

### LOC636969 exons and transcripts

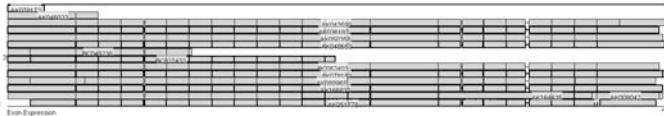

CD8

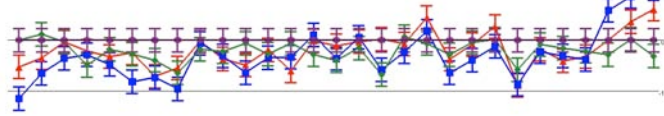

CD4

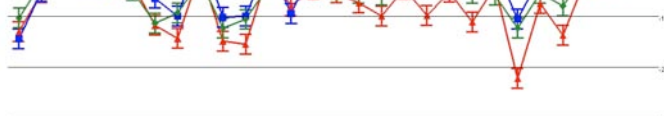

### LOC671134 exons and transcripts

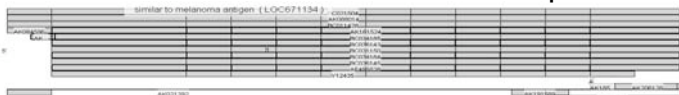

CD8

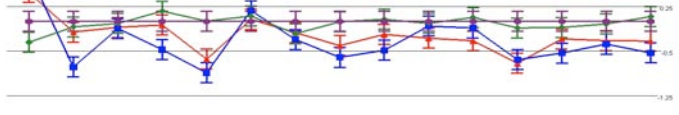

CD4

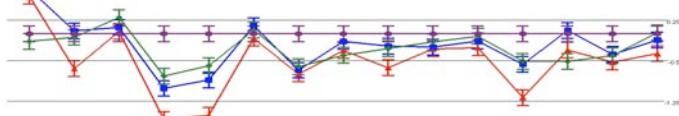

### LOC670148 exons and transcripts

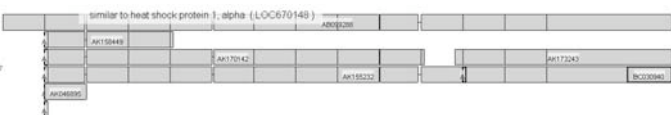

CD8

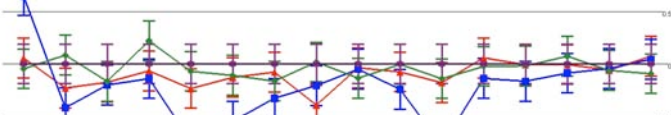

CD4

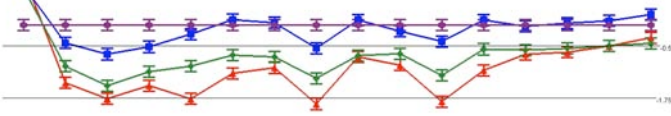

### Dsg2 = LOC640723

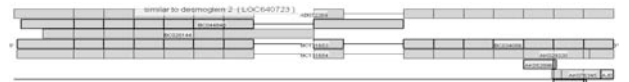

CD8

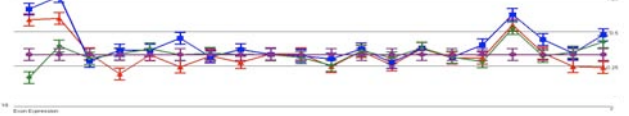

CD4

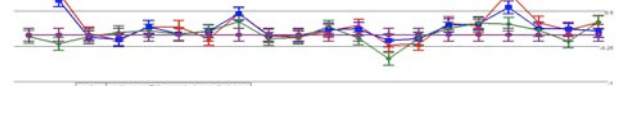

### LOC666185 exons and transcripts

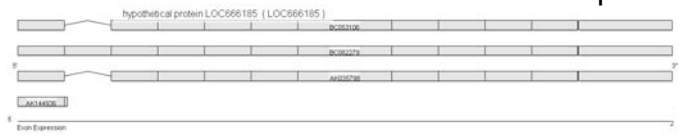

CD8

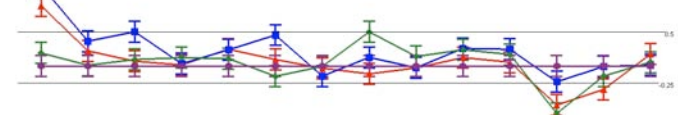

CD4

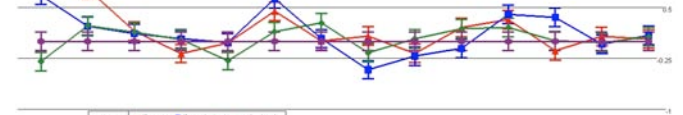

### Mcp1 exons and transcripts

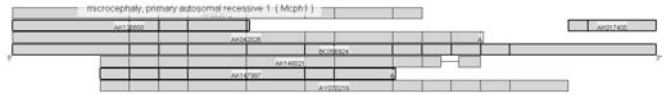

CD8

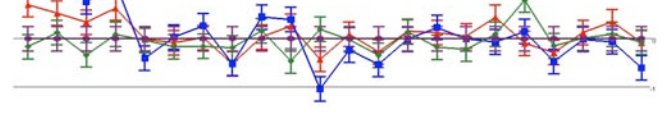

CD4

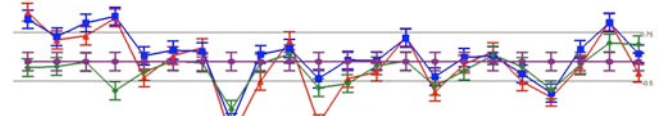

### Metap1 exons and transcripts

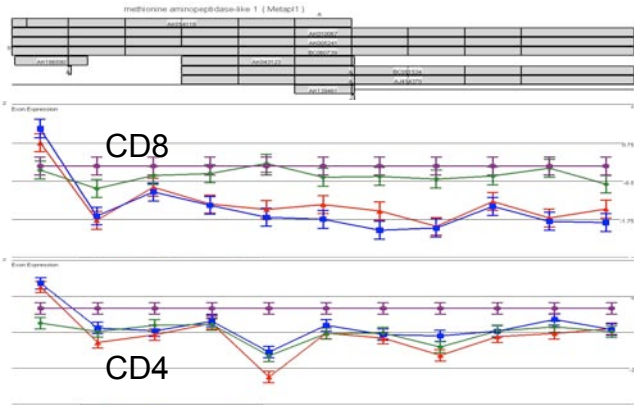

### Nnp1 exons and transcripts

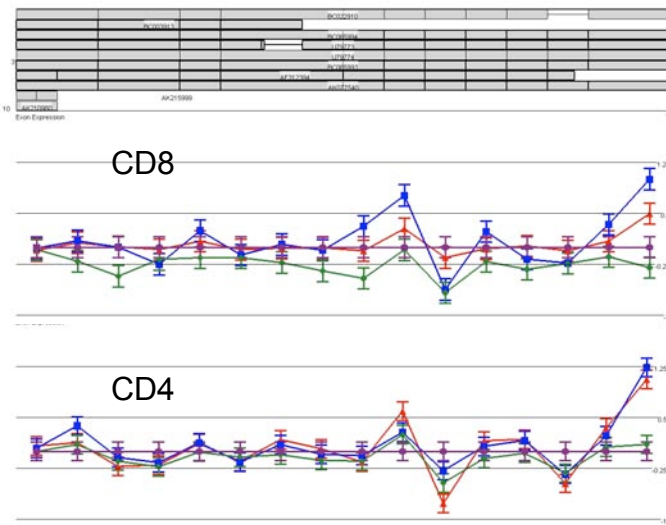

### Pabpn1 exons and transcripts

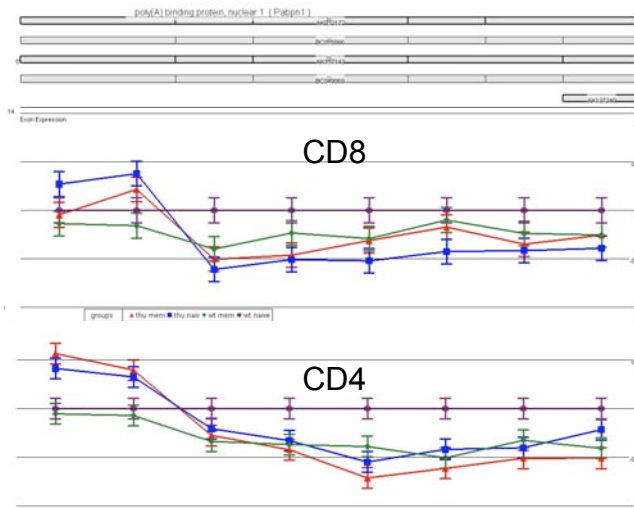

### Metrn

Alternative 3' promoter in 1st intron of BC12177 & other ESTs like it

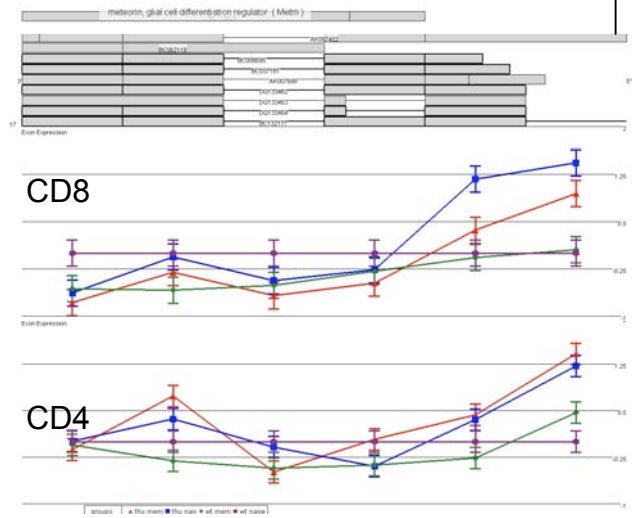

### Mthfsd

Alternative exon 3  
Alternative promoters

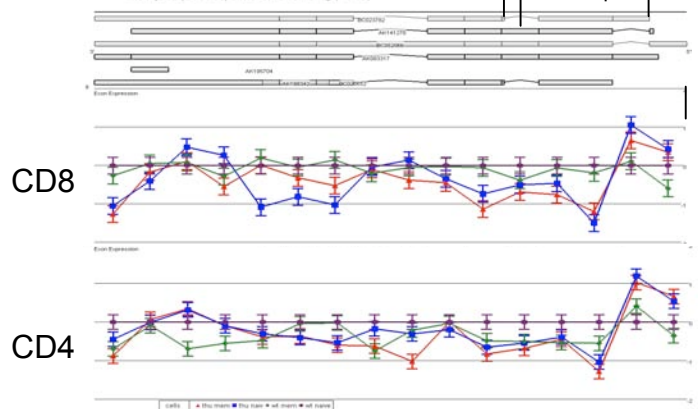

### Pcdh21 exons and transcripts

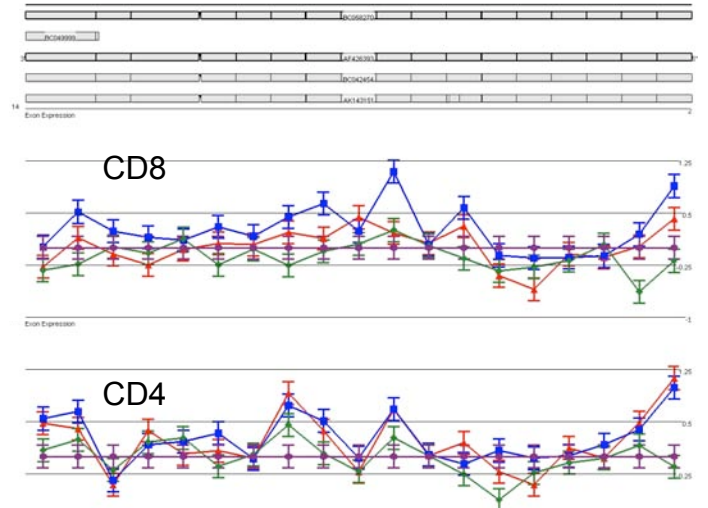

### Pcdhac1 locus

Staggered transcript starts represent alternative promoters and first exons

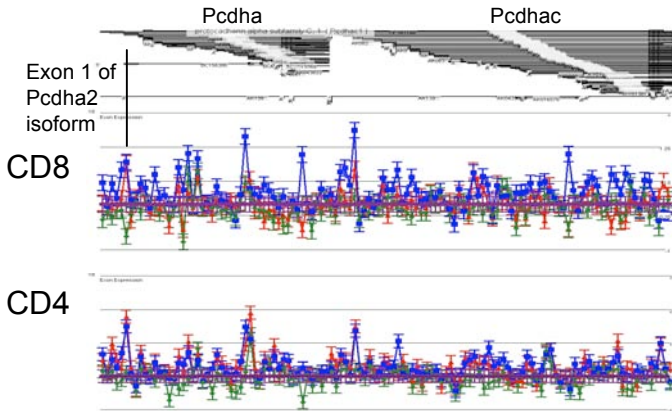

### Phka2 exons and transcripts

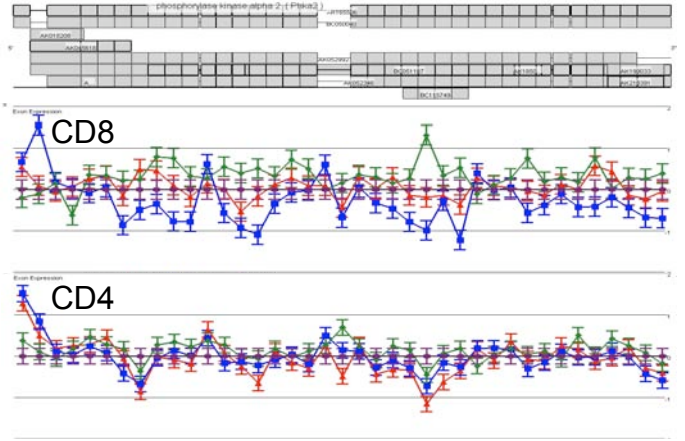

### Polr3d exons and transcripts

polymerase (RNA) II (DNA directed) polypeptide D ( Polr3d )

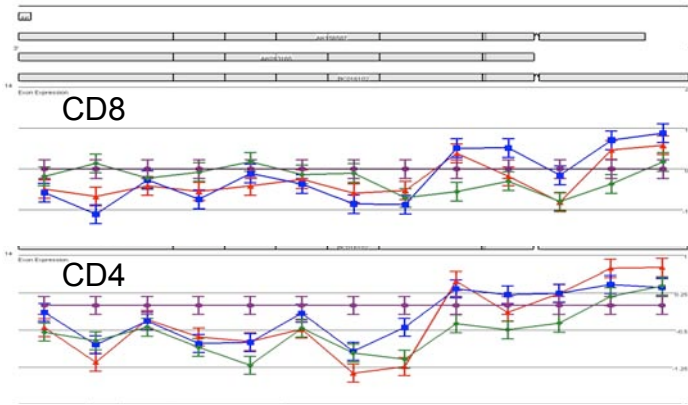

### Polr3f exons and transcripts

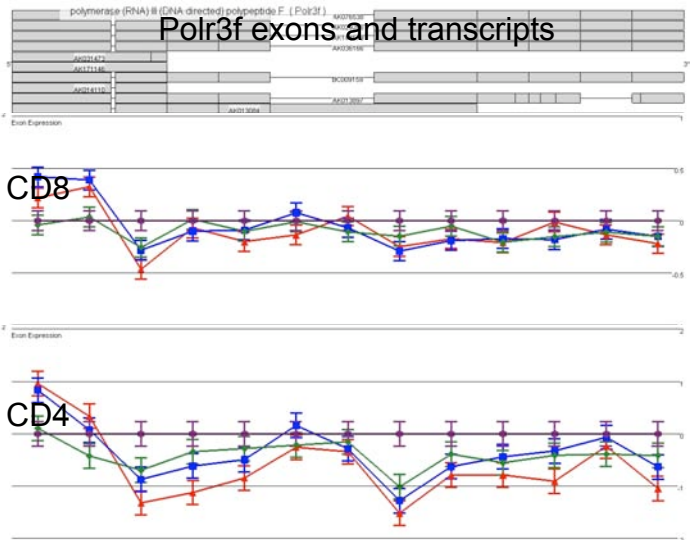

Alternative promoter & 1st exon, initiates at internal Met & lack PH domain

### Pipcg1

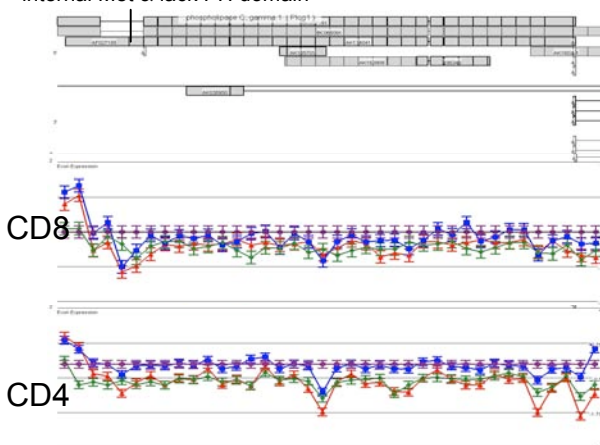

### Ppp3ca exons and transcripts

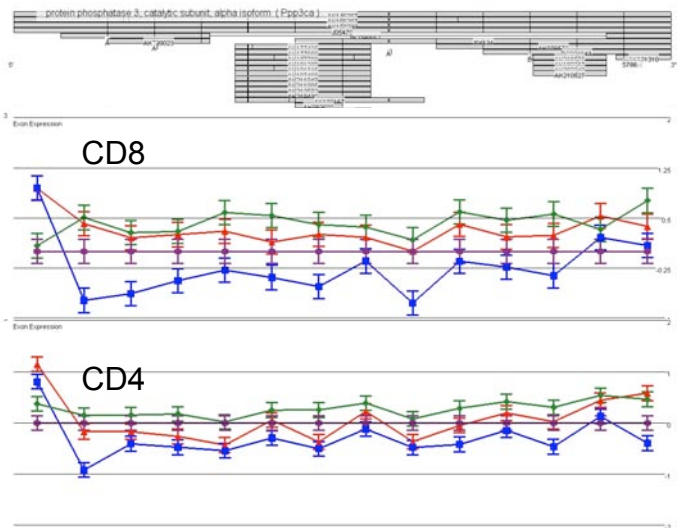



### Pycr1 exons and transcripts

pyroline-5-carboxylate reductase-like (Pycr1)

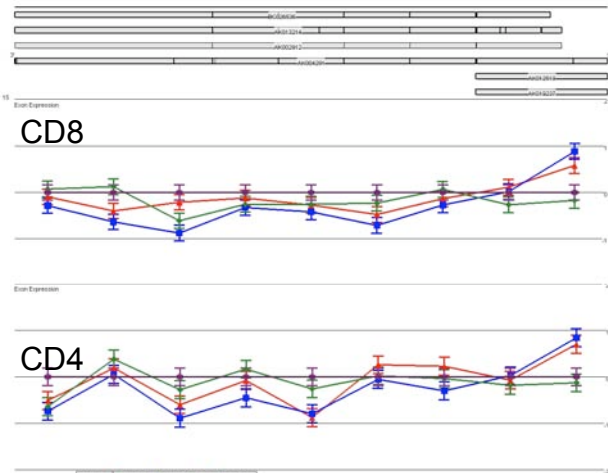

### Rab34 exons and transcripts

RAB34, member of RAS oncogene family (Rab34)

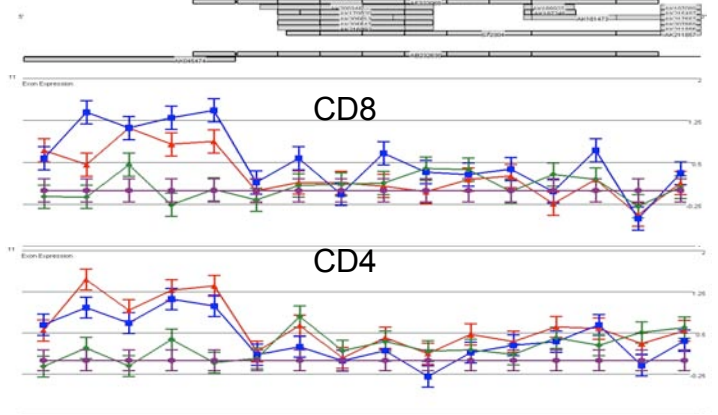

### Rapgef4

Silencing of splice donor - termination & 3'UT

(REF)4 (Rapgef4)

Alternative promoter & 1st exon in intron 4, also in human

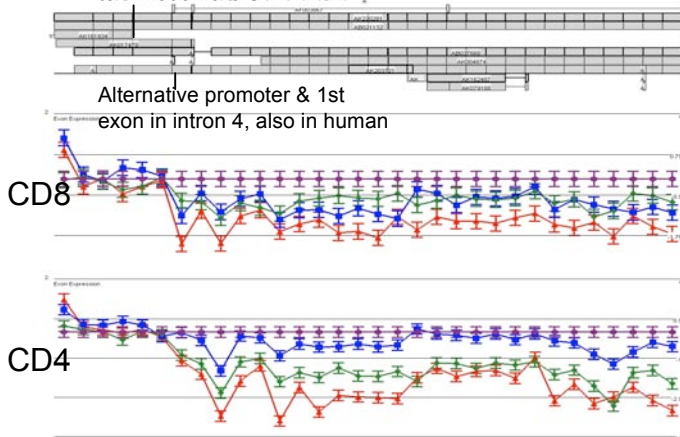

### Raver2 exons and transcripts

ribonucleoprotein, PTB-binding 2 (Raver2)

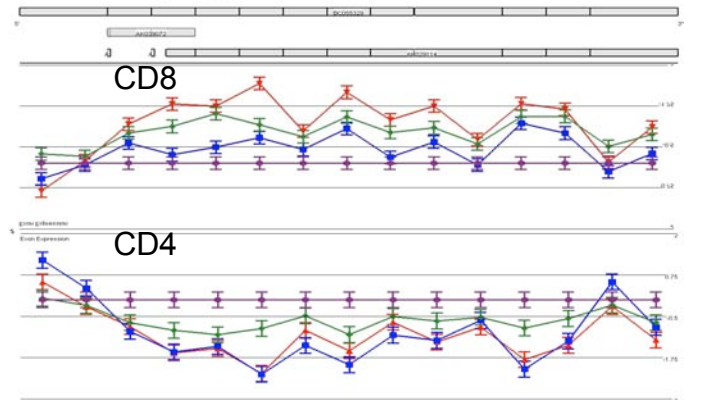

### Rgmb exons and transcripts

RGM domain family member B (Rgmb)

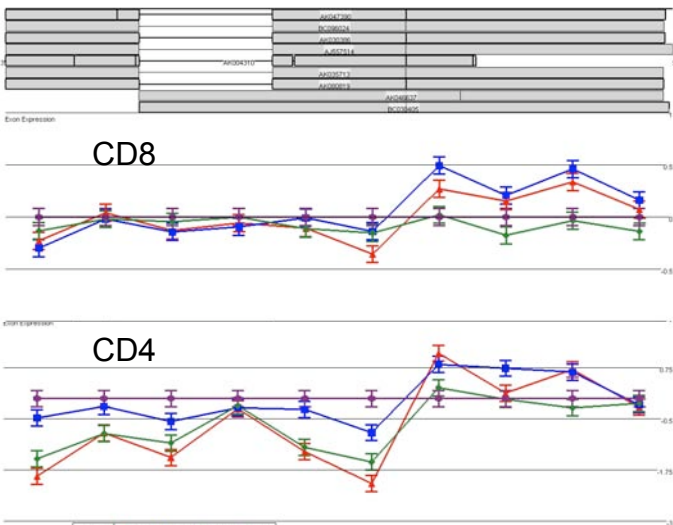

### Rheb1 exons and transcripts

Ras homolog enriched in brain like 1 (Rheb1)

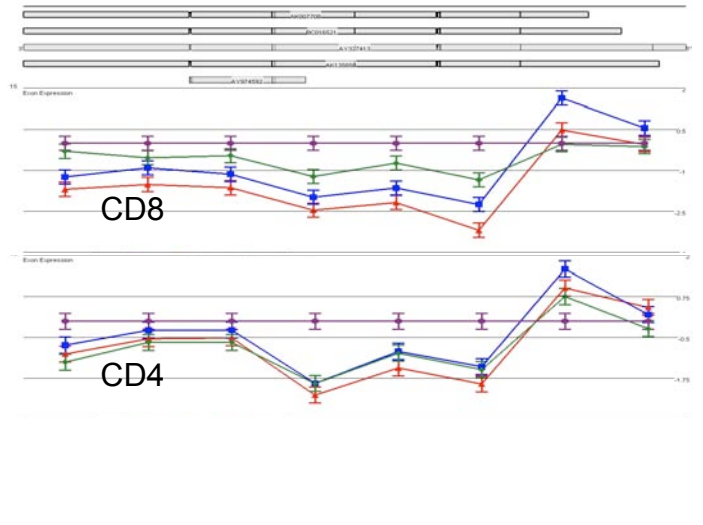

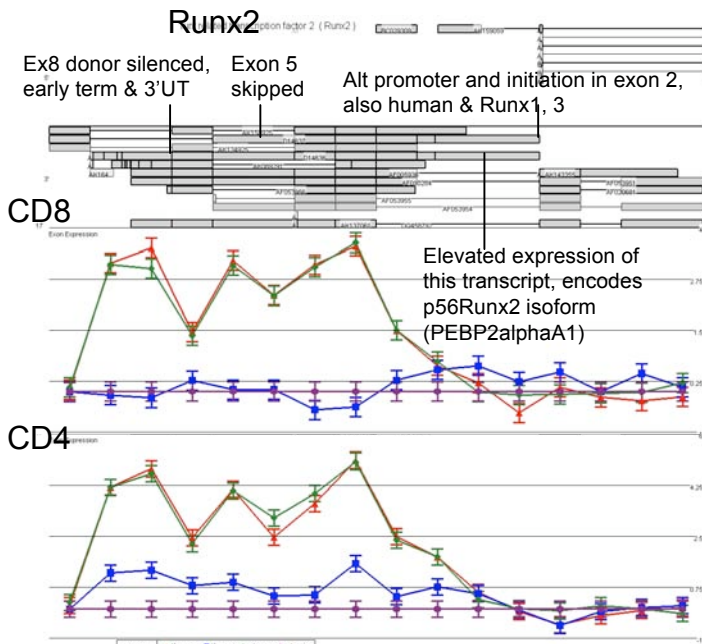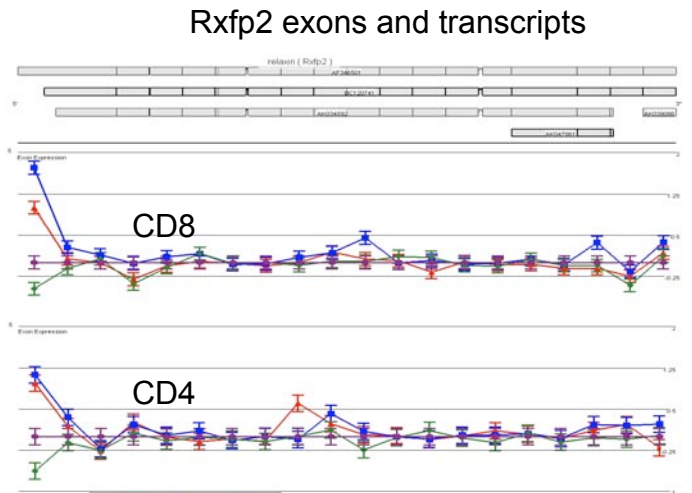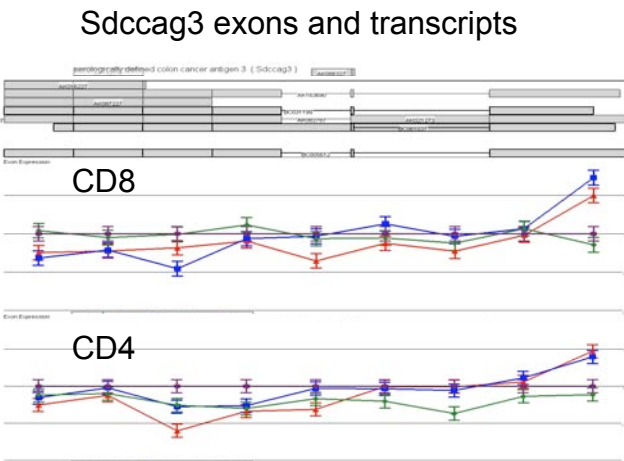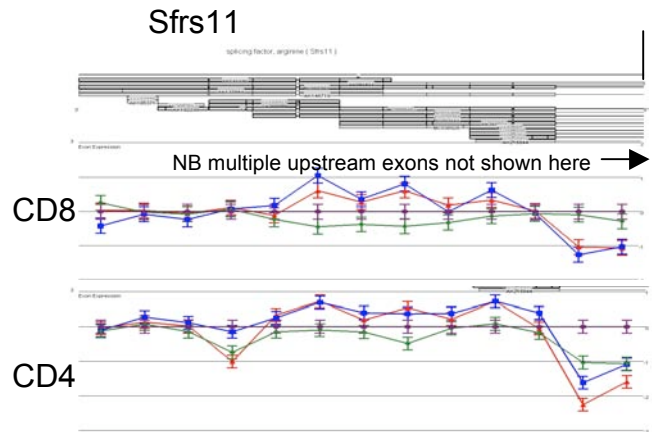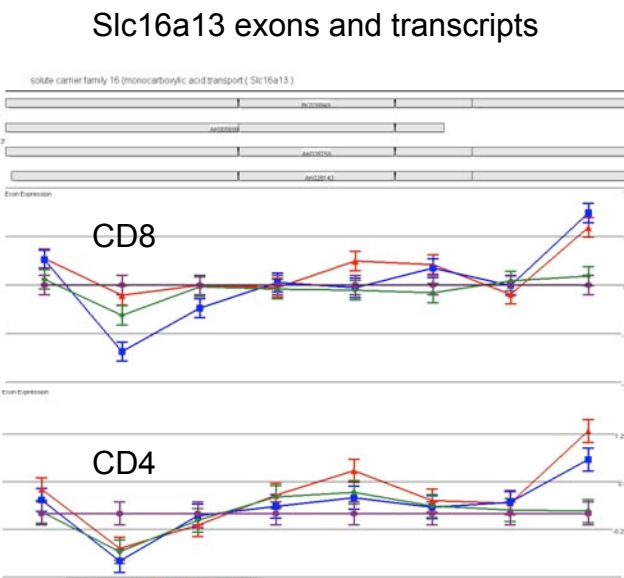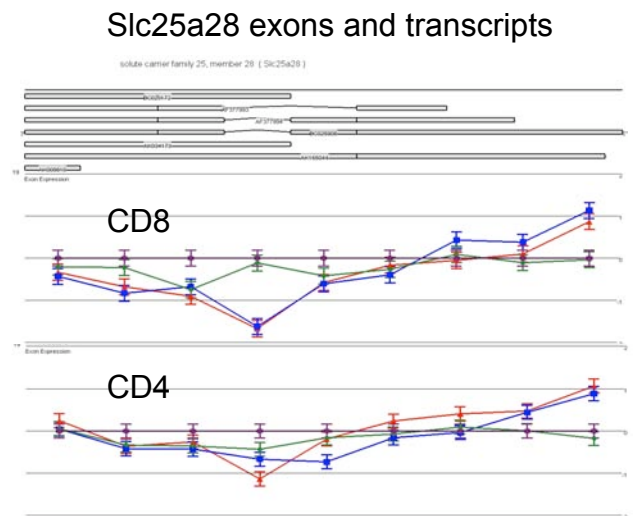

Spaca1 exons and transcripts

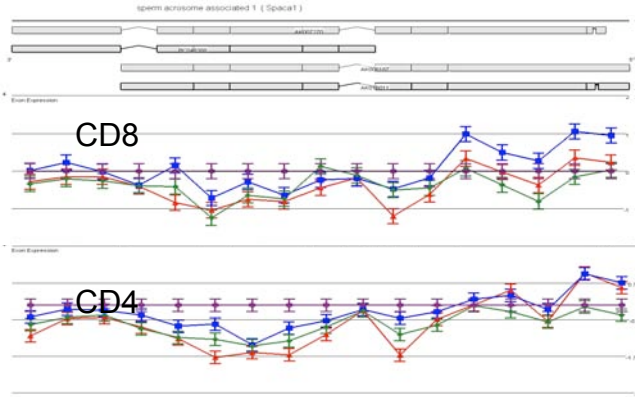

LOC382645 = Tle6  
similar to transducin-like enhancer protein 6 (LOC382645)

Alternative promoter/1st exon,  
multiple transcripts, shortened N-terminus

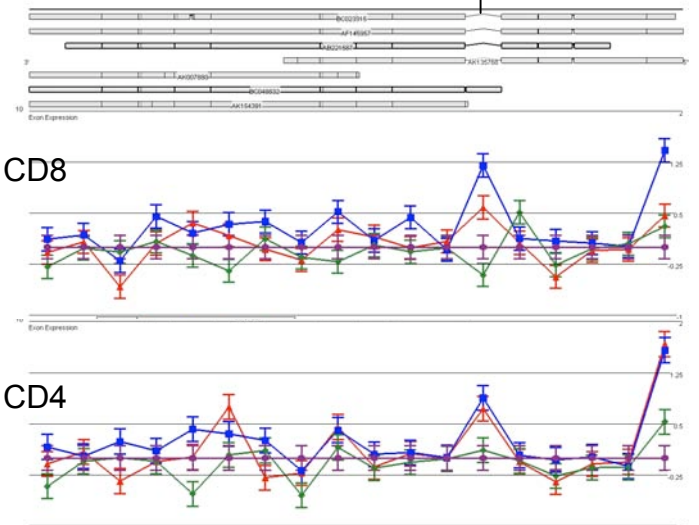

Trpc3 exons and transcripts

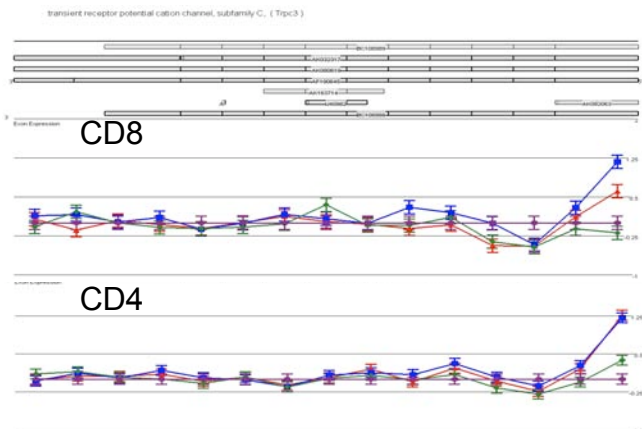

Alternative promoter and  
intronic exon 2 acceptor

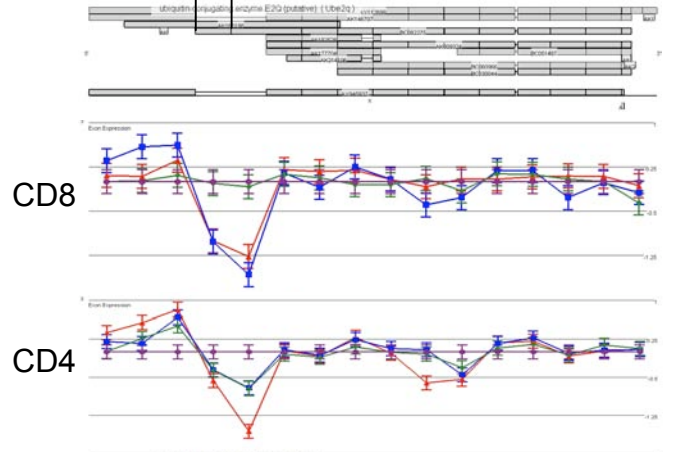

Uck1 exons and transcripts

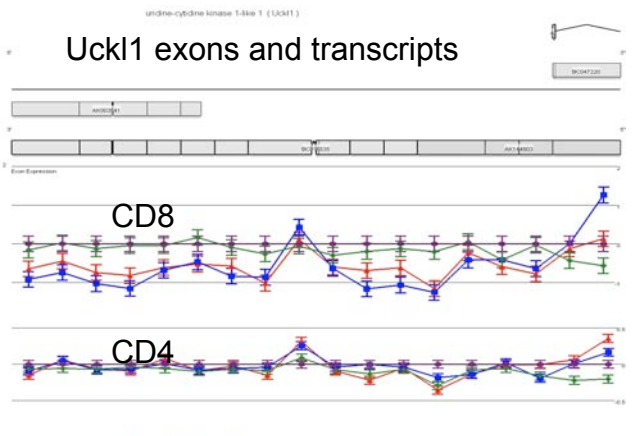

Yeats4 exons and transcripts

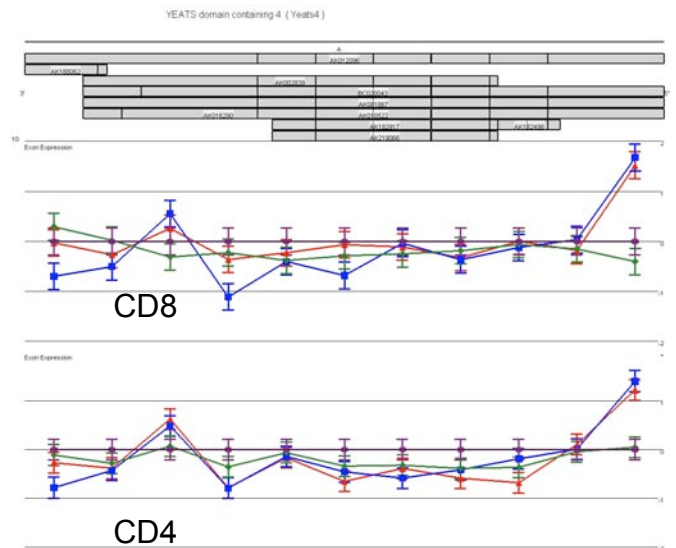

## Group F Gene Views

2810403A07Rik exons and transcripts

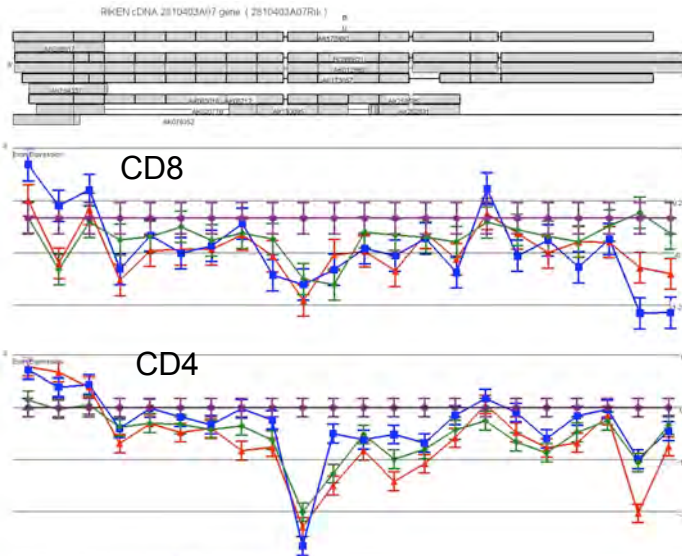

2900005J15 exons and transcripts

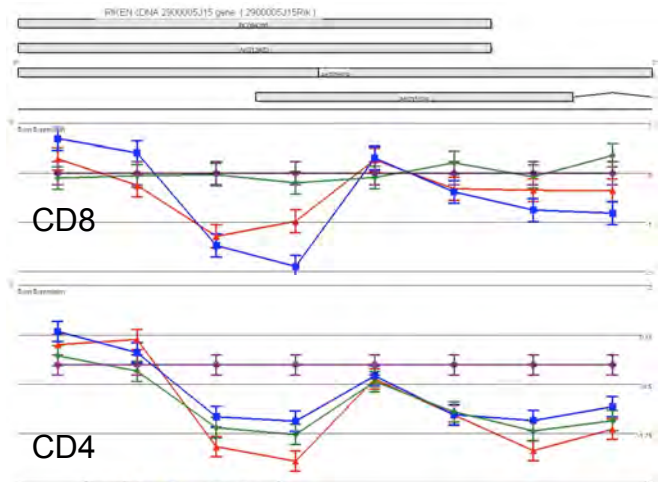

Acot11 exons and transcripts

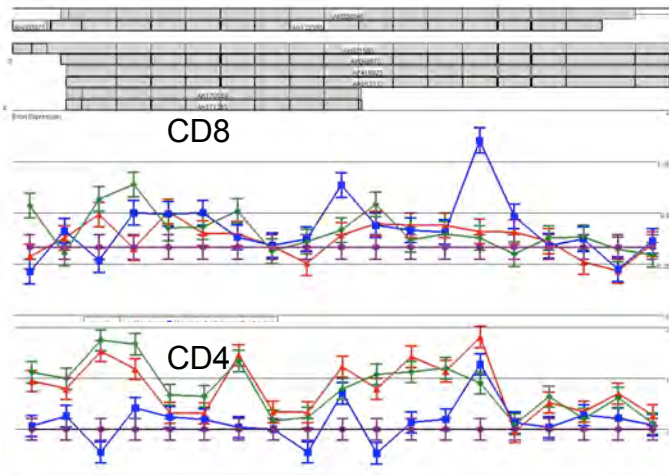

Apba1 exons and transcripts

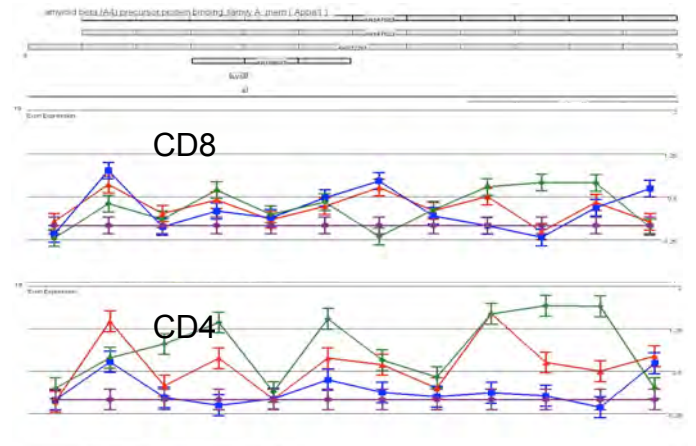

Arid3b exons and transcripts

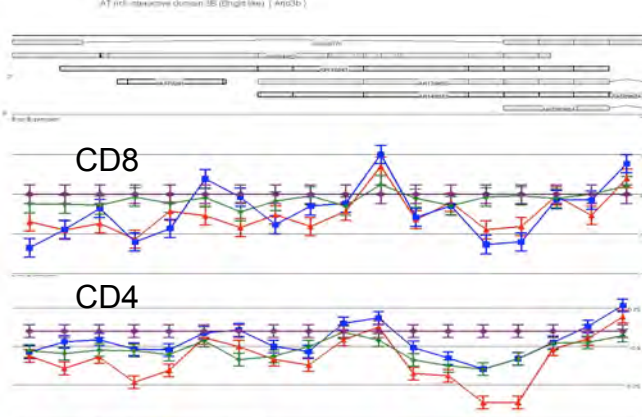

Atg16l1 exons and transcripts

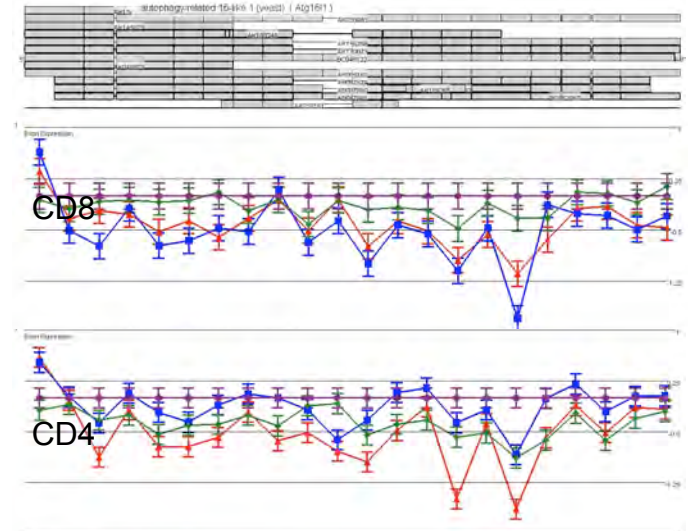

### Atp2b3 exons and transcripts

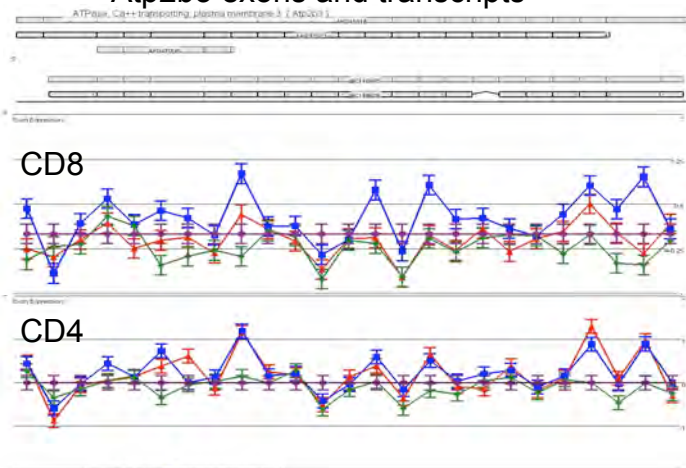

### B230218P12Rik exons and transcripts

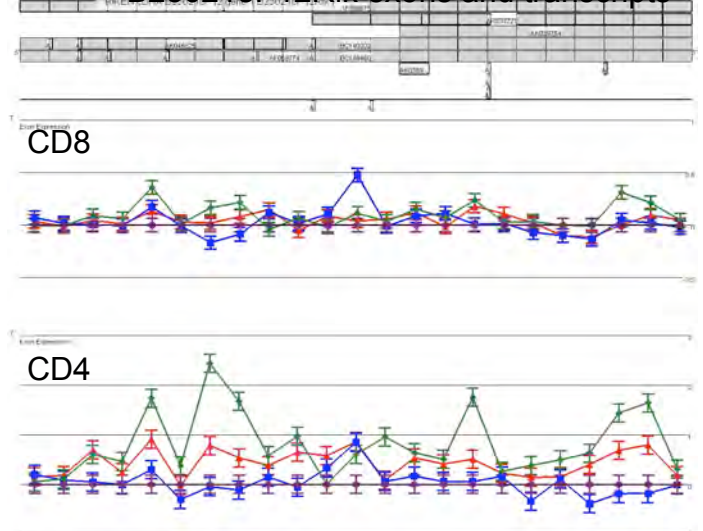

### B4galt4 exons and transcripts

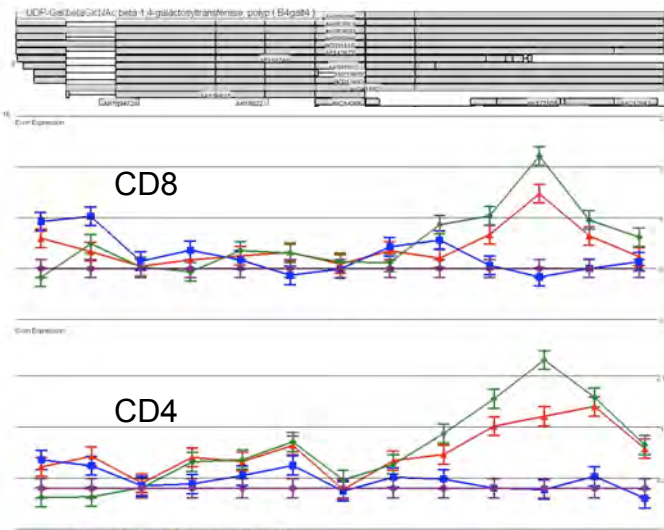

### BC066028 exons and transcripts

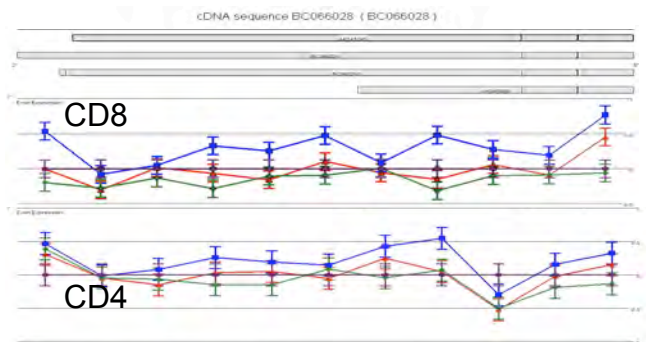

### Ccnb2 exons and transcripts

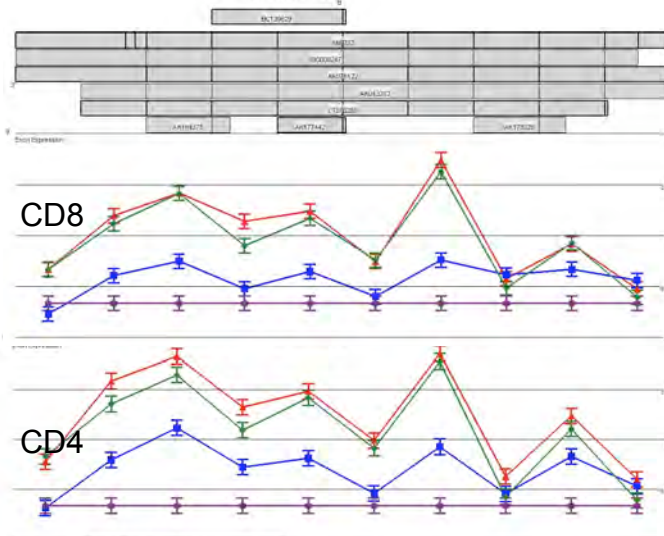

### Cd46 exons and transcripts

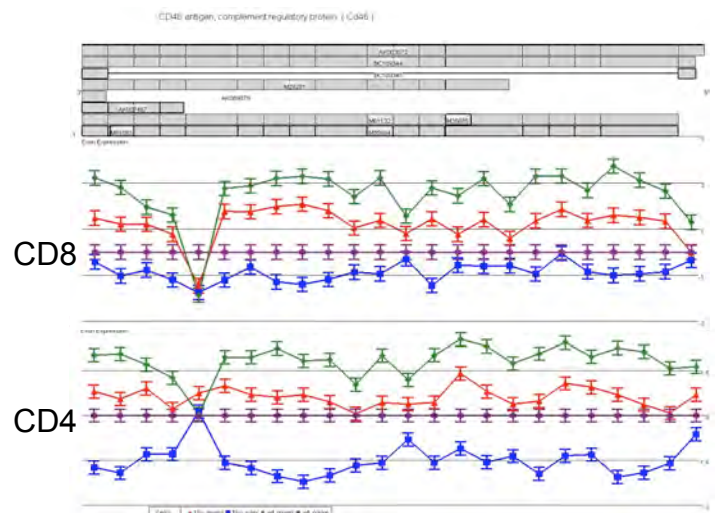

### Cd200r2 exons and transcripts

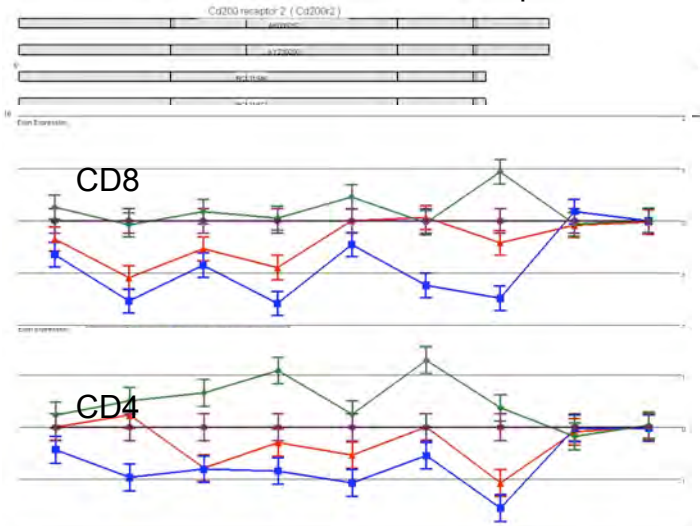

### Cdc45l exons and transcripts

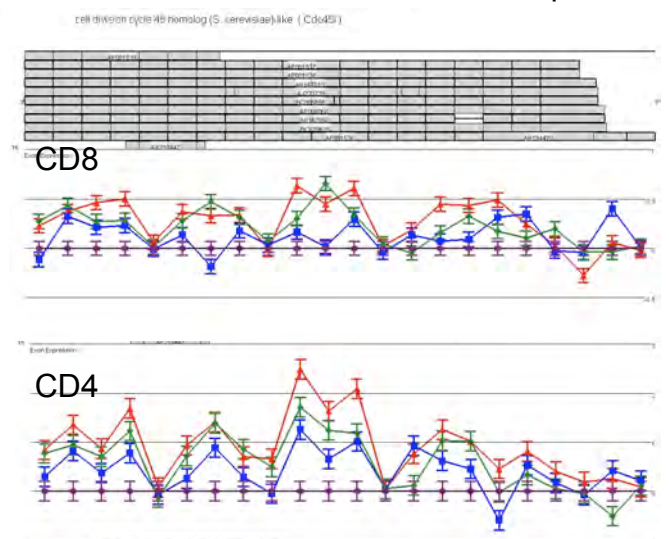

### Cenpk exons and transcripts

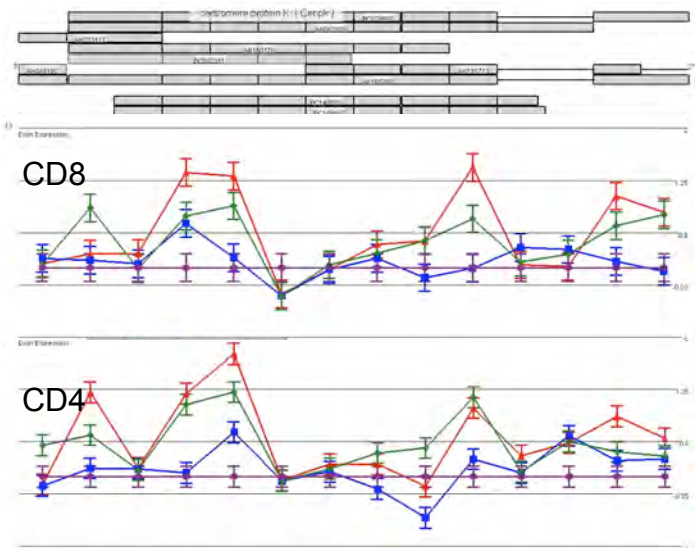

### Chd8 exons and transcripts

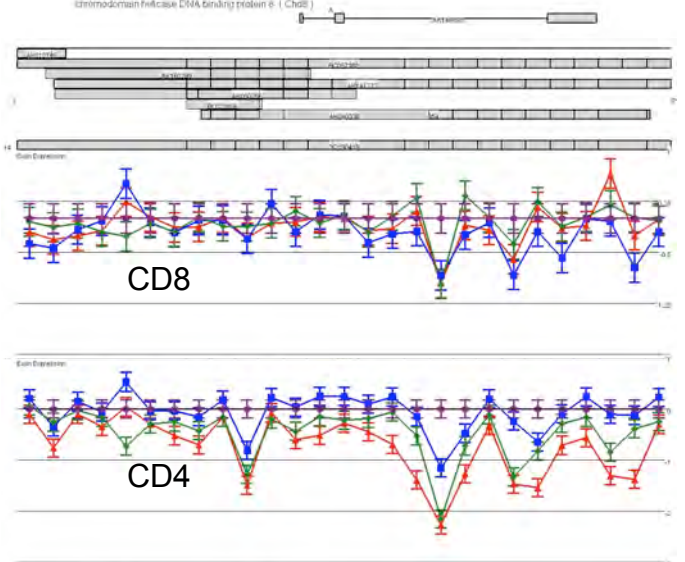

### Cit exons and transcripts

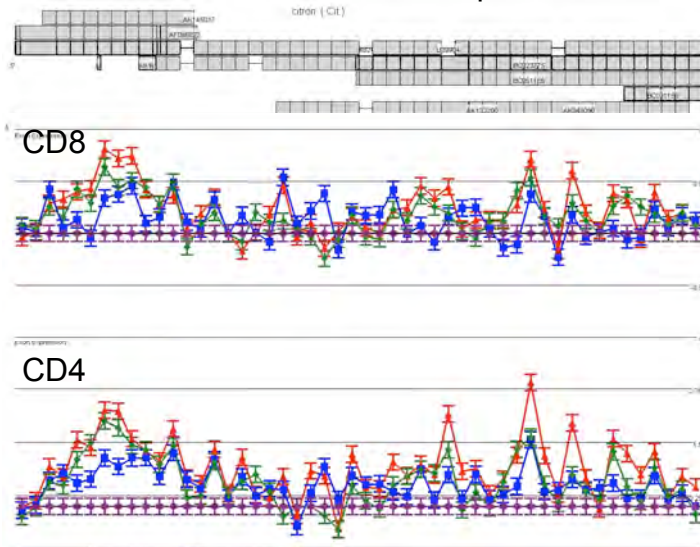

### Clcn6 exons and transcripts

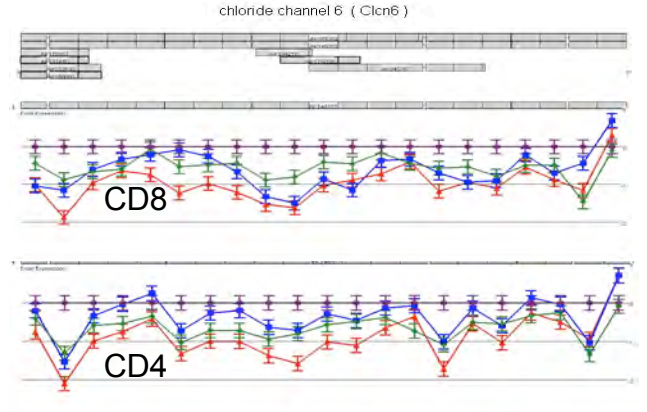

### Clspn exons and transcripts

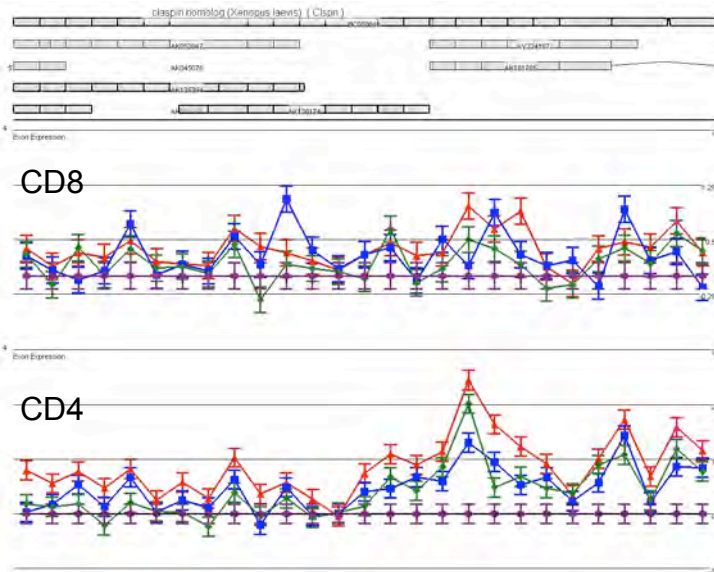

### Col9a2 exons and transcripts

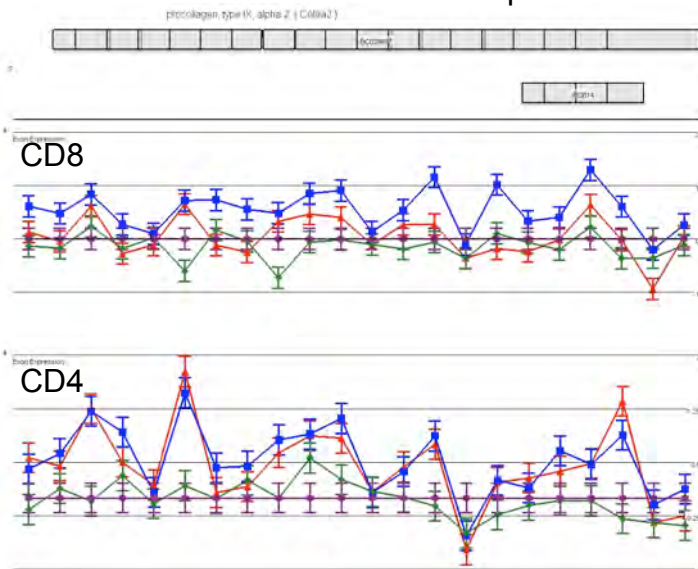

### Cyp2d22 exons and transcripts

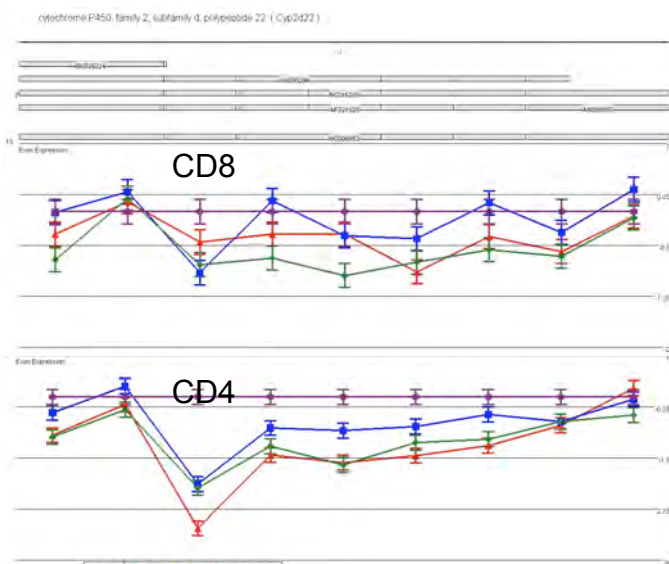

### Col1a1 exons and transcripts

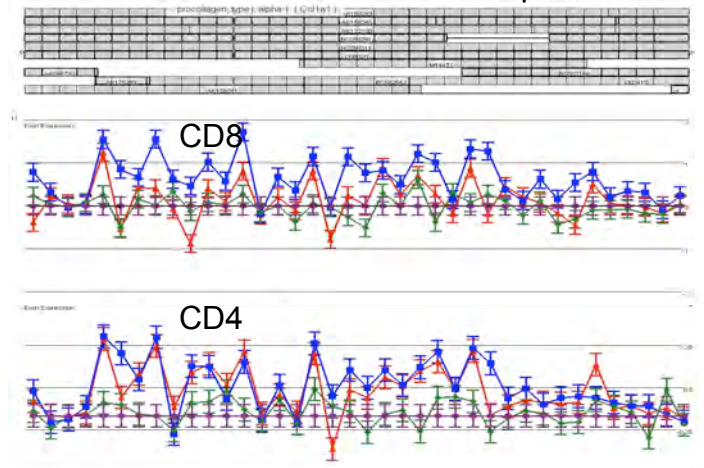

### Col11a2 exons and transcripts

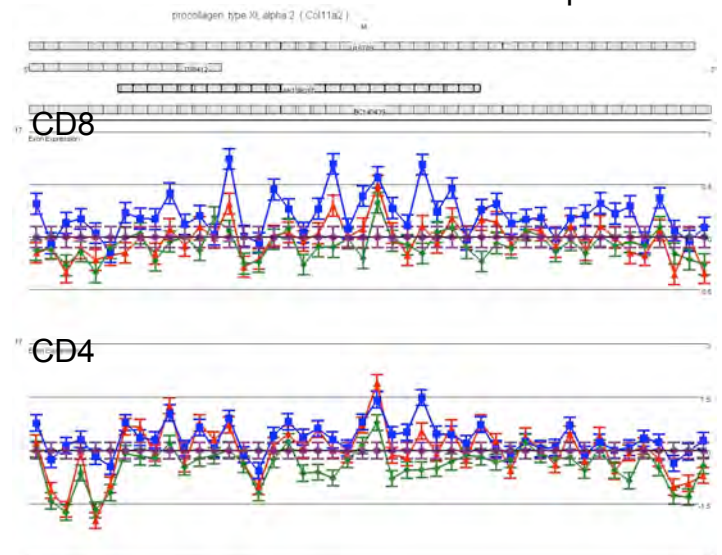

### D1Ertd161e exons and transcripts

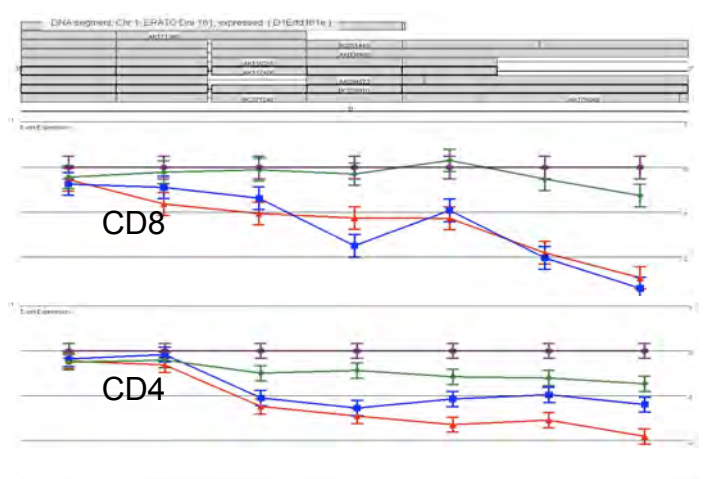

### D4Wsu114e exons and transcripts

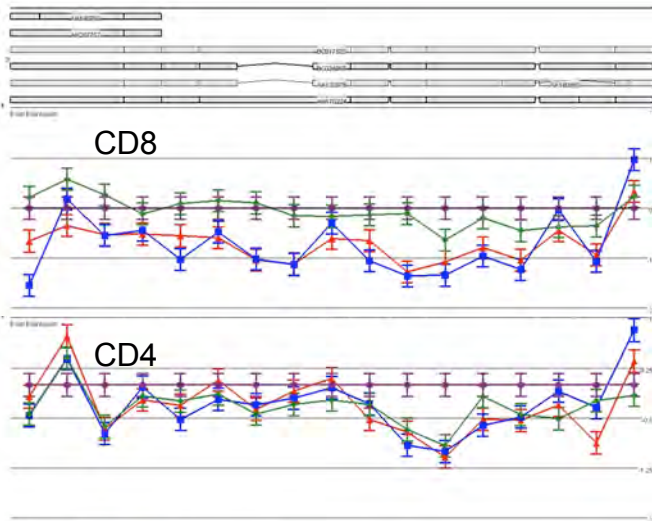

### Dalrd3 exons and transcripts

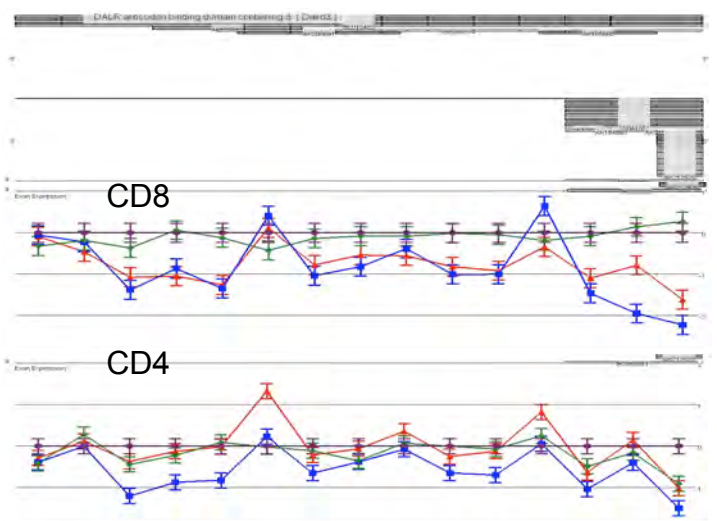

### Diap3 exons and transcripts

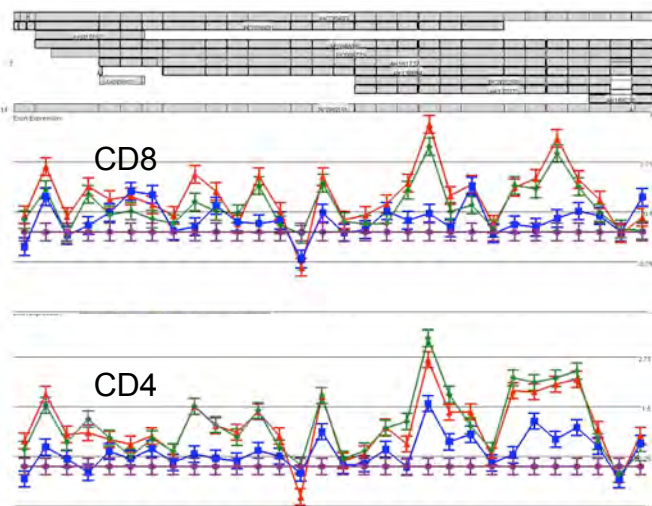

### Dok2 exons and transcripts

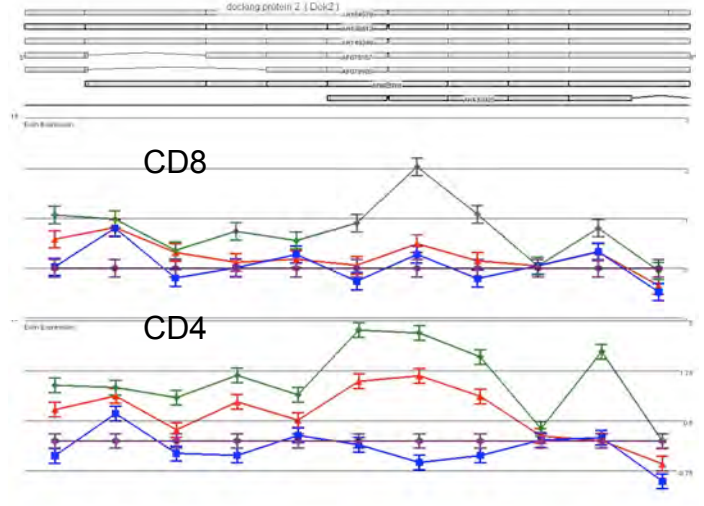

### Dmpk exons and transcripts

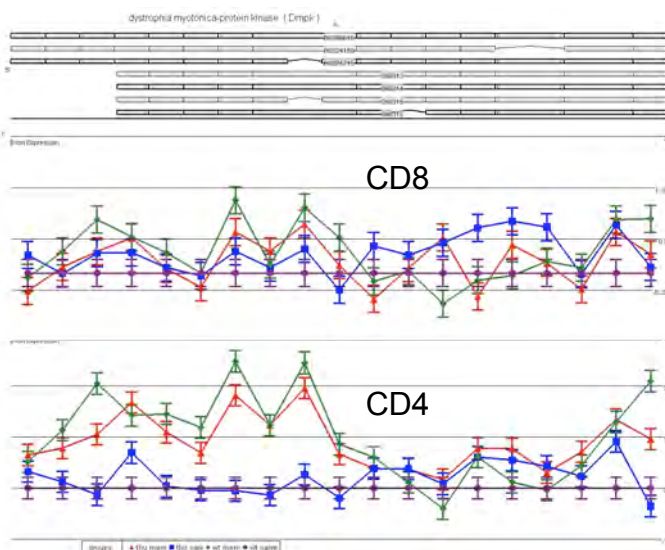

### Dtl exons and transcripts

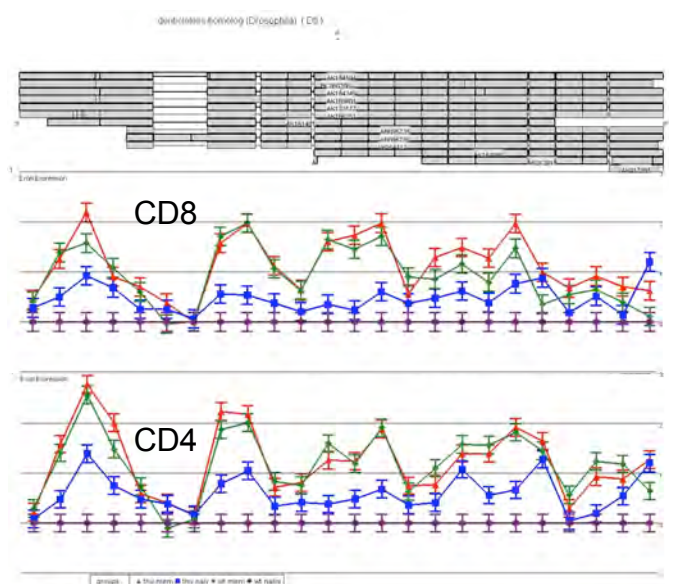



### Dvl1 exons and transcripts

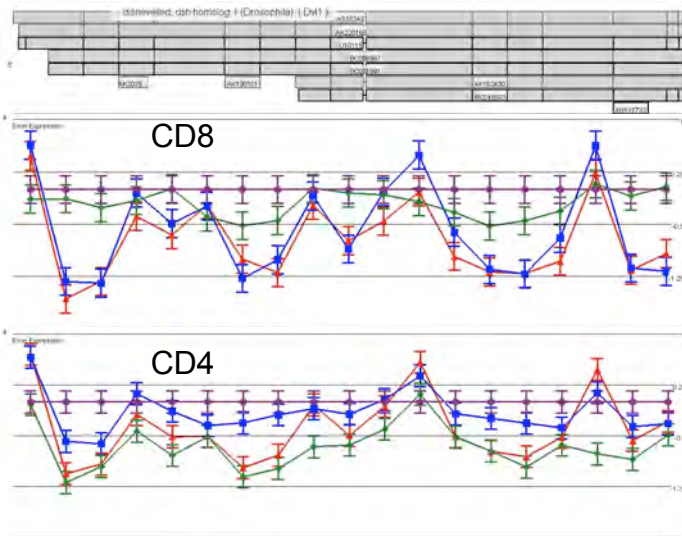

### Esp1 exons and transcripts

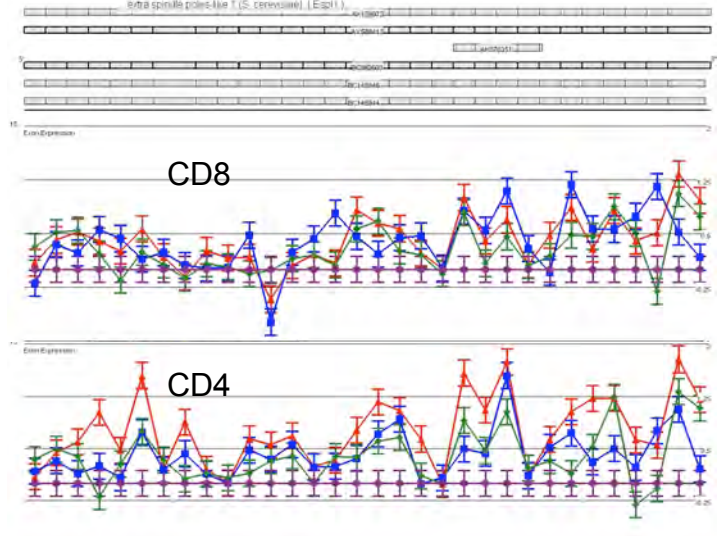

### Eya1 exons and transcripts

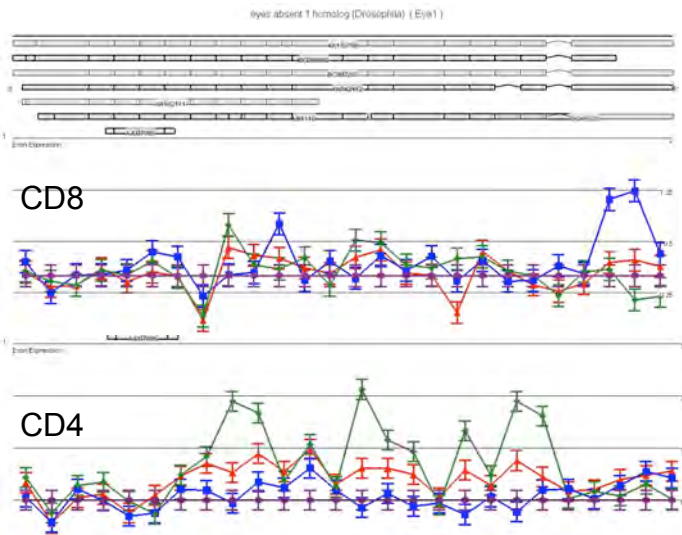

### Fcna exons and transcripts

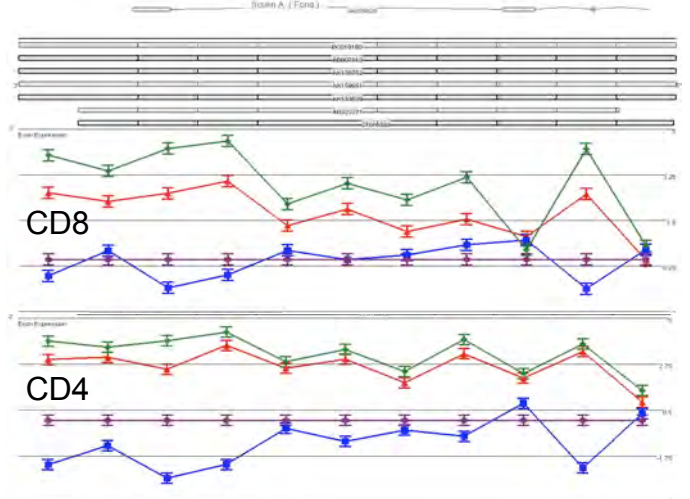

### Gamt exons and transcripts

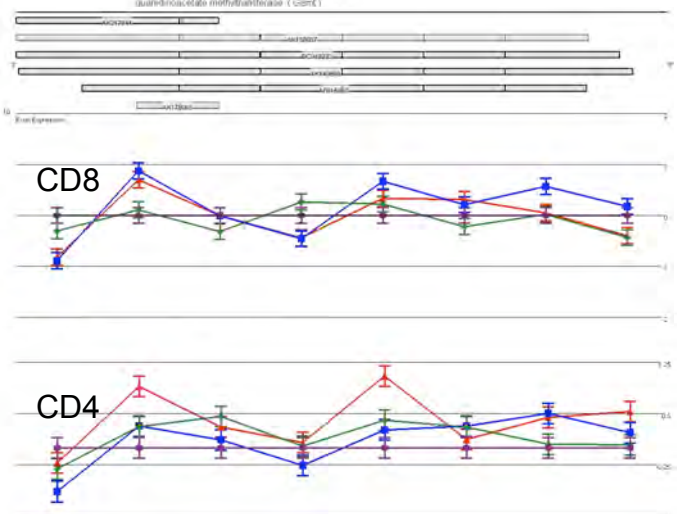

### Glt25d1 exons and transcripts

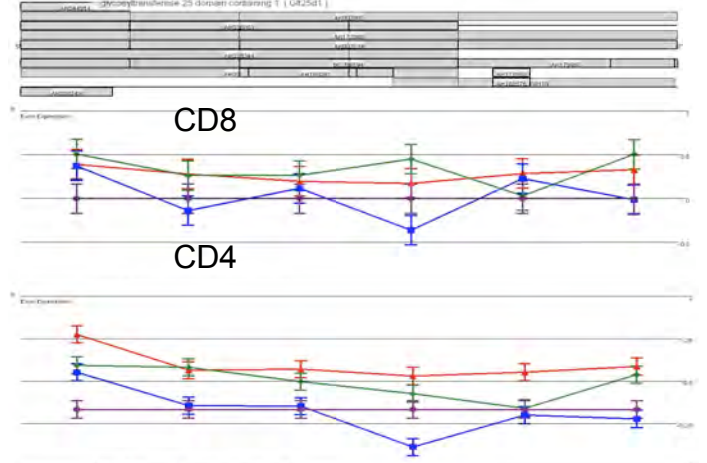

### Gna1 exons and transcripts

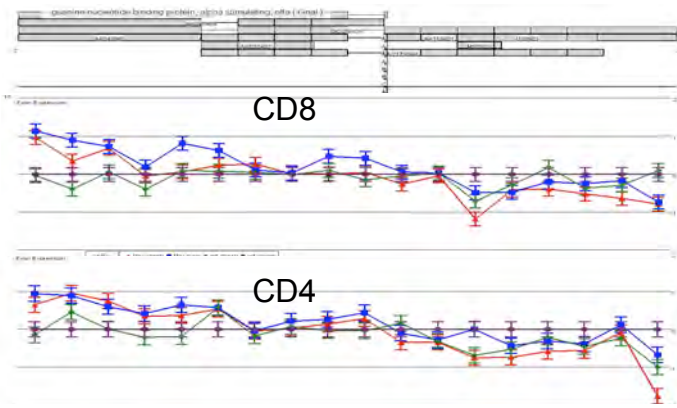

### Gramd1a exons and transcripts

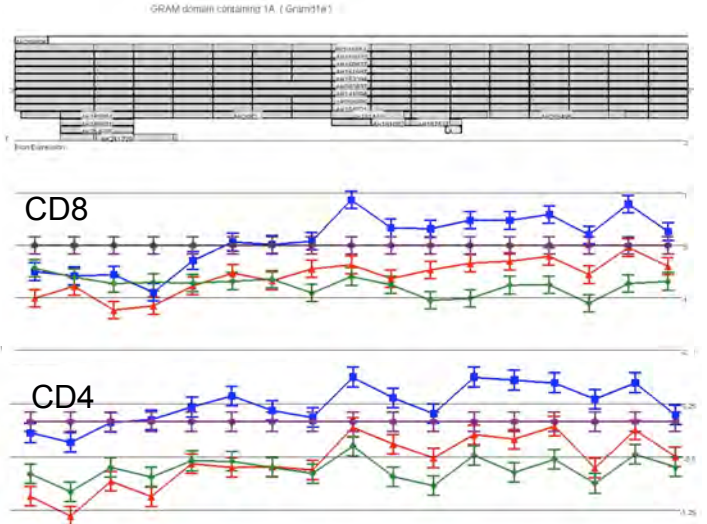

### Hook1 exons and transcripts

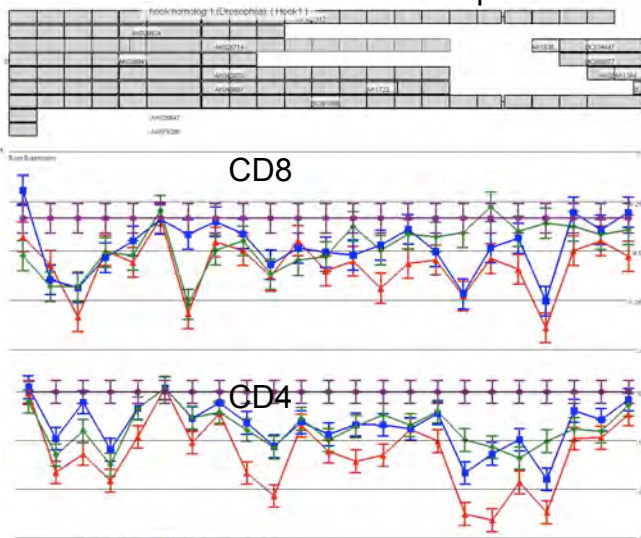

### Hmg3 exons and transcripts

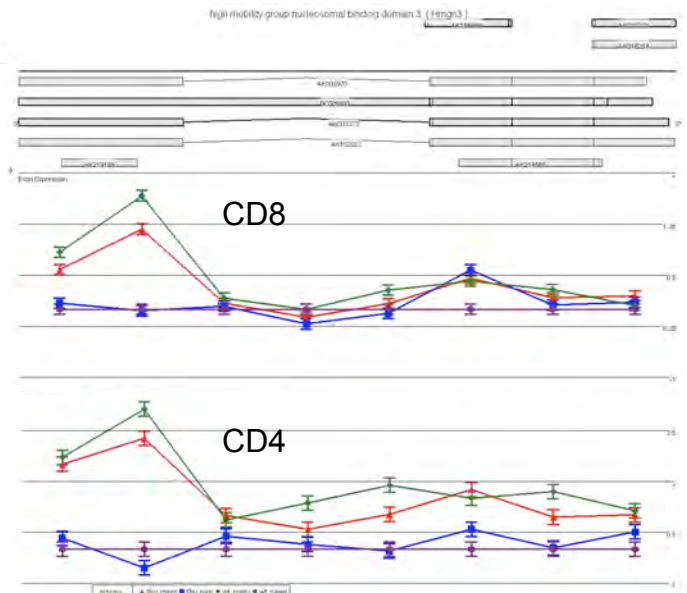

### Itga9 exons and transcripts

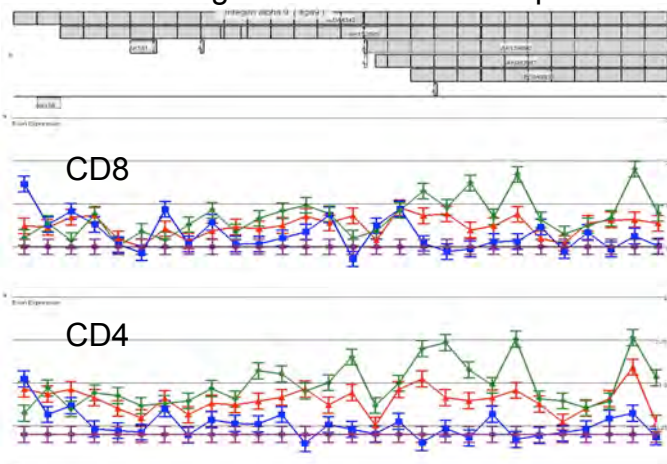

### Kcnh6 exons and transcripts

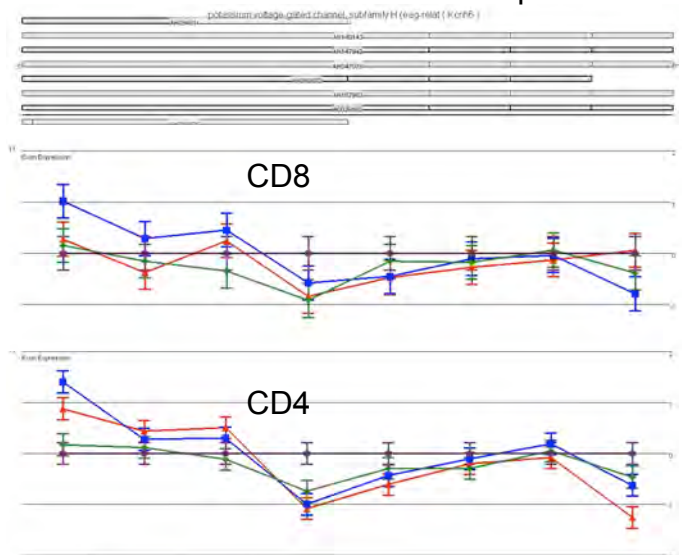

### Kif23 exons and transcripts

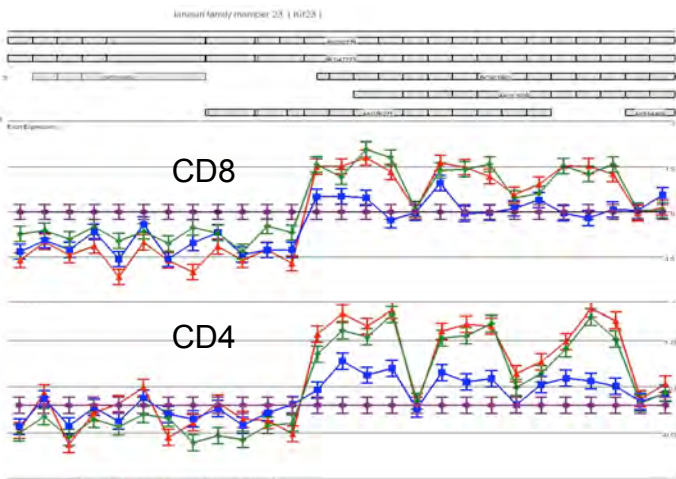

### LOC383613 exons and transcripts

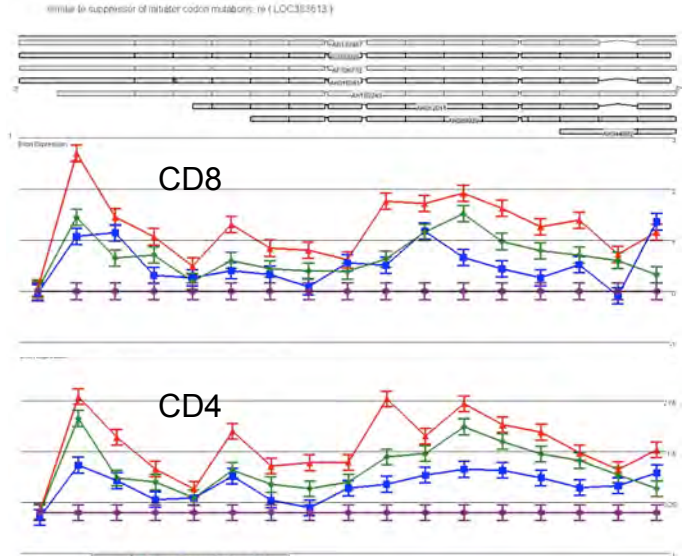

### LOC545194 exons and transcripts

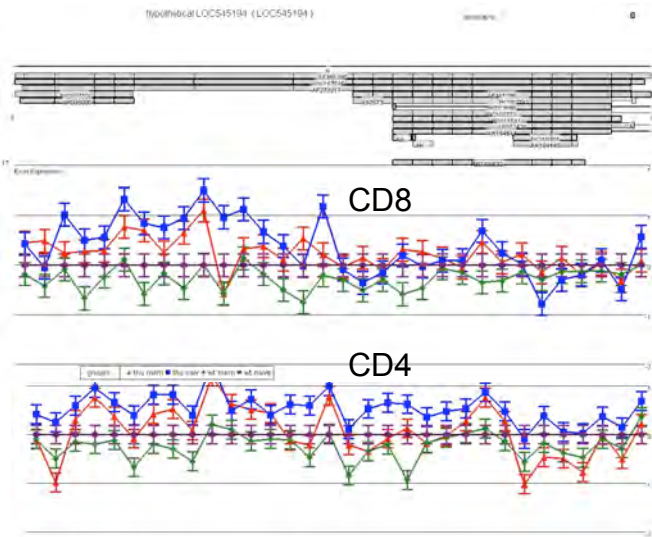

### LOC632908 exons and transcripts

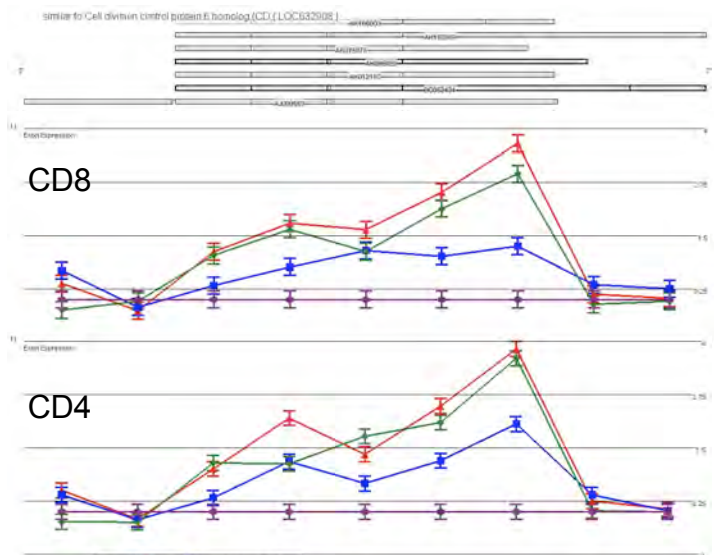

### LOC640058 = Ly49 locus = KlrA cluster

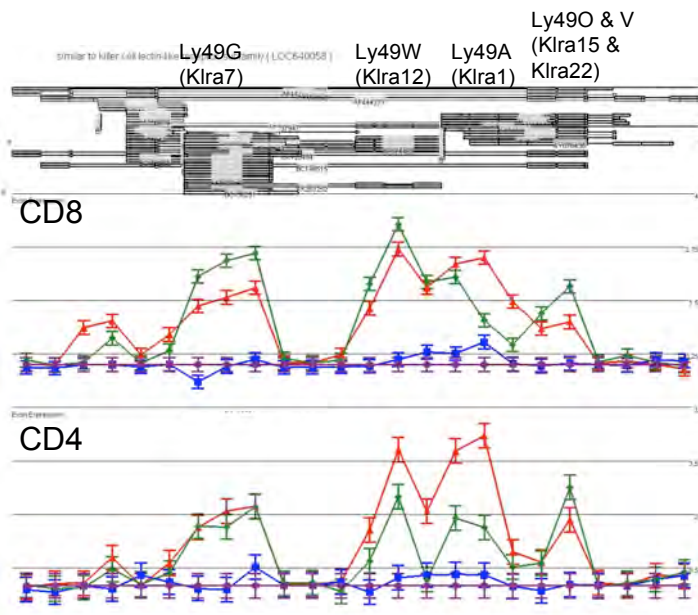

### LOC675982 exons and transcripts

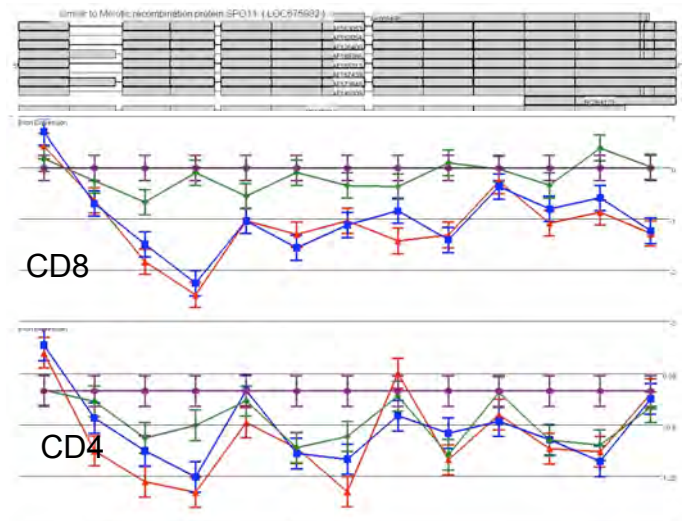

### LOC668110 = 4930481F22Rik

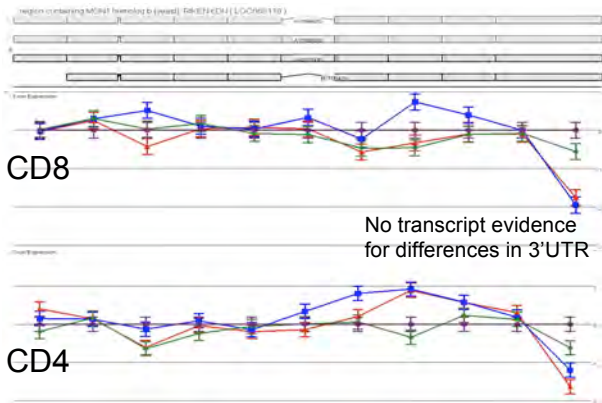

### Map4k5 exons and transcripts

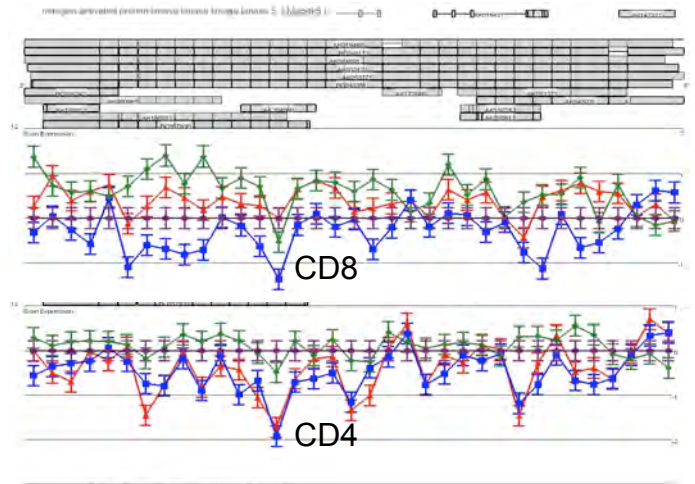

### Mapkapk5 exons and transcripts

MAP kinase-activated protein kinase 5 (Mapkapk5)

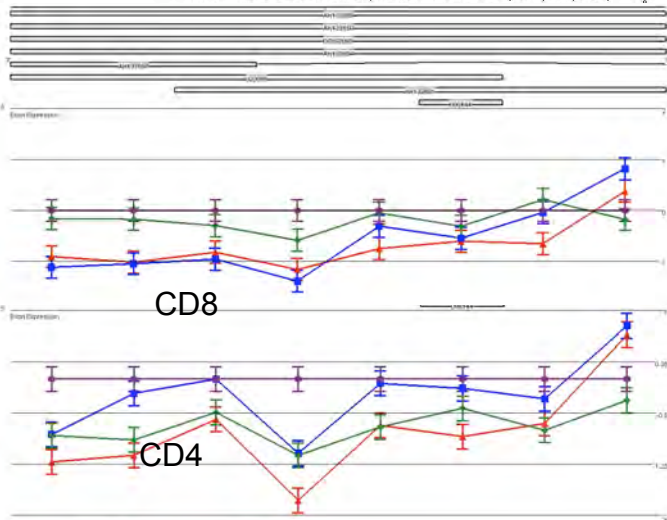

### Mare exons and transcripts

alpha protein regulatory element containing gene (Mare)

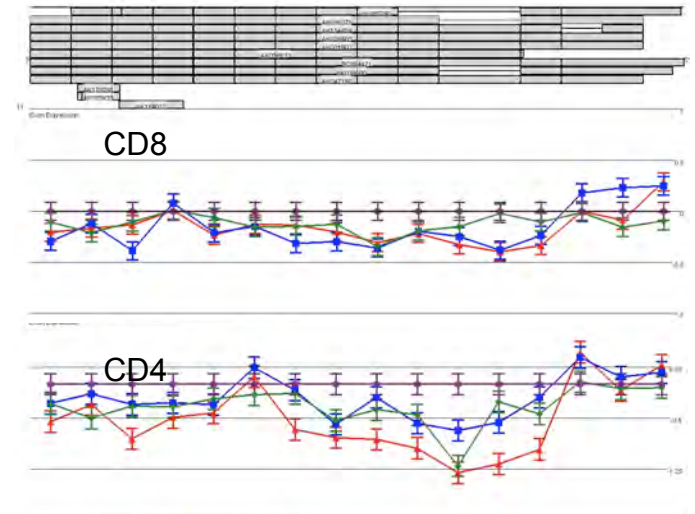

### Mecp2 exons and transcripts

MECP2 C19orf12 protein 1 (Mecp2)

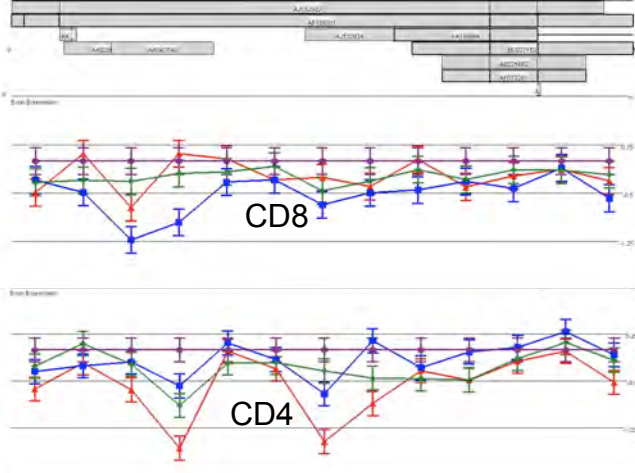

### MGC67181 exons and transcripts

zinc finger-like protein (MGC67181)

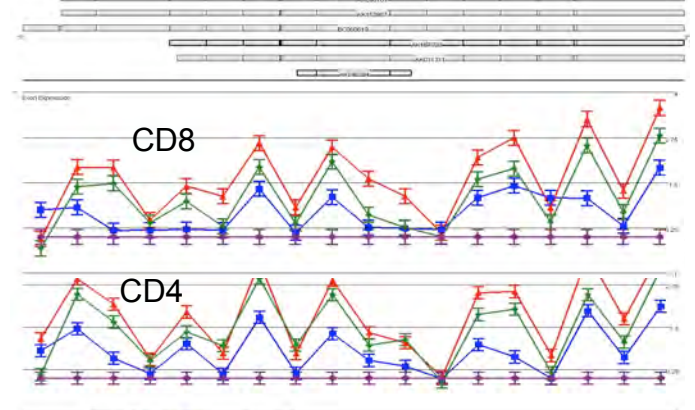

### Mgl1 exons and transcripts

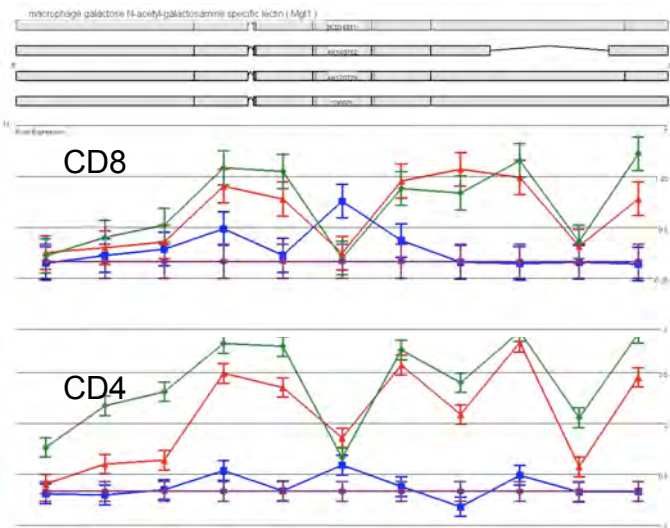

### Mical2 exons and transcripts

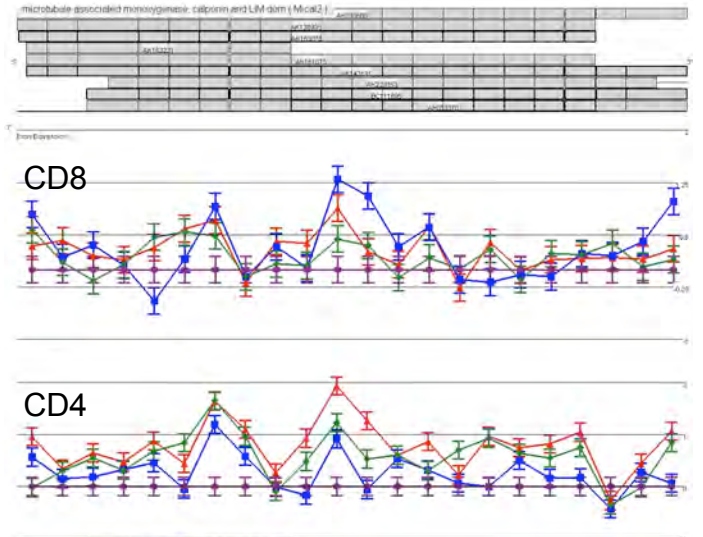

### Myo6

No transcript evidence for alternative stop and 3'UTR

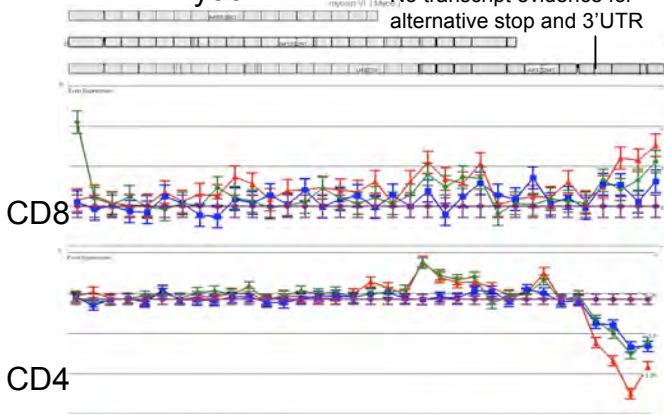

### Npl exons and transcripts

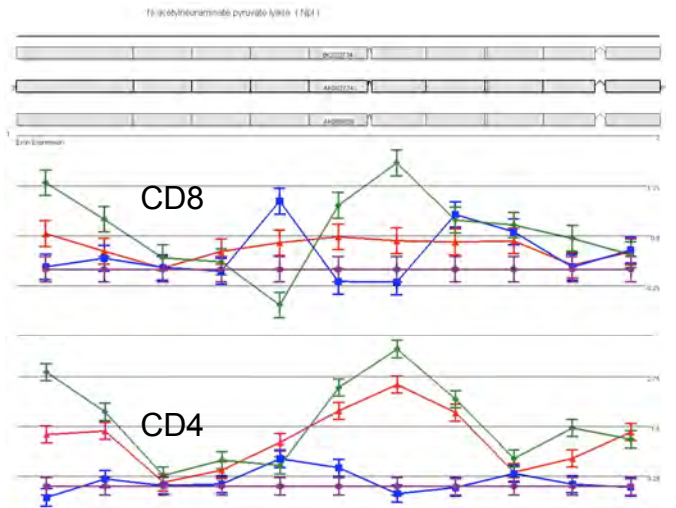

### Ovgp1 exons and transcripts

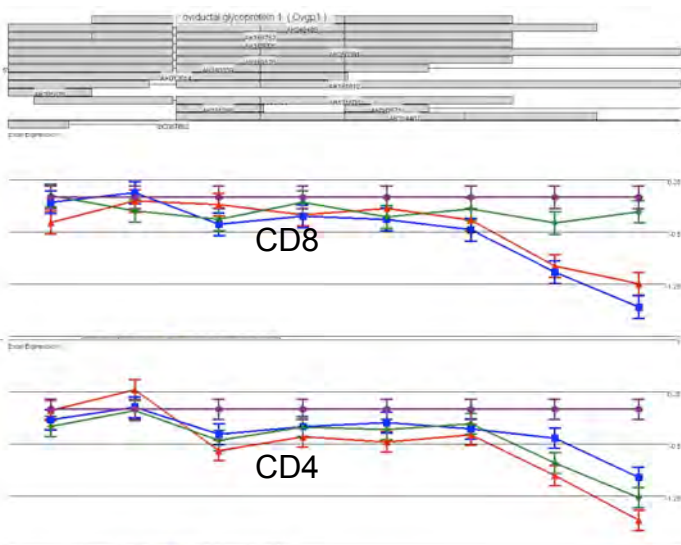

### Pde8a exons and transcripts

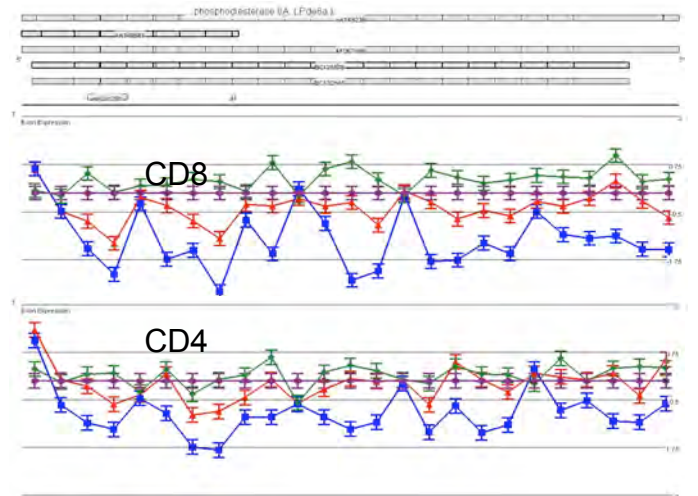

### Prkar1b exons and transcripts

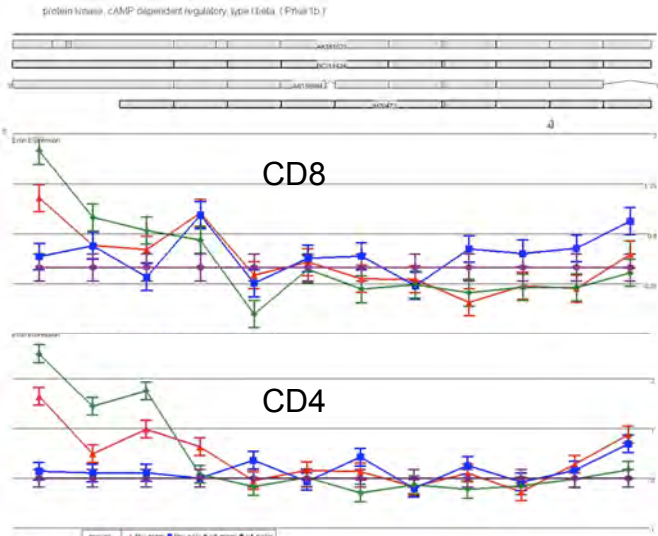

### Ptp1b exons and transcripts

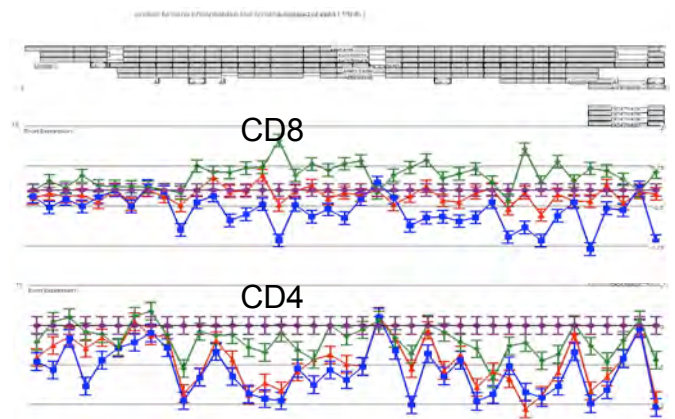

### Ptpm1 exons and transcripts

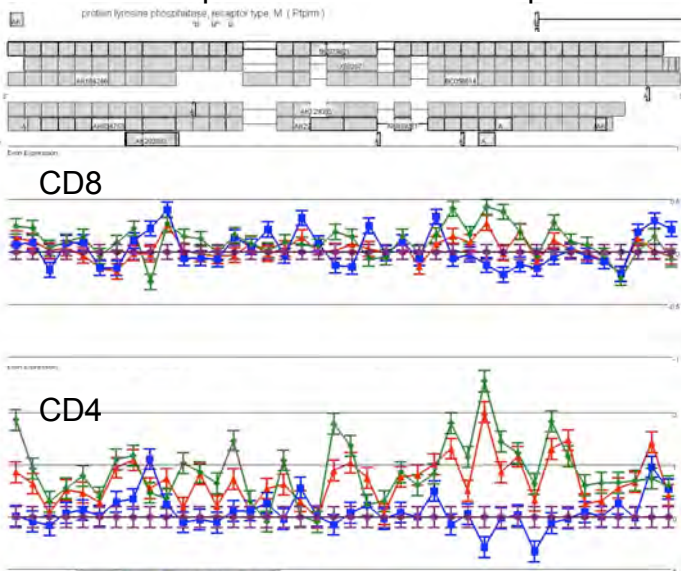

### Pold1 exons and transcripts

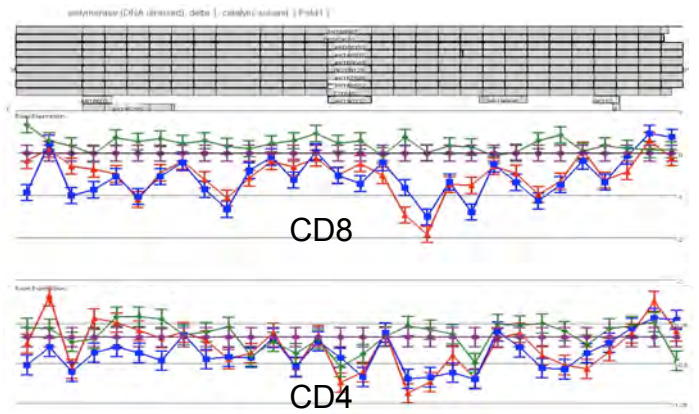

### Rad17 exons and transcripts

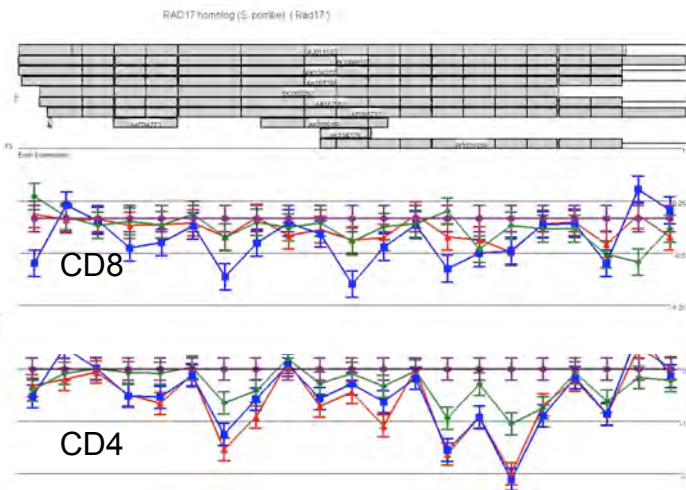

### Sftpb exons and transcripts

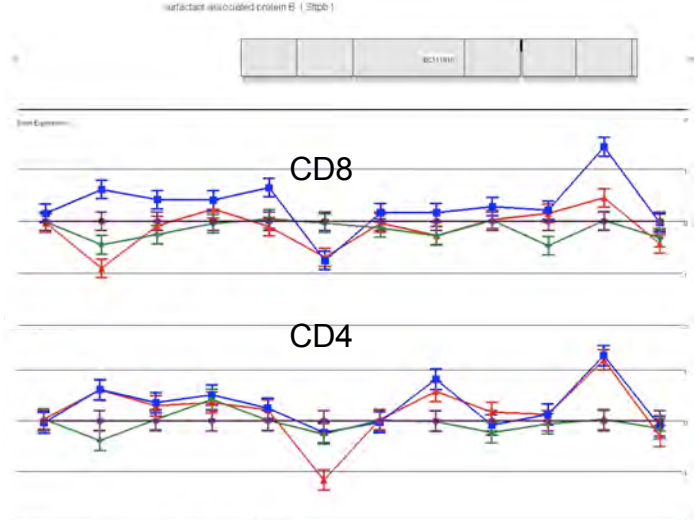

### Rgl1 exons and transcripts

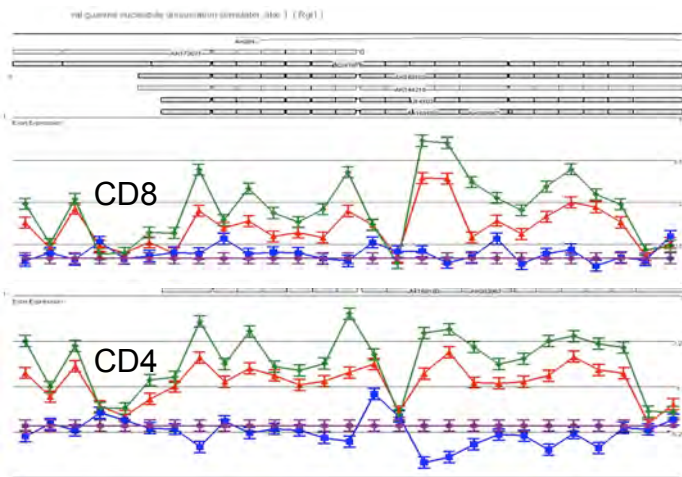

### Slc37a2 exons and transcripts

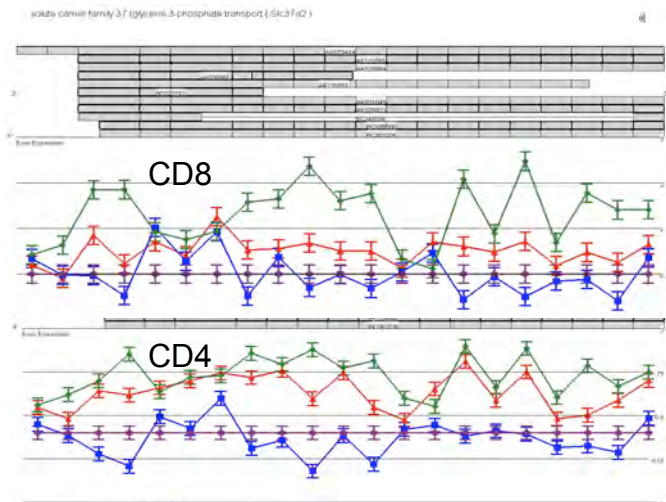

### Tmprss13 exons and transcripts

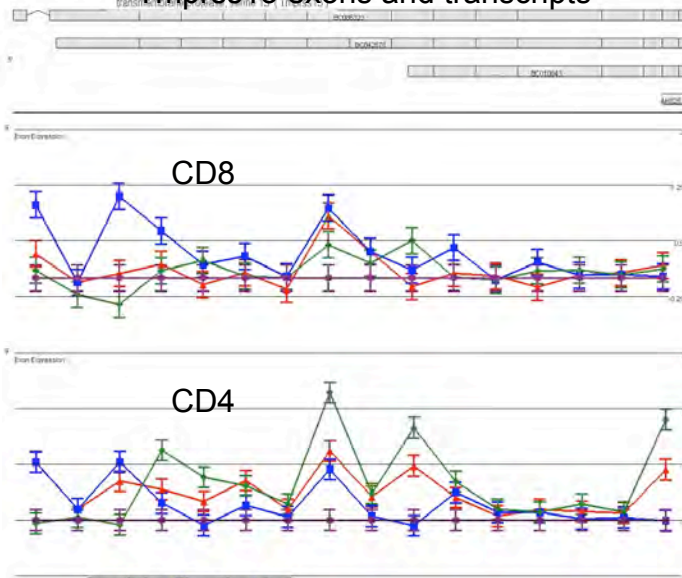

### Rbpms exons and transcripts

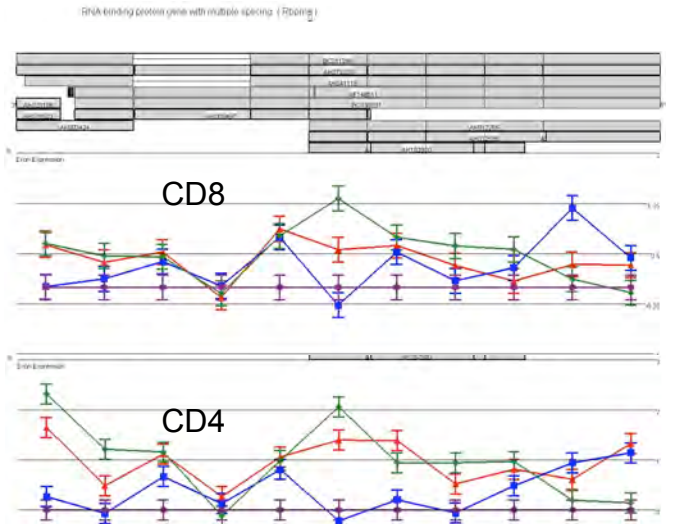

No transcript evidence for alternative start or stop, however few ESTs and transcripts in dbase

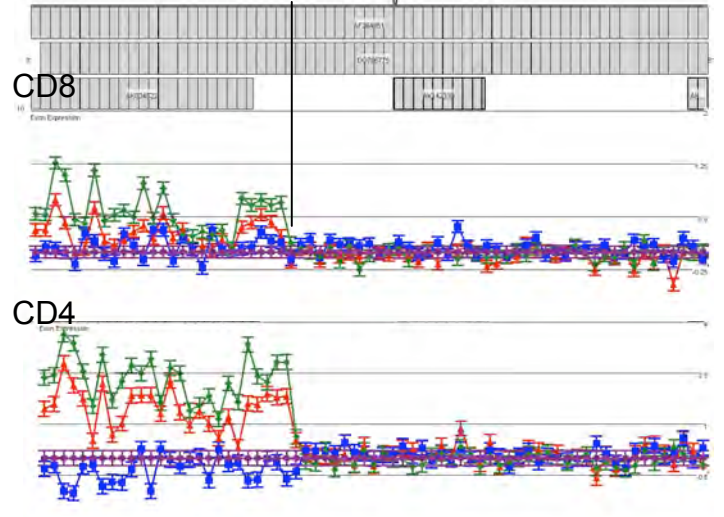

### Ttc28 exons and transcripts

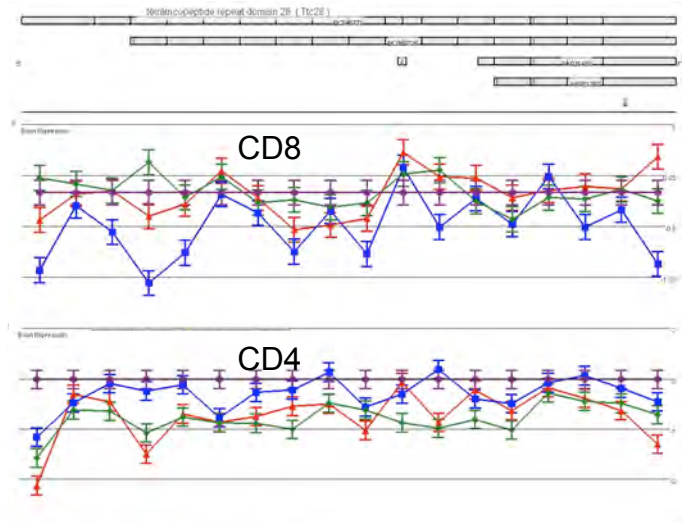

### Utrn exons and transcripts

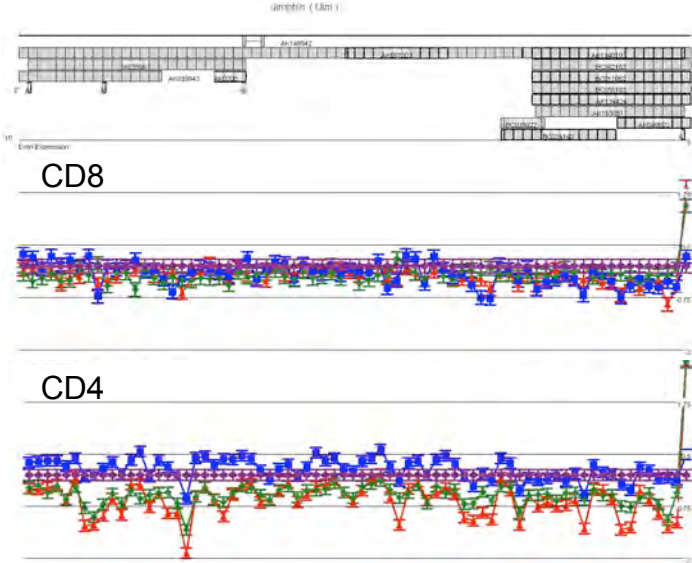

### Wdr77

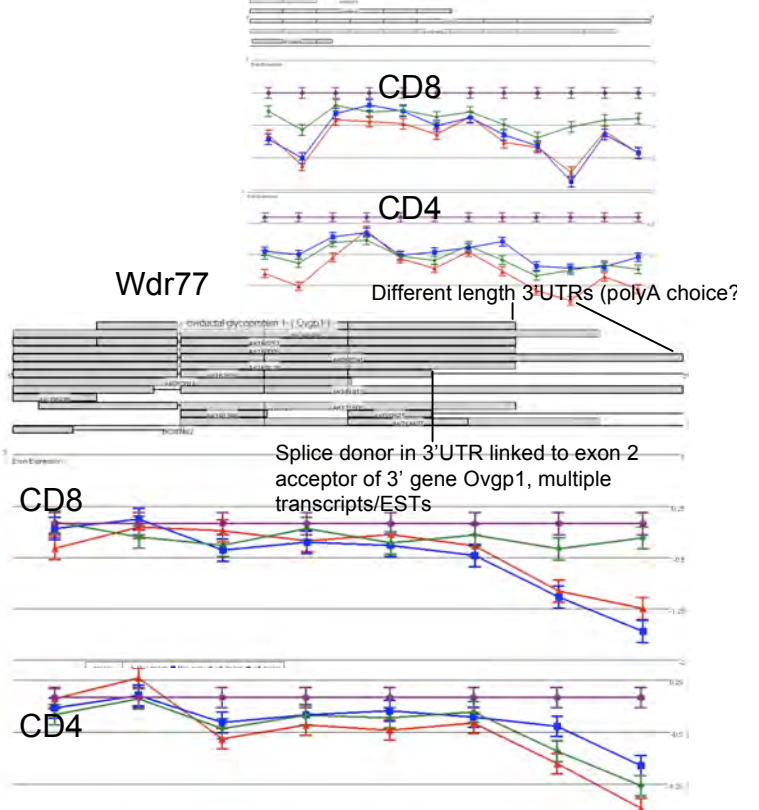

### Whsc11 exons and transcripts

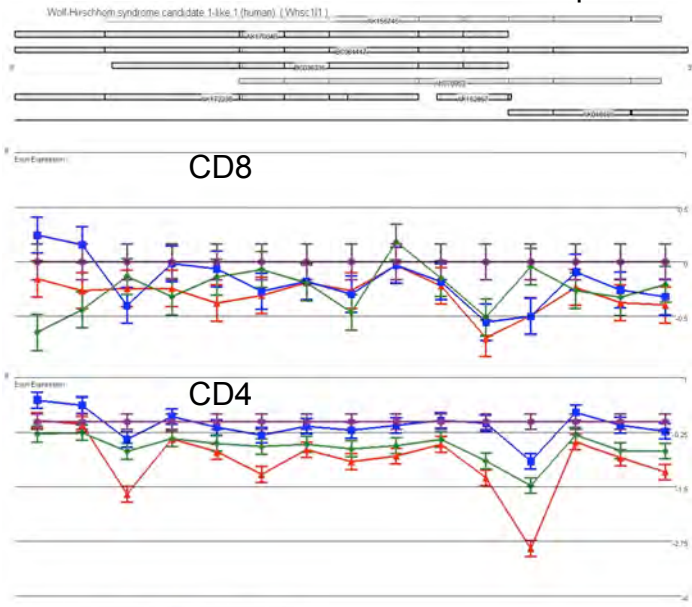

### Zan exons and transcripts

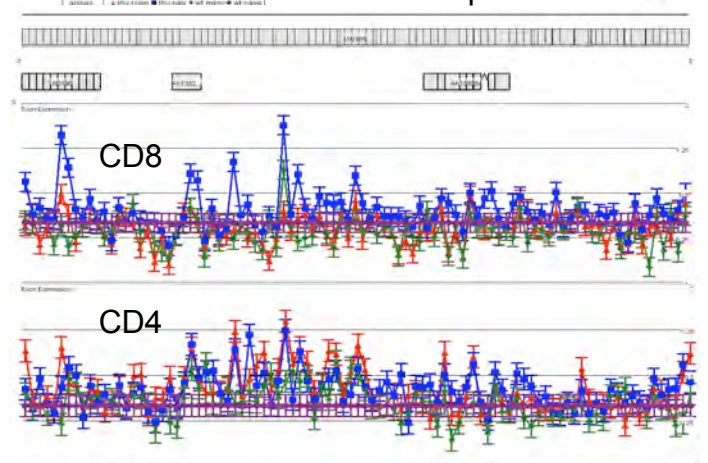

### Zfp385 exons and transcripts

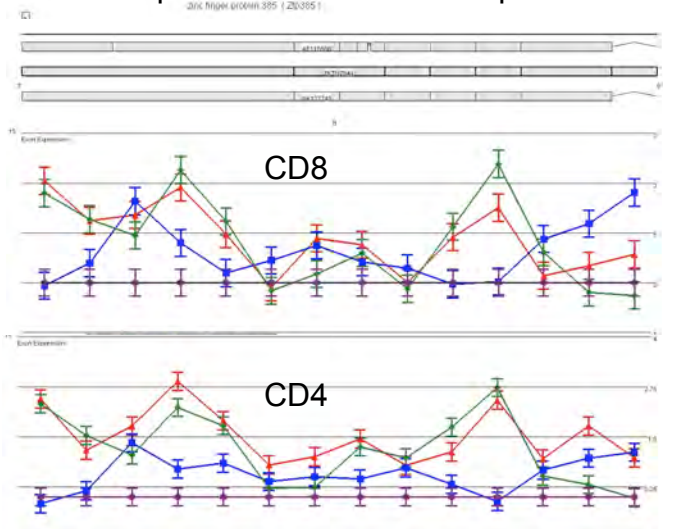

### Zxdc exons and transcripts

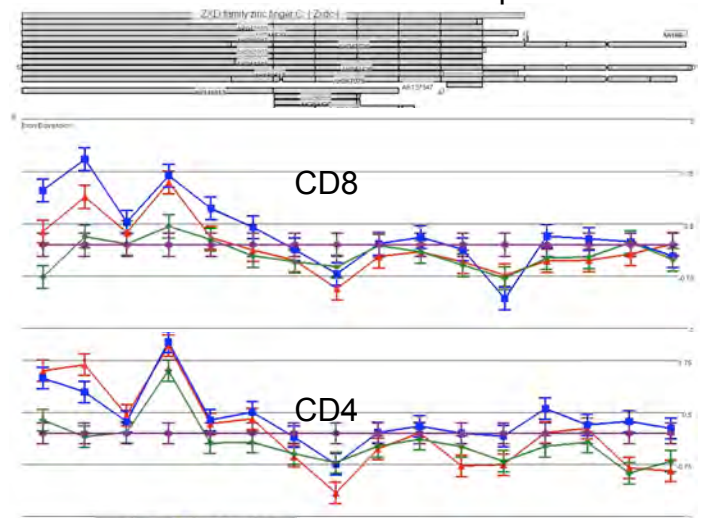



# Stat5a

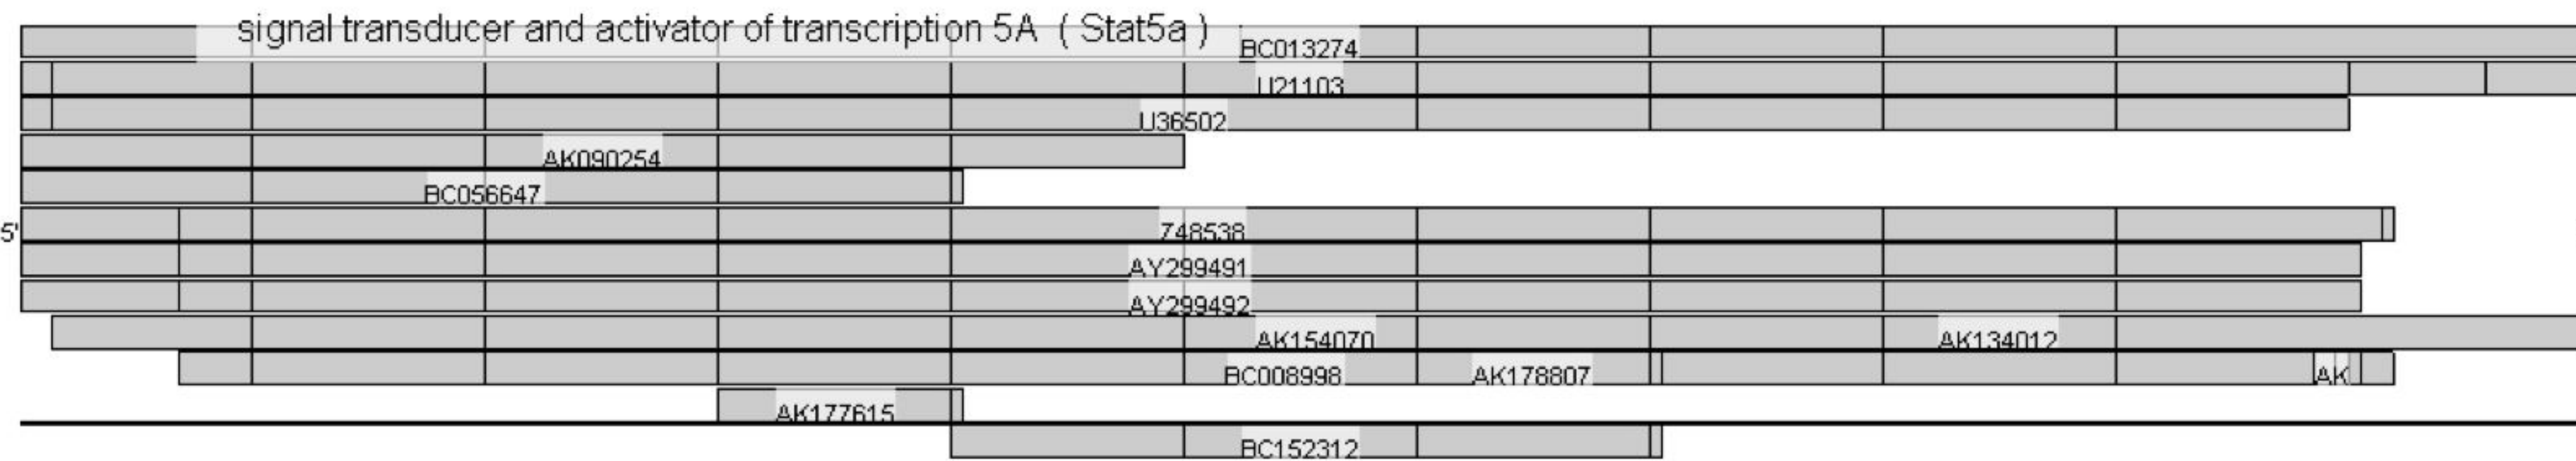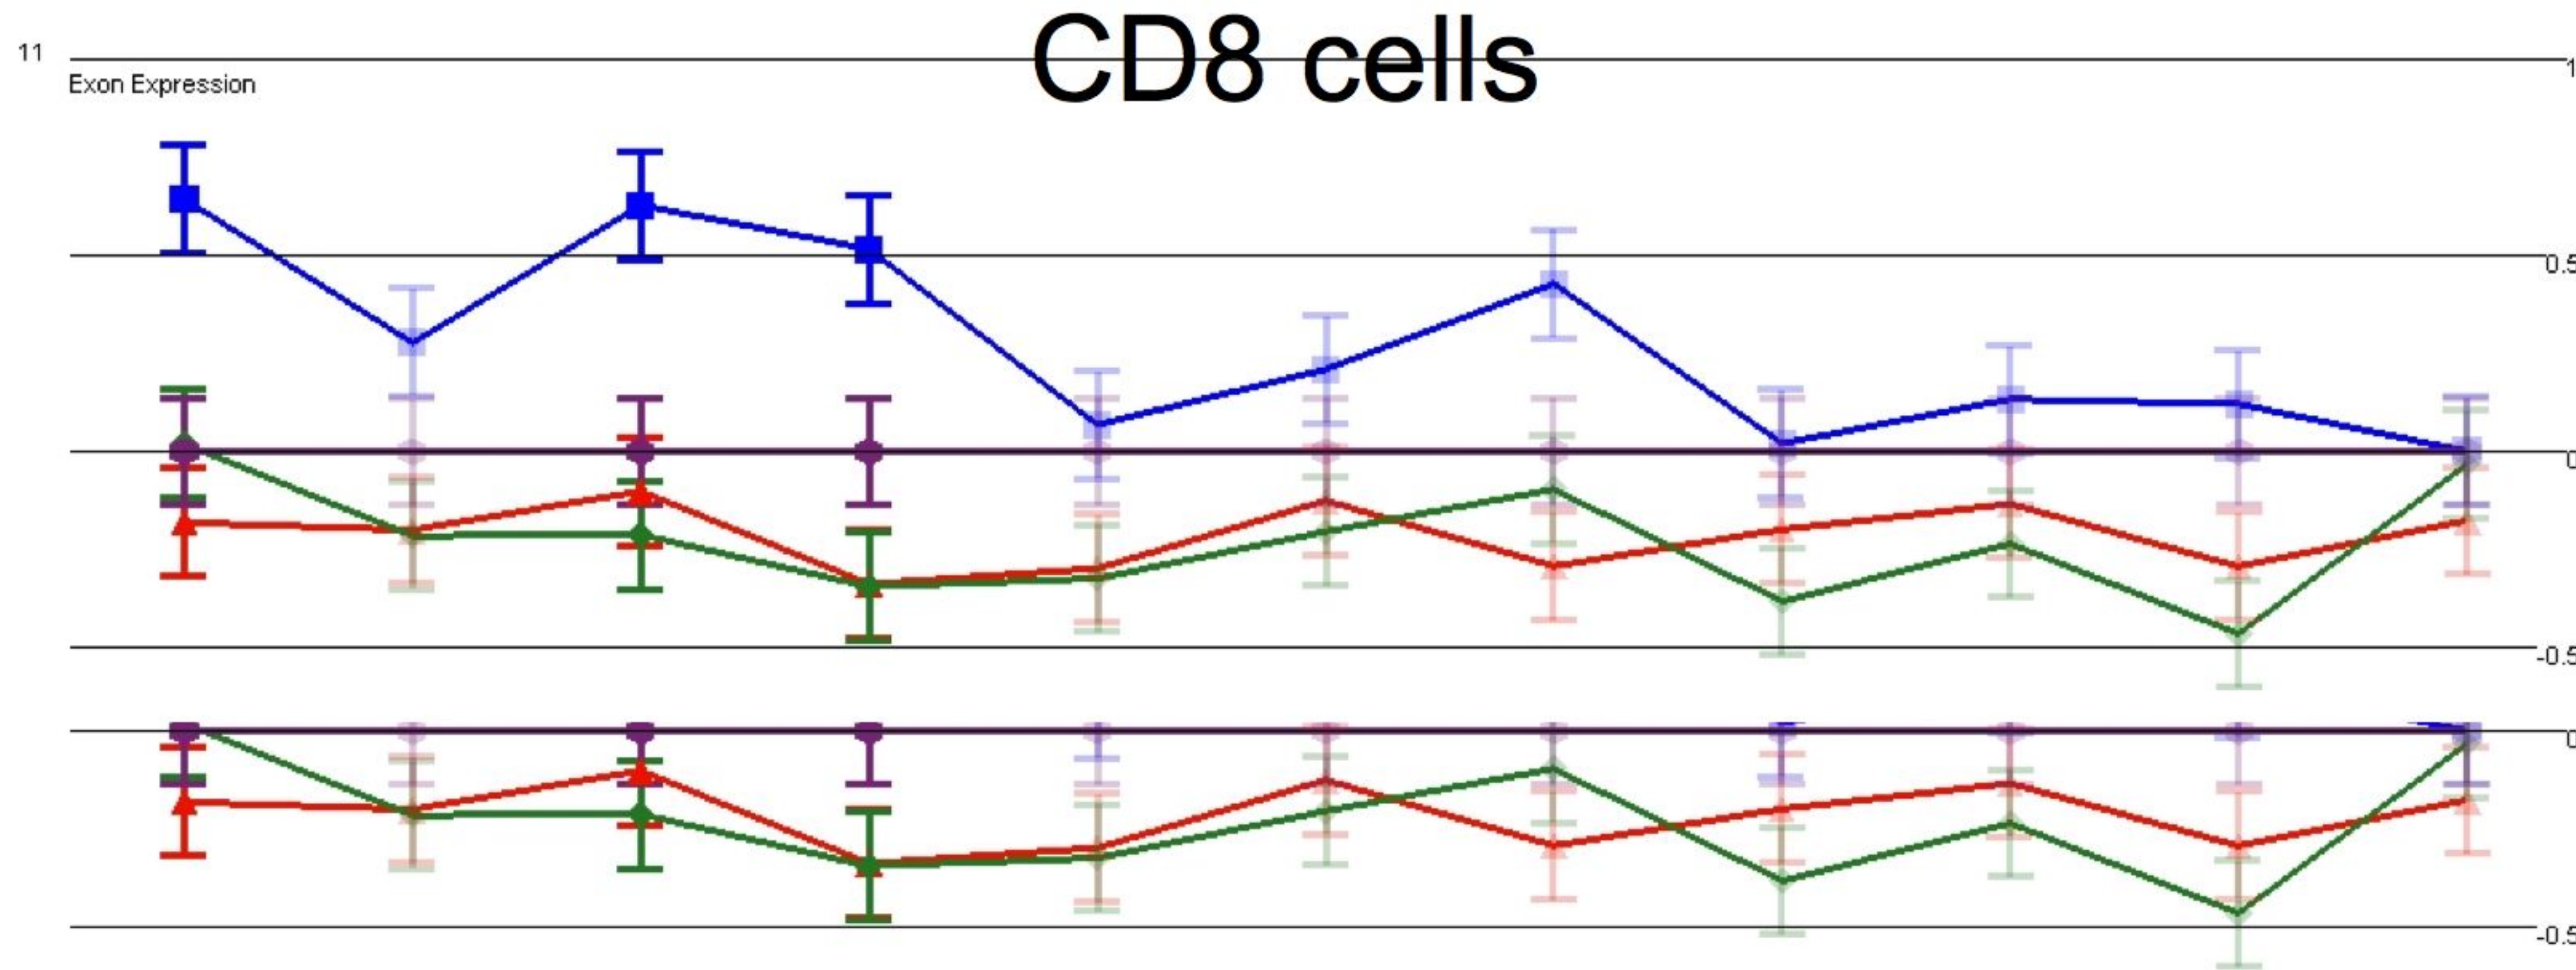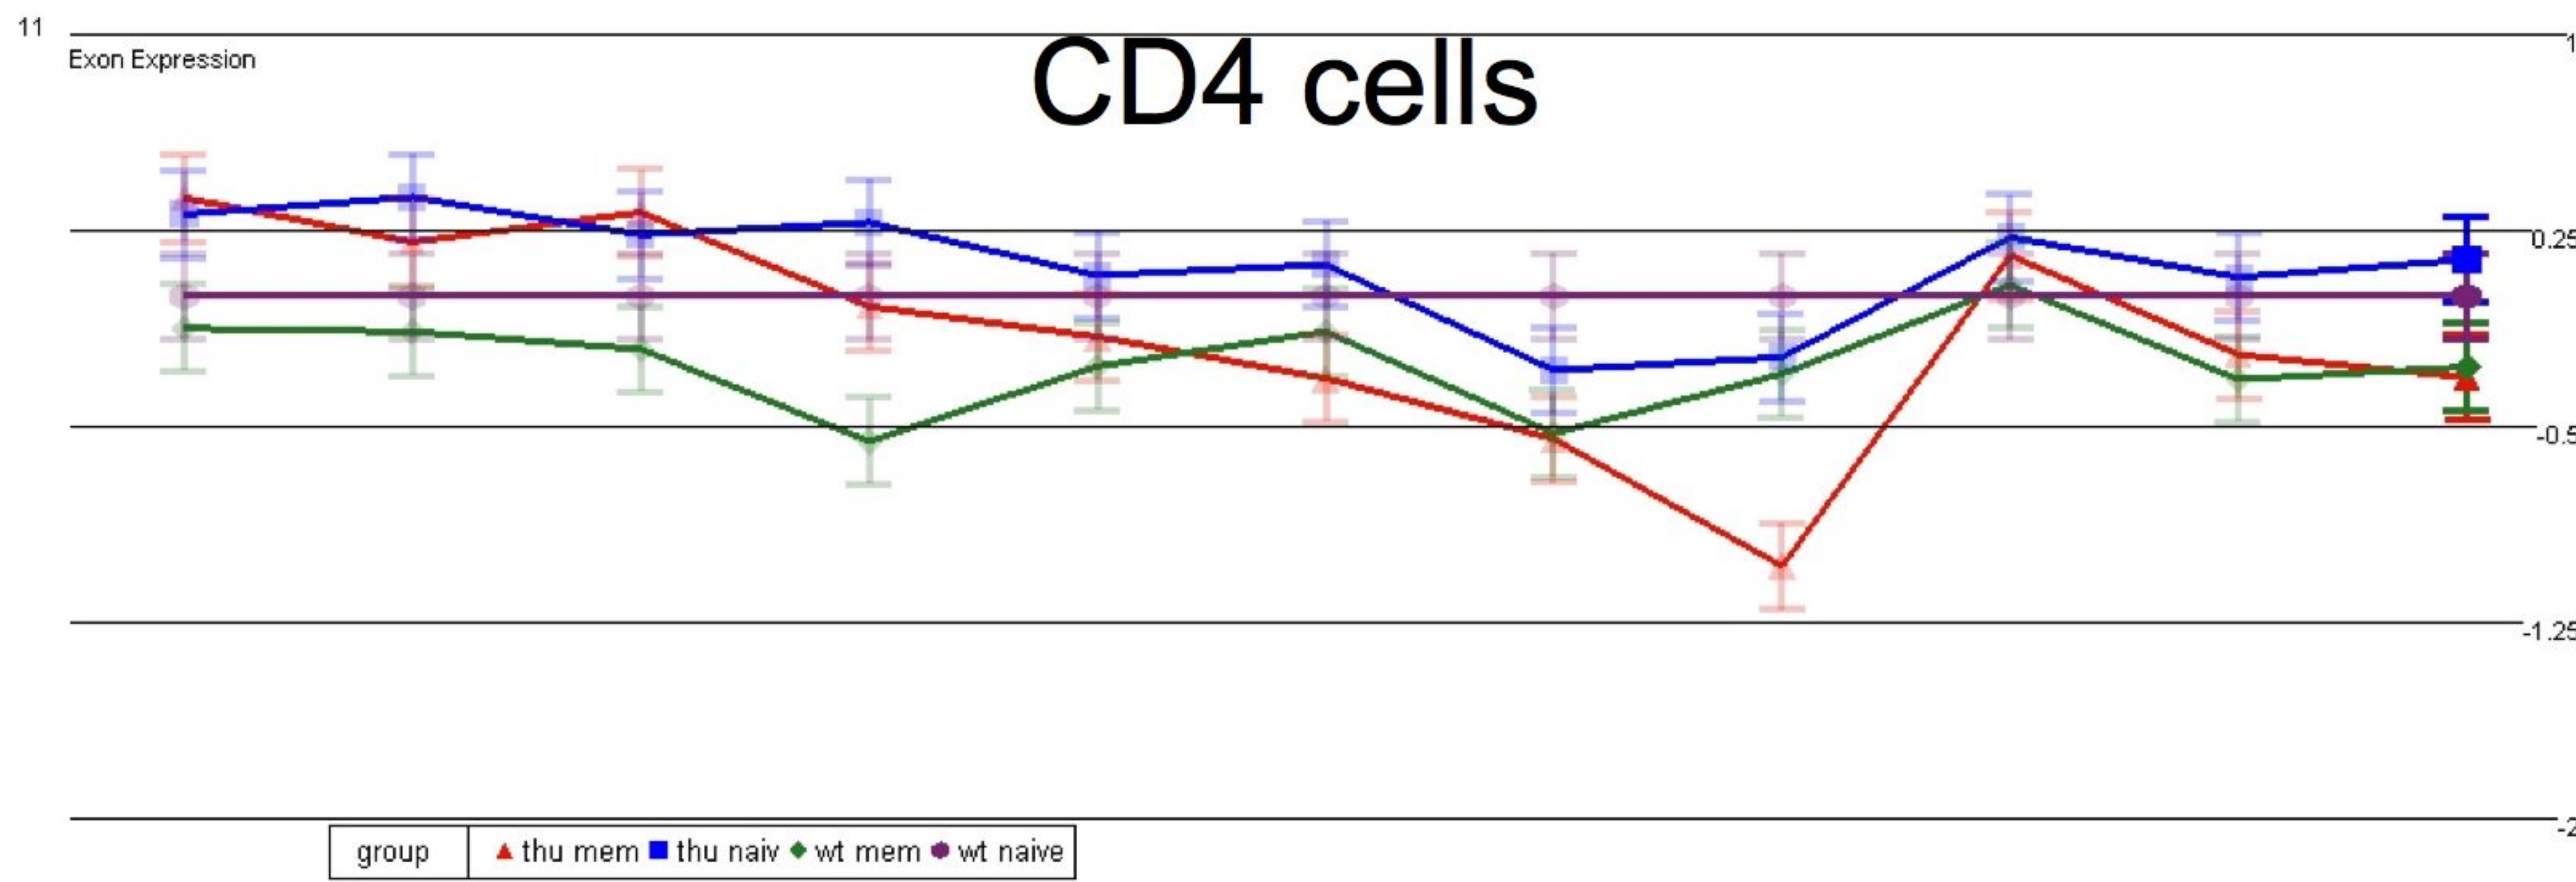

# CD44

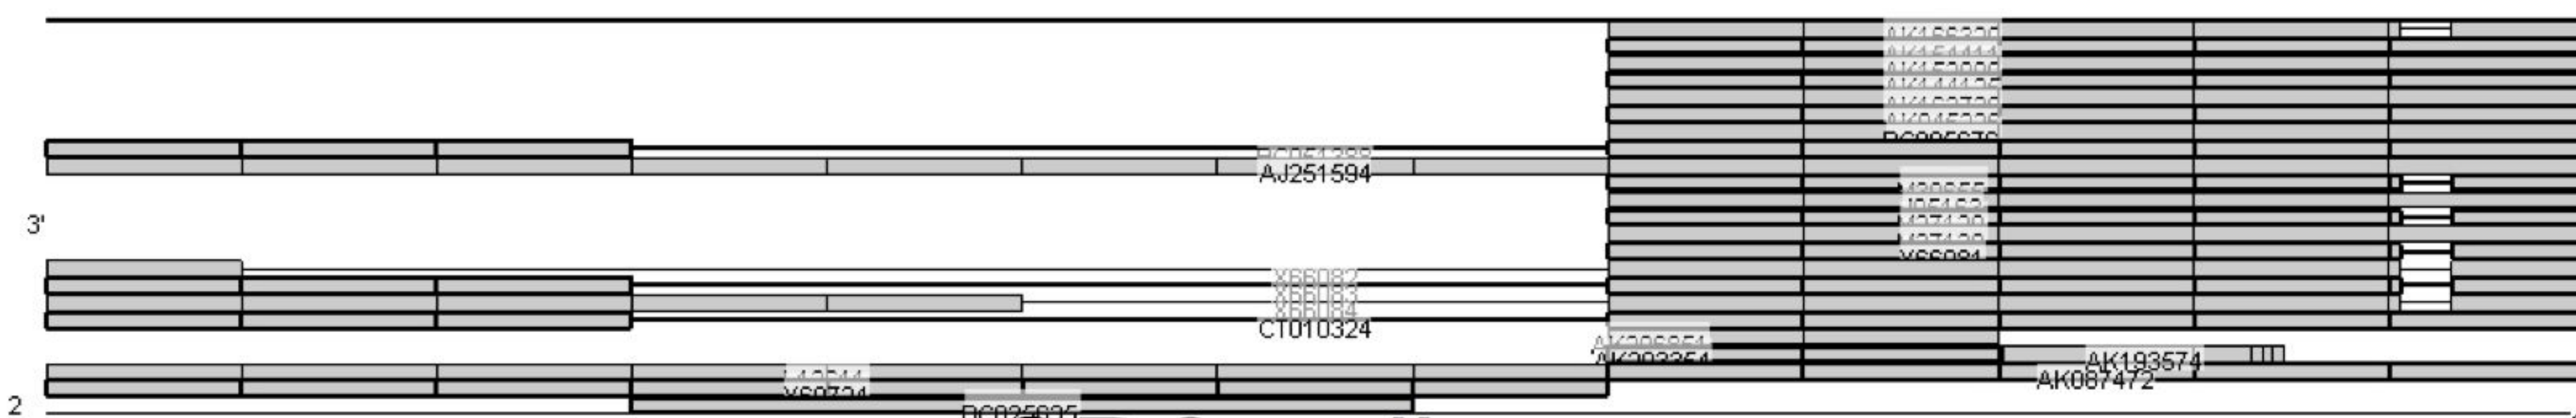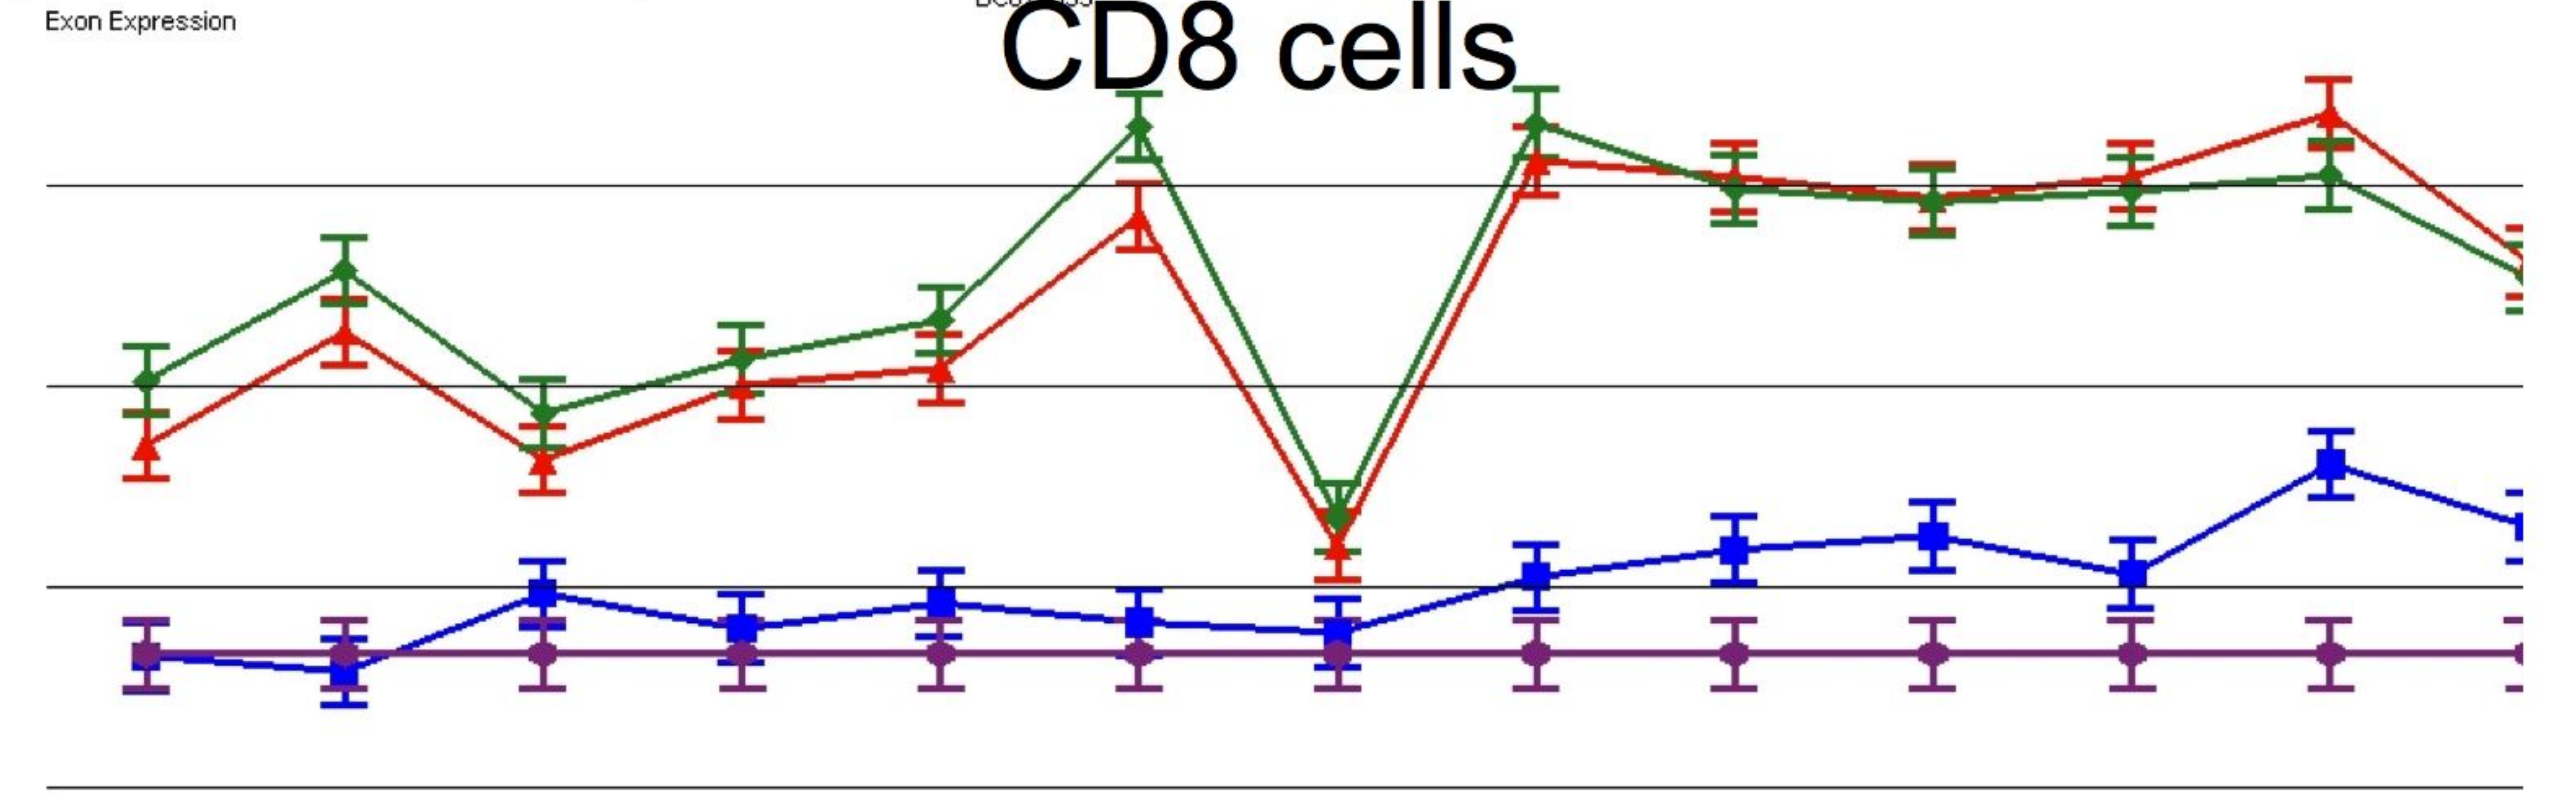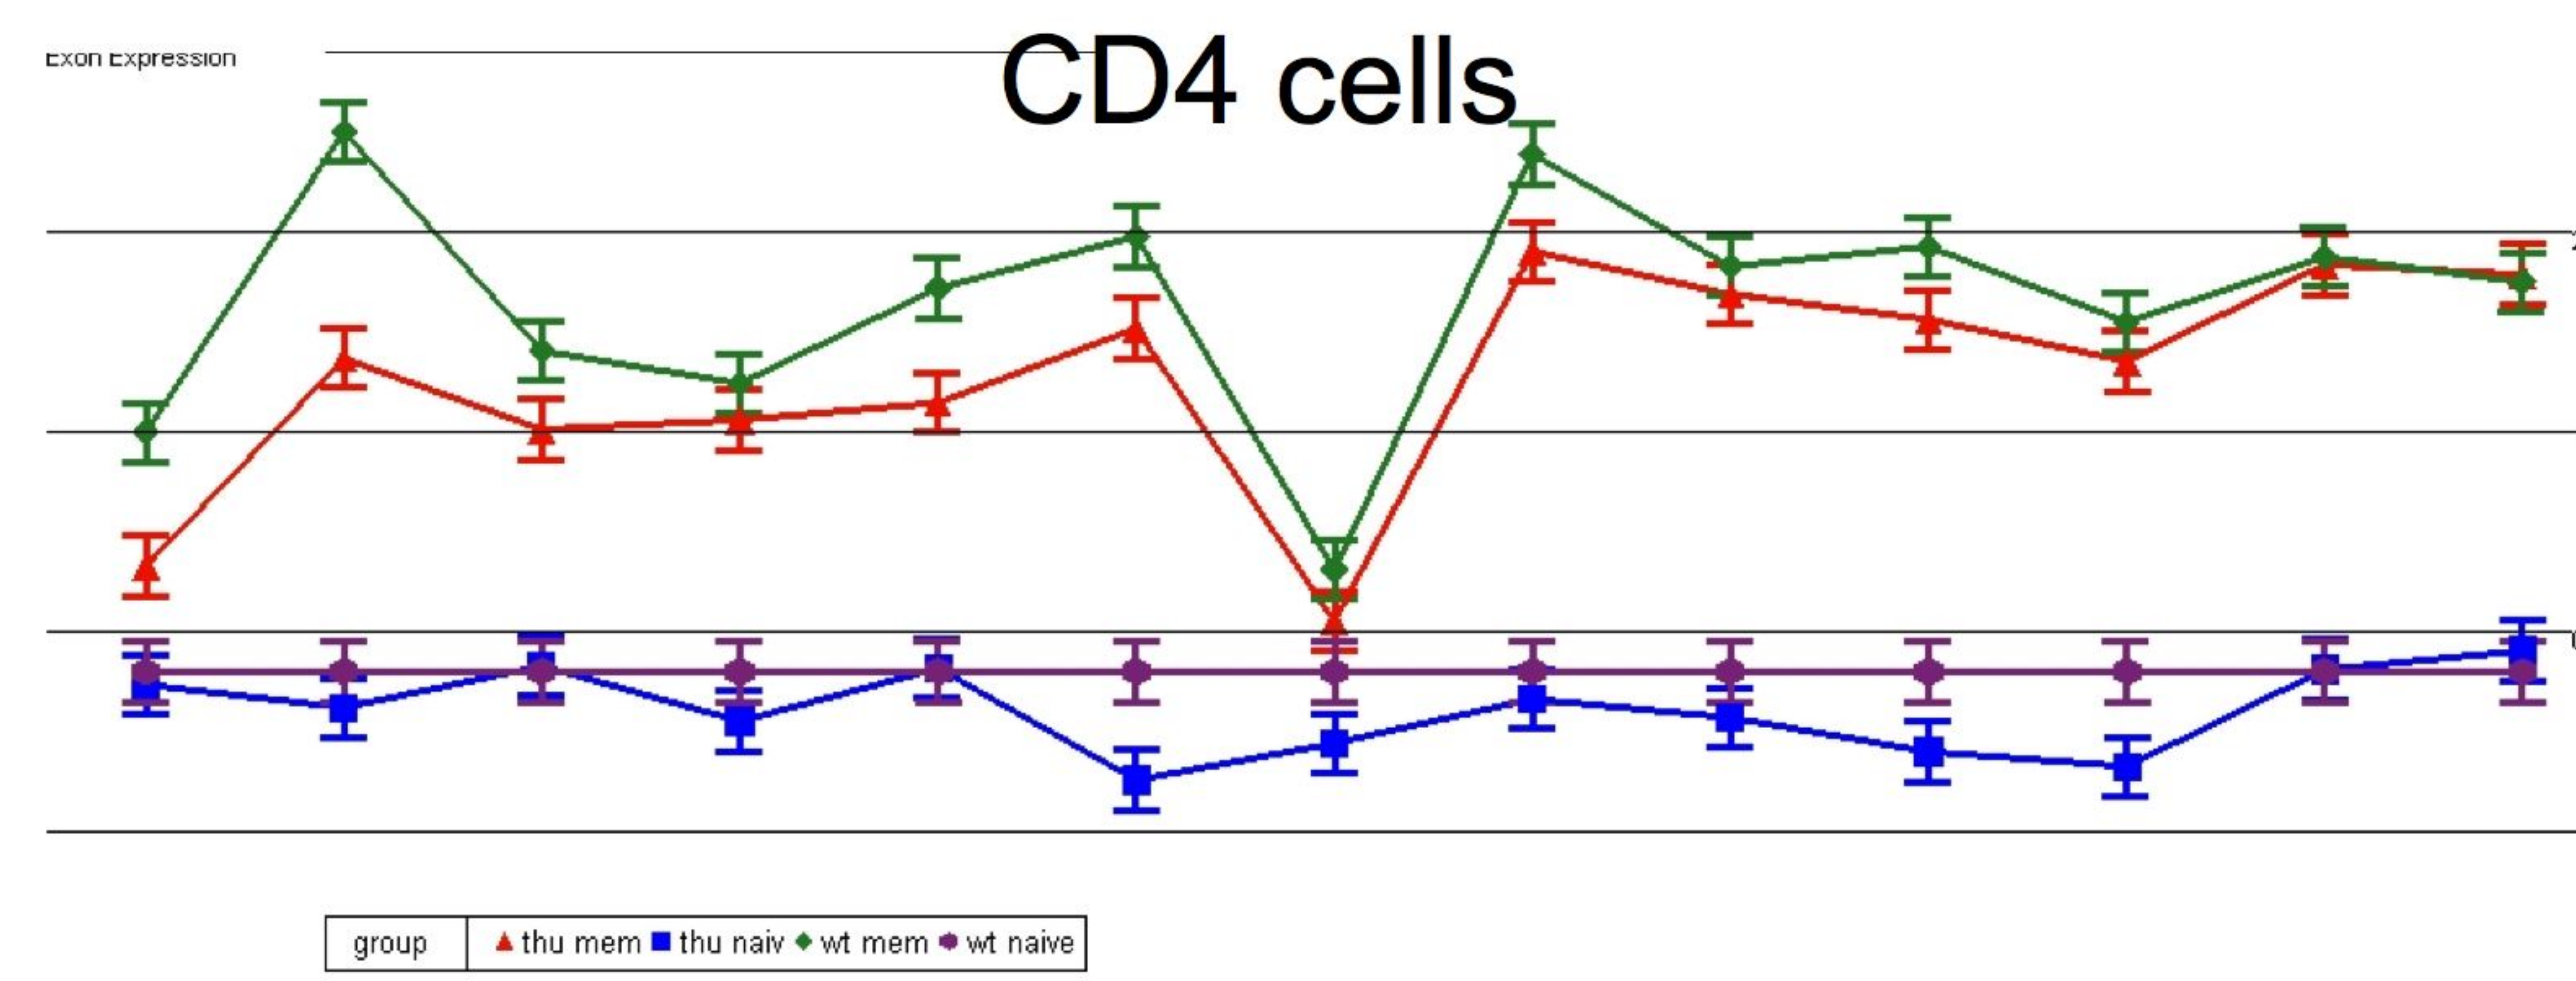

| <b>Cell type comparison</b> | <b>ANOVA P value (probeset x genotype)</b> | <b>FDR by step-up method (Benjamini &amp; Hochberg, 1995)</b> |
|-----------------------------|--------------------------------------------|---------------------------------------------------------------|
| naïve CD4 thu vs wt         | 0.001                                      | 0.012                                                         |
| naïve CD4 thu vs wt         | 0.010                                      | 0.061                                                         |
| naïve CD4 thu vs wt         | 0.050                                      | 0.189                                                         |
| naïve CD8 thu vs wt         | 0.001                                      | 0.029                                                         |
| naïve CD8 thu vs wt         | 0.010                                      | 0.117                                                         |
| naïve CD8 thu vs wt         | 0.050                                      | 0.306                                                         |
| memory CD4 thu vs wt        | 0.001                                      | 0.048                                                         |
| memory CD4 thu vs wt        | 0.010                                      | 0.162                                                         |
| memory CD4 thu vs wt        | 0.050                                      | 0.369                                                         |
| memory CD8 thu vs wt        | 0.001                                      | 0.059                                                         |
| memory CD8 thu vs wt        | 0.010                                      | 0.208                                                         |
| memory CD8 thu vs wt        | 0.050                                      | 0.463                                                         |
| wt naïve v memory CD4       | 0.001                                      | 0.036                                                         |
| wt naïve v memory CD4       | 0.010                                      | 0.224                                                         |
| wt naïve v memory CD4       | 0.050                                      | 0.693                                                         |
| wt naïve v memory CD8       | 0.001                                      | 0.026                                                         |
| wt naïve v memory CD8       | 0.010                                      | 0.182                                                         |
| wt naïve v memory CD8       | 0.050                                      | 0.607                                                         |

Wu Supp Table 1: False Discovery Rates

| Gene Symbol          | Protein Name                                             | Function                                                           | Neural Splicing Published | Conserved in human | No cell types p<0.05 | No cell types p<0.001 | p value wt v th CD4 | P value wt vs th CD4 | p value wt vs th CD8 | p value wt vs th naïve CD8 | p value wt vs th thymus CD8SP | p value wt vs th CD4SP | P-value WT naïve v WT memory CD4 | P-value WT naïve v WT memory CD8 |
|----------------------|----------------------------------------------------------|--------------------------------------------------------------------|---------------------------|--------------------|----------------------|-----------------------|---------------------|----------------------|----------------------|----------------------------|-------------------------------|------------------------|----------------------------------|----------------------------------|
| <b>Ptprc (CD45)</b>  | protein tyrosine phosphatase receptor C (CD45)           | TCR signalling                                                     | no                        | yes                | 5                    | 5                     | 6.30E-06            | 1.87E-21             | 0.000626             | 0.416078                   | 0.00075274                    | 6.23E-13               | 0.261298                         | 0.996406                         |
| <b>Leng8</b>         | leukocyte receptor cluster (LRC) member 8                | signalling?                                                        | no                        | ?                  | 4                    | 3                     | 0.006587            | 0.0002871            | 3.60E-07             | 0.00033574                 | 0.954812                      | 0.97432                | 0.0495943                        | 0.94133                          |
| <b>Mobp</b>          | myelin-associated oligodendrocytic basic protein         | myelin sheath                                                      | yes                       | yes                | 4                    | 3                     | 2.52E-05            | 0.0006332            | 0.0002979            | 0.00579835                 | 0.951833                      | 0.555057               | 0.145585                         | 0.500468                         |
| <b>Smn1</b>          | survival motor neuron 1                                  | splicing factor                                                    | yes                       | yes                | 4                    | 3                     | 0.000365            | 1.56E-05             | 5.49E-05             | 0.00533134                 | 0.890278                      | 0.700891               | 0.545616                         | 0.967199                         |
| <b>Kif21a</b>        | kinesin family member 21A                                | intracellular transport                                            | yes                       | yes                | 4                    | 3                     | 3.01E-09            | 3.94E-07             | 0.0149672            | 1.28E-05                   | 0.991992                      | 0.823922               | 0.975008                         | 0.487182                         |
| <b>Grip1</b>         | glutamate receptor interacting protein 1                 | intracellular adaptor & targetting, adhesion, neural dendrites     | yes                       | yes                | 4                    | 3                     | 3.91E-10            | 0.0374348            | 3.67E-05             | 3.91E-08                   | 0.95244                       | 0.960712               | 0.987967                         | 0.277761                         |
| <b>Itns1</b>         | intersectin 1 (SH3 domain protein 1A)                    | endocytosis & signalling                                           | yes                       | yes                | 4                    | 2                     | 0.0225853           | 5.55E-05             | 0.0089652            | 2.70E-05                   | 0.982168                      | 0.962889               | 9.58E-25                         | 3.31E-13                         |
| <b>Ptprt</b>         | protein tyrosine phosphatase receptor rho                | Homophilic cell-cell signalling                                    | yes                       | yes                | 4                    | 2                     | 0.0017147           | 1.43E-06             | 7.65E-05             | 0.0400525                  | 0.981391                      | 0.99595                | 5.33E-14                         | 0                                |
| <b>Unk</b>           | unkempt homolog, C3H zinc finger protein 5               | unknown                                                            | no                        | ?                  | 4                    | 2                     | 0.0039706           | 0.0001061            | 0.0038239            | 4.92E-05                   | 0.998236                      | 0.992372               | 0.0009566                        | 0.988875                         |
| <b>Pigw</b>          | phosphatidylinositol glycan anchor biosynthesis W        | GPI synthesis, membrane protein maturation                         | no                        | ?                  | 4                    | 2                     | 0.0089198           | 0.0001904            | 2.38E-05             | 0.00333339                 | 0.926295                      | 0.949688               | 0.015284                         | 0.755938                         |
| <b>Gabbr1</b>        | gamma-aminobutyric acid (GABA-B) receptor                | GABA signalling                                                    | yes                       | yes                | 4                    | 2                     | 0.0033755           | 0.003652             | 4.72E-05             | 5.23E-07                   | 0.954084                      | 0.941142               | 0.022304                         | 0.0503995                        |
| <b>Rps6kb2</b>       | S6Kb, ribosomal protein S6 kinase beta                   | intracellular signalling                                           | ?                         | ?                  | 4                    | 2                     | 0.0050055           | 5.66E-05             | 0.0145281            | 3.69E-06                   | 0.999531                      | 0.973144               | 0.0809972                        | 0.992271                         |
| <b>Cadps2</b>        | Ca2+-dependent activator protein for secretion 2         | vesicle transport and targetting, calcium response                 | yes                       | yes                | 4                    | 2                     | 0.000229            | 0.0021705            | 0.0086284            | 9.41E-10                   | 0.402832                      | 0.987836               | 0.111572                         | 0.244762                         |
| <b>Otof</b>          | otoferlin                                                | calcium signalling, hearing                                        | yes                       | yes                | 4                    | 2                     | 0.0001678           | 0.0038077            | 0.0182671            | 1.45E-05                   | 0.999529                      | 0.999868               | 0.344466                         | 0.920943                         |
| <b>Cobl</b>          | cordon-bleu                                              | actin cytoskeleton, neurite growth & branching                     | yes                       | yes                | 4                    | 2                     | 3.24E-05            | 2.10E-06             | 0.0270493            | 0.00220533                 | 0.566075                      | 0.986604               | 0.399575                         | 0.886559                         |
| <b>Foxd1</b>         | forkhead box D1, BF-2, brain factor 2                    | transcription, neural development                                  | no                        | no                 | 4                    | 2                     | 0.0018806           | 0.0008678            | 0.0602315            | 0.0149609                  | 0.0005307                     | 0.591378               | 0.448742                         | 0.563712                         |
| <b>Ttc23</b>         | tetratricopeptide repeat domain 23                       | unknown                                                            | no                        | ?                  | 4                    | 2                     | 0.0004533           | 0.0086577            | 0.0002727            | 0.00461283                 | 0.924113                      | 0.131236               | 0.64848                          | 0.857539                         |
| <b>Sorbs2 )</b>      | ArgBP2, Arg-binding protein 2, sorbin and SH3 domain cor | Abl/Arg signalling, cytoskeleton, neurite growth                   | yes                       | yes                | 4                    | 2                     | 0.0007947           | 0.0103388            | 0.0250927            | 0.00060531                 | 0.999802                      | 0.998977               | 0.665895                         | 0.97655                          |
| <b>Mlx</b>           | MAX-like protein X , BigMAX                              | Myc/MAX transcription                                              | yes                       | yes                | 4                    | 2                     | 0.0001335           | 0.0005111            | 0.0016486            | 0.00196302                 | 0.899736                      | 0.370709               | 0.782533                         | 0.938605                         |
| <b>Ube1l</b>         | ubiquitin-activating enzyme E1-like                      | ISGylation, interferon response                                    | no                        | ?                  | 4                    | 2                     | 0.0099546           | 4.32E-05             | 0.0141134            | 2.07E-06                   | 0.997997                      | 0.998421               | 0.967224                         | 0.961086                         |
| <b>Osbpl1a</b>       | oxysterol binding protein-like 1A                        | endocytosis & lipid metabolism                                     | yes                       | yes                | 4                    | 1                     | 0.0142533           | 0.0001024            | 0.0425186            | 0.00422772                 | 0.999987                      | 0.991067               | 5.68E-09                         | 0.0006192                        |
| <b>Pctk1</b>         | PCTAIRE-motif protein kinase 1                           | neurite growth, vesicle transport                                  | yes                       | ?                  | 4                    | 1                     | 0.0174091           | 0.0106006            | 0.0140768            | 0.00027502                 | 0.999094                      | 0.890876               | 0.0286842                        | 0.644743                         |
| <b>Scube3</b>        | signal peptide, CUB domain, EGF-like 3                   | unknown                                                            | no                        | ?                  | 4                    | 1                     | 0.0065946           | 0.0011077            | 0.0268514            | 0.00027474                 | 0.858606                      | 0.952558               | 0.0553291                        | 0.0033521                        |
| <b>Slc38a11</b>      | solute carrier family 38, member 11                      | putative transporter                                               | no                        | ?                  | 4                    | 1                     | 0.0004687           | 0.0228921            | 0.0278889            | 0.0484205                  | 0.844192                      | 0.916058               | 0.0630483                        | 0.0430996                        |
| <b>Cpsf4</b>         | cleavage and polyadenylation specific factor 4 (30kD)    | poly A site recognition, transcriptional pausing & cleavage, splic | no                        | yes                | 4                    | 1                     | 0.0022052           | 0.019108             | 8.67E-05             | 0.0446332                  | 0.998448                      | 0.911022               | 0.0635906                        | 0.789204                         |
| <b>Nphp4</b>         | nephronophthisis 4                                       | primary cilium, transport & cytoskeleton                           | ?                         | yes                | 4                    | 1                     | 0.001545            | 4.49E-06             | 0.0114074            | 0.00477619                 | 0.681373                      | 0.997214               | 0.108076                         | 0.477469                         |
| <b>Dync1i1</b>       | dynein cytoplasmic 1 intermediate chain 1                | intracellular transport                                            | yes                       | yes                | 4                    | 1                     | 0.0413449           | 7.71E-08             | 0.0032208            | 0.0331637                  | 0.275046                      | 0.999718               | 0.169231                         | 0.882967                         |
| <b>Ptprk</b>         | protein tyrosine phosphatase receptor type K             | Homophilic cell-cell signalling                                    | yes                       | yes                | 3                    | 3                     | 0.0004069           | 0.0530596            | 1.54E-05             | 1.11E-12                   | 0.99994                       | 0.990722               | 0.991378                         | 2.07E-05                         |
| <b>1520401A03Rik</b> | unknown                                                  | unknown                                                            | no                        | ?                  | 3                    | 2                     | 0.0506364           | 0.0032833            | 0.0005668            | 0.00023328                 | 0.970987                      | 0.930584               | 8.16E-07                         | 0.0739707                        |
| <b>Kcnp2</b>         | KCHIP2, Kv channel-interacting protein 2                 | K channel & calcium signalling                                     | yes                       | yes                | 3                    | 2                     | 0.0002644           | 0.0021719            | 0.350955             | 1.66E-08                   | 0.853563                      | 0.995556               | 0.0006754                        | 0.84625                          |
| <b>Nfatc1</b>        | nuclear factor of activated T-cells cytoplasmic 1        | transcription, TCR signalling                                      | ?                         | yes                | 3                    | 2                     | 0.0071347           | 0.0001307            | 0.24282              | 0.000668                   | 0.998839                      | 0.999167               | 0.0007609                        | 0.45094                          |
| <b>Atp13a2</b>       | ATPase type 13A2                                         | P5 family of ATPase - possibly calcium pump                        | yes                       | ?                  | 3                    | 1                     | 0.0761357           | 0.0094429            | 5.53E-05             | 0.00403596                 | 0.986225                      | 0.99991                | 7.90E-07                         | 0.0002027                        |
| <b>Rhbf1</b>         | rhomboid family 1                                        | TGFalpha/EGFR signalling, possible 7TM protease                    | no                        | ?                  | 3                    | 1                     | 0.0116824           | 4.59E-05             | 0.48761              | 0.00327903                 | 0.981617                      | 0.996603               | 2.05E-06                         | 0.127328                         |
| <b>Mus81</b>         | MUS81 endonuclease homolog                               | DNA damage repair & tolerance                                      | no                        | ?                  | 3                    | 1                     | 0.0013879           | 0.0003322            | 0.489488             | 0.0146492                  | 0.987895                      | 0.772735               | 0.0005865                        | 0.52523                          |

Wu Supp Table 2:  
Group A Genes

| Gene Symbol          | Protein Name                                                    | Function                                                    | Neural Splicing Published | Conserved in human | No cell types p<0.05 | No cell types p<0.001 | p value wt v th memory CD4 | P value wt vs th naive CD4 | p value wt vs th memory CD8 | p value wt vs th naive CD8 | p value wt vs th thymus CD8SP | p value wt vs th thymus CDASP | p value WT v WT memory CD4 | P-value WT naive v WT memory CD8 |
|----------------------|-----------------------------------------------------------------|-------------------------------------------------------------|---------------------------|--------------------|----------------------|-----------------------|----------------------------|----------------------------|-----------------------------|----------------------------|-------------------------------|-------------------------------|----------------------------|----------------------------------|
| <i>Nlrp1a</i>        | Nalp1, NACHT leucine rich repeat and PYD containing 1           | pathogen response, inflammation, apoptosis                  | no                        | yes                | 6                    | 5                     | 0.0333499                  | 0.000103                   | 4.22E-18                    | 1.16E-05                   | 3.42E-08                      | 1.35E-21                      | 0.994205                   | 0.528491                         |
| <i>Slc15a2</i>       | solute carrier family 15 (H+/peptide transporter)               | di- and tri-peptide transport across membranes              | no                        | ?                  | 4                    | 4                     | 2.70E-05                   | 9.26E-06                   | 8.30E-14                    | 4.96E-10                   | 0.491784                      | 0.447847                      | 4.83E-14                   | 0.980473                         |
| <i>Spnb2</i>         | spectrin beta 2                                                 | membrane cytoskeleton & cell shape                          | yes                       | yes                | 4                    | 4                     | 0.0006838                  | 8.74E-15                   | 4.35E-13                    | 9.37E-06                   | 0.931711                      | 0.958482                      | 1.36E-07                   | 0.887075                         |
| <i>Tle1</i>          | Grg1, Groucho-related gene 1, transducin-like enhancer of spi   | transcription, TCF/LEF & RUNX corepressor, Wnt signalli     | no                        | yes                | 4                    | 4                     | 0.0002036                  | 3.52E-13                   | 5.09E-05                    | 8.73E-14                   | 0.270171                      | 0.337821                      | 0.01134                    | 0.023389                         |
| <i>Thns1</i>         | threonine synthase-like 1                                       | metabolism? Phospho-lyase?                                  | no                        | ?                  | 4                    | 3                     | 0.0198129                  | 9.02E-06                   | 1.43E-05                    | 0.0001755                  | 0.67467                       | 0.715841                      | 0.171314                   | 0.697691                         |
| <i>Zfp692</i>        | zinc finger protein 692                                         | transcription, AMPK signalling, gluconeogenesis             | no                        | ?                  | 4                    | 3                     | 0.0001167                  | 0.000927                   | 0.0195465                   | 3.62E-07                   | 0.998356                      | 0.916524                      | 0.358552                   | 0.821561                         |
| <i>Man2a2</i>        | mannosidase 2, alpha 2                                          | N-linked glycan processing                                  | no                        | ?                  | 4                    | 3                     | 0.0135135                  | 0.000412                   | 1.85E-06                    | 0.0001982                  | 0.926074                      | 0.884787                      | 0.670316                   | 0.850888                         |
| <i>Cd247</i>         | CD247, CD3 zeta, theta, eta & iota                              | TCR assembly, signalling, trafficking                       | no                        | no                 | 4                    | 2                     | 0.0187033                  | 0.008873                   | 0.0001376                   | 4.73E-07                   | 0.985803                      | 0.941899                      | 3.38E-06                   | 0.664266                         |
| <i>Fermt3</i>        | Kindlin3                                                        | integrin adhesion, cytoskeleton, platelet activation        | yes                       | yes                | 4                    | 2                     | 0.0016346                  | 0.000557                   | 1.04E-05                    | 0.007918                   | 0.629075                      | 0.920773                      | 0.000991                   | 0.999769                         |
| <i>Prpf4b</i>        | PRP4, pre-mRNA processing factor 4 homolog B                    | splicing, phosphorylation of non-SR splicing factors, trans | no                        | ?                  | 4                    | 2                     | 0.0017652                  | 1.32E-07                   | 0.0002783                   | 0.0017653                  | 0.99762                       | 0.97813                       | 0.0013                     | 0.945416                         |
| <i>Tpr</i>           | translocated promoter region                                    | nuclear pore complex & nuclear architecture, nucleocytop    | no                        | ?                  | 4                    | 2                     | 0.033201                   | 2.05E-11                   | 9.40E-05                    | 0.0450269                  | 0.999995                      | 0.750315                      | 0.002053                   | 0.993357                         |
| <i>Bcl2l11</i>       | Bim, BCL2-like 11                                               | triggering of apoptosis                                     | no                        | similar            | 4                    | 2                     | 1.52E-05                   | 9.87E-05                   | 0.0163195                   | 0.0059476                  | 0.995467                      | 0.911252                      | 0.004227                   | 0.966022                         |
| <i>Ccnl2</i>         | cyclin L2                                                       | splicing, neuronal plasticity & development                 | yes                       | yes                | 4                    | 2                     | 0.0090295                  | 7.69E-09                   | 1.80E-07                    | 0.0151181                  | 0.785663                      | 0.340948                      | 0.017629                   | 0.975545                         |
| <i>Ankra2</i>        | ankyrin repeat family A (RFXANK-like) 2                         | BK Ca channel and LDL receptor modulation, histone ace      | no                        | ?                  | 4                    | 2                     | 0.0013483                  | 0.006665                   | 0.0005089                   | 2.67E-06                   | 0.992153                      | 0.560406                      | 0.037152                   | 0.923175                         |
| <i>Gtf3c2</i>        | general transcription factor IIIC polypeptide 2 beta            | RNA Pol3 transcription                                      | no                        | ?                  | 4                    | 2                     | 0.0065141                  | 7.41E-05                   | 0.001792                    | 0.0003842                  | 0.785439                      | 0.993458                      | 0.051885                   | 0.657976                         |
| <i>Pax6</i>          | paired box gene 6                                               | transcription, eye & CNS development                        | yes                       | yes                | 4                    | 2                     | 0.0380728                  | 0.225075                   | 0.0143756                   | 8.83E-05                   | 0.000772                      | 0.670191                      | 0.054004                   | 0.428765                         |
| <i>Ufc1</i>          | USP21 ubiquitin-fold modifier conjugating enzyme 1              | de-ubiquitination & de-NEDDylation                          | no                        | ?                  | 4                    | 2                     | 0.0048312                  | 4.79E-10                   | 0.0001928                   | 0.0266233                  | 0.994788                      | 0.99796                       | 0.188442                   | 0.0598025                        |
| <i>Rpain</i>         | RIP, RPA interacting protein                                    | DNA replication, repair & recombination                     | no                        | yes                | 4                    | 2                     | 0.0330886                  | 6.54E-05                   | 0.0215877                   | 0.161365                   | 0.481821                      | 0.000586                      | 0.243155                   | 0.941839                         |
| <i>Map3k7</i>        | TAK1, Tgf-beta activated kinase 1                               | TCR, TLR, NFkB signaling                                    | no                        | yes                | 4                    | 2                     | 0.000923                   | 0.048793                   | 0.0058786                   | 0.0001172                  | 0.720198                      | 0.245233                      | 0.243486                   | 0.30049                          |
| <i>Lrd</i>           | PIDD, p53-induced death domain, leucine-rich and death dom      | p53 induced apoptosis and NFkB induction                    | no                        | ?                  | 4                    | 1                     | 0.0018979                  | 5.52E-05                   | 0.0410679                   | 0.0138404                  | 0.996805                      | 0.546922                      | 0.003715                   | 0.022405                         |
| <i>Thrap3</i>        | Trap150, thyroid hormone receptor associated protein            | RNA Pol2 transcription, possibly mRNA processing            | no                        | ?                  | 4                    | 1                     | 0.0068828                  | 0.000282                   | 0.0013589                   | 0.0273623                  | 0.962685                      | 0.996527                      | 0.003987                   | 0.958073                         |
| <i>Tbxa2r</i>        | thromboxane A2 receptor                                         | arachidonic acid signalling                                 | no                        | ?                  | 4                    | 1                     | 0.0349245                  | 0.001453                   | 0.0006109                   | 0.0088525                  | 0.83153                       | 0.373352                      | 0.012264                   | 0.749185                         |
| <i>Rragc</i>         | Ras-related GTP binding C                                       | nucleocytoplasmic transport                                 | no                        | ?                  | 4                    | 1                     | 0.0110702                  | 1.67E-05                   | 0.0071533                   | 0.0464435                  | 0.997568                      | 0.930173                      | 0.028377                   | 0.840267                         |
| <i>Cnot10</i>        | Lin41, Trim71 tripartite motif-containing 71                    | cell fate determination, developmental timing               | no                        | ?                  | 4                    | 1                     | 0.0098115                  | 0.000123                   | 0.001012                    | 0.0016787                  | 0.999963                      | 0.830551                      | 0.077588                   | 0.242782                         |
| <i>Gigyf2</i>        | Grb10 interacting GYF protein 2, trinucleotide repeat containir | IGF-Grb10 signalling?                                       | no                        | ?                  | 4                    | 1                     | 0.0018973                  | 5.42E-11                   | 0.035495                    | 0.0074257                  | 0.999993                      | 0.971116                      | 0.087662                   | 0.950211                         |
| <i>Zfp598</i>        | zinc finger protein 598                                         | unknown, possible ubiquitin E3 ligase (RING finger)         | no                        | yes                | 4                    | 1                     | 0.0173252                  | 0.041011                   | 0.021954                    | 0.000306                   | 0.980152                      | 0.747752                      | 0.087871                   | 0.0167374                        |
| <i>Abcc5</i>         | ATP-binding cassette sub-family C (CFTR/MRP) member 5           | ABC-type putative transporter, unknown function             | yes                       | yes                | 4                    | 1                     | 0.0331469                  | 0.00381                    | 0.0173842                   | 1.35E-05                   | 0.999986                      | 0.980666                      | 0.111378                   | 0.40764                          |
| <i>Dido1</i>         | death inducer-obliterator 1                                     | myeloproliferation control, centrosome function             | no                        | yes                | 4                    | 1                     | 0.0076678                  | 4.27E-06                   | 0.0157789                   | 0.0331595                  | 0.997733                      | 0.985032                      | 0.127523                   | 0.997798                         |
| <i>Fbxw2</i>         | F box protein W2                                                | SCF E3 ubiquitin ligase complex substrate recognition       | no                        | ?                  | 4                    | 1                     | 0.0394073                  | 0.000199                   | 0.0070373                   | 0.0035636                  | 0.854372                      | 0.788792                      | 0.135513                   | 0.834747                         |
| <i>Mtap4</i>         | microtubule-associated protein 4                                | microtubules, cytoskeleton                                  | yes                       | ?                  | 4                    | 1                     | 0.0052277                  | 4.13E-05                   | 0.0039474                   | 0.0293176                  | 0.999665                      | 0.868981                      | 0.199743                   | 0.944898                         |
| <i>Htf9c</i>         | Hpal1 tiny fragments locus 9c                                   | possibly RNA splicing (RRM and RNA methylase domains)       | no                        | ?                  | 4                    | 1                     | 0.019489                   | 0.000311                   | 0.0472203                   | 0.0038403                  | 0.991432                      | 0.977075                      | 0.2261                     | 0.315114                         |
| <i>Tpd52l1</i>       | D53, tumor protein D52-like 1                                   | vesicle traffic & exocytosis? ASK1-JNK signaled apoptosis   | yes                       | yes                | 4                    | 1                     | 0.0285687                  | 0.001222                   | 0.0032334                   | 1.37E-05                   | 0.317225                      | 0.706502                      | 0.248273                   | 0.990948                         |
| <i>Kif23</i>         | kinesin family member 23                                        | motor protein for cytokinesis and chromosome spindle        | no                        | yes                | 3                    | 3                     | 0.72759                    | 1.02E-08                   | 0.0002938                   | 1.33E-06                   | 0.872051                      | 0.919268                      | 7.15E-38                   | 8.06E-34                         |
| <i>4932412H11Rik</i> | unknown                                                         | unknown, leucine rich repeat protein                        | no                        | ?                  | 3                    | 3                     | 0.667096                   | 5.84E-13                   | 9.91E-06                    | 3.65E-05                   | 0.997287                      | 0.999961                      | 0.003934                   | 0.803059                         |
| <i>Myo7a</i>         | myosin VIIa                                                     | cytoskeleton, motor protein, hearing & retina               | yes                       | yes                | 3                    | 2                     | 0.0009409                  | 0.492642                   | 0.0022582                   | 0.0002608                  | 0.999262                      | 0.989901                      | 1.32E-08                   | 0.63375                          |
| <i>Mid1</i>          | midline 1                                                       | unknown                                                     | no                        | ?                  | 3                    | 1                     | 0.0091484                  | 7.63E-05                   | 0.325107                    | 0.0034906                  | 0.94791                       | 0.516562                      | 1.16E-05                   | 0.566906                         |
| <i>Madd</i>          | MAP-kinase activating death domain, DENN, 1G20                  | apoptosis, sensitivity to TRAIL & TNF, NFkB signalling      | yes                       | yes                | 3                    | 1                     | 0.045361                   | 0.000738                   | 0.0326003                   | 0.153639                   | 0.999907                      | 0.999903                      | 1.90E-05                   | 0.994131                         |
| <i>Efr3a</i>         | similar to cyclin-dependent kinase 6                            | unknown                                                     | no                        | ?                  | 3                    | 1                     | 0.0096951                  | 1.96E-05                   | 0.277575                    | 0.0266789                  | 0.943638                      | 0.811493                      | 2.61E-05                   | 0.979653                         |
| <i>Fam48a</i>        | P38 interacting protein                                         | NIK-p38 signalling, mesoderm development, gastrulation      | no                        | ?                  | 3                    | 1                     | 0.007641                   | 5.40E-06                   | 0.003058                    | 0.344594                   | 0.82577                       | 0.990673                      | 0.0002                     | 0.989506                         |
| <i>Nisch</i>         | nischarin, imidazole receptor antisera-selected protein         | integrin-cytoskeleton links, endocytosis, imadazoline rece  | yes                       | yes                | 3                    | 1                     | 0.0971994                  | 8.97E-06                   | 0.0039309                   | 0.015207                   | 0.998755                      | 0.99982                       | 0.000367                   | 0.900738                         |
| <i>Wdr42a</i>        | WD repeat domain 42A                                            | unknown                                                     | no                        | yes                | 3                    | 1                     | 0.153213                   | 4.47E-08                   | 0.014842                    | 0.0441146                  | 0.976652                      | 0.548838                      | 0.000581                   | 0.760396                         |
| <i>Tcf7l2</i>        | TCF4, transcription factor 7-like 2 T-cell specific HMG-box     | transcription, WNT & Pax6 signalling, brain development,    | yes                       | yes                | 3                    | 0                     | 0.263496                   | 0.009493                   | 0.0098694                   | 0.0011678                  | 0.97697                       | 0.898899                      | 6.46E-12                   | 1.15E-16                         |
| <i>Aprt</i>          | adenine phosphoribosyl transferase                              | nucleotide synthesis & metabolism                           | no                        | ?                  | 2                    | 2                     | 0.14511                    | 8.62E-05                   | 0.179658                    | 7.20E-11                   | 0.895476                      | 0.993468                      | 3.21E-07                   | 0.0015497                        |
| <i>Ogdh</i>          | oxoglutarate dehydrogenase (lipoamide)                          | Krebs cycle metabolism                                      | no                        | ?                  | 2                    | 2                     | 0.0001072                  | 1.53E-05                   | 0.908345                    | 0.362993                   | 0.999707                      | 0.999837                      | 1.30E-06                   | 0.999369                         |
| <i>Abhd11</i>        | abhydrolase domain containing 11                                | unknown                                                     | no                        | ?                  | 2                    | 2                     | 0.160038                   | 8.54E-08                   | 0.162781                    | 2.48E-05                   | 0.999824                      | 0.729185                      | 1.98E-05                   | 0.492322                         |

Wu Supp Table 3:  
Group B Genes

| Gene Symbol          | Protein Name                                                   | # Probe Sets | Transcript ID | No cell types p<0.05 | No cell types p<0.001 | p value               | p value               | P-value                  | P-value                  |
|----------------------|----------------------------------------------------------------|--------------|---------------|----------------------|-----------------------|--------------------|--------------------|--------------------|--------------------|-----------------------|-----------------------|--------------------------|--------------------------|
|                      |                                                                |              |               |                      |                       | wt v th memory CD4 | wt vs th naïve CD4 | wt vs th naïve CD8 | wt vs th naïve CD8 | wt vs th thymus CD8SP | wt vs th thymus CD4SP | WT naïve v WT memory CD4 | WT naïve v WT memory CD8 |
| <b>Acp2</b>          | acid phosphatase 2, lysosomal                                  | 13           | 6879034       | 6                    | 5                     | 3.55E-09           | 1.15E-07           | 7.44E-10           | 9.66E-08           | 0.037614              | 1.39E-07              | 0.00026                  | 1.41E-08                 |
| <b>2310044H10Rik</b> | unknown                                                        | 11           | 6966869       | 6                    | 3                     | 0.00531            | 8.42E-07           | 1.18E-10           | 3.30E-12           | 0.001317              | 0.006016              | 0.668461                 | 0.877916                 |
| <b>Coch</b>          | coagulation factor C homolog                                   | 13           | 6795033       | 4                    | 4                     | 4.46E-05           | 6.73E-05           | 0.000295           | 3.69E-05           | 0.38176               | 0.882229              | 8.98E-07                 | 0.0048621                |
| <b>Satb1</b>         | special AT-rich sequence binding protein 1                     | 11           | 6855981       | 4                    | 4                     | 0.00046            | 5.10E-05           | 0.000279           | 2.18E-05           | 0.997319              | 0.776257              | 0.001173                 | 0.0514125                |
| <b>Adam33</b>        | a disintegrin and metallopeptidase domain 33                   | 26           | 6890980       | 4                    | 4                     | 0.00052            | 1.84E-08           | 0.00087            | 8.33E-05           | 0.999976              | 0.485605              | 0.187924                 | 0.659598                 |
| <b>Col16a1</b>       | procollagen, type XVI, alpha 1                                 | 50           | 6917365       | 4                    | 4                     | 0.00042            | 1.77E-05           | 5.14E-05           | 5.02E-06           | 0.998109              | 0.997894              | 0.380785                 | 0.971232                 |
| <b>Pla2g4e</b>       | phospholipase A2, group IVE                                    | 21           | 6890290       | 4                    | 4                     | 5.15E-07           | 0.000255           | 0.000283           | 0.000122           | 0.930915              | 0.95658               | 0.857535                 | 0.112063                 |
| <b>Evl</b>           | Ena-vasodilator stimulated phosphoprotein                      | 16           | 6797917       | 4                    | 3                     | 0.02451            | 7.58E-06           | 8.76E-06           | 1.09E-07           | 0.99999               | 0.84087               | 0.01164                  | 0.997472                 |
| <b>Ttc26</b>         | tetratricopeptide repeat domain 26                             | 21           | 6945550       | 4                    | 3                     | 8.26E-05           | 0.000318           | 5.47E-06           | 0.026613           | 0.9057                | 0.995678              | 0.026539                 | 0.882796                 |
| <b>Bcl7a</b>         | B-cell CLL/lymphoma 7A                                         | 16           | 6934226       | 4                    | 3                     | 0.00914            | 0.00061            | 1.71E-06           | 7.62E-07           | 0.990514              | 0.995458              | 0.069755                 | 0.932057                 |
| <b>Pdcd11</b>        | programmed cell death protein 11                               | 44           | 6870130       | 4                    | 3                     | 1.08E-05           | 0.000704           | 4.36E-07           | 0.018202           | 0.880127              | 0.84953               | 0.110201                 | 0.997336                 |
| <b>Tchp</b>          | trichoplein, keratin filament binding                          | 15           | 6933613       | 4                    | 3                     | 0.0001             | 0.000278           | 0.022294           | 1.31E-07           | 0.87233               | 0.999661              | 0.174392                 | 0.847046                 |
| <b>Fgb</b>           | fibrinogen, B beta polypeptide                                 | 12           | 6906386       | 4                    | 3                     | 3.14E-05           | 0.004115           | 2.66E-06           | 1.23E-07           | 0.999072              | 0.293546              | 0.812086                 | 0.0944539                |
| <b>Plce1</b>         | phospholipase C, epsilon 1                                     | 43           | 6869570       | 4                    | 3                     | 0.00097            | 1.12E-05           | 9.20E-05           | 0.011306           | 0.999779              | 0.994721              | 0.954537                 | 0.0003911                |
| <b>Cacna1b</b>       | calcium channel, voltage-dependent, N type, alpha 1B sub       | 51           | 6885345       | 4                    | 2                     | 0.03412            | 5.60E-05           | 0.001715           | 3.84E-09           | 0.999988              | 0.999994              | 0.035463                 | 0.0031955                |
| <b>Rhbdd3</b>        | rhomboid domain containing 3                                   | 14           | 6778432       | 4                    | 2                     | 0.03503            | 2.83E-05           | 0.003285           | 6.39E-06           | 0.902392              | 0.887371              | 0.060173                 | 0.22381                  |
| <b>Txnrd3</b>        | thioredoxin reductase 3                                        | 23           | 6947894       | 4                    | 2                     | 0.02002            | 4.80E-09           | 0.037229           | 5.50E-06           | 0.801513              | 0.989678              | 0.119097                 | 0.740731                 |
| <b>Otud7a</b>        | OTU domain containing 7A                                       | 23           | 6961049       | 4                    | 2                     | 0.00037            | 0.025129           | 0.000322           | 0.004862           | 0.906636              | 0.717403              | 0.131647                 | 0.955086                 |
| <b>Hydin</b>         | hydrocephalus inducing                                         | 101          | 6979096       | 4                    | 2                     | 0.01877            | 0.000177           | 0.036053           | 8.21E-07           | 0.999999              | 0.997499              | 0.161698                 | 0.305037                 |
| <b>Heatr6</b>        | HEAT repeat containing 6, cDNA 2700008B19Rik                   | 25           | 6873045       | 4                    | 2                     | 0.00479            | 1.59E-07           | 0.02108            | 0.000172           | 0.99996               | 0.687526              | 0.177058                 | 0.424668                 |
| <b>Fras1</b>         | Fraser syndrome 1 homolog (human)                              | 80           | 6932601       | 4                    | 2                     | 0.00399            | 2.71E-05           | 0.016222           | 0.000458           | 1                     | 0.997925              | 0.181219                 | 0.171349                 |
| <b>Abca4</b>         | ATP-binding cassette, sub-family A (ABC1), member 4            | 59           | 6900982       | 4                    | 2                     | 0.00841            | 0.003197           | 8.66E-05           | 0.000799           | 0.999808              | 0.999723              | 0.198347                 | 0.663792                 |
| <b>Lama1</b>         | laminin alpha 1                                                | 73           | 6851848       | 4                    | 2                     | 0.00035            | 0.002056           | 0.026727           | 1.30E-06           | 0.999877              | 0.984322              | 0.258986                 | 0.229054                 |
| <b>BC025575</b>      | unknown, cDNA BC025575                                         | 15           | 6791569       | 4                    | 2                     | 0.00094            | 0.001147           | 0.022877           | 3.42E-05           | 0.813427              | 0.278902              | 0.336114                 | 0.221047                 |
| <b>Ptprg</b>         | protein tyrosine phosphatase receptor type G                   | 36           | 6816951       | 4                    | 2                     | 0.01845            | 0.00014            | 0.00014            | 0.003224           | 0.998949              | 1                     | 0.417795                 | 0.0011789                |
| <b>Abca8a</b>        | ATP-binding cassette, sub-family A (ABC1) member 8a            | 39           | 6792114       | 4                    | 2                     | 0.001              | 0.029078           | 0.010504           | 1.35E-07           | 0.999942              | 0.610321              | 0.451863                 | 0.990562                 |
| <b>Uvrag</b>         | UV radiation resistance associated gene                        | 19           | 6969690       | 4                    | 2                     | 0.00817            | 0.000438           | 0.000229           | 0.029848           | 0.933951              | 0.805425              | 0.453869                 | 0.246073                 |
| <b>Cnksr2</b>        | connector enhancer of kinase suppressor of Ras 2               | 25           | 7020425       | 4                    | 2                     | 0.00042            | 0.004937           | 0.001809           | 4.08E-09           | 0.052771              | 0.483997              | 0.616792                 | 0.991069                 |
| <b>Itgb4</b>         | integrin beta 4                                                | 41           | 6785183       | 4                    | 2                     | 0.00055            | 0.006062           | 0.004291           | 8.72E-05           | 0.961729              | 0.990076              | 0.739942                 | 0.942278                 |
| <b>Kih11</b>         | kelch-like 11                                                  | 6            | 6791427       | 4                    | 2                     | 8.64E-05           | 0.018402           | 2.26E-05           | 0.029778           | 0.502179              | 0.368681              | 0.925406                 | 0.954212                 |
| <b>Dmgdh</b>         | dimethylglycine dehydrogenase precursor                        | 19           | 6809022       | 4                    | 2                     | 1.30E-06           | 0.022918           | 0.017235           | 0.000254           | 0.841052              | 0.925352              | 0.978268                 | 0.258026                 |
| <b>Ttpa</b>          | tocopherol (alpha) transfer protein                            | 13           | 6912040       | 4                    | 2                     | 0.00054            | 0.000114           | 0.025288           | 0.001478           | 0.336247              | 0.745782              | 0.985509                 | 0.992006                 |
| <b>Fgf8</b>          | fibroblast growth factor 8                                     | 8            | 6873363       | 4                    | 2                     | 0.00118            | 0.000878           | 0.010628           | 0.000817           | 0.474431              | 0.600826              | 0.995704                 | 0.554256                 |
| <b>Vill</b>          | villin-like                                                    | 23           | 6992866       | 4                    | 1                     | 0.00458            | 0.00014            | 0.027079           | 0.028022           | 0.997946              | 0.984554              | 6.47E-06                 | 4.31E-05                 |
| <b>Hcn1</b>          | hyperpolarization-activated, cyclic nucleotide-gated K+ 1      | 14           | 6810563       | 4                    | 1                     | 0.02225            | 8.69E-07           | 0.027549           | 0.001808           | 0.460408              | 0.967329              | 0.005775                 | 0.704039                 |
| <b>Evc2</b>          | Ellis van Creveld syndrome 2 homolog, sim to reproductive hom  | 21           | 6930023       | 4                    | 1                     | 0.00607            | 0.000397           | 0.044179           | 0.020977           | 0.99573               | 0.989122              | 0.041486                 | 0.568218                 |
| <b>Tgfa</b>          | transforming growth factor alpha                               | 8            | 6947596       | 4                    | 1                     | 0.00462            | 0.019451           | 0.000729           | 0.004116           | 0.952421              | 0.993197              | 0.070742                 | 0.309718                 |
| <b>Col4a1</b>        | procollagen, type IV, alpha 1                                  | 50           | 6980364       | 4                    | 1                     | 7.14E-06           | 0.028994           | 0.007242           | 0.007377           | 0.940386              | 0.999949              | 0.073734                 | 0.92711                  |
| <b>Gldn</b>          | gliomedin                                                      | 12           | 6989195       | 4                    | 1                     | 0.00077            | 0.025964           | 0.011502           | 0.021624           | 0.849549              | 0.507773              | 0.080347                 | 0.369239                 |
| <b>Galnt5</b>        | UDP-N-acetyl-alpha-D-galactosamine:polypeptide N-acetylga      | 14           | 6877356       | 4                    | 1                     | 0.00492            | 0.021661           | 0.000833           | 0.003911           | 0.764995              | 0.106831              | 0.094669                 | 0.0032335                |
| <b>Bruno6</b>        | bruno-like 6, RNA binding protein                              | 13           | 6989554       | 4                    | 1                     | 0.03677            | 0.018444           | 0.030173           | 0.000206           | 0.990822              | 0.950369              | 0.197385                 | 0.645284                 |
| <b>Mall</b>          | mal, T-cell differentiation protein-like                       | 7            | 6890712       | 4                    | 1                     | 0.01888            | 0.017812           | 0.017758           | 1.45E-06           | 0.883629              | 0.670205              | 0.200693                 | 0.190117                 |
| <b>Itga6</b>         | integrin alpha 6                                               | 25           | 6878031       | 3                    | 3                     | 1.23E-09           | 4.49E-11           | 0.05897            | 6.98E-05           | 0.999015              | 0.815633              | 4.93E-20                 | 0.82559                  |
| <b>Adamts14</b>      | ADAMTS-like 4                                                  | 26           | 6907202       | 3                    | 3                     | 0.00098            | 1.86E-06           | 0.313182           | 1.58E-05           | 0.724192              | 0.79873               | 0.010361                 | 0.0916315                |
| <b>Smarca4</b>       | SWI/SNF related matrix associated actin dependent regulator of | 34           | 6987396       | 3                    | 3                     | 1.19E-06           | 0.000281           | 0.07361            | 0.000142           | 0.999017              | 0.999994              | 0.027492                 | 0.761547                 |
| <b>Notch4</b>        | Notch4, LOC674800                                              | 42           | 6850025       | 3                    | 3                     | 0.00042            | 1.28E-06           | 0.217374           | 0.000328           | 0.998328              | 0.999082              | 0.033234                 | 0.0046917                |
| <b>Gucy2e</b>        | guanylate cyclase 2e                                           | 20           | 6789269       | 3                    | 3                     | 0.87107            | 4.54E-05           | 0.000746           | 0.000615           | 0.941905              | 0.18046               | 0.852533                 | 0.0006216                |
| <b>Sept8</b>         | septin 8                                                       | 14           | 6780983       | 3                    | 2                     | 0.08131            | 0.001559           | 0.000122           | 1.04E-07           | 0.731703              | 0.765659              | 9.75E-12                 | 0.251945                 |
| <b>Ptprv</b>         | protein tyrosine phosphatase, receptor type, V                 | 42           | 6762395       | 3                    | 2                     | 0.00318            | 0.00032            | 0.125057           | 5.72E-05           | 0.574698              | 0.983431              | 3.71E-09                 | 0.805486                 |
| <b>Aff4</b>          | AF4/FMR2 family member 4                                       | 24           | 6780963       | 3                    | 2                     | 3.78E-05           | 1.05E-06           | 0.067882           | 0.004936           | 0.988461              | 0.747193              | 0.000588                 | 0.604988                 |
| <b>Asx12</b>         | additional sex combs like 2, polycomb group protein            | 17           | 6792935       | 3                    | 2                     | 0.00027            | 2.73E-06           | 0.111457           | 0.009564           | 0.980718              | 0.987215              | 0.000706                 | 0.903749                 |
| <b>Ryr1</b>          | ryanodine receptor 1, skeletal muscle                          | 104          | 6966183       | 3                    | 1                     | 0.02471            | 1.16E-05           | 0.710008           | 0.004171           | 0.999665              | 0.999976              | 6.59E-44                 | 1.00E-33                 |
| <b>Rhbd1</b>         | rhomboid, veinlet-like 1                                       | 20           | 6854447       | 3                    | 1                     | 0.37629            | 0.000471           | 0.043908           | 0.033522           | 0.999341              | 0.999992              | 3.21E-05                 | 0.862986                 |
| <b>Grhl2</b>         | grainyhead-like 2                                              | 19           | 6829871       | 3                    | 1                     | 0.02357            | 0.340328           | 1.72E-05           | 0.018335           | 0.683245              | 0.97185               | 0.000214                 | 0.0007302                |
| <b>Arhgef10</b>      | Rho guanine nucleotide exchange factor (GEF) 10                | 31           | 6974254       | 3                    | 0                     | 0.0304             | 0.3885             | 0.657              | 0.0469             | 0.0487                | 0.371327              | 6.78E-14                 | 0.022115                 |
| <b>Aspm</b>          | asp (abnormal spindle)-like microcephaly associated            | 36           | 6753592       | 2                    | 2                     | 0.1429             | ###                | 0.1104             | 0.0002             | 1                     | 0.77895               | 9.66E-14                 | 4.87E-13                 |
| <b>Fads3</b>         | fatty acid desaturase 3                                        | 18           | 6868018       | 2                    | 2                     | 0.367              | 0.0002             | 0.2809             | ###                | 0.8155                | 0.730998              | 8.51E-06                 | 0.510816                 |
| <b>Slc6a13</b>       | solute carrier family 6 (neurotransmitter transporter, GABA)   | 17           | 6949591       | 2                    | 2                     | 0.66326            | 0.000319           | 0.405947           | 5.49E-05           | 0.767896              | 0.98972               | 2.17E-05                 | 0.0090303                |

| Gene Symbol          | Gene Description                                                 | # Probe Sets | Transcript ID | No cell types p<0.05 | No cell types p<0.001 | p value wt v thymus memory CD4 | P value wt vs thymus naive CD4 | p value wt vs thymus memory CD8 | p value wt vs thymus naive CD8 | p value wt vs thymus CD8SP | p value wt vs thymus CD4SP | P-value WT naive v WT memory CD4 | P-value WT naive v WT memory CD8 |
|----------------------|------------------------------------------------------------------|--------------|---------------|----------------------|-----------------------|--------------------------------|--------------------------------|---------------------------------|--------------------------------|----------------------------|----------------------------|----------------------------------|----------------------------------|
| <i>Thada</i>         | thyroid adenoma associated                                       | 16           | 6857799       | 6                    | 5                     | 2.74E-12                       | 1.80E-20                       | 1.99E-13                        | 2.88E-07                       | 0.031018                   | 9.71E-06                   | 0.000108                         | 0.396876                         |
| <i>Gtf2a1</i>        | general transcription factor Ila precursor                       | 6            | 6802744       | 6                    | 3                     | 0.000139                       | 2.01E-07                       | 0.000735                        | 0.001687                       | 0.024167                   | 0.002873                   | 0.424674                         | 0.0856947                        |
| <i>Wdtdc1</i>        | WD and tetratricopeptide repeats 1                               | 17           | 6925885       | 5                    | 3                     | 0.00251                        | 6.59E-06                       | 9.97E-06                        | 0.000148                       | 0.964049                   | 0.0134                     | 0.228673                         | 0.372625                         |
| <i>Hyi</i>           | hydroxypyruvate isomerase homolog                                | 7            | 6916705       | 5                    | 1                     | 0.018832                       | 0.000135                       | 0.002988                        | 0.006195                       | 0.241555                   | 0.024535                   | 0.050161                         | 0.332321                         |
| <i>Col6a3</i>        | alpha 3 type VI collagen isoform 1 precursor                     | 33           | 6760642       | 4                    | 4                     | 0.000637                       | 7.45E-07                       | 5.95E-07                        | 4.70E-06                       | 0.999974                   | 0.99853                    | 0.08005                          | 0.16909                          |
| <i>Cdc42bpb</i>      | Cdc42 binding protein kinase beta                                | 42           | 6803821       | 4                    | 3                     | 0.002345                       | 1.94E-05                       | 1.22E-10                        | 2.96E-06                       | 0.632693                   | 0.778043                   | 3.80E-12                         | 4.53E-32                         |
| <i>Gemin5</i>        | gem (nuclear organelle) associated protein 5                     | 35           | 6788563       | 4                    | 3                     | 0.328907                       | 0.007471                       | 3.30E-05                        | 0.257472                       | 0.000262                   | 4.73E-05                   | 0.007367                         | 0.997164                         |
| <i>Tgn</i>           | thyroglobulin                                                    | 47           | 6831162       | 4                    | 3                     | 0.010252                       | 0.000225                       | 0.000154                        | 3.61E-07                       | 0.999974                   | 0.819483                   | 0.019818                         | 0.0039451                        |
| <i>Apaf1</i>         | apoptotic peptidase activating factor 1                          | 31           | 6775977       | 4                    | 3                     | 0.000183                       | 0.009543                       | 0.000668                        | 0.000436                       | 0.960658                   | 0.451155                   | 0.633855                         | 0.254134                         |
| <i>Zfp593</i>        | zinc finger protein 593                                          | 5            | 6926011       | 4                    | 2                     | 0.040332                       | 0.000355                       | 9.62E-05                        | 0.012223                       | 0.176683                   | 0.823282                   | 0.006894                         | 0.140325                         |
| <i>Sspo</i>          | SCO-spondin                                                      | 111          | 6946002       | 4                    | 2                     | 0.002922                       | 8.49E-06                       | 0.002457                        | 3.03E-09                       | 0.960717                   | 0.999944                   | 0.027791                         | 0.621996                         |
| <i>Lztr1</i>         | leucine-zipper-like transcriptional regulator 1                  | 22           | 6839746       | 4                    | 2                     | 0.019525                       | 1.04E-08                       | 0.003098                        | 0.000339                       | 0.800564                   | 0.698674                   | 0.051847                         | 0.73952                          |
| <i>Eif2ak3</i>       | eukaryotic translation initiation factor 2 alpha kinase          | 20           | 6946894       | 4                    | 2                     | 0.003643                       | 0.000737                       | 0.147458                        | 0.000737                       | 0.027537                   | 0.4341                     | 0.120515                         | 0.549851                         |
| <i>2700097O09Rik</i> | similar to translocase of outer mitochondrial membrane           | 9            | 6800912       | 4                    | 2                     | 0.004485                       | 0.000363                       | 0.000604                        | 0.00344                        | 0.95469                    | 0.923812                   | 0.238637                         | 0.921178                         |
| <i>Pip5k3</i>        | phosphatidylinositol-3-phosphate phosphatidylinositol 5-kinase 3 | 36           | 6750086       | 4                    | 2                     | 6.59E-06                       | 2.56E-10                       | 0.038541                        | 0.005043                       | 0.977783                   | 0.419111                   | 0.293821                         | 0.816606                         |
| <i>Zfp619</i>        | zinc finger protein 619, cDNA 3000002G13Rik                      | 21           | 6959982       | 4                    | 2                     | 0.03107                        | 0.033634                       | 4.28E-11                        | 4.78E-05                       | 0.904491                   | 0.078013                   | 0.392625                         | 0.616247                         |
| <i>Tsga10</i>        | testis specific 10                                               | 20           | 6757981       | 4                    | 2                     | 9.42E-07                       | 0.031585                       | 0.001538                        | 0.000322                       | 0.999993                   | 0.774362                   | 0.805501                         | 0.389058                         |
| <i>C130038G02Rik</i> | cDNA C130038G02Rik                                               | 10           | 6935630       | 4                    | 2                     | 0.000433                       | 0.130217                       | 0.006991                        | 4.98E-08                       | 0.989332                   | 0.010323                   | 0.982525                         | 0.443985                         |
| <i>Rbbp6</i>         | retinoblastoma binding protein 6                                 | 5            | 6964053       | 4                    | 1                     | 0.01015                        | 1.09E-05                       | 0.014633                        | 0.014496                       | 0.803824                   | 0.923236                   | 0.008043                         | 0.998185                         |
| <i>Dhx16</i>         | DEAH (Asp-Glu-Ala-His) box polypeptide 16                        | 22           | 6850200       | 4                    | 1                     | 0.021933                       | 0.00088                        | 0.026731                        | 0.003585                       | 0.98944                    | 0.979834                   | 0.032356                         | 0.919382                         |
| <i>Gpr98</i>         | G protein coupled receptor 98, LOC672575                         | 109          | 6814656       | 4                    | 1                     | 0.004228                       | 0.010336                       | 0.011774                        | 1.12E-08                       | 0.938951                   | 0.591597                   | 0.034144                         | 0.106507                         |
| <i>6330407J23Rik</i> | cDNA 6330407J23Rik                                               | 14           | 6766862       | 4                    | 1                     | 0.037255                       | 0.035789                       | 0.003704                        | 1.44E-06                       | 0.718736                   | 0.727404                   | 0.054818                         | 0.86556                          |
| <i>Chuk</i>          | conserved helix-loop-helix ubiquitous kinase                     | 22           | 6873249       | 4                    | 1                     | 0.003638                       | 0.000269                       | 0.015138                        | 0.008379                       | 0.985745                   | 0.857927                   | 0.183847                         | 0.962477                         |
| <i>Ppm1e</i>         | protein phosphatase 1E (PP2C domain containing)                  | 17           | 6790547       | 4                    | 0                     | 0.004088                       | 0.003577                       | 0.0131                          | 0.05816                        | 0.016306                   | 0.991338                   | 0.000155                         | 0.506241                         |
| <i>Ugcg</i>          | UDP-glucose ceramide glucosyltransferase                         | 12           | 6913876       | 3                    | 2                     | 1.14E-07                       | 1.07E-06                       | 0.984149                        | 0.441943                       | 0.035818                   | 0.442723                   | 3.56E-08                         | 0.856078                         |
| <i>Nf1</i>           | neurofibromatosis 1                                              | 18           | 6782777       | 3                    | 2                     | 0.000173                       | 0.008598                       | 0.81788                         | 0.00015                        | 0.999496                   | 0.999366                   | 6.66E-08                         | 0.697022                         |
| <i>Stt3b</i>         | STT3, subunit of the oligosaccharyltransferase complex           | 28           | 6999196       | 3                    | 2                     | 4.97E-06                       | 5.40E-08                       | 0.035675                        | 0.395544                       | 0.99966                    | 0.953227                   | 8.78E-05                         | 0.394808                         |
| <i>Vapa</i>          | vesicle-associated membrane protein associated protein A         | 10           | 6856674       | 3                    | 2                     | 0.000704                       | 4.56E-07                       | 0.019151                        | 0.073088                       | 0.886404                   | 0.958838                   | 0.000836                         | 0.223607                         |
| <i>Adcy7</i>         | Adenylate cyclase 7, cDNA 5730445M16Rik                          | 32           | 6977975       | 3                    | 1                     | 0.030736                       | 9.76E-12                       | 0.007086                        | 0.111921                       | 0.999871                   | 0.97381                    | 2.24E-06                         | 0.858573                         |
| <i>Tnks</i>          | tankyrase, TRF1-interacting ankyrin-related ADP-ribose poly      | 29           | 6981664       | 3                    | 1                     | 0.00688                        | 6.79E-11                       | 0.002795                        | 0.100459                       | 0.523076                   | 0.909521                   | 0.000121                         | 0.453867                         |
| <i>Nxf1</i>          | nuclear RNA export factor 1 homolog                              | 20           | 6867957       | 3                    | 1                     | 0.008888                       | 6.20E-15                       | 0.999984                        | 0.997694                       | 0.999976                   | 0.029662                   | 0.000478                         | 0.999953                         |
| <i>Enpp2</i>         | ectonucleotide pyrophosphatase/phosphodiesterase 2               | 28           | 6835759       | 2                    | 2                     | 0.084918                       | 0.000192                       | 0.596624                        | 3.09E-10                       | 0.10694                    | 0.982837                   | 1.02E-08                         | 8.95E-05                         |
| <i>Zfp592</i>        | zinc finger protein 592                                          | 16           | 6962043       | 2                    | 2                     | 0.000136                       | 0.000293                       | 0.050179                        | 0.696043                       | 0.999901                   | 0.994832                   | 1.44E-06                         | 0.711474                         |

Wu Supp Table 5:  
Group D Genes

| Gene Symbol     | Protein name                                                                     | Confirmed alt promoter by transcript dbase? | # Probe Sets | Transcript ID | No cell types p<0.05 | No cell types p<0.001 | p value wt v th CD4 | P value wt vs th naive CD4 | p value wt vs th memory CD8 | p value wt vs th naive CD8 | p value wt vs th thymus CD8SP | p value wt vs th thymus CD4SP | P-value v WT memory CD4 | P-value v WT memory CD8 |
|-----------------|----------------------------------------------------------------------------------|---------------------------------------------|--------------|---------------|----------------------|-----------------------|---------------------|----------------------------|-----------------------------|----------------------------|-------------------------------|-------------------------------|-------------------------|-------------------------|
| <b>Rxfp2</b>    | relaxin/insulin-like family peptide receptor 2                                   |                                             | 20           | 6935732       | 5                    | 3                     | 0.0001876           | 0.0175927                  | 6.30E-10                    | 3.04E-06                   | 0.976794                      | <b>0.012318</b>               | 0.503963                | 0.172189                |
| <b>Cyc1</b>     | cytochrome c-1                                                                   |                                             | 11           | 6831651       | 5                    | 3                     | 2.40E-06            | 7.67E-06                   | 2.98E-05                    | 0.00101392                 | <b>0.0134932</b>              | 0.415121                      | 0.970021                | 0.999567                |
| <b>Polr3f</b>   | polymerase (RNA) III (DNA directed) polypeptide F                                |                                             | 13           | 6881834       | 5                    | 0                     | 0.0308398           | 0.0011177                  | 0.014061                    | 0.0280623                  | 0.834537                      | <b>0.0149122</b>              | 0.41785                 | 0.710731                |
| <b>Csf1r</b>    | colony stimulating factor 1 receptor                                             |                                             | 28           | 6861358       | 4                    | 4                     | 1.22E-05            | 1.73E-08                   | 4.10E-07                    | 4.19E-05                   | 0.998956                      | 0.998607                      | 4.72E-14                | 2.56E-40                |
| <b>Ddx42</b>    | DEAD (Asp-Glu-Ala-Asp) box polypeptide 42                                        |                                             | 19           | 6784605       | 4                    | 4                     | 0.0002757           | 2.63E-07                   | 1.66E-05                    | 4.91E-05                   | 0.819968                      | 0.810998                      | 0.00022393              | 0.234056                |
| <b>Mthfsd</b>   | methylenetetrahydrofolate synthetase domain containing                           | yes                                         | 16           | 6985859       | 4                    | 4                     | 1.14E-06            | 9.03E-05                   | 3.11E-05                    | 7.30E-06                   | 0.996842                      | 0.993185                      | <b>0.0156708</b>        | 0.883064                |
| <b>B3gn17</b>   | UDP-GlcNAc:beta-Gal beta-1,3-N-acetylglucosaminyltransferase 7                   |                                             | 9            | 6751271       | 4                    | 4                     | 0.0003739           | 0.0007317                  | 0.0005443                   | 0.00073231                 | 0.921624                      | 0.966651                      | 0.317943                | 0.802308                |
| <b>Slc25a28</b> | Mitoferrin, solute carrier family 25, member 28                                  | yes                                         | 9            | 6873230       | 4                    | 4                     | 0.0004378           | 7.20E-05                   | 5.08E-05                    | 5.44E-08                   | 0.583722                      | 0.790922                      | 0.476029                | 0.357451                |
| <b>Rapgef4</b>  | Rap guanine nucleotide exchange factor (GEF) 4                                   | yes                                         | 32           | 6878038       | 4                    | 3                     | 1.05E-06            | 2.91E-08                   | 6.86E-07                    | 0.00588248                 | 0.999935                      | 0.851507                      | 5.15E-30                | <b>0.0045142</b>        |
| <b>Gabbr1</b>   | gamma-aminobutyric acid (GABA-C) receptor, subunit rho 1                         | yes                                         | 11           | 6912520       | 4                    | 3                     | 5.97E-05            | 3.83E-05                   | 0.0101164                   | 0.00012187                 | 0.770133                      | 0.888659                      | 2.83E-13                | 0.0908446               |
| <b>Picp3</b>    | phospholipase C, gamma 1                                                         | yes                                         | 38           | 6882880       | 4                    | 3                     | 3.40E-08            | 3.76E-06                   | 0.0066863                   | 0.00022206                 | 0.994722                      | 0.992793                      | 1.88E-06                | 0.562914                |
| <b>Polr3d</b>   | polymerase (RNA) III (DNA directed) polypeptide D                                |                                             | 13           | 6825696       | 4                    | 3                     | 0.0127043           | 0.0002309                  | 0.0004395                   | 0.00064851                 | 0.974835                      | 0.990505                      | 2.18E-05                | 0.425928                |
| <b>Sfrs11</b>   | splicing factor, arginine/serine-rich 11                                         | yes                                         | 13           | 6910948       | 4                    | 3                     | 1.01E-05            | 2.60E-08                   | 1.03E-08                    | 0.00131578                 | 0.956719                      | 0.862144                      | 0.00040848              | 0.873607                |
| <b>Pcdhac1</b>  | protocadherin alpha subfamily C, 1                                               |                                             | 120          | 6860138       | 4                    | 3                     | 0.0037683           | 2.53E-05                   | 0.0003161                   | 2.25E-08                   | 1                             | 0.999598                      | 0.00118589              | 0.423601                |
| <b>Raver2</b>   | ribonucleoprotein, PTB-binding 2                                                 |                                             | 15           | 6915818       | 4                    | 3                     | 2.85E-05            | 0.0002585                  | 0.0356753                   | 2.70E-10                   | 0.658187                      | 0.806031                      | 0.00187054              | 0.220527                |
| <b>Baz1a</b>    | bromodomain adjacent to zinc finger domain 1A                                    |                                             | 12           | 6800906       | 4                    | 3                     | 0.0020681           | 9.79E-06                   | 0.0007142                   | 0.00069192                 | 0.963184                      | 0.667374                      | 0.00613519              | 0.343038                |
|                 | XM_994297 // LOC671134 // similar to melanoma antigen // XM_98171                |                                             | 15           | 6929366       | 4                    | 3                     | 7.00E-06            | 8.55E-07                   | 0.0005184                   | 0.00740371                 | 0.991377                      | 0.491434                      | 0.0111994               | 0.961717                |
| <b>Ccdc41</b>   | 4921537D05Rik                                                                    |                                             | 20           | 6769934       | 4                    | 3                     | 1.19E-06            | 1.83E-07                   | 0.0034376                   | 0.0007082                  | 0.997725                      | 0.856656                      | 0.0133556               | 0.66045                 |
| <b>Ercc5</b>    | excision repair cross-complementing rodent repair deficient                      |                                             | 23           | 6749108       | 4                    | 3                     | 0.0045689           | 5.86E-08                   | 3.36E-05                    | 0.00090151                 | 0.957616                      | 0.0621897                     | 0.070508                | 0.993315                |
| <b>Trpc3</b>    | transient receptor potential cation channel, subfamily C,                        |                                             | 15           | 6904303       | 4                    | 3                     | 0.0006637           | 1.01E-06                   | 0.0219834                   | 0.00044592                 | 0.716438                      | 0.584469                      | 0.134451                | 0.548268                |
|                 | XM_912301 // LOC626061 // similar to SGT1, suppressor of G2 allele of SKP1       |                                             | 11           | 6820573       | 4                    | 3                     | 0.0002042           | 5.22E-05                   | 0.0146618                   | 1.97E-06                   | 0.99977                       | 0.984377                      | 0.136415                | 0.98898                 |
| <b>Uck1l</b>    | uridine-cytidine kinase 1-like 1                                                 |                                             | 18           | 694303        | 4                    | 3                     | 4.38E-06            | 0.0056647                  | 5.36E-05                    | 3.08E-05                   | 0.998187                      | 0.977702                      | 0.14181                 | 0.650657                |
| <b>Dsg2</b>     | LOC640723 desmoglein 2                                                           |                                             | 20           | 6859285       | 4                    | 3                     | 2.67E-08            | 0.0022421                  | 9.96E-07                    | 1.62E-06                   | 0.981682                      | 0.119586                      | 0.155582                | 0.13622                 |
| <b>Gdap2</b>    | ganglioside-induced differentiation-associated-protein 2                         |                                             | 13           | 6899921       | 4                    | 3                     | 1.04E-06            | 0.0009352                  | 0.0060361                   | 0.00066973                 | 0.704882                      | 0.242501                      | 0.348842                | 0.901437                |
|                 | NM_138654 // AF397014 // cDNA sequence AF397014                                  |                                             | 15           | 6811260       | 4                    | 3                     | 0.0005562           | 6.36E-06                   | 0.0151055                   | 2.26E-05                   | 0.471636                      | 0.475204                      | 0.407451                | 0.824375                |
| <b>Phka2</b>    | phosphorylase kinase alpha 2                                                     |                                             | 39           | 7014855       | 4                    | 3                     | 0.0017287           | 7.30E-05                   | 1.55E-06                    | 0.00082221                 | 0.993944                      | 0.960764                      | 0.545825                | <b>0.0159969</b>        |
| <b>Sdccag3</b>  | serologically defined colon cancer antigen 3                                     |                                             | 9            | 6885485       | 4                    | 3                     | 0.0001327           | 0.0121751                  | 0.0001002                   | 6.05E-05                   | 0.828575                      | 0.957572                      | 0.598131                | 0.856909                |
| <b>Col8a2</b>   | procollagen, type VIII, alpha 2                                                  |                                             | 20           | 6917153       | 4                    | 3                     | 0.0001387           | 0.0006588                  | 0.0051641                   | 0.00093243                 | 0.78761                       | 0.98962                       | 0.696427                | 0.900618                |
|                 | NM_181278 // B230219D22Rik                                                       |                                             | 10           | 6807263       | 4                    | 3                     | 4.51E-06            | 0.0023015                  | 0.0003045                   | 1.02E-05                   | 0.950613                      | 0.120176                      | 0.798172                | 0.739866                |
|                 | XM_975887 // D4Etd196e // DNA segment, Chr 4, ERATO Doi 196, expressed           |                                             | 9            | 6925880       | 4                    | 3                     | 1.82E-05            | 0.0009389                  | 0.0054725                   | 7.52E-07                   | 0.868466                      | 0.248111                      | 0.8174                  | 0.224956                |
| <b>Hint1</b>    | histidine triad nucleotide binding protein 1                                     |                                             | 5            | 6781083       | 4                    | 3                     | 0.0009562           | 0.0001943                  | 0.0401752                   | 0.00010327                 | 0.79189                       | 0.719453                      | 0.918734                | 0.802668                |
| <b>Als2cl</b>   | ALS2 C-terminal like                                                             |                                             | 27           | 6992475       | 4                    | 2                     | 8.95E-11            | 1.78E-08                   | 0.0064204                   | 0.00774164                 | 0.999891                      | 0.994688                      | 9.24E-21                | <b>0.0031278</b>        |
| <b>Rymb</b>     | RGM domain family, member B                                                      |                                             | 10           | 6853960       | 4                    | 2                     | 0.0313629           | 4.50E-07                   | 0.0043692                   | 3.90E-05                   | 0.936921                      | 0.83838                       | 8.02E-08                | 0.840093                |
| <b>Gns</b>      | glucosamine (N-acetyl)-6-sulfatase                                               | yes                                         | 20           | 6771224       | 4                    | 2                     | 0.0051511           | 1.39E-05                   | 0.0050028                   | 3.87E-06                   | 0.787379                      | 0.486948                      | 1.92E-07                | <b>9.51E-09</b>         |
| <b>Galn2</b>    | UDP-N-acetyl-alpha-D-galactosamine:polypeptide N-acetylgl                        |                                             | 19           | 6979772       | 4                    | 2                     | 0.0060867           | 0.0003345                  | 0.0004923                   | 0.00437458                 | 0.999448                      | 0.994643                      | 2.25E-07                | 0.907301                |
| <b>Mcp1l</b>    | microcephaly, primary autosomal recessive 1                                      |                                             | 22           | 6974480       | 4                    | 2                     | 1.86E-07            | 6.81E-07                   | 0.0013538                   | 0.0083987                  | 0.996643                      | 0.998361                      | 0.00068492              | 0.875964                |
| <b>Metap1l</b>  | methionine aminopeptidase-like 1                                                 |                                             | 11           | 6878016       | 4                    | 2                     | 0.003966            | 7.78E-05                   | 0.0073619                   | 1.24E-05                   | 0.996054                      | 0.607996                      | 0.0267787               | 0.964285                |
| <b>Metrn</b>    | metornin, glial cell differentiation regulator                                   | yes                                         | 6            | 6854438       | 4                    | 2                     | 0.0105823           | 0.0008754                  | 0.0461535                   | 6.93E-05                   | 0.844835                      | 0.895902                      | 0.0314022               | 0.364898                |
| <b>Pabpn1</b>   | poly(A) binding protein, nuclear 1                                               |                                             | 8            | 6819200       | 4                    | 2                     | 8.12E-05            | 0.0007419                  | 0.0274772                   | 0.0183231                  | 0.994086                      | 0.931362                      | 0.0745585               | 0.864122                |
|                 | NM_019836 // 2610024G14Rik                                                       |                                             | 10           | 6939353       | 4                    | 2                     | 0.0377564           | 0.0002675                  | 0.0002514                   | 0.0106942                  | 0.99054                       | 0.52889                       | 0.100119                | 0.917167                |
| <b>Rab34</b>    | RAB34, member of RAS oncogene family                                             |                                             | 16           | 6782680       | 4                    | 2                     | 0.0005791           | 0.0010054                  | 0.0024256                   | 0.00010187                 | 0.99935                       | 0.973618                      | 0.213101                | 0.753626                |
| <b>Epb4.115</b> | erythrocyte protein band 4.1-like 5                                              | yes                                         | 28           | 6761675       | 4                    | 2                     | 0.0006306           | 0.0102827                  | 0.04819                     | 1.61E-06                   | 0.15906                       | 0.808541                      | 0.278742                | 0.48428                 |
| <b>Pycr1</b>    | pyrroline-5-carboxylate reductase-like                                           |                                             | 9            | 6836782       | 4                    | 2                     | 0.044896            | 0.0004196                  | 0.0267182                   | 6.51E-05                   | 0.997682                      | 0.813127                      | 0.29277                 | 0.455301                |
| <b>Cecr5</b>    | cat eye syndrome chromosome region, candidate 5 homolog                          |                                             | 9            | 6956965       | 4                    | 2                     | 1.38E-08            | 0.00786                    | 0.0181941                   | 0.00013287                 | 0.388461                      | 0.930669                      | 0.38108                 | 0.926588                |
| <b>Dhx35</b>    | DEAH (Asp-Glu-Ala-His) box polypeptide 35                                        |                                             | 26           | 6882775       | 4                    | 2                     | 0.0017253           | 1.45E-07                   | 0.0031002                   | 9.42E-05                   | 0.94974                       | 0.971585                      | 0.531181                | 0.715982                |
| <b>Ctbp1</b>    | C-terminal binding protein 1                                                     |                                             | 12           | 6937228       | 4                    | 2                     | 4.76E-05            | 0.0216973                  | 0.0061325                   | 0.00018874                 | 0.980415                      | 0.959718                      | 0.610921                | 0.924623                |
| <b>Gbas</b>     | glioblastoma amplified sequence                                                  |                                             | 15           | 6934634       | 4                    | 2                     | 0.0003989           | 0.0029814                  | 6.26E-05                    | 0.00172896                 | 0.922763                      | 0.993106                      | 0.800142                | 0.892479                |
| <b>Ppp3ca</b>   | protein phosphatase 3, catalytic subunit, alpha isoform                          |                                             | 14           | 6901657       | 4                    | 2                     | 0.0008701           | 0.00047                    | 0.0060752                   | 0.0208899                  | 0.990273                      | 0.987578                      | 0.807642                | 0.672586                |
| <b>Yeats4</b>   | YEATS domain containing 4                                                        |                                             | 11           | 6777305       | 4                    | 2                     | 0.0304279           | 4.00E-05                   | 2.21E-05                    | 0.00777506                 | 0.069241                      | 0.464103                      | 0.920013                | 0.883919                |
|                 | XM_912548 // LOC636969 // similar to isoleucine-tRNA synthetase 2, mitochondrial |                                             | 29           | 6764854       | 4                    | 1                     | 0.0067455           | 2.11E-10                   | 0.0103932                   | 0.021326                   | 0.984232                      | 0.551871                      | 0.00182041              | 0.964557                |
| <b>Ube2q</b>    | ubiquitin-conjugating enzyme E2Q                                                 | yes                                         | 16           | 6899268       | 4                    | 1                     | 0.0048442           | 0.0011766                  | 0.0075415                   | 7.78E-05                   | 0.96423                       | 0.74167                       | 0.00361281              | 0.988456                |
| <b>Aftph</b>    | aftphilin                                                                        |                                             | 14           | 6786504       | 4                    | 1                     | 0.0226456           | 2.21E-06                   | 0.0040058                   | 0.0432138                  | 0.990803                      | 0.298187                      | 0.00699185              | 0.748002                |
|                 | NM_178115 // 2700050L05Rik                                                       |                                             | 30           | 6964730       | 4                    | 1                     | 0.0329994           | 6.92E-05                   | 0.0037104                   | 0.0396391                  | 0.961581                      | 0.941164                      | 0.00980534              | 0.896795                |
|                 | XM_990825 // D5Ert615e                                                           |                                             | 9            | 6937867       | 4                    | 1                     | 0.0071772           | 5.01E-06                   | 0.0089517                   | 0.0395924                  | 0.86879                       | 0.659747                      | 0.0217957               | 0.818083                |
| <b>Acads</b>    | acyl-Coenzyme A dehydrogenase, short chain                                       |                                             | 12           | 6941249       | 4                    | 1                     | 0.0358481           | 0.0002104                  | 0.0086474                   | 0.00447091                 | 0.766612                      | 0.940242                      | 0.0404615               | 0.644627                |
| <b>Pcdh21</b>   | protocadherin 21                                                                 |                                             | 19           | 6824004       | 4                    | 1                     | 0.0250167           | 0.0009928                  | 0.0435933                   | 0.0166968                  | 0.987906                      | 0.994756                      | 0.055238                | 0.546052                |
| <b>Nnp1</b>     | novel nuclear protein 1                                                          |                                             | 16           | 6775257       | 4                    | 1                     | 0.0289576           | 2.81E-05                   | 0.0338675                   | 0.0317165                  | 0.973807                      | 0.980083                      | 0.0799901               | 0.17599                 |
|                 | NM_178778 // A93004102Rik                                                        |                                             | 18           | 6886203       | 4                    | 1                     | 4.35E-07            | 0.0013063                  | 0.0242268                   | 0.0240633                  | 0.999765                      | 0.823036                      | 0.114017                | 0.870373                |
| <b>Tie6</b>     | LOC382645 // transducin-like enhancer protein 6                                  | yes                                         | 18           | 6775478       | 4                    | 1                     | 0.0099313           | 0.0018994                  | 0.0059514                   | 0.0009422                  | 0.957418                      | 0.837404                      | 0.124348                | 0.467535                |
| <b>Atrn</b>     | attractin                                                                        |                                             | 32           | 6881231       | 4                    | 1                     | 0.0003662           | 0.0025046                  | 0.0115452                   | 0.00146076                 | 0.999852                      | 0.809604                      | 0.130495                | 0.599825                |
| <b>Cald1</b>    | caldesmon 1                                                                      |                                             | 12           | 6945335       | 4                    | 1                     | 0.0012246           | 3.49E-06                   | 0.0220124                   | 0.00617109                 | 0.912485                      | 0.830389                      | 0.138803                | 0.589023                |
|                 | XM_982175 // LOC666185                                                           |                                             | 14           | 6929407       | 4                    | 1                     | 1.24E-05            | 0.0024435                  | 0.0151472                   | 0.0189562                  | 0.956636                      | 0.908618                      | 0.148673                | 0.0515091               |
| <b>Slc16a13</b> | solute carrier family 16 (monocarboxylic acid transport                          |                                             | 8            | 6789395       | 4                    | 1                     | 0.0264394           |                            |                             |                            |                               |                               |                         |                         |

| Gene Description                                                       | # Probe Sets | Transcript ID | No cell types p<0.05 | No cell types p<0.001 | P value              |                     | p value               |                  | p value wt vs th | p value wt vs th | p value wt vs th | P-value WT naïve v WT memory | P-value WT naïve v WT memory |
|------------------------------------------------------------------------|--------------|---------------|----------------------|-----------------------|----------------------|---------------------|-----------------------|------------------|------------------|------------------|------------------|------------------------------|------------------------------|
|                                                                        |              |               |                      |                       | p value wt v thu CD4 | wt vs thu naïve CD4 | p value wt vs thu CD8 | p value wt vs th |                  |                  |                  |                              |                              |
| NM_020258 // Slc37a2 // soluble carrier family 37 (glycerol-3-phosph   | 21           | 6994678       | 4                    | 3                     | 5.80E-05             | 2.35E-06            | 8.41E-10              | 0.0014634        | 0.78845          | 0.139502         | 1.40E-07         | 7.79E-10                     |                              |
| NM_027432 // Wdr77 // WD repeat domain 77 // 3 F2.2 // 70465 // 12     | 12           | 6900237       | 4                    | 3                     | 0.001887             | 0.0007489           | 0.0008583             | 7.65E-08         | 0.521317         | 0.488372         | 0.0049533        | 0.149482                     |                              |
| NM_011131 // Pold1 // polymerase (DNA directed), delta 1, catalytic    | 30           | 6966875       | 4                    | 3                     | 2.38E-05             | 0.0459173           | 1.31E-08              | 5.29E-06         | 0.606914         | 0.875409         | 0.0881439        | 0.99658                      |                              |
| AK171818 // Dalrd3 // DALR anticodon binding domain containing 3       | 15           | 6992350       | 4                    | 3                     | 0.0069003            | 8.49E-05            | 1.32E-09              | 2.31E-05         | 0.997368         | 0.999753         | 0.135712         | 0.773668                     |                              |
| XM_983775 // Pde8a // phosphodiesterase 8A // 7 D3 // 18584 // NM      | 25           | 6962054       | 4                    | 3                     | 0.002718             | 7.63E-12            | 4.15E-06              | 3.35E-16         | 0.99185          | 0.845566         | 0.149993         | 0.137729                     |                              |
| XM_001004675 // LOC668110 // region containing MON1 homolog 1          | 11           | 6979269       | 4                    | 3                     | 2.89E-05             | 0.0003374           | 0.009316              | 0.000138         | 0.56866          | 0.998366         | 0.204611         | 0.664106                     |                              |
| NM_198619 // MGC67181 // zinc finger-like protein // 4 E2 // 242747    | 28           | 7011014       | 4                    | 3                     | 0.0002585            | 1.07E-06            | 0.002071              | 1.88E-10         | 0.998975         | 0.931176         | 0.234584         | 0.447653                     |                              |
| NM_010788 // Mecp2 // methyl CpG binding protein 2 // X A7.3X 29       | 24           | 7017609       | 4                    | 3                     | 0.000869             | 4.40E-09            | 0.0116912             | 3.29E-05         | 1                | 0.975643         | 0.517057         | 0.82235                      |                              |
| NM_024275 // Map4k5 // mitogen-activated protein kinase kinase kii     | 35           | 6801493       | 4                    | 3                     | 2.95E-06             | 0.0001163           | 0.000314              | 0.0049671        | 0.745386         | 0.926058         | 0.784085         | 7.70E-06                     |                              |
| NM_146211 // Glt25d1 // glycosyltransferase 25 domain containing       | 16           | 6977093       | 4                    | 3                     | 0.0056956            | 1.15E-06            | 6.48E-05              | 6.86E-09         | 0.867205         | 0.736075         | 0.986169         | 0.949855                     |                              |
| NM_007708 // Cit // citron // 5 F // 12704 // AK047757 // C030025P1    | 50           | 6933697       | 4                    | 2                     | 0.0138462            | 5.43E-08            | 0.0254447             | 1.12E-07         | 0.999615         | 0.998915         | 4.43E-28         | 4.34E-13                     |                              |
| NM_010071 // Dok2 // docking protein 2 // 14 D2-D3 14 39.0 cM // 1     | 11           | 6820113       | 4                    | 2                     | 0.0004076            | 0.0006989           | 0.0162168             | 0.0094636        | 0.92603          | 0.5397           | 1.13E-11         | 0.0001568                    |                              |
| NM_133721 // Itga9 // integrin alpha 9 // 9 F3 9 67.0 cM // 104099     | 28           | 6992855       | 4                    | 2                     | 0.001191             | 0.0045358           | 0.0003231             | 0.0001679        | 0.514082         | 0.898803         | 1.53E-08         | 9.50E-08                     |                              |
| NM_177034 // Apba1 // amyloid beta (A4) precursor protein binding,     | 12           | 6868728       | 4                    | 2                     | 0.0018924            | 0.0314338           | 0.0004241             | 0.000463         | 0.87496          | 0.64571          | 0.0001982        | 0.0036286                    |                              |
| NM_010091 // Dvl1 // dishevelled, dsh homolog 1 (Drosophila) // 4      | E 19         | 6919191       | 4                    | 2                     | 0.0206097            | 0.0404153           | 3.29E-07              | 4.17E-07         | 0.991568         | 0.810865         | 0.0012298        | 0.791104                     |                              |
| NM_011741 // Zan // zonadhesin // 5 G2 5 78.0 cM // 22635 // AK15      | 93           | 6942550       | 4                    | 2                     | 0.0294309            | 7.15E-05            | 0.0042885             | 1.83E-06         | 0.999555         | 0.985493         | 0.0065626        | 0.0603288                    |                              |
| NM_011929 // Clcn6 // chloride channel 6 // // 26372 // AK220319       | 1,21         | 6926864       | 4                    | 2                     | 0.0176975            | 1.43E-07            | 0.0013601             | 4.37E-05         | 0.734862         | 0.999989         | 0.0097403        | 0.017672                     |                              |
| NM_177137 // Gnal // guanine nucleotide binding protein, alpha stir    | 18           | 6861688       | 4                    | 2                     | 0.0037998            | 0.0025926           | 0.000359              | 3.05E-07         | 0.243299         | 0.897172         | 0.0099961        | 0.525469                     |                              |
| NM_019689 // Arid3b // AT rich interactive domain 3B (Bright like)     | 18           | 6995938       | 4                    | 2                     | 0.0019189            | 5.02E-07            | 0.0373534             | 2.38E-05         | 0.994611         | 0.943201         | 0.0261903        | 0.971649                     |                              |
| NM_001025365 // D4Wsu114e // DNA segment, Chr 4, Wayne State           | 17           | 6926851       | 4                    | 2                     | 0.0687375            | 0.0003094           | 0.0203408             | 0.0002032        | 0.960609         | 0.015469         | 0.0299223        | 0.0414677                    |                              |
| XM_992707 // LOC545194 // hypothetical LOC545194 // 17 B1 // 54        | 32           | 6854868       | 4                    | 2                     | 0.0005956            | 0.0369169           | 1.78E-05              | 0.0016723        | 0.999389         | 0.995876         | 0.121257         | 0.673717                     |                              |
| XM_986470 // LOC675982 // similar to Meiotic recombination protein     | 13           | 6883640       | 4                    | 2                     | 0.0345598            | 0.0028129           | 0.0001856             | 0.00015          | 0.93955          | 0.953032         | 0.151038         | 0.490712                     |                              |
| NM_010255 // Gamt // guanidinoacetate methyltransferase // 10 C1       | 8            | 6775355       | 4                    | 2                     | 0.0488341            | 0.0065428           | 6.12E-06              | 0.000327         | 0.909526         | 0.777417         | 0.18449          | 0.233957                     |                              |
| NM_010765 // Mapkapk5 // MAP kinase-activated protein kinase 5 //      | 8            | 6941681       | 4                    | 2                     | 0.0127348            | 2.90E-05            | 0.0221248             | 0.0004145        | 0.697439         | 0.787898         | 0.20777          | 0.67675                      |                              |
| NM_027898 // Gramd1a // GRAM domain containing 1A // 7 B1 7 13         | 17           | 6966358       | 4                    | 2                     | 0.0183432            | 0.0092926           | 4.71E-09              | 0.0002896        | 0.973267         | 0.997871         | 0.431197         | 0.709427                     |                              |
| AK004948 // D1Erd161e // DNA segment, Chr 1, ERATO Doi 161, €          | 7            | 6750600       | 4                    | 2                     | 0.0081315            | 0.0007745           | 0.0001079             | 0.0036826        | 0.24429          | 0.468454         | 0.505626         | 0.111451                     |                              |
| NM_001001180 // BC066028 // cDNA sequence BC066028 // 7 F5 //          | 10           | 6978892       | 4                    | 2                     | 0.0055394            | 0.0003291           | 3.96E-05              | 0.002611         | 0.67496          | 0.49015          | 0.644293         | 0.402828                     |                              |
| NM_007741 // Col9a2 // procollagen, type IX, alpha 2 // 4 D2.2 4       | 53,22        | 6916849       | 4                    | 2                     | 0.0001418            | 0.0005472           | 0.0013238             | 0.0251239        | 0.946822         | 0.984439         | 0.750898         | 0.598067                     |                              |
| NM_007742 // Col1a1 // procollagen, type I, alpha 1 // 11 D 11         | 56.0, 38     | 6783685       | 4                    | 2                     | 0.0058713            | 2.26E-07            | 0.0013053             | 2.15E-06         | 0.996113         | 0.916291         | 0.756922         | 0.655957                     |                              |
| NM_147779 // Sftpb // surfactant associated protein B // 6 C1 6        | 31.0, 12     | 6946968       | 4                    | 2                     | 1.11E-05             | 0.0485727           | 0.0372773             | 0.0002637        | 0.778462         | 0.966752         | 0.818777         | 0.771412                     |                              |
| XM_896593 // B230218P12Rik // RIKEN cDNA B230218P12 gene //            | 23           | 6962502       | 4                    | 1                     | 7.46E-05             | 0.0363629           | 0.041808              | 0.0287643        | 0.929404         | 0.323202         | 1.34E-12         | 0.0119229                    |                              |
| NM_206535 // Cd200r2 // Cd200 receptor 2 // 16 B4 // 271375 // NM      | 9            | 6841140       | 4                    | 1                     | 0.0469569            | 0.0011224           | 0.0873431             | 0.003935         | 0.115403         | 0.0002121        | 0.0133992        | 0.290122                     |                              |
| NM_024477 // Ttc28 // tetratricopeptide repeat domain 28 // 5 F //     | 2C 18        | 6933474       | 4                    | 1                     | 0.0348897            | 0.0193654           | 0.0089276             | 0.0004221        | 0.484135         | 0.926197         | 0.0930573        | 0.65102                      |                              |
| NM_029846 // Atg16l1 // autophagy-related 16-like 1 (yeast) // 1       | D // 22      | 6751345       | 4                    | 1                     | 8.90E-05             | 0.0026704           | 0.0072461             | 0.0088352        | 0.88051          | 0.84218          | 0.153497         | 0.910805                     |                              |
| NM_007630 // Ccnb2 // cyclin B2 // 9 D // 12442 // XM_974848 //        | LC 13        | 6996649       | 4                    | 1                     | 4.86E-05             | 0.0320455           | 0.0043949             | 0.0401636        | 0.907814         | 0.983863         | 0.215049         | 0.622312                     |                              |
| NM_001037712 // Kcnh6 // potassium voltage-gated channel, subfa        | 8            | 6784591       | 4                    | 1                     | 0.028874             | 1.36E-05            | 0.933712              | 0.0131087        | 0.364476         | 0.0053863        | 0.225372         | 0.920292                     |                              |
| NM_175074 // Hmgn3 // high mobility group nucleosomal binding          | dc 8         | 6997349       | 4                    | 0                     | 0.156763             | 0.013771            | 0.0091699             | 0.0011569        | 0.927912         | 0.0434           | 1.99E-07         | 4.85E-15                     |                              |
| NM_181569 // Mare // alpha globin regulatory element containing        | gs 16        | 6787102       | 4                    | 0                     | 0.0016278            | 0.0266672           | 0.0280811             | 0.0026882        | 0.991018         | 0.933747         | 0.0009609        | 0.693719                     |                              |
| NM_138673 // Stab2 // stabilin 2 // 10 C1 // 192188 // AK164675 //     | € 69         | 6775762       | 3                    | 3                     | 1.60E-08             | 7.09E-05            | 3.99E-08              | 0.395984         | 0.999999         | 0.987122         | 0                | 0                            |                              |
| NM_024245 // Kif23 // kinesin family member 23 // 9 B // 71819 //      | B 27         | 6996186       | 3                    | 3                     | 0.72759              | 1.02E-08            | 0.0002938             | 1.33E-06         | 0.872051         | 0.919268         | 7.15E-38         | 8.06E-34                     |                              |
| XM_001001170 // Rgl1 // ral guanine nucleotide dissociation stimula    | 27           | 6763090       | 3                    | 3                     | 9.22E-07             | 2.26E-06            | 3.43E-07              | 0.137445         | 0.999729         | 0.747762         | 1.52E-37         | 1.99E-41                     |                              |
| NM_001039546 // Myo6 // myosin VI // 9 E1 9 44.0 cM // 17920           | 34           | 6990774       | 3                    | 3                     | 2.35E-07             | 1.00E-05            | 0.819889              | 0.575904         | 0.994545         | 2.18E-09         | 1.49E-22         | 0.374682                     |                              |
| NM_010778 // Cd46 // CD46 antigen, complement regulatory protei        | 24           | 6765460       | 3                    | 3                     | 9.05E-05             | 0.0002934           | 0.0004712             | 0.943393         | 0.99631          | 0.990708         | 9.32E-09         | 4.22E-10                     |                              |
| NM_007995 // Fcna // ficolin A // 2 A3 // 14133 // AK133539 //         | Fcna 11      | 6885432       | 3                    | 3                     | 0.0506094            | 6.26E-07            | 8.13E-05              | 5.76E-05         | 0.950293         | 0.934335         | 2.63E-05         | 2.67E-15                     |                              |
| NM_023587 // Ptplb // protein tyrosine phosphatase-like (proline       | insl 39      | 6836602       | 3                    | 3                     | 0.0546053            | 5.25E-19            | 9.72E-05              | 1.23E-08         | 0.998248         | 0.898594         | 0.0255978        | 0.005623                     |                              |
| NM_177236 // Atp2b3 // ATPase, Ca++ transporting, plasma membr         | 25           | 7011937       | 3                    | 3                     | 9.80E-07             | 5.83E-06            | 0.210673              | 2.38E-05         | 0.998699         | 0.951771         | 0.11136          | 0.0396572                    |                              |
| NM_198619 // MGC67181 // zinc finger-like protein // 4 E2 //           | 242747 18    | 6828333       | 3                    | 2                     | 0.0412797            | 2.20E-15            | 0.749923              | 5.82E-06         | 0.965982         | 0.969615         | 3.53E-21         | 1.58E-16                     |                              |
| XR_003333 // LOC640058 // similar to killer cell lectin-like receptor, | 24           | 6957435       | 3                    | 2                     | 0.113112             | 0.776013            | 5.94E-07              | 0.0004763        | 0.999974         | 0.0057036        | 7.06E-15         | 0                            |                              |
| NM_008984 // Ptpm // protein tyrosine phosphatase, receptor type,      | 40           | 6856756       | 3                    | 2                     | 0.0768984            | 1.60E-05            | 0.0234164             | 8.80E-05         | 0.981948         | 0.981333         | 3.56E-11         | 4.89E-07                     |                              |
| NM_009926 // Col11a2 // procollagen, type XI, alpha 2 // 17 B1 17      | 1,46         | 6860001       | 3                    | 2                     | 0.0155003            | 0.000916            | 0.259966              | 0.0006087        | 0.993039         | 0.997954         | 2.02E-10         | 0.487467                     |                              |
| NM_009862 // Cdc45l // cell division cycle 45 homolog (S. cerevisia    | 22           | 6844359       | 3                    | 2                     | 0.530433             | 0.0001927           | 0.0014021             | 5.51E-05         | 0.999195         | 0.746951         | 5.48E-08         | 0.0001272                    |                              |
| NM_030260 // Zxdc // ZXD family zinc finger C // 6 D2 // 80292 //      | NI 16        | 6947929       | 3                    | 2                     | 0.001602             | 0.0001354           | 0.136204              | 7.68E-07         | 0.999361         | 0.985882         | 0.0001104        | 0.44012                      |                              |
| NM_026059 // 2900005J15Rik // RIKEN cDNA 2900005J15 gene //            | 8            | 6929349       | 3                    | 2                     | 0.112743             | 0.0001039           | 0.0274056             | 5.99E-07         | 0.999219         | 0.994536         | 0.000167         | 0.929038                     |                              |
| NM_030014 // Hook1 // hook homolog 1 (Drosophila) // 4 C5 4            | 45.5, 23     | 6915567       | 3                    | 2                     | 0.0114408            | 0.0007128           | 0.0004055             | 0.180503         | 0.512633         | 0.486719         | 0.000419         | 0.0053384                    |                              |

Wu Supp Table 7: Group F Genes



|    | A                                                                             | B            | C             | D                           | E                            | F                   | G                    | H                    | I                    | J                      | K                      | L                                | M                                |
|----|-------------------------------------------------------------------------------|--------------|---------------|-----------------------------|------------------------------|---------------------|----------------------|----------------------|----------------------|------------------------|------------------------|----------------------------------|----------------------------------|
| 1  | Gene Description                                                              | # Probe Sets | Transcript ID | Number of cell types p<0.05 | Number of cell types p<0.001 | p value wt v th CD4 | P value wt vs th CD4 | p value wt vs th CD8 | p value wt vs th CD8 | p value wt vs th CD8SP | p value wt vs th CD4SP | P-value WT naïve v WT memory CD4 | P-value WT naïve v WT memory CD8 |
| 2  | NM 138673 // Stab2 // 10 C1 // 192188 // AK164675 // Sta69                    | 6775762      | 6775762       | 3                           | 2                            | 1.60E-08            | 7.09E-05             | 0.39E-08             | 0.39E-08             | 0.999999               | 0.987122               | 0                                | 0                                |
| 3  | NM 011682 // Utrn // utrophin // 10 A110 3.0 cM // 22288 // AK041437          | 6772193      | 6772193       | 2                           | 1                            | 0.159699            | 1.27E-16             | 8.74E-05             | 0.522169             | 0.999996               | 0.999116               | 0                                | 2.17E-05                         |
| 4  | NM 009109 // Ryr1 // ryanodine receptor 1, skeletal muscle // 7 A2-B3         | 6966183      | 6966183       | 3                           | 1                            | 0.0247109           | 1.16E-05             | 0.710008             | 0.0041708            | 0.999665               | 0.999976               | 6.59E-44                         | 1.00E-33                         |
| 5  | XM 898936 // LOC434328 // hypothetical LOC434328 // 8 B3.3 // 434             | 6940431      | 6940431       | 3                           | 2                            | 0.0103945           | 8.64E-06             | 0.0622501            | 2.94E-07             | 0.973513               | 0.811818               | 2.11E-39                         | 0                                |
| 6  | NM 010553 // Il1rap // interleukin 18 receptor accessory protein // 1         | 6748893      | 6748893       | 1                           | 0                            | 0.820427            | 0.0030746            | 0.944638             | 0.549918             | 1                      | 0.844381               | 6.82E-39                         | 3.61E-19                         |
| 7  | NM 024245 // Kif23 // kinesin family member 23 // 9 B // 71819 // BC27        | 6996186      | 6996186       | 3                           | 3                            | 0.72759             | 1.02E-08             | 0.0002938            | 1.35E-08             | 0.872051               | 0.919268               | 7.15E-38                         | 8.06E-34                         |
| 8  | NM 009778 // C3 // complement component 3 // 17 E1-E3 // 17 34.3 cM           | 6856290      | 6856290       | 3                           | 2                            | 1.35E-06            | 2.88E-05             | 0.0011648            | 0.0987891            | 0.998447               | 0.96805                | 1.02E-37                         | 5.24E-14                         |
| 9  | XM 001001170 // Rq1 // ral guanine nucleotide dissociation stimulat           | 6763090      | 6763090       | 3                           | 3                            | 9.22E-07            | 2.28E-06             | 3.43E-07             | 0.137445             | 0.999729               | 0.747762               | 1.52E-37                         | 1.99E-41                         |
| 10 | NM 008512 // Lrp1 // low density lipoprotein receptor-related protein         | 6777957      | 6777957       | 3                           | 0                            | 0.0375073           | 0.196676             | 0.0480725            | 0.0321942            | 0.694163               | 0.948985               | 7.09E-37                         | 1.75E-38                         |
| 11 | XM 910432 // LOC209589 // similar to 40S ribosomal protein S7 (S8)            | 6954415      | 6954415       | 1                           | 0                            | 0.363248            | 0.025593             | 0.985096             | 0.0768466            | 0.998866               | 0.997807               | 9.63E-37                         | 1.21E-18                         |
| 12 | NM 053214 // Myo11 // myosin IF // 17 B-C // 17 17.5 cM // 17916 // NM        | 6849951      | 6849951       | 1                           | 0                            | 0.453443            | 0.0074038            | 0.151558             | 0.939408             | 0.99991                | 0.967273               | 1.97E-36                         | 1.26E-06                         |
| 13 | XR 004438 // LOC670718 // similar to PRAME family member 10 // /26            | 6953507      | 6953507       | 2                           | 1                            | 0.117389            | 0.0004429            | 0.273319             | 0.0355063            | 0.371439               | 0.99643                | 6.81E-36                         | 7.51E-41                         |
| 14 | NM 010766 // Marco // macrophage receptor with collagenous structu            | 6761701      | 6761701       | 3                           | 2                            | 1.89E-05            | 7.59E-05             | 0.0027874            | 0.0500443            | 0.950442               | 0.941175               | 1.04E-34                         | 1.09E-14                         |
| 15 | NM 023122 // Gpm6b // glycoprotein m6b // X F5 // 14758 // AF254819           | 7015061      | 7015061       | 0                           | 0                            | 0.378249            | 0.467384             | 0.271461             | 0.149154             | 0.941756               | 0.998698               | 1.00E-33                         | 2.25E-05                         |
| 16 | XM 001001359 // LOC668417 // similar to Ig heavy chain V region M6            | 6803946      | 6803946       | 1                           | 0                            | 0.0466881           | 0.707816             | 0.128173             | 0.490651             | 1                      | 0.991496               | 2.30E-33                         | 4.84E-21                         |
| 17 | NM 033078 // Klrk1 // killer cell lectin-like receptor subfamily K, memb      | 6957406      | 6957406       | 0                           | 0                            | 0.0552567           | 0.588688             | 0.150833             | 0.142591             | 0.995939               | 0.92472                | 7.84E-31                         | 1.81E-18                         |
| 18 | NM 013813 // Epb4.113 // erythrocyte protein band 4.1-like 3 // 17 E1         | 6851897      | 6851897       | 3                           | 2                            | 1.89E-06            | 0.0010443            | 0.0001243            | 0.634407             | 0.89185                | 0.973813               | 3.79E-30                         | 2.98E-22                         |
| 19 | NM 009782 // Cacna1e // calcium channel, voltage-dependent, R type4           | 6763196      | 6763196       | 1                           | 0                            | 0.37593             | 0.681418             | 0.0187135            | 0.461113             | 0.911714               | 0.595                  | 1.98E-29                         | 1.26E-44                         |
| 20 | NM 980588 // LOC670310 // hypothetical protein LOC670310 // /6742             | 6847748      | 6847748       | 1                           | 0                            | 0.999466            | 0.984405             | 0.0072723            | 0.156007             | 0.999897               | 0.999893               | 2.11E-29                         | 0.00066412                       |
| 21 | NM 019507 // Tbx21 // T-box 21 // 11 D // 57765                               | 6791171      | 6791171       | 1                           | 0                            | 0.364406            | 0.0081552            | 0.541437             | 0.352382             | 0.999638               | 0.996226               | 8.56E-29                         | 5.30E-19                         |
| 22 | NM 029600 // Abcc3 // ATP-binding cassette, sub-family C (CFTR/MR             | 6790944      | 6790944       | 4                           | 1                            | 0.0326833           | 3.03E-05             | 0.026733             | 0.0109198            | 0.970653               | 0.998085               | 2.33E-28                         | 1.29E-22                         |
| 23 | NM 007708 // Cit // citron // 5 F // 12704 // AK047757 // C030025P15          | 6933697      | 6933697       | 4                           | 2                            | 0.0138462           | 5.49E-08             | 0.0254447            | 1.12E-07             | 0.999615               | 0.998915               | 4.43E-28                         | 4.34E-13                         |
| 24 | NM 019984 // Tgm1 // transglutaminase 1, K polypeptide // 14 C1 // 2          | 6824838      | 6824838       | 3                           | 1                            | 1.89E-05            | 0.0450446            | 0.0469582            | 0.0568131            | 0.891307               | 0.972709               | 4.61E-28                         | 5.77E-09                         |
| 25 | XM 910215 // LOC635217 // similar to leucine-rich repeat kinase 1 // /47      | 6967969      | 6967969       | 1                           | 0                            | 0.334209            | 0.373059             | 0.0763829            | 0.0381961            | 0.924452               | 0.97671                | 3.01E-27                         | 0                                |
| 26 | NM 008396 // Itga2 // integrin alpha E // 13 D2.2 // 13 64.0 cM // 16398      | 6816247      | 6816247       | 1                           | 0                            | 0.231084            | 0.0133003            | 0.386708             | 0.138414             | 0.864085               | 0.561884               | 4.40E-27                         | 9.52E-18                         |
| 27 | NM 008399 // Itgae // integrin, alpha E, epithelial-associated // 11 B4 // 34 | 6782286      | 6782286       | 3                           | 1                            | 0.244301            | 0.0045476            | 0.0024081            | 0.113782             | 2.48E-05               | 0.909793               | 9.36E-27                         | 2.83E-05                         |
| 28 | NM 172285 // Plcg2 // phospholipase C, gamma 2 // 8 E1 // 234779              | 6979439      | 6979439       | 0                           | 0                            | 0.120552            | 0.651429             | 0.268655             | 0.262649             | 0.835133               | 0.999997               | 3.72E-26                         | 9.72E-22                         |
| 29 | NM 019670 // Diap3 // diaphanous homolog 3 (Drosophila) // 14 D3 // 30        | 6826546      | 6826546       | 1                           | 0                            | 0.462031            | 0.001635             | 0.436757             | 0.0628106            | 0.99973                | 0.99677                | 1.08E-25                         | 5.36E-09                         |
| 30 | NM 138301 // Trpm2 // transient receptor potential cation channel, sub        | 6775236      | 6775236       | 2                           | 0                            | 0.959002            | 0.0040308            | 0.30893              | 0.0103137            | 0.640473               | 0.996668               | 2.50E-25                         | 0                                |
| 31 | XR 005042 // LOC676711 // similar to MOR-related gene 15 isoform 19           | 6869503      | 6869503       | 1                           | 1                            | 0.174996            | 4.70E-09             | 0.594723             | 0.28185              | 0.999804               | 0.999936               | 3.80E-25                         | 3.34E-18                         |
| 32 | NM 010587 // Itsn1 // intersectin 1 (SH3 domain protein 1A) // 16 C3.43       | 6843198      | 6843198       | 4                           | 2                            | 0.0225853           | 5.55E-05             | 0.0089652            | 2.70E-05             | 0.982168               | 0.962889               | 9.58E-25                         | 3.31E-13                         |
| 33 | NM 146064 // Soat2 // sterol O-acyltransferase 2 // 15 F315 61.7 cM // 19     | 6833394      | 6833394       | 3                           | 0                            | 0.0251807           | 0.0262788            | 0.175356             | 0.0200463            | 0.995049               | 0.992311               | 1.91E-24                         | 5.61E-07                         |
| 34 | NM 008905 // Ppifb2 // protein tyrosine phosphatase, receptor-type, 2         | 6963271      | 6963271       | 0                           | 0                            | 0.641385            | 0.192807             | 0.0780662            | 0.85174              | 0.942276               | 0.289105               | 4.31E-24                         | 0                                |
| 35 | NM 018797 // Plxn1 // plexin C1 // 10 C3 // 54712 // XM 622776 // 29          | 6776156      | 6776156       | 2                           | 0                            | 0.0367115           | 0.148694             | 0.0432887            | 0.671045             | 0.997026               | 0.887155               | 5.51E-24                         | 8.26E-36                         |
| 36 | NM 013839 // Nr1h3 // nuclear receptor subfamily 1, group H, memb             | 6888752      | 6888752       | 2                           | 0                            | 0.0162327           | 0.0057317            | 0.53222              | 0.636925             | 0.891437               | 0.985738               | 5.73E-24                         | 1.24E-06                         |
| 37 | NM 199240 // Sema6d // sema domain, transmembrane domain (TM)                 | 6880776      | 6880776       | 2                           | 0                            | 0.121058            | 0.0085771            | 0.0018627            | 0.216257             | 0.992406               | 0.204383               | 8.11E-24                         | 1.21E-23                         |
| 38 | NM 028341 // 2810439F02Rik // RIKEN cDNA 2810439F02 gene // 11 13             | 6858910      | 6858910       | 1                           | 0                            | 0.904461            | 0.0370393            | 0.117949             | 0.154325             | 0.898593               | 0.869242               | 1.34E-23                         | 4.45E-05                         |
| 39 | XM 986599 // LOC666183 // hypothetical protein LOC666183 // 15 B3.35          | 6811724      | 6811724       | 1                           | 0                            | 0.0373188           | 0.717877             | 0.0774006            | 0.0545691            | 0.975854               | 0.796488               | 2.06E-23                         | 1.38E-28                         |
| 40 | NM 009820 // Runx2 // runt related transcription factor 2 // 17 B3 // 17 2    | 6855657      | 6855657       | 1                           | 1                            | 0.995697            | 5.27E-07             | 0.98955              | 0.237407             | 0.55498                | 0.77547                | 5.51E-23                         | 1.64E-25                         |
| 41 | NM 173437 // Nav1 // neuron navigator 1 // 1 E4 // 215690 // BC0288           | 6762429      | 6762429       | 1                           | 0                            | 0.991536            | 0.89767              | 0.445484             | 0.0103129            | 0.893627               | 0.997375               | 1.29E-22                         | 5.18E-43                         |
| 42 | XM 001002503 // LOC668592 // hypothetical protein LOC668592 // /134           | 6856231      | 6856231       | 0                           | 0                            | 0.400684            | 0.0633128            | 0.373424             | 0.297145             | 0.998684               | 0.997022               | 1.74E-22                         | 4.08E-15                         |
| 43 | NM 013689 // Tec // cytoplasmic tyrosine kinase, Dsrc28C related (Dr          | 6939077      | 6939077       | 1                           | 0                            | 0.856515            | 0.0381141            | 0.195075             | 0.778324             | 0.998133               | 0.675696               | 2.60E-22                         | 2.02E-05                         |
| 44 | NM 146001 // Hip1 // huntingtin interacting protein 1 // 5 F-G2 // 75.0       | 6942441      | 6942441       | 0                           | 0                            | 0.477525            | 0.590469             | 0.388991             | 0.0977287            | 0.892995               | 0.998572               | 3.40E-22                         | 5.36E-22                         |
| 45 | AK080042 // Timd4 // T-cell immunoglobulin and mucin domain contain           | 6780572      | 6780572       | 2                           | 0                            | 0.0022584           | 0.0073877            | 0.958543             | 0.797921             | 0.991205               | 0.783873               | 7.76E-22                         | 3.12E-08                         |
| 46 | NM 008479 // Lag3 // lymphocyte-activation gene 3 // 6 F2 // 16768            | 6957144      | 6957144       | 1                           | 0                            | 0.375641            | 0.314116             | 0.804002             | 0.0038405            | 0.524867               | 0.964221               | 1.05E-21                         | 7.21E-21                         |
| 47 | NM 198619 // MGC67181 // zinc finger-like protein // 4 E2 // 242747 // 18     | 6882333      | 6882333       | 3                           | 2                            | 0.0412797           | 2.20E-15             | 0.749923             | 5.82E-06             | 0.965982               | 0.969615               | 3.53E-21                         | 1.58E-16                         |
| 48 | NM 133348 // Acot7 // acyl-CoA thioesterase 7 // 4 E2 // 70025 // ABC         | 6919012      | 6919012       | 0                           | 0                            | 0.930541            | 0.375569             | 0.0327396            | 0.448251             | 0.828811               | 0.897344               | 5.83E-21                         | 2.11E-11                         |
| 49 | NM 145150 // Prc1 // protein regulator of cytokinesis 1 // 7 D2 // 38.0       | 6961987      | 6961987       | 2                           | 2                            | 0.749792            | 2.57E-08             | 0.649827             | 5.01E-05             | 0.99982                | 0.99758                | 1.12E-20                         | 9.74E-14                         |
| 50 | NM 010620 // Kif15 // kinesin family member 15 // 9 F4 // 209737 // A         | 6939098      | 6939098       | 3                           | 1                            | 0.189231            | 1.15E-06             | 0.0493535            | 0.0055144            | 0.999997               | 0.999965               | 1.16E-20                         | 8.32E-17                         |
| 51 | NM 133762 // Luszp5 // leucine zipper protein 5 // 12 F2 // 76044 // NM       | 6798403      | 6798403       | 1                           | 0                            | 0.529504            | 0.0054249            | 0.287531             | 0.227871             | 0.999999               | 0.977289               | 2.35E-20                         | 1.35E-18                         |
| 52 | XM 001003501 // Arhgap21 // Rho GTPase activating protein 21 // 2 A           | 6885195      | 6885195       | 2                           | 0                            | 0.0079024           | 0.0239037            | 0.612141             | 0.309582             | 0.970353               | 0.912205               | 2.46E-20                         | 6.94E-17                         |
| 53 | NM 010580 // Itgb5 // integrin beta 5 // 16 B3 // 16419                       | 6840637      | 6840637       | 3                           | 1                            | 0.0108366           | 8.61E-10             | 0.0112335            | 0.299047             | 0.998826               | 0.982242               | 4.53E-20                         | 2.21E-17                         |
| 54 | XM 981660 // LOC666111 // similar to 60S ribosomal protein L29 // 18 9        | 6816161      | 6816161       | 2                           | 1                            | 0.378008            | 0.0088307            | 0.991772             | 2.33E-08             | 0.835094               | 0.740917               | 6.25E-20                         | 1.17E-24                         |
| 55 | NM 181072 // Myo1e // myosin IE // 9 D19 41.0 cM // 71602 // AK029            | 6990263      | 6990263       | 0                           | 0                            | 0.221131            | 0.921942             | 0.638589             | 0.832616             | 0.989289               | 0.966401               | 1.30E-19                         | 3.81E-13                         |
| 56 | NM 173762 // Cenpe // centromere protein E // 3 H2 // 229841 // AK1           | 6901592      | 6901592       | 1                           | 0                            | 0.866774            | 0.0299485            | 0.534503             | 0.26722              | 0.995279               | 0.99849                | 2.29E-19                         | 4.77E-10                         |
| 57 | NM 013470 // Anxa3 // annexin A3 // 5 E3 // 54.0 cM // 11745 // XM            | 6932603      | 6932603       | 3                           | 2                            | 0.0004609           | 0.0010954            | 7.97E-06             | 0.0587045            | 0.734463               | 0.913759               | 2.53E-19                         | 1.14E-23                         |
| 58 | NM 007403 // Adam8 // a disintegrin and metalloproteinase domain 8            | 6927106      | 6927106       | 1                           | 0                            | 0.521156            | 0.0202059            | 0.0903424            | 0.108468             | 0.9191                 | 0.943855               | 2.90E-19                         | 6.64E-41                         |
| 59 | XM 897921 // Slc43a1 // solute carrier family 43, member 1 // 2 E1 // 19      | 6878712      | 6878712       | 1                           | 0                            | 0.288088            | 0.259083             | 0.456387             | 0.0270844            | 0.999972               | 0.922638               | 6.00E-19                         | 2.33E-14                         |
| 60 | NM 013862 // Rabgap1 // RAB GTPase activating protein 1-like // 1 H           | 6763495      | 6763495       | 1                           | 0                            | 0.918466            | 0.0053322            | 0.516199             | 0.506                | 0.967067               | 0.983042               | 8.70E-19                         | 8.95E-06                         |
| 61 | XM 981230 // Atp2b4 // ATPase, Ca++ transporting, plasma membran              | 6762321      | 6762321       | 1                           | 1                            | 0.681759            | 1.42E-07             | 0.899212             | 0.405945             | 0.729198               | 0.641887               | 1.44E-18                         | 4.00E-10                         |
| 62 | NM 013464 // Ahr // aryl-hydrocarbon receptor // 12 A3 // 12 18.0 cM // 14    | 6800600      | 6800600       | 0                           | 0                            | 0.0650828           | 0.271184             | 0.760514             | 0.152377             | 0.907919               | 0.920033               | 2.01E-18                         | 4.68E-14                         |
| 63 | NM 011498 // Bhlhb2 // basic helix-loop-helix domain containing, clas         | 6948913      | 6948913       | 1                           | 0                            | 0.273225            | 0.861                | 0.0119766            | 0.405555             | 0.796547               | 0.850541               | 2.41E-18                         | 1.20E-09                         |
| 64 | NM 173006 // Pon3 // paraoxonase 3 // 6 A1 // 6 0.5 cM // 269823 // BC        | 6951401      | 6951401       | 0                           | 0                            | 0.094078            | 0.105558             | 0.505858             | 0.508239             | 0.984908               | 0.845589               | 2.50E-18                         | 3.43E-06                         |
| 65 | NM 147100 // Olfr614 // olfactory receptor 614 // // 259104 // NM             | 6976765      | 6976765       | 0                           | 0                            | 0.125494            | 0                    |                      |                      |                        |                        |                                  |                                  |

|     | A                                                                           | B            | C             | D                           | E                            | F                   | G                    | H                    | I                    | J                      | K                      | L                                | M                                |
|-----|-----------------------------------------------------------------------------|--------------|---------------|-----------------------------|------------------------------|---------------------|----------------------|----------------------|----------------------|------------------------|------------------------|----------------------------------|----------------------------------|
| 1   | Gene Description                                                            | # Probe Sets | Transcript ID | Number of cell types p<0.05 | Number of cell types p<0.001 | p value wt v th CD4 | P value wt vs th CD4 | p value wt vs th CD8 | p value wt vs th CD8 | p value wt vs th CD8SP | p value wt vs th CD4SP | P-value WT naïve v WT memory CD4 | P-value WT naïve v WT memory CD8 |
| 69  | NM 147218 // Abca6 // ATP-binding cassette, sub-family A (ABC1), member 6   | 46           | 6792122       | 2                           | 2                            | 0.403196            | 0.32678              | <b>0.0009098</b>     | <b>0.0001424</b>     | 1                      | 0.998482               | 1.27E-17                         | 3.77E-08                         |
| 70  | NM 182809 // Ntrk3 // neurotrophic tyrosine kinase, receptor, type 3        | 23           | 6968643       | 2                           | 1                            | 0.124627            | <b>0.46E-05</b>      | 0.984958             | <b>0.0012984</b>     | 0.99463                | 0.995026               | 1.57E-17                         | 7.09E-17                         |
| 71  | NM 029765 // Dtl // denticleless homolog (Drosophila) // 1 H6 // 7684324    | 24           | 6765235       | 1                           | 1                            | 0.527012            | <b>0.79E-06</b>      | 0.644849             | 0.110798             | 0.999991               | 0.971977               | 1.95E-17                         | 9.46E-11                         |
| 72  | NM 007615 // Ctrnd1 // catenin (cadherin associated protein), delta 1       | 25           | 6888307       | 1                           | 0                            | 0.118223            | 0.634409             | <b>0.0184886</b>     | 0.119119             | 0.95786                | 0.997951               | 2.44E-17                         | 2.66E-16                         |
| 73  | NM 177353 // Slc9a7 // solute carrier family 9 (sodium/hydrogen exchanger)  | 20           | 7015941       | 2                           | 0                            | 0.0911122           | 0.136488             | <b>0.0184892</b>     | <b>0.0034303</b>     | 0.999998               | 0.978249               | 2.76E-17                         | 6.14E-14                         |
| 74  | NM 173051 // Serpinb1c // serine (or cysteine) peptidase inhibitor, clade B | 16           | 6812178       | 1                           | 0                            | 0.242115            | <b>0.0255545</b>     | 0.183821             | 0.99568              | 0.996859               | 0.741448               | 4.13E-17                         | 9.82E-15                         |
| 75  | NM 011597 // Tjp2 // tight junction protein 2 // 1 // 21873 // AK076689     | 24           | 6872250       | 0                           | 0                            | 0.367341            | 0.937586             | 0.98468              | 0.596253             | 0.548885               | 0.995699               | 5.00E-17                         | 1.94E-16                         |
| 76  | XM 622573 // Anxa2 // annexin A2 // 9 C19 37.0 cM // 12306 // NM 015        | 15           | 6990216       | 1                           | 0                            | 0.180536            | <b>0.0276161</b>     | 0.990005             | 0.952589             | 0.767704               | 0.850836               | 5.50E-17                         | 2.24E-15                         |
| 77  | NM 028072 // Sulf2 // sulfatase 2 // 2 H3 // 72043 // AK129316 // Sulf2     | 24           | 6893057       | 0                           | 0                            | 0.0543707           | 0.291321             | 0.104564             | 0.106127             | 0.977561               | 0.973333               | 5.97E-17                         | 1.00E-22                         |
| 78  | NM 010790 // Melk // maternal embryonic leucine zipper kinase // 4 B1       | 24           | 6913080       | 3                           | 2                            | 0.0866639           | <b>0.0033267</b>     | <b>0.0110967</b>     | <b>0.0006279</b>     | 0.996733               | 0.822457               | 7.92E-17                         | 9.00E-20                         |
| 79  | NM 011125 // Ptpb // phospholipid transfer protein // 2 H3/2 93.0 cM // 14  | 14           | 6892964       | 0                           | 0                            | 0.059598            | 0.24571              | 0.473189             | 0.693006             | 0.954592               | 0.627444               | 9.01E-17                         | 7.51E-05                         |
| 80  | XM 913343 // LOC637609 // similar to receptor-like tyrosine kinase // 18    | 18           | 6991991       | 0                           | 0                            | 0.090156            | 0.218542             | 0.486874             | 0.0969846            | 0.831839               | 0.909947               | 1.02E-16                         | 0.00033746                       |
| 81  | XR 003401 // LOC671381 // similar to prothymosin alpha // 1 // 671381       | 22           | 6805180       | 2                           | 0                            | <b>0.0013441</b>    | 0.235281             | 0.10337              | <b>0.0287251</b>     | 0.993955               | 0.984475               | 1.03E-16                         | 0.00016139                       |
| 82  | NM 009772 // Bub1 // budding uninhibited by benzimidazoles 1 homolog        | 24           | 6890715       | 1                           | 0                            | 0.647613            | <b>0.0038388</b>     | 0.451474             | 0.0756314            | 0.97943                | 0.804034               | 1.46E-16                         | 3.33E-13                         |
| 83  | XM 917417 // LOC640461 // similar to eukaryotic translation initiation      | 25           | 6880451       | 1                           | 0                            | 0.505088            | 0.0695661            | <b>0.0468822</b>     | 0.291741             | 0.999944               | 0.999823               | 1.46E-16                         | 1.07E-13                         |
| 84  | XM 001003800 // Ptxnb2 // plexin B2 // 15 43.0 cM // 140570 // NM 043       | 43           | 6837787       | 2                           | 0                            | 0.144673            | 0.203358             | <b>0.0395882</b>     | <b>0.0265042</b>     | 0.999992               | 0.418486               | 1.76E-16                         | 4.39E-20                         |
| 85  | NM 025282 // Mef2c // myocyte enhancer factor 2C // 13 C13 45.0 // 17       | 17           | 6808609       | 1                           | 0                            | <b>0.0043331</b>    | 0.156645             | 0.116024             | 0.112253             | 0.997218               | 0.753733               | 1.80E-16                         | 7.78E-16                         |
| 86  | NM 177192 // D030011010Rik // RIKEN cDNA D030011010 gene // 17              | 17           | 6958439       | 1                           | 0                            | <b>0.0333296</b>    | 0.0604442            | 0.519182             | 0.0779539            | 0.934848               | 0.997988               | 2.70E-16                         | 3.02E-08                         |
| 87  | XM 907196 // LOC632908 // similar to Cell division control protein 6 H9     | 9            | 6784054       | 3                           | 1                            | <b>0.0329392</b>    | <b>0.18E-10</b>      | 0.474982             | <b>0.0031607</b>     | 0.999586               | 0.81319                | 3.05E-16                         | 2.18E-11                         |
| 88  | NM 008534 // Lys9 // lymphocyte antigen 9 // 11 H31 93.3 cM // 17085        | 11           | 6764093       | 0                           | 0                            | 0.548256            | 0.465809             | 0.909913             | 0.943256             | 0.956245               | 0.993951               | 3.93E-16                         | 1.90E-20                         |
| 89  | NM 145148 // Frmd4b // FERM domain containing 4B // 6 D3 // 23228           | 23           | 6955778       | 1                           | 0                            | 0.189809            | 0.108221             | <b>0.0177604</b>     | 0.0752124            | 0.938519               | 0.726671               | 4.04E-16                         | 4.53E-14                         |
| 90  | NM 146023 // Evi2b // ecotropic viral integration site 2b // 11 B5 // 216   | 16           | 6790046       | 0                           | 0                            | 0.340891            | 0.0542889            | 0.270646             | 0.398427             | 0.999954               | 0.99759                | 4.41E-16                         | 2.18E-07                         |
| 91  | XM 908720 // Gm1276 // gene model 1276, (NCBI) // 19 A // 383435            | 10           | 6871545       | 1                           | 0                            | 0.216074            | <b>0.0013965</b>     | 0.329563             | 0.0803065            | 0.523219               | 0.994779               | 6.76E-16                         | 8.32E-08                         |
| 92  | NM 008969 // Ptgs1 // prostaglandin-endoperoxide synthase 1 // 2 B1         | 13           | 6876430       | 4                           | 1                            | <b>0.0133948</b>    | <b>0.0008156</b>     | <b>0.0026003</b>     | <b>0.0229365</b>     | 0.817433               | 0.986077               | 8.71E-16                         | 5.58E-11                         |
| 93  | NM 183222 // Fcrl5 // Fc receptor-like 5 // 3 F1 // 329693 // AK089751      | 15           | 6899000       | 2                           | 0                            | <b>0.0112823</b>    | 0.253855             | <b>0.0150613</b>     | 0.132131             | 0.703259               | 0.885901               | 8.99E-16                         | 1.02E-12                         |
| 94  | NM 013471 // Anxa4 // annexin A4 // 6 D1/6 38.0 cM // 11746 // NM 015       | 15           | 6955228       | 0                           | 0                            | 0.34321             | 0.139689             | 0.0984367            | 0.16494              | 0.143616               | 0.897197               | 9.44E-16                         | 5.47E-27                         |
| 95  | NM 007421 // Adssl1 // adenylosuccinate synthetase like 1 // 12 F1 // 15    | 15           | 6789271       | 1                           | 0                            | 0.123609            | 0.178199             | 0.0727601            | <b>0.0034485</b>     | 0.687657               | 0.958027               | 1.09E-15                         | 1.46E-07                         |
| 96  | XM 980183 // 1700020122Rik // RIKEN cDNA 1700020122 gene // 9 D8            | 8            | 6996678       | 1                           | 0                            | 0.593483            | 0.0895526            | <b>0.0091392</b>     | 0.36151              | 0.893179               | 0.255888               | 1.17E-15                         | 4.87E-09                         |
| 97  | NM 023044 // Slc15a3 // solute carrier family 15, member 3 // 19 B // 13    | 13           | 6868058       | 2                           | 0                            | <b>0.0388865</b>    | <b>0.0733956</b>     | 0.434195             | <b>0.0231613</b>     | 0.679651               | 0.211348               | 1.19E-15                         | 1.69E-08                         |
| 98  | NM 011623 // Top2a // topoisomerase (DNA) II alpha // 11 D1/11 57.0 // 34   | 34           | 6791298       | 2                           | 1                            | 0.0978802           | <b>0.35E-15</b>      | 0.124839             | <b>0.0027654</b>     | 0.999969               | 0.998402               | 1.35E-15                         | 2.56E-12                         |
| 99  | NM 027918 // 1300017J02Rik // RIKEN cDNA 1300017J02 gene // 9 14            | 14           | 6998938       | 0                           | 0                            | 0.0577516           | 0.0965191            | 0.434474             | 0.442219             | 0.818644               | 0.64803                | 1.56E-15                         | 0.00036903                       |
| 100 | AK046303 // Cd33 // CD33 antigen // 7 B3/7 23.0 cM // 12489 // AK0811       | 11           | 6966808       | 1                           | 1                            | <b>0.0005728</b>    | 0.132044             | 0.206949             | 0.282492             | 0.977608               | 0.768371               | 2.17E-15                         | 1.48E-05                         |
| 101 | NM 009465 // Axl // AXL receptor tyrosine kinase // 7 A3-B1/7 6.0 cM // 23  | 23           | 6956982       | 2                           | 0                            | <b>0.0021497</b>    | <b>0.0057682</b>     | 0.14408              | 0.290831             | 0.940576               | 0.999985               | 3.86E-15                         | 2.99E-26                         |
| 102 | NM 008923 // Prkar1b // protein kinase, cAMP dependent regulatory, 1        | 12           | 6942655       | 1                           | 1                            | <b>1.19E-05</b>     | 0.482075             | 0.17497              | 0.190223             | 0.961381               | 0.632848               | 4.00E-15                         | 1.33E-06                         |
| 103 | NM 181277 // Col14a1 // procollagen, type XIV, alpha 1 // 15 D // 128       | 45           | 6835056       | 3                           | 0                            | 0.281587            | <b>0.0061287</b>     | <b>0.0458286</b>     | <b>0.00898</b>       | 0.979459               | 0.999716               | 6.46E-15                         | 2.35E-10                         |
| 104 | XR 003333 // LOC640058 // similar to killer cell lectin-like receptor, sub  | 24           | 6957435       | 3                           | 2                            | 0.113112            | 0.776013             | <b>0.54E-07</b>      | <b>0.004763</b>      | 0.999974               | <b>0.0057036</b>       | 7.06E-15                         | 0                                |
| 105 | NM 153804 // Plekhg3 // pleckstrin homology domain containing, family       | 15           | 6791963       | 1                           | 0                            | 0.958483            | <b>0.0058731</b>     | 0.580021             | 0.233552             | 0.214956               | 0.412951               | 7.98E-15                         | 1.96E-06                         |
| 106 | XM 986085 // LOC671299 // similar to constitutive photomorphogenic          | 10           | 6957465       | 2                           | 0                            | <b>0.0370076</b>    | <b>0.227158</b>      | <b>0.0276641</b>     | 0.813414             | 0.929048               | 0.939161               | 8.27E-15                         | 8.04E-06                         |
| 107 | NM 010578 // Itgb1 // integrin beta 1 (fibronectin receptor beta) // 8 E    | 18           | 6980032       | 1                           | 1                            | <b>0.0003699</b>    | 0.230942             | 0.310869             | 0.997632             | 0.993433               | 0.773793               | 9.21E-15                         | 1.23E-06                         |
| 108 | NM 177025 // Cobl1 // Cobl-like 1 // 2 C3 // 319876 // AK052939 // C        | 18           | 6887286       | 2                           | 0                            | 0.139956            | <b>0.0020128</b>     | 0.373171             | <b>0.0373085</b>     | 0.946894               | 0.791024               | 1.01E-14                         | 3.17E-21                         |
| 109 | AJ010751 // Klrj1 // killer cell lectin-like receptor subfamily G, member   | 7            | 6957025       | 1                           | 0                            | 0.269208            | 0.870773             | 0.587001             | <b>0.0063354</b>     | 0.502413               | 0.959044               | 1.03E-14                         | 1.81E-13                         |
| 110 | NM 009516 // Wee1 // wee 1 homolog (S. pombe) // 7 E3 // 22390              | 15           | 6963418       | 1                           | 0                            | 0.0782962           | <b>0.0084571</b>     | 0.217214             | 0.406959             | 0.988383               | 0.998497               | 1.15E-14                         | 9.96E-06                         |
| 111 | XM 001001776 // LOC668491 // hypothetical protein LOC668491 // 14 9         | 9            | 6825872       | 0                           | 0                            | 0.566095            | 0.0500051            | 0.144421             | 0.860899             | 0.688662               | 0.895051               | 1.34E-14                         | 1.37E-06                         |
| 112 | NM 144553 // Dlg7 // discs, large homolog 7 (Drosophila) // 14 C1/14        | 20           | 6824346       | 0                           | 0                            | 0.413782            | <b>0.0021759</b>     | 0.92505              | 0.2725               | 0.999982               | 0.994736               | 1.37E-14                         | 2.80E-12                         |
| 113 | NM 145437 // 4732429D16Rik // RIKEN cDNA 4732429D16 gene // 18              | 18           | 6792371       | 1                           | 0                            | 0.0724003           | 0.982255             | 0.828407             | <b>0.0082844</b>     | 0.161219               | 0.963465               | 3.30E-14                         | 0.00010591                       |
| 114 | NM 008401 // Itgam // integrin alpha M // 7 F4 // 16409 // AK089521 // 31   | 31           | 6964380       | 0                           | 0                            | 0.853981            | 0.126937             | 0.504408             | 0.0751195            | 0.786636               | 0.980826               | 3.67E-14                         | 1.18E-22                         |
| 115 | NM 007779 // Csf1r // colony stimulating factor 1 receptor // 18 D/18       | 328          | 6861358       | 4                           | 1                            | <b>1.22E-05</b>     | <b>1.73E-08</b>      | <b>4.10E-07</b>      | <b>4.19E-05</b>      | 0.998956               | 0.998607               | 4.72E-14                         | 2.56E-40                         |
| 116 | NM 181318 // Rasgef1b // RasGEF domain family, member 1B // 5 E             | 316          | 6940303       | 2                           | 4                            | <b>0.0002294</b>    | <b>0.0146426</b>     | 0.521085             | 0.512663             | 0.998576               | 0.981235               | 4.77E-14                         | 1.28E-09                         |
| 117 | XM 986599 // LOC666183 // hypothetical protein LOC666183 // 15 B            | 31           | 6875181       | 4                           | 2                            | <b>0.0017147</b>    | <b>1.43E-06</b>      | <b>7.65E-05</b>      | <b>0.0400525</b>     | 0.981391               | 0.99595                | 5.33E-14                         | 0                                |
| 118 | NM 007680 // Ephb6 // Eph receptor B6 // 6 B2.1 // 13848                    | 22           | 6945730       | 1                           | 0                            | 0.765052            | <b>0.0013613</b>     | 0.257973             | 0.277039             | 0.991084               | 0.97331                | 6.39E-14                         | 0.00016966                       |
| 119 | NM 175172 // 4930506M07Rik // RIKEN cDNA 4930506M07 gene // 21              | 21           | 6874085       | 1                           | 0                            | 0.955692            | 0.241643             | 0.389342             | <b>0.0053483</b>     | 0.997212               | 0.716725               | 7.23E-14                         | 7.42E-38                         |
| 120 | NM 010187 // Fcgr2b // Fc receptor, IgG, low affinity IIB // 1 H31 92.3     | 8            | 6764038       | 0                           | 0                            | 0.187009            | 0.0771745            | 0.421957             | <b>0.0016062</b>     | 0.932596               | 0.926573               | 7.23E-14                         | 7.00E-14                         |
| 121 | XM 916960 // Mik // mixed lineage kinase domain-like // 8 D3 // 7456        | 11           | 6985361       | 0                           | 0                            | 0.327461            | 0.10005              | 0.164698             | 0.198486             | 0.924925               | 0.541239               | 7.45E-14                         | 0.00080935                       |
| 122 | NM 013484 // C2 // complement component 2 (within H-2S) // 17 B1/11         | 19           | 6855061       | 3                           | 1                            | <b>0.0494736</b>    | <b>0.006291</b>      | 0.203242             | <b>0.0230004</b>     | 0.575715               | 0.883897               | 8.41E-14                         | 2.87E-10                         |
| 123 | NM 009791 // Aspm // asp (abnormal spindle) like, microcephaly assoc        | 36           | 6735592       | 2                           | 2                            | 0.142883            | <b>3.44E-07</b>      | 0.1104               | <b>0.0001528</b>     | 0.999996               | 0.77895                | 9.66E-14                         | 4.87E-13                         |
| 124 | NM 019418 // Tnfrsf14 // tumor necrosis factor (ligand) superfamily, me     | 6            | 6856288       | 1                           | 0                            | 0.803464            | 0.423693             | <b>0.001538</b>      | 0.338165             | 0.80337                | 0.846106               | 1.01E-13                         | 4.92E-06                         |
| 125 | NM 173014 // Ayl1 // acyltransferase like 1 // 8 C5 // 270084 // XM 9 16    | 16           | 6927832       | 2                           | 0                            | <b>0.0086361</b>    | <b>0.0024696</b>     | 0.0647031            | 0.437003             | 0.999144               | 0.885737               | 1.12E-13                         | 3.91E-23                         |
| 126 | NM 009015 // Rad54 // RAD54 like (S. cerevisiae) // 4 D1 // 19366 // 24     | 24           | 6924763       | 1                           | 1                            | 0.414162            | <b>0.00016</b>       |                      |                      |                        |                        |                                  |                                  |

|     | A                                                                         | B            | C             | D                           | E                            | F                   | G                    | H                    | I                    | J                      | K                      | L                                | M                                |
|-----|---------------------------------------------------------------------------|--------------|---------------|-----------------------------|------------------------------|---------------------|----------------------|----------------------|----------------------|------------------------|------------------------|----------------------------------|----------------------------------|
| 1   | Gene Description                                                          | # Probe Sets | Transcript ID | Number of cell types p<0.05 | Number of cell types p<0.001 | p value wt v th CD4 | P value wt vs th CD4 | p value wt vs th CD8 | p value wt vs th CD8 | p value wt vs th CD8SP | p value wt vs th CD4SP | P-value WT naïve v WT memory CD4 | P-value WT naïve v WT memory CD8 |
| 136 | XM 001003509 // LOC629432 // hypothetical LOC629432 // 16 C1.3 // 19      | 6846571      |               | 0                           | 0                            | 0.414933            | 0.385145             | 0.329274             | 0.866225             | 0.947114               | 0.772756               | 3.23E-13                         | 1.57E-05                         |
| 137 | NM 008599 // Cxcl9 // chemokine (C-X-C motif) ligand 9 // 5 E2J5 53.7     | 6939987      |               | 0                           | 0                            | 0.663821            | 0.143864             | 0.117175             | 0.711835             | 0.297152               | 0.959925               | 3.44E-13                         | 4.50E-15                         |
| 138 | NM 001037136 // Centg2 // centaurin, gamma 2 // 1 D // 347722 // N1       | 6751442      |               | 1                           | 0                            | 0.335516            | 0.0118422            | 0.451294             | 0.212088             | 0.921662               | 0.911533               | 4.17E-13                         | 0.00033703                       |
| 139 | AK004232 // Pla2g2d // phospholipase A2, group IID // 4 D3J4 67.0 cM7     | 6918015      |               | 2                           | 0                            | 0.0447952           | 0.0493694            | 0.436076             | 0.523101             | 0.877136               | 0.567472               | 4.26E-13                         | 0.00019494                       |
| 140 | NM 008408 // Stt3a // STT3, subunit of the oligosaccharyltransferase 14   | 6994666      |               | 1                           | 0                            | 0.316988            | 0.0084814            | 0.605725             | 0.170372             | 0.9419                 | 0.933917               | 4.46E-13                         | 2.88E-08                         |
| 141 | NM 178045 // Rass4 // Ras association (RalGDS/AF-6) domain family 18      | 6956765      |               | 0                           | 0                            | 0.213668            | 0.0781927            | 0.094175             | 0.103378             | 0.78664                | 0.984447               | 5.13E-13                         | 1.04E-21                         |
| 142 | NM 001035509 // Zcchc18 // zinc finger, CCHC domain containing 18         | 7014048      |               | 1                           | 1                            | 0.0811219           | 0.683685             | 0.0592339            | 2.98E-07             | 0.69307                | 0.278015               | 7.47E-13                         | 2.48E-10                         |
| 143 | NM 139232 // Fqd4 // FYVE, RhoGEF and PH domain containing 4 // 121       | 6844210      |               | 2                           | 0                            | 0.398982            | 0.370092             | 0.0012616            | 0.0529363            | 0.0011222              | 0.946226               | 7.71E-13                         | 5.23E-08                         |
| 144 | NM 008278 // Hpgd // hydroxyprostaglandin dehydrogenase 15 (NAD)          | 6976237      |               | 2                           | 1                            | 0.0052925           | 8.20E-05             | 0.197758             | 0.311704             | 0.890865               | 0.956703               | 8.02E-13                         | 4.21E-08                         |
| 145 | NM 018775 // Tbc1d8 // TBC1 domain family, member 8 // 1 B // 5461        | 6758027      |               | 1                           | 0                            | 0.680063            | 0.213385             | 0.622695             | 0.0097005            | 0.711136               | 0.998773               | 8.52E-13                         | 9.16E-39                         |
| 146 | NM 001034098 // Tnfrsf12-tnfrsf13 // tumor necrosis factor (ligand) sup   | 6789329      |               | 3                           | 1                            | 0.0027076           | 0.0007948            | 0.0477096            | 0.142093             | 0.816306               | 0.468497               | 8.85E-13                         | 2.12E-06                         |
| 147 | NM 010703 // Lef1 // lymphoid enhancer binding factor 1 // 3 G3J3 61      | 6901380      |               | 2                           | 0                            | 0.0997992           | 0.0466652            | 0.0033829            | 0.90426              | 0.99987                | 0.999489               | 9.07E-13                         | 5.40E-14                         |
| 148 | NM 010304 // Gna15 // guanine nucleotide binding protein, alpha 15 // 8   | 6775472      |               | 0                           | 0                            | 0.736786            | 0.981813             | 0.67737              | 0.0571631            | 0.676891               | 0.992567               | 1.08E-12                         | 2.49E-09                         |
| 149 | XM 990117 // Rxra // retinoid X receptor alpha // 2 A3J2 17.0 cM // 2014  | 6875901      |               | 1                           | 0                            | 0.200563            | 0.644058             | 0.885963             | 0.0322425            | 0.572681               | 0.866395               | 1.44E-12                         | 0.00011768                       |
| 150 | NM 013710 // Fqd2 // FYVE, RhoGEF and PH domain containing 2 // 19        | 6849622      |               | 2                           | 1                            | 0.199926            | 0.0698197            | 0.0050888            | 0.004778             | 0.990788               | 0.99883                | 1.61E-12                         | 1.85E-21                         |
| 151 | NM 031376 // Pik3ap1 // phosphoinositide-3-kinase adaptor protein 1       | 6873133      |               | 3                           | 2                            | 0.0202289           | 0.0003455            | 0.220762             | 0.0002266            | 0.998616               | 0.83738                | 2.00E-12                         | 2.94E-18                         |
| 152 | NM 133221 // Stc24a6 // solute carrier family 24 (sodium/potassium/c      | 6933973      |               | 3                           | 0                            | 0.546702            | 0.0159327            | 0.0129952            | 0.0055624            | 0.99902                | 0.880476               | 2.35E-12                         | 1.04E-15                         |
| 153 | NM 015736 // Galnt3 // UDP-N-acetyl-alpha-D-galactosamine:polyep          | 6887337      |               | 3                           | 1                            | 0.620042            | 0.0167103            | 9.12E-09             | 0.104238             | 0.924417               | 0.852396               | 3.08E-12                         | 1.44E-16                         |
| 154 | NM 028749 // Npl // N-acetylneuraminate pyruvate lyase // 1 G2 // 741     | 6763146      |               | 3                           | 1                            | 0.0304618           | 0.0655201            | 0.0007402            | 0.0244784            | 0.829143               | 0.825002               | 3.70E-12                         | 1.11E-06                         |
| 155 | NM 183016 // Cdc42bpb // Cdc42 binding protein kinase beta // 12 F42      | 6803821      |               | 4                           | 3                            | 0.0023447           | 1.94E-05             | 1.22E-10             | 2.96E-06             | 0.632693               | 0.778043               | 3.80E-12                         | 4.53E-32                         |
| 156 | NM 010233 // Fn1 // fibronectin 1 // 1 C1-C5J1 36.1 cM // 14268 // AK51   | 6759621      |               | 2                           | 1                            | 0.943506            | 0.0018586            | 0.75564              | 0.0002776            | 0.991441               | 0.741068               | 3.82E-12                         | 4.74E-05                         |
| 157 | NM 126166 // Tlr3 // toll-like receptor 3 // 8 B2 // 142980               | 6982102      |               | 0                           | 0                            | 0.907714            | 0.732985             | 0.745422             | 0.331723             | 0.852978               | 0.542176               | 4.41E-12                         | 4.85E-25                         |
| 158 | NM 080448 // Srgap3 // SLIT-ROBO Rho GTPase activating protein 3          | 6956509      |               | 2                           | 0                            | 0.0110131           | 0.162468             | 0.823326             | 0.034761             | 0.175087               | 0.953871               | 4.64E-12                         | 8.18E-11                         |
| 159 | NM 008528 // Blink // B-cell linker // 19 C3J19 31.0 cM // 17060 // AK0   | 6873111      |               | 1                           | 1                            | 0.526092            | 0.0002373            | 0.187623             | 0.0924298            | 0.882716               | 0.937928               | 5.47E-12                         | 2.71E-10                         |
| 160 | NM 175181 // 2600010E01Rik // RIKEN cDNA 2600010E01 gene // 212           | 6889197      |               | 2                           | 0                            | 0.0650541           | 0.047913             | 0.513575             | 0.0103357            | 0.767964               | 0.865867               | 6.23E-12                         | 1.16E-14                         |
| 161 | NM 017407 // Spag5 // sperm associated antigen 5 // 11 B5J11 44.95        | 6782691      |               | 1                           | 0                            | 0.0684361           | 0.027508             | 0.551579             | 0.076701             | 0.999634               | 0.421019               | 6.42E-12                         | 7.65E-09                         |
| 162 | NM 009333 // Tcf7l2 // transcription factor 7-like 2, T-cell specific, HM | 6870580      |               | 3                           | 0                            | 0.263496            | 0.0094932            | 0.0098694            | 0.0011678            | 0.97697                | 0.899899               | 6.46E-12                         | 1.15E-16                         |
| 163 | NM 023132 // Renbp // renin binding protein // X A7.3X 29.53 cM // 113    | 7017604      |               | 0                           | 0                            | 0.0757889           | 0.555189             | 0.426313             | 0.500863             | 0.975904               | 0.99183                | 7.15E-12                         | 2.03E-10                         |
| 164 | NM 021475 // Adamdec1 // ADAM-like, decysin 1 // 14 D1 // 58860 // 15     | 6825600      |               | 2                           | 0                            | 0.0695356           | 0.0031835            | 0.0052477            | 0.202115             | 0.962597               | 0.0502927              | 1.05E-11                         | 8.41E-16                         |
| 165 | NM 010071 // Dok2 // docking protein 2 // 14 D2-D3J14 39.0 cM // 134      | 6820113      |               | 4                           | 2                            | 0.0004076           | 0.0006989            | 0.0162168            | 0.0094636            | 0.92603                | 0.5397                 | 1.13E-11                         | 0.00015676                       |
| 166 | NM 007846 // Cd38 // CD38 antigen // 5 B3J5 28.0 cM // 12494 // AK1       | 6930383      |               | 3                           | 1                            | 0.000808            | 0.0833889            | 0.0333641            | 0.0136903            | 0.96322                | 0.935661               | 1.33E-11                         | 2.2E-05                          |
| 167 | XM 001000290 // Gm150 // gene model 150, (NCBI) // 5 F // 208908          | 6934262      |               | 3                           | 2                            | 0.0026479           | 0.937567             | 4.19E-08             | 7.01E-07             | 0.997365               | 0.999387               | 1.39E-11                         | 1.17E-05                         |
| 168 | NM 009185 // Stil // Scl/Tal1 interrupting locus // 4 D1 // 20460         | 6916483      |               | 1                           | 0                            | 0.752335            | 0.0039687            | 0.613065             | 0.2868               | 0.998661               | 0.99701                | 1.43E-11                         | 8.79E-05                         |
| 169 | NM 010567 // Inpp1 // inositol polyphosphate phosphatase-like 1 // 32     | 6969886      |               | 1                           | 0                            | 0.0374578           | 0.240882             | 0.252823             | 0.070865             | 0.953983               | 0.972745               | 1.50E-11                         | 8.64E-08                         |
| 170 | NM 019793 // Tspan3 // tetraspanin 3 // 9 C // 56434 // AF242591 // T10   | 6959825      |               | 0                           | 0                            | 0.495498            | 0.379261             | 0.825345             | 0.996584             | 0.775304               | 0.819476               | 1.53E-11                         | 0.0001374                        |
| 171 | XM 903338 // LOC630222 // similar to Interleukin-2 precursor (IL-2) // 16 | 6904309      |               | 0                           | 0                            | 0.641808            | 0.384488             | 0.356861             | 0.961858             | 0.958368               | 0.217572               | 1.58E-11                         | 0.00010119                       |
| 172 | NM 013612 // Slc11a1 // solute carrier family 11 (proton-coupled dival    | 6750546      |               | 3                           | 2                            | 0.164034            | 8.35E-07             | 0.0002412            | 0.0348006            | 0.955049               | 0.771423               | 1.72E-11                         | 9.15E-31                         |
| 173 | NM 013737 // Pla2g7 // phospholipase A2, group VII (platelet-activat      | 6850534      |               | 3                           | 1                            | 0.0037431           | 0.0003181            | 0.0261846            | 0.592068             | 0.590442               | 0.847008               | 1.76E-11                         | 6.82E-14                         |
| 174 | NM 911132 // LOC635918 // similar to glucosaminyl (N-acetyl) transfe      | 6871874      |               | 0                           | 0                            | 0.757326            | 0.462006             | 0.89618              | 0.412394             | 0.926874               | 0.971112               | 1.76E-11                         | 2.65E-09                         |
| 175 | NM 133185 // Rogdi // roqdi homolog (Drosophila) // 16 A1J16 3.3 cM // 14 | 6843680      |               | 1                           | 0                            | 0.141349            | 0.0692976            | 0.0706415            | 0.0079296            | 0.996521               | 0.969164               | 1.81E-11                         | 9.46E-12                         |
| 176 | NM 007575 // C2ta // class II transactivator // 16 B1 // 12265 // XM 9    | 6839340      |               | 1                           | 0                            | 0.0780402           | 0.0154076            | 0.0614994            | 0.153188             | 0.999067               | 0.995384               | 1.82E-11                         | 7.64E-21                         |
| 177 | NM 013866 // Zfp385 // zinc finger protein 385 // 15 F3 // 29813          | 6838808      |               | 3                           | 1                            | 0.0008734           | 0.0242476            | 0.14829              | 0.0071522            | 0.975523               | 0.280583               | 1.97E-11                         | 2.38E-12                         |
| 178 | NM 009004 // Kif20a // kinesin family member 20A // 18 B1J18 17.0 cM      | 6859953      |               | 2                           | 0                            | 0.789057            | 0.001682             | 0.669678             | 0.0230449            | 0.999975               | 0.997824               | 2.00E-11                         | 6.05E-12                         |
| 179 | NM 010612 // Kdr // kinase insert domain protein receptor // 5 C3.3J5     | 6939241      |               | 1                           | 0                            | 0.180317            | 0.241824             | 0.997819             | 0.0027968            | 0.999993               | 0.994977               | 2.63E-11                         | 2.16E-06                         |
| 180 | NM 010186 // Fcgr1 // Fc receptor, IgG, high affinity // 3 F2.1J3 45.2    | 6907262      |               | 4                           | 0                            | 0.0418203           | 0.0163604            | 0.026965             | 0.0030235            | 0.678862               | 0.947431               | 3.22E-11                         | 1.04E-05                         |
| 181 | NM 008984 // Ptpm // protein tyrosine phosphatase, receptor type, M       | 6856756      |               | 3                           | 2                            | 0.0768984           | 8.60E-05             | 0.0234164            | 8.80E-05             | 0.981948               | 0.981333               | 3.56E-11                         | 4.89E-07                         |
| 182 | NM 487967 // Clec2f // C-type lectin domain family 2, member f // 6 F3    | 6950115      |               | 0                           | 0                            | 0.394114            | 0.128265             | 0.97722              | 0.878932             | 0.173606               | 0.922892               | 3.63E-11                         | 4.01E-08                         |
| 183 | NM 015753 // Zfx1b // zinc finger homeobox 1b // 2 C1 // 24136 // N13     | 6886356      |               | 2                           | 0                            | 0.0202895           | 0.0115824            | 0.185955             | 0.718224             | 0.903494               | 0.534624               | 3.90E-11                         | 2.75E-20                         |
| 184 | NM 027290 // Mcm10 // minichromosome maintenance deficient 10 // 22       | 6884441      |               | 2                           | 0                            | 0.647035            | 0.0029846            | 0.242878             | 0.0121774            | 0.999485               | 0.734001               | 3.98E-11                         | 1.90E-08                         |
| 185 | NM 905874 // LOC631361 // similar to T-cell receptor gamma chain C        | 6805106      |               | 7                           | 0                            | 0.808847            | 0.728264             | 0.702134             | 0.988821             | 0.755465               | 0.584423               | 4.23E-11                         | 0.00015385                       |
| 186 | NM 013542 // Gzmb // granzyme B // 14 D3J14 20.5 cM // 14939              | 6824880      |               | 2                           | 0                            | 0.225355            | 0.0052904            | 0.499649             | 0.0110681            | 0.755621               | 0.376832               | 6.33E-11                         | 4.82E-07                         |
| 187 | NM 011146 // Pparg // peroxisome proliferator activated receptor gam      | 6949202      |               | 1                           | 0                            | 0.245756            | 0.0048417            | 0.052568             | 0.0524844            | 0.994634               | 0.934755               | 6.81E-11                         | 3.69E-09                         |
| 188 | XM 001002757 // Nfam1 // Nfat activating molecule with ITAM motif 1       | 6837415      |               | 3                           | 0                            | 0.0018394           | 0.275764             | 0.0303097            | 0.0025194            | 0.79099                | 0.994378               | 6.95E-11                         | 0.00031461                       |
| 189 | NM 016707 // Bcl11a // B-cell CLL/lymphoma 11A (zinc finger protein)      | 6779432      |               | 2                           | 0                            | 0.0089637           | 0.301342             | 0.223827             | 0.0151175            | 0.926861               | 0.934441               | 7.91E-11                         | 2.89E-13                         |
| 190 | NM 145491 // Rhoq // ras homolog gene family, member Q // 17 E4J1         | 6852845      |               | 2                           | 0                            | 0.0277939           | 0.350497             | 0.455223             | 0.019049             | 0.744142               | 0.853942               | 1.00E-10                         | 5.41E-14                         |
| 191 | NM 024469 // Bhlhb3 // basic helix-loop-helix domain containing, clas     | 6958256      |               | 0                           | 0                            | 0.18545             | 0.648797             | 0.243894             | 0.598588             | 0.99439                | 0.914296               | 1.00E-10                         | 0.00030374                       |
| 192 | XR 003523 // LOC545866 // similar to RNA binding motif protein 17 // 19   | 6884709      |               | 1                           | 1                            | 0.124663            | 0.0003726            | 0.152897             | 0.456932             | 0.884377               | 0.990117               | 1.06E-10                         | 1.55E-10                         |
| 193 | NM 007547 // Sirpa // signal-regulatory protein alpha // 2 F3J2 73.1 cM   | 6881139      |               | 0                           | 0                            | 0.10752             | 0.904056             | 0.195988             | 0.645144             | 0.906004               | 0.984513               | 1.09E-10                         | 9.00E-20                         |
| 194 | NM 130859 // Card10 // caspase recruitment domain family, member          | 6830746      |               | 2                           | 1                            | 0.07879             | 0.0139246            | 0.766158             | 1.33E-06             | 0.964258               | 0.377521               | 1.14E-10                         | 3.00E-06                         |
| 195 | NM 010705 // Lgals3 // lectin, galactose binding, soluble 3 // 14 C1 // 8 | 6818696      |               | 1                           | 0                            | 0.850487            | 0.0713303            | 0.0110107            | 0.540085             | 0.948321               | 0.627317               | 1.29E-10                         | 1.87E-14                         |
| 196 | NM 0                                                                      |              |               |                             |                              |                     |                      |                      |                      |                        |                        |                                  |                                  |

|     | A                                                                             | B            | C             | D                           | E                            | F                   | G                    | H                    | I                    | J                      | K                      | L                                | M                                |
|-----|-------------------------------------------------------------------------------|--------------|---------------|-----------------------------|------------------------------|---------------------|----------------------|----------------------|----------------------|------------------------|------------------------|----------------------------------|----------------------------------|
| 1   | Gene Description                                                              | # Probe Sets | Transcript ID | Number of cell types p<0.05 | Number of cell types p<0.001 | p value wt v th CD4 | P value wt vs th CD4 | p value wt vs th CD8 | p value wt vs th CD8 | p value wt vs th CD8SP | p value wt vs th CD4SP | P-value WT naïve v WT memory CD4 | P-value WT naïve v WT memory CD8 |
| 203 | NM 008088 // Gas7 // growth arrest specific 7 // 11 B3 // 14457 // XM 16      | 6781885      | 0             | 0                           | 0.958778                     | 0.200806            | 0.990599             | 0.557923             | 0.994454             | 0.95636                | 2.32E-10               | 3.06E-11                         |                                  |
| 204 | NM 172900 // Siglec7 // sialic acid binding Ig-like lectin G // 7 B3 // 24 16 | 6960140      | 3             | 0                           | 0.0732904                    | <b>0.0436334</b>    | <b>0.0185481</b>     | <b>0.0055906</b>     | 0.990751             | 0.971415               | 2.39E-10               | 1.60E-10                         |                                  |
| 205 | NM 007599 // Capping // capping protein (actin filament), gelsolin-like // 9  | 6946993      | 0             | 0                           | 0.587148                     | 0.785043            | 0.997735             | 0.355891             | 0.789898             | 0.999539               | 2.98E-10               | 7.33E-07                         |                                  |
| 206 | NM 986015 // Tmem163 // transmembrane protein 163 // 1 E3 // 7216 11          | 6761964      | 1             | 0                           | 0.904324                     | 0.0516241           | 0.255932             | <b>0.0101186</b>     | 0.994419             | 0.512417               | 3.08E-10               | 1.20E-14                         |                                  |
| 207 | NM 027810 // Bbs7 // Bardet-Biedl syndrome 7 // 3 B // 71492 // NM 12         | 6904300      | 2             | 0                           | 0.858072                     | <b>0.0050781</b>    | 0.633768             | <b>0.0482439</b>     | 0.992429             | 0.995213               | 3.08E-10               | 2.12E-15                         |                                  |
| 208 | NM 177686 // Clec12a // C-type lectin domain family 12, member a // 10        | 6950137      | 1             | 1                           | 0.159209                     | <b>0.002407</b>     | 0.156531             | 0.767062             | 0.658356             | 0.767777               | 3.18E-10               | 3.53E-17                         |                                  |
| 209 | NM 026082 // Dock7 // dedicator of cytokinesis 7 // 4 C6 // 67299 // B 36     | 6923694      | 1             | 0                           | 0.0946116                    | 0.0589488           | 0.0750527            | <b>0.0072858</b>     | 0.983448             | 0.324563               | 6.36E-10               | 4.38E-21                         |                                  |
| 210 | NM 009917 // Cor5 // chemokine (C-C motif) receptor 5 // 9 72.0 cM // 4       | 6993154      | 0             | 0                           | 0.647902                     | 0.0941468           | 0.958936             | 0.507434             | 0.832815             | 0.947186               | 3.72E-10               | 6.10E-08                         |                                  |
| 211 | NM 146208 // Neil3 // nei like 3 (E. coli) // 8 B1.3 // 234258 // NM 024 14   | 6982550      | 1             | 0                           | 0.993455                     | <b>0.0235519</b>    | 0.821426             | 0.567473             | 0.996063             | 0.9749                 | 3.76E-10               | 4.97E-07                         |                                  |
| 212 | NM 892197 // LOC627525 // similar to protein tyrosine phosphatase 17          | 6888696      | 3             | 2                           | <b>0.001098</b>              | 0.0063688           | 0.13226              | <b>8.17E-05</b>      | 0.654229             | 0.825822               | 4.57E-10               | 5.15E-22                         |                                  |
| 213 | NM 019467 // Aif1 // allograft inflammatory factor 1 // 17 B1 // 19.05 8      | 6855084      | 1             | 0                           | 0.742226                     | <b>0.0024844</b>    | 0.814166             | 0.696998             | 0.525169             | 0.992875               | 4.74E-10               | 7.28E-18                         |                                  |
| 214 | NM 007602 // Capn5 // calpain 5 // 7 E1 // 12337 // BC014767 // Cap 18        | 6969640      | 1             | 1                           | 0.142357                     | 0.533906            | 0.748811             | <b>0.001424</b>      | 0.971951             | 0.405737               | 4.92E-10               | 4.20E-06                         |                                  |
| 215 | NM 016704 // C6 // complement component 6 // 15 A1 // 15 3.0 cM // 12 16      | 6828403      | 2             | 2                           | 0.178143                     | <b>0.38E-05</b>     | <b>0.001083</b>      | 0.690885             | 0.895964             | 0.971878               | 5.13E-10               | 3.72E-17                         |                                  |
| 216 | NM 144538 // Rab31 // RAB3A interacting protein (rab31)-like 1 // 19 13       | 6868017      | 0             | 0                           | 0.562286                     | 0.0950776           | 0.969676             | 0.0857001            | 0.872991             | 0.924648               | 5.14E-10               | 1.84E-06                         |                                  |
| 217 | NM 009848 // Entpd1 // ectonucleoside triphosphate diphosphohydrol 11         | 6869635      | 1             | 0                           | 0.496951                     | 0.720694            | <b>0.0186916</b>     | 0.458105             | 0.765599             | 0.998259               | 6.57E-10               | 2.36E-11                         |                                  |
| 218 | NM 357154 // LOC383613 // similar to suppressor of initiator codon m 17       | 6763972      | 3             | 1                           | 0.207308                     | <b>0.001724</b>     | <b>0.027536</b>      | <b>8.39E-06</b>      | 0.991616             | 0.957859               | 6.64E-10               | 4.34E-05                         |                                  |
| 219 | NM 144831 // Dhx8 // DEAH (Asp-Glu-Ala-His) box polypeptide 8 // 14           | 6784290      | 1             | 0                           | 0.955309                     | 0.625979            | 0.657386             | <b>0.024972</b>      | 0.894388             | 0.646627               | 6.91E-10               | 1.16E-10                         |                                  |
| 220 | NM 194344 // Sh3c1 // SH3 domain and tetrapeptide repeats 1 // 19             | 6937442      | 2             | 1                           | 0.0846438                    | 0.441989            | <b>0.003732</b>      | <b>3.60E-05</b>      | 0.984102             | 0.862429               | 7.26E-10               | 1.59E-05                         |                                  |
| 221 | NM 009689 // Birc5 // baculoviral IAP repeat-containing 5 // 11 E2 // 19      | 6753037      | 1             | 1                           | 0.467963                     | <b>0.001602</b>     | 0.841429             | 0.33671              | 0.998537             | 0.511848               | 7.43E-10               | 3.38E-12                         |                                  |
| 222 | NM 027758 // Tbc1c9 // TBC1 domain family, member 9 // 8 C3 // 713 22         | 6977648      | 1             | 0                           | 0.290924                     | 0.800047            | 0.561102             | <b>0.0490662</b>     | 0.950275             | 0.299129               | 7.54E-10               | 8.37E-29                         |                                  |
| 223 | NM 029478 // Tmem49 // transmembrane protein 49 // 11 C // 75909 11           | 6790508      | 1             | 0                           | 0.0516815                    | <b>0.00295</b>      | 0.805226             | 0.448259             | 0.636303             | 0.58301                | 7.82E-10               | 0.00014484                       |                                  |
| 224 | NM 010653 // Klrc2 // killer cell lectin-like receptor subfamily C, mem 5     | 6957421      | 1             | 1                           | 0.227882                     | 0.201242            | 0.224311             | 0.295033             | 0.950901             | <b>0.0005664</b>       | 7.85E-10               | 4.80E-08                         |                                  |
| 225 | NM 010229 // Ftk3 // FMS-like tyrosine kinase 3 // 5 G3 // 82.0 cM // 14 26   | 6943142      | 1             | 0                           | 0.831299                     | 0.66123             | <b>0.0029101</b>     | 0.244798             | 0.760181             | 0.99988                | 8.04E-10               | 0                                |                                  |
| 226 | NM 177713 // 9830130M13Rik // RIKEN cDNA 9830130M13 gene // 17                | 6816025      | 1             | 0                           | 0.568257                     | 0.0866083           | 0.986967             | <b>0.0038232</b>     | 0.20664              | 0.773898               | 8.38E-10               | 2.01E-07                         |                                  |
| 227 | NM 009275 // Srpb // signal recognition particle receptor, B subunit // 15    | 6989397      | 2             | 0                           | 0.274208                     | <b>0.0025307</b>    | 0.112118             | 0.018407             | 0.621677             | 0.969236               | 8.41E-10               | 5.61E-25                         |                                  |
| 228 | NM 133198 // Pvgl // liver glycogen phosphorylase // 12 C2 // 12 30.0 c 20    | 6801506      | 2             | 0                           | 0.223332                     | <b>5.04E-07</b>     | 0.308693             | <b>0.0021732</b>     | 0.87803              | 0.947206               | 8.46E-10               | 1.62E-07                         |                                  |
| 229 | NM 010208 // Fgr // Gardner-Rasheed feline sarcoma viral (Fgr) onco 14        | 6917549      | 2             | 0                           | 0.2097                       | 0.309645            | <b>0.0337974</b>     | <b>0.0407962</b>     | 0.983549             | 0.904903               | 8.50E-10               | 3.90E-09                         |                                  |
| 230 | NM 011369 // Shcbp1 // Shc SH2-domain binding protein 1 // 8 A1.2 // 13       | 6980158      | 1             | 0                           | 0.956831                     | <b>0.0120019</b>    | 0.0738787            | 0.265212             | 0.251167             | 0.744183               | 9.17E-10               | 5.32E-06                         |                                  |
| 231 | NM 013515 // Stom // stomatin // 2 B-C12 24.0 cM // 13830 12                  | 6886630      | 1             | 0                           | 0.790255                     | 0.290585            | 0.373562             | 0.13355              | 0.816598             | 0.253974               | 1.04E-09               | 1.08E-14                         |                                  |
| 232 | NM 989161 // LOC671796 // hypothetical protein LOC671796 // 67 16             | 6900994      | 0             | 0                           | 0.159164                     | 0.106641            | 0.403876             | <b>0.0090545</b>     | 0.913549             | 0.923188               | 1.05E-09               | 7.83E-07                         |                                  |
| 233 | NM 008903 // Ppap2a // phosphatidic acid phosphatase 2a // 13 D2.2 11         | 6810299      | 2             | 0                           | 0.305635                     | <b>0.0213926</b>    | 0.306101             | <b>0.0018218</b>     | 0.773683             | 0.661119               | 1.09E-09               | 9.43E-18                         |                                  |
| 234 | NM 001003962 // LOC673056 // similar to Baculoviral IAP repeat-con 11         | 6815535      | 0             | 0                           | 0.884985                     | 0.161712            | 0.863374             | 0.078333             | 0.445118             | 0.137119               | 1.14E-09               | 5.68E-10                         |                                  |
| 235 | NM 029394 // Snx24 // sorting nexin 24 // 18 D1 // 69226 // AK0176 13         | 6886029      | 2             | 0                           | <b>0.0172004</b>             | 0.296106            | <b>0.0058551</b>     | 0.745323             | 0.985718             | 0.964354               | 1.15E-09               | 5.98E-07                         |                                  |
| 236 | NM 974248 // Klri2 // killer cell lectin-like receptor family I member 2 // 7 | 6957428      | 0             | 0                           | 0.745971                     | 0.273569            | 0.247287             | 0.327663             | 0.401382             | 0.899398               | 1.33E-09               | 3.58E-08                         |                                  |
| 237 | NM 146061 // Arhgap8 // Rho GTPase activating protein 8 // 15 E // 11 11      | 6832321      | 0             | 0                           | 0.0739209                    | 0.353677            | 0.550484             | 0.0893989            | 0.993132             | 0.56637                | 1.45E-09               | 2.25E-11                         |                                  |
| 238 | NM 001039150 // Cd44 // CD44 antigen // 2 E2 // 56.0 cM // 12505 // 13        | 6889258      | 1             | 0                           | 0.0683225                    | 0.278255            | 0.795578             | 0.0531878            | 0.958071             | 0.397417               | 1.48E-09               | 3.16E-10                         |                                  |
| 239 | NM 011352 // Sema7a // sema domain, immunoglobulin domain (Ig), 15            | 6989438      | 2             | 2                           | 0.106419                     | <b>0.0007779</b>    | 0.11323              | <b>0.0001122</b>     | 0.553097             | 0.827743               | 1.54E-09               | 1.92E-10                         |                                  |
| 240 | NM 008587 // Mertk // c-mer proto-oncogene tyrosine kinase // 2 F1 // 21      | 6881087      | 3             | 1                           | 0.457598                     | <b>0.000168</b>     | <b>0.0098912</b>     | <b>0.0018009</b>     | 0.999913             | 0.98589                | 1.94E-09               | 2.45E-12                         |                                  |
| 241 | NM 054054 // Brdt // bromodomain, testis-specific // 5 E5 // 114642 // 19     | 6933251      | 2             | 1                           | <b>0.001386</b>              | <b>0.0652291</b>    | <b>0.0004564</b>     | 0.3103               | 0.996075             | 0.99993                | 1.98E-09               | 0.0009583                        |                                  |
| 242 | NM 011578 // Tgfb3 // transforming growth factor, beta receptor III // 18     | 6940841      | 1             | 1                           | 0.135101                     | <b>5.77E-05</b>     | 0.881369             | 0.925943             | 0.627743             | 0.871823               | 2.19E-09               | 5.29E-05                         |                                  |
| 243 | NM 986629 // Itgad // integrin, alpha D // 7 F3 // 381924 // NM 02133 28      | 6964382      | 0             | 0                           | 0.607762                     | 0.995075            | 0.628049             | 0.422906             | 0.987345             | 0.989061               | 2.66E-09               | 6.26E-43                         |                                  |
| 244 | NM 007548 // Prdm1 // PR domain containing 1, with ZNF domain // 14           | 6773655      | 0             | 0                           | 0.194587                     | 0.0871177           | 0.871806             | 0.78173              | 0.989757             | 0.98612                | 2.73E-09               | 1.59E-05                         |                                  |
| 245 | NM 053099 // Setbp1 // SET binding protein 1 // 18 E3 // 240427 // A 10       | 6886862      | 0             | 0                           | 0.439557                     | 0.35766             | 0.643767             | 0.291012             | 0.96402              | 0.819705               | 3.10E-09               | 7.68E-05                         |                                  |
| 246 | NM 030249 // Ctnbp2 // CTTNBP2 N-terminal like // 3 F2.2 // 8028 14           | 6907888      | 0             | 0                           | 0.242528                     | 0.269923            | 0.191014             | 0.621281             | 0.881746             | 0.926953               | 3.30E-09               | 5.56E-11                         |                                  |
| 247 | NM 001035531 // Adrbk2 // adrenergic receptor kinase, beta 2 // 5 F5 18       | 6941146      | 1             | 0                           | 0.916826                     | 0.994978            | <b>0.0144194</b>     | 0.637177             | 0.80395              | 0.715237               | 3.90E-09               | 5.74E-38                         |                                  |
| 248 | NM 988271 // LOC626703 // hypothetical LOC626703 // 6 G1 // 6267 7            | 6957679      | 3             | 0                           | <b>0.0010889</b>             | <b>0.0372855</b>    | <b>0.0347552</b>     | 0.630487             | <b>0.0567214</b>     | 0.991875               | 3.90E-09               | 4.57E-11                         |                                  |
| 249 | NM 133809 // Kmo // kynurenine 3-monooxygenase (kynurenine 3-hy 19            | 6755378      | 0             | 0                           | 0.408514                     | 0.975627            | 0.522416             | 0.147415             | 0.984479             | 0.998423               | 4.00E-09               | 6.42E-14                         |                                  |
| 250 | NM 139138 // Emr4 // EGF-like module containing, mucin-like, hormo 17         | 6851186      | 1             | 0                           | 0.14269                      | <b>0.0327035</b>    | 0.287358             | 0.794281             | 0.990394             | 0.896706               | 4.28E-09               | 9.52E-22                         |                                  |
| 251 | NM 080555 // Ppap2b // phosphatidic acid phosphatase type 2B // 4 8           | 6916023      | 1             | 1                           | <b>0.0001973</b>             | 0.0823957           | 0.094227             | 0.349406             | 0.253466             | 0.377552               | 4.42E-09               | 0.00066042                       |                                  |
| 252 | NM 009915 // Cor2 // chemokine (C-C motif) receptor 2 // 9 F9 71.9 c 4        | 6993153      | 0             | 0                           | 0.174835                     | 0.481603            | 0.509098             | 0.260985             | 0.669269             | 0.513395               | 4.49E-09               | 6.99E-05                         |                                  |
| 253 | NM 011216 // Ptpro // protein tyrosine phosphatase, receptor type, O 32       | 6950539      | 0             | 0                           | 0.992264                     | 0.671914            | 0.89669              | 0.666387             | 0.868022             | 0.989429               | 4.97E-09               | 3.91E-14                         |                                  |
| 254 | NM 019753 // Cdh17 // cadherin 17 // 4 A2 // 12557 20                         | 6911729      | 1             | 0                           | 0.472785                     | 0.142383            | 0.595863             | <b>0.0014745</b>     | 0.993177             | 0.674558               | 5.25E-09               | 1.22E-05                         |                                  |
| 255 | NM 025730 // Lrrk2 // leucine-rich repeat kinase 2 // 15 F1 // 66725 // 48    | 6832713      | 3             | 1                           | <b>0.0464883</b>             | <b>0.0228264</b>    | <b>0.0002728</b>     | 0.0718531            | 0.999914             | 0.995776               | 5.28E-09               | 3.72E-33                         |                                  |
| 256 | NM 144549 // Trib1 // tribbles homolog 1 (Drosophila) // 15 D1 // 2117 18     | 6830770      | 1             | 0                           | 0.0633948                    | 0.531349            | 0.974889             | 0.0413616            | 0.858316             | 0.820891               | 5.41E-09               | 3.93E-14                         |                                  |
| 257 | NM 207530 // Osbp1a // oxysterol binding protein-like 1A // 18 A2 // 6 37     | 6883467      | 4             | 1                           | <b>0.0142533</b>             | <b>0.0001024</b>    | <b>0.0425186</b>     | <b>0.0042277</b>     | 0.999987             | 0.991067               | 5.68E-09               | 0.00061917                       |                                  |
| 258 | NM 010872 // Birc1b // baculoviral IAP repeat-containing 1b // 13 D1 // 15    | 6815522      | 1             | 0                           | 0.137493                     | <b>0.045431</b>     | 0.15079              | 0.602588             | 0.831882             | 0.913084               | 5.90E-09               | 2.69E-06                         |                                  |
| 259 | NM 013484 // C2 // complement component 2 (within H-2S) // 17 B1 // 17        | 6850652      | 1             | 0                           | 0.394845                     | 0.969267            | 0.295377             | <b>0.0410734</b>     | 0.713794             | 0.419703               | 6.46E-09               | 0.00029201                       |                                  |
| 260 | NM 891957 // Cdkn3 // cyclin-dependent kinase inhibitor 3 // 14 C1 // 10      | 6818647      | 1             | 0                           | 0.206224                     | <b>0.0128032</b>    | 0.860434             | 0.0562001            | 0.964657             | 0.98025                | 6.93E-09               | 5.43E-12                         |                                  |
| 261 | NM 982884 // LOC666300 // similar to thymosin, beta 10 // 19 A // 666 15      | 6876543      | 1             | 0                           | 0.355464                     | 0.309685            | 0.287219             | <b>0.0477367</b>     | 0.995634             | 0.996444               | 7.91E-09               | 1.51E-21                         |                                  |
| 262 | NM 008505 // Lmo2 // LIM domain only 2 // 2 E2 // 60.0 cM // 16909 // 8       | 6879637      | 0             | 0                           | 0.0602338                    | 0.395419            | 0.594352             | 0.310697             | 0.997291             | 0.839408               | 8.34E-09               |                                  |                                  |

|     | A                                                                            | B            | C             | D                           | E                            | F                   | G                    | H                    | I                    | J                      | K                      | L                                | M                                |
|-----|------------------------------------------------------------------------------|--------------|---------------|-----------------------------|------------------------------|---------------------|----------------------|----------------------|----------------------|------------------------|------------------------|----------------------------------|----------------------------------|
| 1   | Gene Description                                                             | # Probe Sets | Transcript ID | Number of cell types p<0.05 | Number of cell types p<0.001 | p value wt v th CD4 | P value wt vs th CD4 | p value wt vs th CD8 | p value wt vs th CD8 | p value wt vs th CD8SP | p value wt vs th CD4SP | P-value WT naïve v WT memory CD4 | P-value WT naïve v WT memory CD8 |
| 270 | NM 172578 // C79407 // expressed sequence C79407 // 12 C1 // 217             | 18           | 6801335       | 1                           | 0                            | 0.24907             | 0.0104123            | 0.377806             | 0.191983             | 0.997181               | 0.999911               | 1.09E-08                         | 2.06E-05                         |
| 271 | NM 175088 // Mdfic // MyoD family inhibitor domain containing // 6 A1        | 8            | 6944293       | 1                           | 0                            | 0.317706            | 0.941624             | 0.764597             | 0.0190324            | 0.306998               | 0.713366               | 1.24E-08                         | 2.32E-09                         |
| 272 | XM 920821 // Ppfbp1 // PTPRF interacting protein, binding protein 1          | 30           | 6951118       | 1                           | 0                            | 0.755318            | 0.134425             | 0.0442067            | 0.0561763            | 0.989446               | 0.766949               | 1.25E-08                         | 0.00021242                       |
| 273 | NM 008337 // Ifnq // interferon gamma // 10 D2110 67.0 cM // 15978           | 5            | 6771052       | 0                           | 0                            | 0.506075            | 0.107592             | 0.0761136            | 0.136946             | 0.57624                | 0.92522                | 1.29E-08                         | 1.45E-06                         |
| 274 | NM 134250 // Hcvr2 // hepatitis A virus cellular receptor 2 // 11 B1.1       | 11           | 6780551       | 0                           | 0                            | 0.383644            | 0.88648              | 0.224724             | 0.389806             | 0.204036               | 0.429682               | 1.47E-08                         | 3.73E-24                         |
| 275 | NM 172488 // 9030625A04Rik // RIKEN cDNA 9030625A04 gene // 18               | 8            | 6826116       | 0                           | 0                            | 0.169843            | 0.059797             | 0.0721224            | 0.279031             | 0.211722               | 0.887787               | 1.48E-08                         | 4.34E-17                         |
| 276 | NM 181547 // Nostrin // nitric oxide synthase trafficker // 2 C2 // 3294     | 15           | 6877901       | 3                           | 0                            | 0.0275379           | 0.048719             | 0.0055929            | 0.684342             | 0.134328               | 0.547083               | 1.50E-08                         | 7.02E-10                         |
| 277 | NM 012057 // Irf5 // interferon regulatory factor 5 // 6 A3.316 7.1 cM // 11 | 11           | 6945011       | 1                           | 1                            | 0.48642             | 0.0008979            | 0.654803             | 0.373851             | 0.973492               | 0.997344               | 1.52E-08                         | 2.37E-09                         |
| 278 | NM 133721 // Itga9 // integrin alpha 9 // 9 F319 67.0 cM // 104099 // A28    | 28           | 6992855       | 4                           | 2                            | 0.001191            | 0.0045358            | 0.0003231            | 0.0001679            | 0.514082               | 0.898803               | 1.53E-08                         | 9.50E-08                         |
| 279 | NM 207245 // BC066107 // cDNA sequence BC066107 // 17 B1 // 2407             | 7            | 6854907       | 0                           | 0                            | 0.491024            | 0.72886              | 0.878453             | 0.278494             | 0.979254               | 0.765697               | 1.81E-08                         | 2.97E-07                         |
| 280 | NM 983668 // LOC675618 // similar to ribosomal protein L31 // 675            | 8            | 6998919       | 1                           | 1                            | 0.0700539           | 0.854022             | 0.592602             | 2.84E-05             | 0.996478               | 0.848882               | 1.93E-08                         | 6.33E-07                         |
| 281 | NM 021451 // Pmaip1 // phorbol-12-myristate-13-acetate-induced pro           | 7            | 6861662       | 1                           | 0                            | 0.264225            | 0.452303             | 0.329532             | 0.0103802            | 0.957008               | 0.816837               | 2.12E-08                         | 6.16E-10                         |
| 282 | NM 011820 // Ggt1a1 // gamma-glutamyltransferase-like activity 1 // 118      | 8            | 6786868       | 0                           | 0                            | 0.0656955           | 0.0588271            | 0.813426             | 0.190252             | 0.95677                | 0.938634               | 2.34E-08                         | 0.00023413                       |
| 283 | NM 175384 // Cdc2a // cell division cycle associated 2 // 14 D1 // 1084      | 14           | 6825544       | 2                           | 0                            | 0.0015082           | 0.0030175            | 0.14689              | 0.249822             | 0.999844               | 0.985112               | 2.42E-08                         | 6.09E-06                         |
| 284 | NM 001000500 // Cd244 // CD244 natural killer cell receptor 2B4 // 1         | 10           | 6755189       | 0                           | 0                            | 0.691086            | 0.99867              | 0.828468             | 0.192175             | 0.895828               | 0.408799               | 2.69E-08                         | 2.03E-18                         |
| 285 | NM 010188 // Fcgr3 // Fc receptor, IgG, low affinity III // 1 H31 92.3 c     | 6            | 6764040       | 1                           | 0                            | 0.220739            | 0.0405213            | 0.221995             | 0.81563              | 0.941702               | 0.284291               | 2.80E-08                         | 1.25E-07                         |
| 286 | NM 013584 // Lifr // leukemia inhibitory factor receptor // 15 A115 4.6      | 21           | 6828522       | 1                           | 0                            | 0.572433            | 0.0209196            | 0.634198             | 0.124009             | 0.999767               | 0.967044               | 2.82E-08                         | 1.67E-08                         |
| 287 | NM 008175 // Grn // granulins // 11 D11 60.0 cM // 14824                     | 16           | 6784345       | 1                           | 0                            | 0.899021            | 0.0940463            | 0.0441412            | 0.760131             | 0.915236               | 0.773287               | 2.85E-08                         | 5.73E-11                         |
| 288 | NM 022420 // Gprc5b // G protein-coupled receptor, family C, group 5         | 8            | 6970857       | 0                           | 0                            | 0.342292            | 0.488012             | 0.516837             | 0.165961             | 0.846652               | 0.394897               | 2.88E-08                         | 7.25E-07                         |
| 289 | NM 024124 // Hdac9 // histone deacetylase 9 // 12 A3 // 79221 // AK1         | 12           | 6800020       | 2                           | 0                            | 0.0300861           | 0.311517             | 0.0386505            | 0.080619             | 0.673868               | 0.978736               | 2.88E-08                         | 1.97E-11                         |
| 290 | NM 152803 // Hpsc // heparanase // 5 E4 // 15442 // AK087283 // Hp           | 14           | 6940363       | 2                           | 0                            | 0.4979              | 0.0096244            | 0.342231             | 0.0286106            | 0.997963               | 0.951877               | 2.97E-08                         | 2.48E-08                         |
| 291 | NM 134471 // Kif2c // kinesin family member 2C // 4 D2.1 // 73804 //         | 14           | 6924834       | 0                           | 0                            | 0.349274            | 0.123869             | 0.314781             | 0.187393             | 0.992049               | 0.989912               | 3.17E-08                         | 3.16E-06                         |
| 292 | NM 181588 // 2310016A09Rik // RIKEN cDNA 2310016A09 gene // 17               | 2            | 6829549       | 2                           | 0                            | 0.129794            | 0.029581             | 0.164015             | 0.0037358            | 0.855651               | 0.92561                | 3.81E-08                         | 2.79E-05                         |
| 293 | NM 011269 // Rhag // Rhesus blood group-associated A glycoprotein            | 12           | 6850412       | 3                           | 0                            | 0.0180752           | 0.003342             | 0.185555             | 0.0021735            | 0.890333               | 0.490652               | 4.04E-08                         | 9.57E-06                         |
| 294 | NM 009500 // Vav2 // Vav2 oncogene // 2 A312 15.3 cM // 22325 // B           | 27           | 6885530       | 0                           | 0                            | 0.0478507           | 0.376982             | 0.244685             | 0.0594184            | 0.99096                | 0.90034                | 4.19E-08                         | 1.74E-17                         |
| 295 | NM 172723 // Centa1 // centaurin, alpha 1 // 5 G2 // 231821 // AK076         | 11           | 6942669       | 0                           | 0                            | 0.0696818           | 0.342989             | 0.334738             | 0.101129             | 0.748938               | 0.722387               | 4.52E-08                         | 5.05E-08                         |
| 296 | NM 177388 // Slc41a2 // solute carrier family 41, member 2 // 10 C1 //       | 12           | 6755559       | 0                           | 0                            | 0.236407            | 0.590411             | 0.971762             | 0.212145             | 0.979368               | 0.829141               | 4.79E-08                         | 1.64E-12                         |
| 297 | NM 010194 // Fes // feline sarcoma oncogene // 7 D217 39.0 cM // 14          | 21           | 6968780       | 1                           | 0                            | 0.717447            | 0.137338             | 0.278492             | 0.0133327            | 0.977293               | 0.99466                | 5.11E-08                         | 6.60E-15                         |
| 298 | NM 176841 // A430106J12Rik // RIKEN cDNA A430106J12 gene // 114              | 6            | 6779714       | 0                           | 0                            | 0.802448            | 0.433814             | 0.245354             | 0.341368             | 0.162082               | 0.849467               | 5.25E-08                         | 1.20E-07                         |
| 299 | XR 003830 // LOC623748 // similar to cytochrome P450, family 4, sub          | 11           | 6983299       | 0                           | 0                            | 0.103828            | 0.145025             | 0.890177             | 0.130801             | 0.99045                | 0.91553                | 5.29E-08                         | 4.68E-07                         |
| 300 | NM 001033405 // Trem2 // triggering receptor expressed on myeloid            | 8            | 6850821       | 1                           | 0                            | 0.71892             | 0.008458             | 0.0235524            | 0.0790885            | 0.560277               | 0.908407               | 5.47E-08                         | 3.76E-24                         |
| 301 | NM 009862 // Cdc45 // cell division cycle 45 homolog (S. cerevisiae)         | 22           | 6844359       | 3                           | 2                            | 0.530433            | 0.0001927            | 0.0014021            | 5.51E-05             | 0.999195               | 0.746951               | 5.48E-08                         | 0.0001272                        |
| 302 | NM 010101 // Edg3 // endothelial differentiation, sphingolipid G-prote       | 5            | 6800700       | 0                           | 0                            | 0.407483            | 0.259325             | 0.118928             | 0.655358             | 0.837823               | 0.651982               | 5.90E-08                         | 0.00082351                       |
| 303 | NM 145586 // Tmem159 // transmembrane protein 159 // 7 F2 // 2338            | 6            | 6963907       | 1                           | 0                            | 0.527578            | 0.156601             | 0.330042             | 0.0408204            | 0.477805               | 0.672405               | 6.50E-08                         | 0.00028126                       |
| 304 | NM 908518 // 2310047M10Rik // RIKEN cDNA 2310047M10 gene // 13               | 6            | 6781970       | 0                           | 0                            | 0.380957            | 0.64553              | 0.819595             | 0.270794             | 0.970076               | 0.935447               | 6.80E-08                         | 3.68E-05                         |
| 305 | NM 008946 // Psmb6 // proteasome (prosome, macropain) subunit, b             | 28           | 6782134       | 0                           | 0                            | 0.960875            | 0.525989             | 0.0514292            | 0.574611             | 0.987388               | 0.999115               | 6.81E-08                         | 0.00010447                       |
| 306 | NM 028778 // Nuak2 // NUAK family, SNF1-like kinase, 2 // 1 E4 // 74         | 16           | 6753110       | 3                           | 1                            | 0.0005512           | 0.0487939            | 0.144737             | 0.0027577            | 0.953054               | 0.892614               | 7.14E-08                         | 4.48E-08                         |
| 307 | NM 001004140 // Ckap2 // cytoskeleton associated protein 2 // 8 A2 //        | 9            | 6980944       | 0                           | 0                            | 0.177729            | 0.0749756            | 0.583661             | 0.254365             | 0.886926               | 0.924837               | 7.17E-08                         | 3.79E-05                         |
| 308 | NM 904393 // LOC630776 // similar to Nidogen precursor (Entactin) //         | 24           | 6804893       | 1                           | 0                            | 0.516447            | 0.36915              | 0.0125615            | 0.263957             | 0.992612               | 0.984978               | 7.23E-08                         | 2.56E-10                         |
| 309 | NM 018866 // Cxd13 // chemokine (C-X-C motif) ligand 13 // 5 E3 //           | 5            | 6932571       | 1                           | 0                            | 0.0410132           | 0.788281             | 0.494483             | 0.189573             | 0.912201               | 0.873533               | 7.52E-08                         | 3.23E-05                         |
| 310 | NM 894169 // RP23-320E6.1 // hypothetical protein LOC629303 // 11            | 5            | 6790291       | 0                           | 0                            | 0.762905            | 0.26647              | 0.921343             | 0.754326             | 0.795438               | 0.392084               | 7.59E-08                         | 1.11E-05                         |
| 311 | NM 133990 // Il13ra1 // interleukin 13 receptor, alpha 1 // X A3.2 // X      | 12           | 7010645       | 0                           | 0                            | 0.0990419           | 0.0789527            | 0.469333             | 0.374456             | 0.862424               | 0.795569               | 7.95E-08                         | 2.91E-09                         |
| 312 | NM 007659 // Cdc2a // cell division cycle 2 homolog A (S. pombe) //          | 9            | 6774794       | 1                           | 0                            | 0.649087            | 0.0234552            | 0.183714             | 0.176094             | 0.960624               | 0.986629               | 8.02E-08                         | 5.14E-12                         |
| 313 | NM 009027 // Rasgrf2 // RAS protein-specific guanine nucleotide-rele         | 23           | 6815027       | 1                           | 0                            | 0.167481            | 0.0153265            | 0.167298             | 0.219271             | 0.99587                | 0.828478               | 8.95E-08                         | 1.47E-05                         |
| 314 | NM 053082 // Tspan4 // tetraspanin 4 // 7 F5 // 64540 // AK188368 //         | 8            | 6956206       | 1                           | 0                            | 0.805383            | 0.452602             | 0.500862             | 0.0027486            | 0.963678               | 0.953689               | 9.45E-08                         | 1.22E-13                         |
| 315 | NM 025831 // 130001406Rik // RIKEN cDNA 130001406 gene // 13                 | 8            | 6812250       | 0                           | 0                            | 0.547028            | 0.539491             | 0.357963             | 0.695556             | 0.994731               | 0.931745               | 1.13E-07                         | 3.20E-05                         |
| 316 | NM 011355 // Sfp1 // SFFV proviral integration 1 // 2 E32 47.5 cM //         | 7            | 6879020       | 3                           | 1                            | 0.0046885           | 0.117687             | 0.0032918            | 9.54E-05             | 0.480792               | 0.671305               | 1.17E-07                         | 3.69E-09                         |
| 317 | NM 130904 // Cd209d // CD209d antigen // 8 A1.1 // 170779                    | 8            | 6980101       | 2                           | 0                            | 0.013698            | 0.0128575            | 0.997774             | 0.0500991            | 0.477001               | 0.145502               | 1.17E-07                         | 4.60E-08                         |
| 318 | NM 008535 // Lyl1 // lymphoblastic leukemia // 8 C3j8 38.5 cM // 1           | 8            | 6977758       | 1                           | 0                            | 0.0038707           | 0.102622             | 0.121457             | 0.0998894            | 0.931341               | 0.381236               | 1.28E-07                         | 5.56E-07                         |
| 319 | NM 020258 // Slc37a2 // solute carrier family 37 (glycerol-3-phosphat        | 21           | 6994678       | 4                           | 3                            | 5.80E-05            | 2.35E-06             | 8.41E-10             | 0.0014634            | 0.78845                | 0.139502               | 1.40E-07                         | 7.79E-10                         |
| 320 | NM 133995 // Ubp1 // ureidopropionase, beta // 10 C1 // 103149               | 11           | 6768860       | 0                           | 0                            | 0.737849            | 0.183788             | 0.937786             | 0.0794272            | 0.974742               | 0.761783               | 1.43E-07                         | 4.60E-05                         |
| 321 | NM 027533 // Tspan2 // tetraspanin 2 // 3 F3 // 70747 // AK020982 //         | 10           | 6900082       | 0                           | 0                            | 0.25021             | 0.867022             | 0.177938             | 0.924958             | 0.759256               | 0.184201               | 1.49E-07                         | 1.67E-09                         |
| 322 | NM 028039 // Escoc2 // establishment of cohesion 1 homolog 2 (S. ce          | 12           | 6825436       | 0                           | 0                            | 0.194962            | 0.015808             | 0.830281             | 0.0322199            | 0.999913               | 0.620248               | 1.49E-07                         | 5.74E-06                         |
| 323 | NM 172133 // Centa2 // centaurin, alpha 2 // 11 B511 47.24 cM // 216         | 10           | 6782808       | 1                           | 0                            | 0.28626             | 0.120173             | 0.0180521            | 0.364474             | 0.748554               | 0.48556                | 1.55E-07                         | 1.11E-06                         |
| 324 | NM 146260 // Tmie // transmembrane inner ear // 9 F319 64.0 cM // 2          | 8            | 6998983       | 3                           | 2                            | 2.71E-05            | 0.0001712            | 0.196702             | 0.0013398            | 0.735279               | 0.499246               | 1.78E-07                         | 8.48E-05                         |
| 325 | NM 011309 // S100a1 // S100 calcium binding protein A1 // 3 F1-F2 //         | 6            | 6906903       | 0                           | 0                            | 0.0054162           | 0.0907886            | 0.762533             | 0.266914             | 0.938545               | 0.94379                | 1.79E-07                         | 4.65E-05                         |
| 326 | NM 008357 // Il15 // interleukin 15 // 8 C2j8 38.0 cM // 16168 // AB02       | 10           | 6983744       | 0                           | 0                            | 0.0977679           | 0.683418             | 0.23672              | 0.937673             | 0.76289                | 0.410212               | 1.86E-07                         | 9.22E-10                         |
| 327 | NM 011074 // Pftk1 // PFTFAIRE protein kinase 1 // 5 A1j5 0.0 cM // 18       | 16           | 6935970       | 2                           | 0                            | 0.0698463           | 0.028562             | 0.0862146            | 0.0025996            | 0.243999               | 0.68198                | 1.90E-07                         | 8.17E-28                         |
| 328 | NM 029364 // Gns // glucosamine (N-acetyl)-6-sulfatase // 10 D2 //           | 20           | 6771224       | 4                           | 2                            | 0.005151            | 1.39E-05             | 0.0050028            | 3.87E-06             | 0.787379               | 0.486948               | 1.92E-07                         | 9.51E-09                         |
| 329 | NM 018755 // Pgcd // plasma glutamate car                                    |              |               |                             |                              |                     |                      |                      |                      |                        |                        |                                  |                                  |

|       | A                                                                                 | B            | C             | D                           | E                            | F                   | G                    | H                    | I                    | J                      | K                      | L                                | M                                |
|-------|-----------------------------------------------------------------------------------|--------------|---------------|-----------------------------|------------------------------|---------------------|----------------------|----------------------|----------------------|------------------------|------------------------|----------------------------------|----------------------------------|
| 1     | Gene Description                                                                  | # Probe Sets | Transcript ID | Number of cell types p<0.05 | Number of cell types p<0.001 | p value wt v th CD4 | P value wt vs th CD4 | p value wt vs th CD8 | p value wt vs th CD8 | p value wt vs th CD8SP | p value wt vs th CD4SP | P-value WT naïve v WT memory CD4 | P-value WT naïve v WT memory CD8 |
| 337   | NM 021542 // <i>Kork5</i> // potassium channel, subfamily K, member 5 // 6        | 6            | 6823011       | 0                           | 0                            | 0.747708            | 0.701566             | 0.753441             | 0.113586             | 0.102791               | 0.554778               | 2.91E-07                         | 1.13E-08                         |
| 338   | NM 011693 // <i>Vcam1</i> // vascular cell adhesion molecule 1 // 3 G13 5         | 15           | 6908486       | 2                           | 1                            | 0.329967            | 0.005771             | 0.420076             | 0.0272698            | 0.360455               | 0.999978               | 2.95E-07                         | 1.97E-21                         |
| 339   | NM 020590 // <i>Gabaraip1</i> // gamma-aminobutyric acid (GABA(A)) rec 8          | 8            | 6950168       | 1                           | 0                            | 0.780758            | 0.198413             | 0.964469             | 0.0074592            | 0.966109               | 0.283293               | 3.16E-07                         | 4.09E-14                         |
| 340   | NM 175606 // <i>Hod</i> // homeobox only domain // 5 D // 74318 // BC024          | 5            | 6939338       | 0                           | 0                            | 0.78164             | 0.426296             | 0.678831             | 0.779963             | 0.988796               | 0.979943               | 3.25E-07                         | 0.00032475                       |
| 341   | NM 009824 // <i>Cbfa2t3h</i> // core-binding factor, runt domain, alpha sub       | 13           | 6985946       | 0                           | 0                            | 0.139598            | 0.0934973            | 0.223598             | 0.0850034            | 0.974624               | 0.945126               | 3.40E-07                         | 5.63E-13                         |
| 342   | NM 175316 // <i>Slco2b1</i> // solute carrier organic anion transporter fami      | 16           | 6969753       | 2                           | 0                            | 0.0228452           | 0.10229              | 0.0018864            | 0.0534956            | 0.982361               | 0.999895               | 3.59E-07                         | 1.61E-10                         |
| 343   | NM 172732 // <i>Clec9a</i> // C-type lectin domain family 9, member a // 6        | 10           | 6950148       | 0                           | 0                            | 0.543155            | 0.0646563            | 0.787817             | 0.761373             | 0.881509               | 0.97585                | 3.61E-07                         | 1.80E-19                         |
| 344   | AK045150 // B130040O20Rik // RIKEN cDNA B130040O20 gene // 11                     | 13           | 6880508       | 2                           | 0                            | 0.192003            | 0.332706             | 0.0053449            | 0.0108234            | 0.78384                | 0.82629                | 4.40E-07                         | 6.53E-27                         |
| 345   | NM 153513 // BC028528 // cDNA sequence BC028528 // 3 F2.1 // 227                  | 2            | 6907222       | 2                           | 0                            | 0.0073699           | 0.0089566            | 0.36343              | 0.180795             | 0.405578               | 0.897989               | 4.46E-07                         | 5.13E-09                         |
| 346   | NM 008360 // <i>Il18</i> // interleukin 18 // 9 A5.319 29.0 cM // 16173 // AK07   | 7            | 6989015       | 2                           | 0                            | 0.560971            | 0.0016621            | 0.0396334            | 0.629589             | 0.516541               | 0.542877               | 4.76E-07                         | 3.31E-09                         |
| 347   | NM 177547 // <i>Sgk3</i> // serum/glucocorticoid regulated kinase 3 // 1 A2       | 18           | 6747497       | 2                           | 0                            | 0.0035063           | 0.0417684            | 0.617944             | 0.914339             | 0.810939               | 0.22249                | 5.47E-07                         | 1.04E-05                         |
| 348   | NM 170702 // <i>Cd40</i> // CD40 antigen // 2 H3I2 97.0 cM // 21939 // NM13       | 13           | 6883132       | 1                           | 0                            | 0.059479            | 0.0850535            | 0.0944859            | 0.0378738            | 0.983278               | 0.945691               | 5.57E-07                         | 3.71E-09                         |
| 349   | NM 194355 // <i>Spire1</i> // spire homolog 1 (Drosophila) // 18 E1 // 68168      | 21           | 6866305       | 0                           | 0                            | 0.993887            | 0.790556             | 0.553446             | 0.270845             | 0.999883               | 0.985903               | 5.77E-07                         | 5.80E-06                         |
| 350   | NM 053094 // <i>Cd163</i> // CD163 antigen // 6 F2 // 93671 // AK032012           | 20           | 6949766       | 0                           | 0                            | 0.53287             | 0.191496             | 0.449275             | 0.534403             | 0.988461               | 0.137913               | 5.99E-07                         | 7.58E-12                         |
| 351   | NM 025422 // <i>Cd302</i> // CD302 antigen // 2 C1.1 // 66205 // XR 00397         | 7            | 6887079       | 1                           | 0                            | 0.12043             | 0.0964111            | 0.0087185            | 0.505794             | 0.995811               | 0.993226               | 6.59E-07                         | 4.35E-09                         |
| 352   | NM 011520 // <i>Sdc3</i> // syndecan 3 // 4 D2.314 60.8 cM // 20970 // AK0        | 11           | 6917389       | 4                           | 0                            | 0.0039114           | 0.0081624            | 0.003335             | 0.0054826            | 0.626897               | 0.97915                | 6.63E-07                         | 2.17E-24                         |
| 353   | NM 975975 // <i>Coro2a</i> // coronin, actin binding protein 2A // 4 B1 // 10     | 20           | 6928131       | 1                           | 0                            | 0.365404            | 0.686599             | 0.539221             | 0.0416668            | 0.701091               | 0.997018               | 6.64E-07                         | 1.15E-09                         |
| 354   | NM 905223 // LOC631417 // similar to Interferon-activatable protein 2             | 7            | 6764246       | 0                           | 0                            | 0.213421            | 0.236983             | 0.0807404            | 0.871348             | 0.96341                | 0.955724               | 6.93E-07                         | 1.93E-15                         |
| 355   | XR 002483 // LOC669350 // similar to toll-like receptor 9 // 6                    | 9            | 6929159       | 3                           | 0                            | 0.205048            | 0.0078148            | 0.0338224            | 0.0033336            | 0.981429               | 0.90557                | 6.95E-07                         | 3.29E-10                         |
| 356   | NM 008737 // <i>Nrp1</i> // neuropilin 1 // 8 E18 73.0 cM // 18186 // AK1354      | 20           | 6980016       | 0                           | 0                            | 0.386762            | 0.08422              | 0.168537             | 0.854488             | 0.998641               | 0.878136               | 7.28E-07                         | 9.58E-19                         |
| 357   | NM 029494 // <i>Rab30</i> // RAB30, member RAS oncogene family // 7 E             | 8            | 6962577       | 0                           | 0                            | 0.901647            | 0.405793             | 0.265023             | 0.154862             | 0.6441                 | 0.719818               | 7.41E-07                         | 5.10E-14                         |
| 358   | NM 013748 // <i>Clnk</i> // cytokine-dependent hematopoietic cell linker // 1     | 13           | 6937617       | 0                           | 0                            | 0.12571             | 0.195329             | 0.859572             | 0.598134             | 0.828924               | 0.450333               | 7.59E-07                         | 1.03E-13                         |
| 359   | NM 009613 // <i>Adam11</i> // a disintegrin and metalloprotease domain            | 127          | 6784363       | 1                           | 0                            | 0.522975            | 0.077431             | 0.304958             | 0.0353597            | 0.177105               | 0.991495               | 7.89E-07                         | 1.68E-06                         |
| 360   | NM 029097 // <i>Atp13a2</i> // ATPase type 13A2 // 4 D3 // 74772 // XM 9          | 31           | 6918129       | 3                           | 1                            | 0.0761357           | 0.0094429            | 5.53E-05             | 0.004036             | 0.986225               | 0.99991                | 7.90E-07                         | 0.000202625                      |
| 361   | NM 013820 // <i>Hk2</i> // hexokinase 2 // 6 C3I6 34.5 cM // 15277 // X966        | 25           | 6954982       | 0                           | 0                            | 0.801752            | 0.669921             | 0.996125             | 0.549057             | 0.339011               | 0.882394               | 9.14E-07                         | 3.55E-15                         |
| 362   | NM 994774 // LOC668178 // similar to UbiE-YGH1.1 fusion protein // 4              | 4            | 6833232       | 0                           | 0                            | 0.106762            | 0.672371             | 0.0531578            | 0.635227             | 0.788888               | 0.790073               | 9.20E-07                         | 2.07E-05                         |
| 363   | NM 172277 // <i>Snx8</i> // sorting nexin 8 // 5 G2 // 231834 // BC019142         | 14           | 6942716       | 1                           | 0                            | 0.0089447           | 0.0947545            | 0.0472038            | 0.312111             | 0.677991               | 0.96178                | 9.93E-07                         | 6.85E-08                         |
| 364   | NM 026376 // <i>Plexnd1</i> // plexin D1 // 6 E3 // 67784                         | 44           | 6956748       | 3                           | 1                            | 0.0080783           | 0.0034019            | 0.131106             | 0.0001671            | 0.949433               | 1                      | 1.00E-06                         | 0.00033996                       |
| 365   | NM 147219 // <i>Abca5</i> // ATP-binding cassette, sub-family A (ABC1), m         | 38           | 6792129       | 3                           | 0                            | 0.0433674           | 0.0095511            | 0.250937             | 0.0261285            | 0.905824               | 0.999847               | 1.03E-06                         | 0.00056103                       |
| 366   | NM 153197 // <i>Clec4a3</i> // C-type lectin domain family 4, member a3 // 9      | 9            | 6949727       | 1                           | 0                            | 0.075502            | 0.0715542            | 0.739809             | 0.760419             | 0.0449096              | 0.801989               | 1.06E-06                         | 2.81E-09                         |
| 367   | BC096435 // <i>Cd74</i> // CD74 antigen (invariant polypeptide of major his       | 12           | 6861341       | 3                           | 1                            | 0.0148917           | 0.0070593            | 8.77E-05             | 0.267549             | 0.986192               | 0.597209               | 1.10E-06                         | 9.49E-08                         |
| 368   | NM 018752 // <i>Trpm1</i> // transient receptor potential cation channel, su      | 22           | 6961099       | 2                           | 1                            | 0.965731            | 6.88E-06             | 0.0089631            | 0.318907             | 0.987952               | 0.996862               | 1.12E-06                         | 4.75E-12                         |
| 369   | NM 008361 // <i>Il1b</i> // interleukin 1 beta // 2 F12 73.0 cM // 16176 // AK    | 8            | 6890838       | 0                           | 0                            | 0.367828            | 0.675126             | 0.18548              | 0.831851             | 0.391991               | 0.750786               | 1.12E-06                         | 2.35E-07                         |
| 370   | NM 011461 // <i>Spic</i> // Spi-C transcription factor (Spi-1/PU.1 related) // 7  | 7            | 6775864       | 3                           | 1                            | 0.0108593           | 0.0003339            | 0.0657298            | 0.120377             | 0.0229601              | 0.236892               | 1.19E-06                         | 3.38E-08                         |
| 371   | NM 007897 // <i>Ebf1</i> // early B-cell factor 1 // 11 B1.111 20.0 cM // 135     | 15           | 6780443       | 0                           | 0                            | 0.19026             | 0.670243             | 0.620477             | 0.751903             | 0.999989               | 0.846403               | 1.21E-06                         | 2.51E-07                         |
| 372   | NM 023056 // 1810009M01Rik // RIKEN cDNA 1810009M01 gene // 10                    | 10           | 6953429       | 0                           | 0                            | 0.709343            | 0.277668             | 0.735288             | 0.409462             | 0.99939                | 0.978905               | 1.22E-06                         | 6.90E-10                         |
| 373   | NM 145402 // <i>Tmem51</i> // transmembrane protein 51 // 4 E1 // 214359          | 5            | 6926504       | 1                           | 0                            | 0.213073            | 0.691791             | 0.0089992            | 0.0502315            | 0.911292               | 0.991652               | 1.25E-06                         | 0.00011072                       |
| 374   | NM 031181 // <i>Siglece</i> // sialic acid binding Ig-like lectin E // 7 B2 // 83 | 12           | 6966818       | 1                           | 0                            | 0.0304912           | 0.0336889            | 0.0985523            | 0.221193             | 0.784465               | 0.972373               | 1.28E-06                         | 9.01E-10                         |
| 375   | NM 024217 // <i>Crmtn3</i> // CKLF-like MARVEL transmembrane domain               | 5            | 6987366       | 1                           | 0                            | 0.0021929           | 0.436129             | 0.0811443            | 0.438789             | 0.953934               | 0.631552               | 1.28E-06                         | 4.93E-09                         |
| 376   | NM 173182 // <i>Fndc3b</i> // fibronectin type III domain containing 3B // 3      | 31           | 6903779       | 1                           | 0                            | 0.139912            | 0.174797             | 0.0147281            | 0.124523             | 0.987302               | 0.97161                | 1.28E-06                         | 3.30E-07                         |
| 377   | NM 980282 // LOC675222 // similar to basic transcription factor 3 // 8            | 8            | 6785111       | 0                           | 0                            | 0.989951            | 0.868249             | 0.0050335            | 0.447642             | 0.903666               | 0.716455               | 1.32E-06                         | 5.75E-16                         |
| 378   | NM 975780 // <i>Anub1</i> // AN1, ubiquitin-like, homolog (Xenopus laevis)        | 10           | 6949272       | 0                           | 0                            | 0.732317            | 0.279838             | 0.47607              | 0.160172             | 0.215562               | 0.363687               | 1.42E-06                         | 0.00034046                       |
| 379   | NM 023063 // <i>Lima1</i> // LIM domain and actin binding 1 // 15 F115 60         | 11           | 6838492       | 0                           | 0                            | 0.34063             | 0.0775645            | 0.0588416            | 0.17632              | 0.810969               | 0.325793               | 1.46E-06                         | 4.49E-16                         |
| 380   | NM 133851 // <i>Nusap1</i> // nucleolar and spindle associated protein 1 // 11    | 11           | 6880529       | 1                           | 0                            | 0.393833            | 0.106851             | 0.5892               | 0.0025972            | 0.999408               | 0.998579               | 1.51E-06                         | 1.23E-05                         |
| 381   | NM 175493 // <i>Gpr68</i> // G protein-coupled receptor 68 // 12 E // 23837       | 8            | 6803113       | 1                           | 0                            | 0.627221            | 0.0396865            | 0.140608             | 0.424865             | 0.966137               | 0.99784                | 1.52E-06                         | 1.14E-06                         |
| 382   | NM 010404 // <i>Hap1</i> // huntingtin-associated protein 1 // 11 D11 60.0        | 19           | 6791418       | 2                           | 1                            | 0.132457            | 0.197653             | 0.0187989            | 3.67E-06             | 0.557183               | 0.942474               | 1.57E-06                         | 1.37E-05                         |
| 383   | NM 010867 // <i>Myom1</i> // myomesin 1 // 17 E1.3 // 17929 // AK052539           | 36           | 6882031       | 1                           | 0                            | 0.237528            | 0.0013254            | 0.162064             | 0.181991             | 0.79813                | 0.620177               | 1.60E-06                         | 0.0004888                        |
| 384   | NM 146190 // <i>Tubgcp5</i> // tubulin, gamma complex associated protein 7        | 7            | 6960834       | 1                           | 0                            | 0.625811            | 0.123327             | 0.706589             | 0.340335             | 0.275758               | 0.0216782              | 1.61E-06                         | 3.53E-05                         |
| 385   | NM 001000689 // <i>Hes1</i> // hairy and enhancer of split 1 (Drosophila) // 9    | 9            | 6840400       | 4                           | 1                            | 0.0118164           | 0.0155418            | 0.0001622            | 0.0042484            | 0.517743               | 0.915257               | 1.61E-06                         | 5.16E-08                         |
| 386   | NM 001039493 // 9430067K14Rik // RIKEN cDNA 9430067K14 gene // 14                 | 14           | 6759342       | 0                           | 0                            | 0.0122166           | 0.209641             | 0.0504258            | 0.461987             | 0.996038               | 0.819339               | 1.71E-06                         | 9.96E-06                         |
| 387   | NM 207246 // <i>Rasgrp3</i> // RAS, guanyl releasing protein 3 // 17 E2 // 2      | 20           | 6882535       | 3                           | 1                            | 0.0406035           | 0.0264113            | 0.269112             | 0.0003303            | 0.996484               | 0.992037               | 1.80E-06                         | 4.02E-25                         |
| 388   | NM 001001932 // <i>Eea1</i> // early endosome antigen 1 // 10 C3 // 21623         | 28           | 6770013       | 0                           | 0                            | 0.69117             | 0.970906             | 0.690144             | 0.767556             | 0.926684               | 0.64517                | 1.85E-06                         | 3.92E-10                         |
| 389   | NM 007984 // <i>Fscn1</i> // fascin homolog 1, actin bundling protein (Stron      | 10           | 6935370       | 0                           | 0                            | 0.0613657           | 0.0122099            | 0.113097             | 0.50678              | 0.853047               | 0.979287               | 2.06E-06                         | 7.10E-07                         |
| 390   | NM 134248 // <i>Havcr1</i> // hepatitis A virus cellular receptor 1 // 11 B1.1    | 6            | 6780570       | 0                           | 0                            | 0.405897            | 0.230989             | 0.953786             | 0.407422             | 0.979455               | 0.94287                | 2.18E-06                         | 0.00034587                       |
| 391   | NM 007643 // <i>Cd36</i> // CD36 antigen // 5 A3I5 2.0 cM // 12491 // AK15        | 21           | 6936406       | 0                           | 0                            | 0.707981            | 0.443209             | 0.161243             | 0.991889             | 0.864363               | 0.921952               | 2.33E-06                         | 6.62E-20                         |
| 392   | NM 975701 // LOC669547 // hypothetical protein LOC669547 // 668                   | 8            | 6768071       | 0                           | 0                            | 0.233665            | 0.115888             | 0.181751             | 0.512121             | 0.970634               | 0.325838               | 2.33E-06                         | 3.63E-09                         |
| 393   | NM 884335 // <i>Ankrd57</i> // ankyrin repeat domain 57 // 10 B4 // 268301        | 10           | 6768114       | 1                           | 0                            | 0.560937            | 0.139973             | 0.0038613            | 0.0835416            | 0.858953               | 0.896825               | 2.35E-06                         | 4.27E-19                         |
| 394   | NM 007801 // <i>Ctsh</i> // cathepsin H // 9 E3.119 50.0 cM // 13036 // BC0       | 9            | 6991264       | 0                           | 0                            | 0.323777            | 0.158349             | 0.005928             | 0.657965             | 0.999785               | 0.983059               | 2.63E-06                         | 1.89E-10                         |
| 395</ |                                                                                   |              |               |                             |                              |                     |                      |                      |                      |                        |                        |                                  |                                  |

|     | A                                                                              | B            | C             | D                           | E                            | F                   | G                    | H                    | I                    | J                      | K                      | L                                | M                                |
|-----|--------------------------------------------------------------------------------|--------------|---------------|-----------------------------|------------------------------|---------------------|----------------------|----------------------|----------------------|------------------------|------------------------|----------------------------------|----------------------------------|
| 1   | Gene Description                                                               | # Probe Sets | Transcript ID | Number of cell types p<0.05 | Number of cell types p<0.001 | p value wt v th CD4 | P value wt vs th CD4 | p value wt vs th CD8 | p value wt vs th CD8 | p value wt vs th CD8SP | p value wt vs th CD4SP | P-value WT naïve v WT memory CD4 | P-value WT naïve v WT memory CD8 |
| 404 | NM 010512 // Igf1 // insulin-like growth factor 1 // 10 C1[10] 48.0 cM //      | 8            | 6769597       | 2                           | 0                            | 0.0344241           | 0.280448             | 0.0479371            | 0.332443             | 0.981859               | 0.94052                | 4.26E-06                         | 1.15E-12                         |
| 405 | XM 992247 // LOC676697 // hypothetical protein LOC676697 // 679                | 8            | 6926498       | 0                           | 0                            | 0.0508137           | 0.152722             | 0.155211             | 0.152173             | 0.973511               | 0.719547               | 4.27E-06                         | 8.63E-05                         |
| 406 | NM 009695 // ApoE // apolipoprotein E // 7 A3[7] 4.0 cM // 11816               | 8            | 6973587       | 2                           | 0                            | 0.304721            | 0.0094126            | 0.0285458            | 0.235245             | 0.434701               | 0.953914               | 4.32E-06                         | 2.30E-07                         |
| 407 | NM 029932 // 983000217Rik // RIKEN cDNA 983000217 gene // 11                   | 13           | 6789544       | 1                           | 0                            | 0.141434            | 0.34058              | 0.570751             | 0.0106367            | 0.965319               | 0.519376               | 5.83E-06                         | 2.25E-13                         |
| 408 | NM 011375 // St3gal5 // ST3 beta-galactosidase alpha-2,3-sialyltransferase     | 8            | 6946954       | 0                           | 0                            | 0.160551            | 0.68791              | 0.809806             | 0.823165             | 0.963837               | 0.592152               | 6.01E-06                         | 3.43E-10                         |
| 409 | NM 008533 // Cd180 // CD180 antigen // 13 D1 // 17079 // AK089613              | 6            | 6809655       | 1                           | 0                            | 0.0033875           | 0.126504             | 0.627291             | 0.528612             | 0.945409               | 0.971198               | 6.46E-06                         | 5.30E-05                         |
| 410 | NM 011700 // Vill // villin-like // 9 F4 // 22351 // BC022664 // Vill // villi | 23           | 6922866       | 4                           | 1                            | 0.0045907           | 0.00014              | 0.0270789            | 0.028022             | 0.997946               | 0.984554               | 6.47E-06                         | 4.31E-05                         |
| 411 | NM 008486 // Anpep // alanyl (membrane) aminopeptidase // 7 D2 // 123          | 13           | 6968735       | 1                           | 1                            | 0.0678737           | 0.136549             | 0.278177             | 0.0601021            | 0.747367               | 0.191372               | 6.48E-06                         | 2.95E-35                         |
| 412 | NM 010897 // Nf1 // neurofibromatosis 1 // 11 B4-5[11] 46.06 cM // 18063       | 6            | 6782776       | 1                           | 0                            | 0.0616025           | 6.93E-07             | 0.310785             | 0.536414             | 0.908732               | 0.987024               | 6.52E-06                         | 1.52E-08                         |
| 413 | NM 016925 // Fanca // Fanconi anemia, complementation group A // 842           | 13           | 6985991       | 3                           | 0                            | 0.45964             | 0.0082493            | 0.03096              | 0.0080498            | 0.999517               | 0.907376               | 6.96E-06                         | 1.21E-15                         |
| 414 | NM 010276 // Gem // GTP binding protein (gene overexpressed in sks)            | 5            | 6911727       | 0                           | 0                            | 0.342346            | 0.271049             | 0.702273             | 0.3067               | 0.299747               | 0.541982               | 7.38E-06                         | 3.03E-08                         |
| 415 | XM 001003619 // Rheb1 // Ras homolog enriched in brain like 1 // 15            | 8            | 6838410       | 3                           | 3                            | 0.22817             | 9.03E-07             | 2.01E-06             | 9.49E-07             | 0.479696               | 0.972368               | 7.97E-06                         | 7.82E-05                         |
| 416 | NM 026316 // Aldh3b1 // aldehyde dehydrogenase 3 family, member 1              | 7            | 6870958       | 1                           | 0                            | 0.418379            | 0.004626             | 0.270632             | 0.0914116            | 0.871174               | 0.887656               | 8.04E-06                         | 5.53E-05                         |
| 417 | NM 133685 // Rab31 // RAB31, member RAS oncogene family // 17 E14              | 1            | 6856676       | 0                           | 0                            | 0.19156             | 0.57776              | 0.679167             | 0.971826             | 0.718424               | 0.596583               | 8.05E-06                         | 6.51E-07                         |
| 418 | NM 009445 // Ttk // Ttk protein kinase // 9 E2 // 22137 // AK041487 // 23      | 6            | 6909948       | 1                           | 0                            | 0.908375            | 0.001099             | 0.369036             | 0.229381             | 0.998712               | 0.951506               | 8.22E-06                         | 1.58E-09                         |
| 419 | NM 984804 // Clec7a // C-type lectin domain family 7, member a // 5            | 5            | 6957410       | 0                           | 0                            | 0.560148            | 0.629912             | 0.19724              | 0.413919             | 0.872633               | 0.766982               | 8.71E-06                         | 3.77E-05                         |
| 420 | NM 144818 // Brn1 // barren homolog (Drosophila) // 2 F1 // 215387             | 18           | 6890658       | 1                           | 0                            | 0.0911757           | 0.0907038            | 0.198466             | 0.0185804            | 0.999316               | 0.960046               | 9.07E-06                         | 0.0012709                        |
| 421 | NM 008464 // Kir6a // killer cell lectin-like receptor, subfamily A, mem       | 12           | 6957432       | 1                           | 1                            | 0.983757            | 0.11345              | 0.975341             | 2.34E-06             | 0.625866               | 0.891808               | 9.44E-06                         | 0.00066332                       |
| 422 | NM 175688 // A530099J19Rik // RIKEN cDNA A530099J19 gene // 13                 | 9            | 6811368       | 1                           | 0                            | 0.316704            | 0.321454             | 0.717328             | 0.0295532            | 0.600339               | 0.832604               | 9.83E-06                         | 5.17E-18                         |
| 423 | NM 028808 // P2ry13 // purinergic receptor P2Y, G-protein coupled 13           | 4            | 6905422       | 1                           | 0                            | 0.496182            | 0.0112065            | 0.0868037            | 0.611918             | 0.915533               | 0.722991               | 1.04E-05                         | 7.21E-08                         |
| 424 | NM 026560 // Cdc48 // cell division cycle associated 8 // 4 D2.2[4] 57.1       | 13           | 6925254       | 0                           | 0                            | 0.154234            | 0.277098             | 0.687067             | 0.989117             | 0.997624               | 0.99963                | 1.05E-05                         | 0.0014805                        |
| 425 | NM 001005423 // Mreg // melanoregulin // 1 C3 // 381269 // AY62821             | 8            | 6759642       | 3                           | 0                            | 0.0022372           | 0.010755             | 0.061767             | 0.011157             | 0.638829               | 0.920955               | 1.05E-05                         | 7.70E-14                         |
| 426 | NM 011056 // Pde4d // phosphodiesterase 4D, cAMP specific // 13 D1             | 17           | 6810067       | 2                           | 0                            | 0.0287844           | 0.0136342            | 0.584216             | 0.153646             | 0.999982               | 0.998979               | 1.24E-05                         | 0.00065444                       |
| 427 | NM 011521 // Sdc4 // syndecan 4 // 2 H3[2] 94.0 cM // 20971 // BC001           | 6            | 6892905       | 0                           | 0                            | 0.11332             | 0.840027             | 0.999181             | 0.294067             | 0.929067               | 0.495719               | 1.30E-05                         | 0.00017103                       |
| 428 | NM 028390 // Anln // anillin, actin binding protein (scrap homolog, D)         | 27           | 6938990       | 2                           | 0                            | 0.610852            | 0.0459114            | 0.0095424            | 0.341802             | 0.999939               | 0.934524               | 1.33E-05                         | 9.33E-05                         |
| 429 | NM 001007220 // Adam22 // a disintegrin and metalloproteinase doma             | 30           | 6936076       | 1                           | 0                            | 0.0994437           | 0.213605             | 0.392072             | 0.0026833            | 0.800866               | 0.200484               | 1.33E-05                         | 0.00050033                       |
| 430 | NM 990644 // LOC674182 // hypothetical protein LOC674182 // 67                 | 14           | 6921131       | 0                           | 0                            | 0.536992            | 0.180997             | 0.609749             | 0.11837              | 0.95424                | 0.859585               | 1.39E-05                         | 6.18E-05                         |
| 431 | NM 028279 // Naalad2 // N-acetylated alpha-linked acidic dipeptidase           | 20           | 6933587       | 1                           | 0                            | 0.995158            | 0.0258368            | 0.429904             | 0.983316             | 0.999999               | 0.996778               | 1.49E-05                         | 0.00010592                       |
| 432 | NM 001001880 // Mpz1 // myelin protein zero-like 1 // 1 H2.3 // 6848           | 110          | 6763777       | 3                           | 1                            | 0.0004135           | 0.0084429            | 0.001198             | 0.132662             | 0.665193               | 0.754302               | 1.61E-05                         | 1.19E-06                         |
| 433 | NM 139065 // BC013481 // cDNA sequence BC013481 // 5 C3.1 // 24                | 5            | 6943476       | 1                           | 0                            | 0.0756174           | 0.859776             | 0.857426             | 0.359121             | 0.465101               | 0.388044               | 1.67E-05                         | 2.81E-08                         |
| 434 | NM 011871 // Prkra // protein kinase, interferon inducible double str          | 10           | 6888002       | 0                           | 0                            | 0.242591            | 0.868275             | 0.11362              | 0.948435             | 0.967828               | 0.859094               | 1.71E-05                         | 0.00014516                       |
| 435 | NM 181315 // Car5b // carbonic anhydrase 5b, mitochondrial // X F5 //          | 8            | 7020676       | 2                           | 0                            | 0.734343            | 0.034768             | 0.776312             | 0.234712             | 0.0471703              | 0.772989               | 1.92E-05                         | 8.59E-05                         |
| 436 | NM 286230 // E030030106Rik // RIKEN cDNA E030030106 gene // 10                 | 8            | 6762804       | 1                           | 0                            | 0.328838            | 0.0109709            | 0.234546             | 0.356239             | 0.637302               | 0.992905               | 1.95E-05                         | 0.00060884                       |
| 437 | NM 146173 // Tspan33 // tetraspanin 33 // 6 A3.3 // 232670 // NM 17            | 10           | 6945026       | 1                           | 0                            | 0.324586            | 0.165497             | 0.430474             | 0.015018             | 0.313491               | 0.841122               | 2.13E-05                         | 0.000567                         |
| 438 | NM 177715 // Kctd12 // potassium channel tetramerisation domain co             | 5            | 6827123       | 3                           | 2                            | 0.0155001           | 4.16E-05             | 0.447857             | 0.0003403            | 0.875552               | 0.724759               | 2.15E-05                         | 0.00029037                       |
| 439 | NM 011179 // Psp // prosaposin // 10 B4[10] 35.0 cM // 19156 // AK2            | 15           | 6768155       | 1                           | 0                            | 0.737508            | 0.0213905            | 0.651105             | 0.480213             | 0.999637               | 0.963754               | 2.22E-05                         | 1.01E-06                         |
| 440 | NM 153090 // For1 // Fc receptor-like 1 // 3 F1 // 229499 // NM 1781           | 12           | 6898996       | 0                           | 0                            | 0.522611            | 0.198129             | 0.677928             | 0.43084              | 0.903873               | 0.886983               | 2.27E-05                         | 2.39E-05                         |
| 441 | NM 025760 // Ptlad2 // protein tyrosine phosphatase-like A domain              | 7            | 6923142       | 1                           | 1                            | 0.0835793           | 1.01E-06             | 0.109485             | 0.0628494            | 0.99963                | 0.160809               | 2.58E-05                         | 0.00076463                       |
| 442 | NM 007995 // Fcna // ficolin A // 2 A3 // 14133 // AK133539 // Fcna //         | 11           | 6885432       | 3                           | 3                            | 0.0506094           | 6.26E-07             | 8.13E-05             | 5.76E-05             | 0.950293               | 0.934335               | 2.63E-05                         | 2.67E-15                         |
| 443 | AK011893 // Spbc25 // spindle pole body component 25 homolog (S.               | 10           | 6887520       | 0                           | 0                            | 0.0891145           | 0.486534             | 0.309636             | 0.457039             | 0.974352               | 0.825304               | 2.65E-05                         | 1.98E-05                         |
| 444 | NM 008776 // Pafah1b3 // platelet-activating factor acetylhydrolase, is        | 7            | 6965940       | 1                           | 0                            | 0.376374            | 0.14596              | 0.270816             | 0.017221             | 0.0976732              | 0.782135               | 2.73E-05                         | 0.00010239                       |
| 445 | XM 974657 // 1100001H23Rik // RIKEN cDNA 1100001H23 gene // 6                  | 13           | 6957744       | 0                           | 0                            | 0.98733             | 0.378132             | 0.406179             | 0.486649             | 0.994752               | 0.872026               | 2.75E-05                         | 5.81E-20                         |
| 446 | NM 010370 // Gzma // granzyme A // 13 D[13] 64.0 cM // 14938 // XM             | 7            | 6816160       | 0                           | 0                            | 0.863995            | 0.0110009            | 0.368064             | 0.283593             | 0.494537               | 0.900684               | 2.78E-05                         | 1.24E-19                         |
| 447 | NM 020590 // Gabarapl1 // gamma-aminobutyric acid (GABA(A)) rece               | 9            | 6950160       | 0                           | 0                            | 0.745353            | 0.904104             | 0.705126             | 0.780099             | 0.993973               | 0.301111               | 2.84E-05                         | 0.0003956                        |
| 448 | NM 008916 // RP23-136K12.4 // putative phosphatase // 11 B5[11] 44             | 35           | 6782457       | 3                           | 2                            | 0.101993            | 0.0007145            | 0.0137963            | 0.0001263            | 0.979621               | 0.751482               | 2.84E-05                         | 1.15E-10                         |
| 449 | NM 026785 // Ube2c // ubiquitin-conjugating enzyme E2C // 2 H3[2] 9            | 3            | 6883114       | 0                           | 0                            | 0.968826            | 0.0543229            | 0.733104             | 0.0634772            | 0.946119               | 0.976785               | 2.90E-05                         | 1.34E-05                         |
| 450 | XR 002190 // LOC621312 // similar to fibrinogen // 13 D1 // 621312 //          | 8            | 6850502       | 2                           | 1                            | 0.179729            | 0.00022              | 0.0300252            | 0.0734509            | 0.808118               | 0.821504               | 2.98E-05                         | 1.26E-07                         |
| 451 | NM 009369 // Tgfb1 // transforming growth factor, beta induced // 13           | 18           | 6807336       | 1                           | 0                            | 0.283966            | 0.0225978            | 0.783437             | 0.232005             | 0.98906                | 0.986653               | 3.16E-05                         | 2.71E-16                         |
| 452 | NM 011337 // Ccl3 // chemokine (C-C motif) ligand 3 // 11 C1[11] 47.59         | 4            | 6790294       | 0                           | 0                            | 0.513893            | 0.450573             | 0.343484             | 0.229158             | 0.69423                | 0.489808               | 3.25E-05                         | 5.04E-06                         |
| 453 | XM 985034 // LOC666623 // similar to putative retrovirus-related gag           | 14           | 6820323       | 0                           | 0                            | 0.870694            | 0.0700952            | 0.341744             | 0.315413             | 0.165837               | 0.735214               | 3.30E-05                         | 1.17E-10                         |
| 454 | NM 009909 // Il8rb // interleukin 8 receptor, beta // 1 C3[1] 40.0 cM //       | 14           | 6750519       | 1                           | 0                            | 0.550072            | 0.456949             | 0.311435             | 0.320497             | 0.701907               | 0.977629               | 3.34E-05                         | 0.0001539                        |
| 455 | NM 008491 // Lcn2 // lipocalin 2 // 2 A3[2] 27.0 cM // 16819                   | 8            | 6885873       | 0                           | 0                            | 0.537304            | 0.698916             | 0.450749             | 0.381918             | 0.67888                | 0.806263               | 3.36E-05                         | 0.00085775                       |
| 456 | NM 010730 // Anxa1 // annexin A1 // 19 B[19] 18.0 cM // 16952 // BC            | 12           | 68270120      | 1                           | 0                            | 0.0142255           | 0.441299             | 0.0339759            | 0.39079              | 0.491396               | 0.841454               | 3.37E-05                         | 2.73E-11                         |
| 457 | NM 133888 // Smpd3b // sphingomyelin phosphodiesterase, acid-like              | 9            | 6925829       | 2                           | 0                            | 0.597208            | 0.0290207            | 0.356151             | 0.0294392            | 0.962842               | 0.756639               | 3.39E-05                         | 1.28E-05                         |
| 458 | NM 007781 // Csf2rb2 // colony stimulating factor 2 receptor, beta 2           | 1            | 6837008       | 0                           | 0                            | 0.501332            | 0.456724             | 0.214537             | 0.197541             | 0.715517               | 0.991512               | 3.53E-05                         | 9.36E-08                         |
| 459 | NM 007543 // Ceacam2 // CEA-related cell adhesion molecule 2 // 7              | 7            | 6965950       | 1                           | 0                            | 0.0968096           | 0.0421882            | 0.441212             | 0.975993             | 0.735803               | 0.355E-05              | 7.21E-06                         |                                  |
| 460 | NM 906349 // LOC632297 // similar to UDP glycosyltransferase 1 fam             | 9            | 671362        | 0                           | 0                            | 0.999604            | 0.965059             | 0.53884              | 0.216666             | 0.193757               | 0.823087               | 3.67E-05                         | 5.23E-12                         |
| 461 | NM 009853 // Cd68 // CD68 antigen // 11 B3[11] 39.0 cM // 12514                | 9            | 6789325       | 0                           | 0                            | 0.142059            | 0.924898             | 0.227453             | 0.26368              | 0.899668               | 0.375271               | 3.76E-05                         | 3.25E-05                         |
| 462 | NM 009980 // Ctbp2 // C-terminal binding protein 2 // 7 F3[7] 66.0 cM //       | 17           | 6971714       | 2                           | 0                            | 0.062606            | 0.033996             | 0.662825             | 0.0111922            | 0.992417               | 0.976731               | 3.80E-05                         | 0.00071516                       |
| 463 | NM 021439 // Cbst1 // carboxylate sulfotransferase 11 // 10 C1 // 5            | 4            | 6769366       |                             |                              |                     |                      |                      |                      |                        |                        |                                  |                                  |

|     | A                                                                            | B            | C             | D                           | E                            | F                          | G                           | H                           | I                           | J                             | K                             | L                                | M                                |
|-----|------------------------------------------------------------------------------|--------------|---------------|-----------------------------|------------------------------|----------------------------|-----------------------------|-----------------------------|-----------------------------|-------------------------------|-------------------------------|----------------------------------|----------------------------------|
| 1   | Gene Description                                                             | # Probe Sets | Transcript ID | Number of cell types p<0.05 | Number of cell types p<0.001 | p value wt v th memory CD4 | P value wt vs th memory CD4 | p value wt vs th memory CD8 | p value wt vs th thymus CD8 | p value wt vs th thymus CD8SP | p value wt vs th thymus CD4SP | P-value WT naïve v WT memory CD4 | P-value WT naïve v WT memory CD8 |
| 471 | XM 983882 // 9130218011Rik // RIKEN cDNA 9130218011.gene // 1                | 6            | 6836962       | 0                           | 0                            | 0.778791                   | 0.288498                    | 0.293732                    | 0.906676                    | 0.367512                      | 0.32498                       | 5.26E-05                         | 2.79E-08                         |
| 472 | XM 924210 // LOC637082 // similar to Traf2 binding protein // // 6370        | 4            | 6901196       | 0                           | 0                            | 0.33347                    | 0.66806                     | 0.694893                    | 0.419574                    | 0.425915                      | 0.294883                      | 5.58E-05                         | 7.73E-06                         |
| 473 | XM 982009 // Casc5 // cancer susceptibility candidate 5 // // 2 E5 // 764    | 9            | 6880492       | 0                           | 0                            | 0.644364                   | 0.8613                      | 0.909061                    | 0.446482                    | 0.943744                      | 0.998719                      | 6.14E-05                         | 0.00059912                       |
| 474 | NR 021396 // Pcdllg2 // programmed cell death 1 ligand 2 // // 19 C2-        | 6            | 6869035       | 0                           | 0                            | 0.256013                   | 0.776487                    | 0.067314                    | 0.412094                    | 0.640129                      | 0.962829                      | 6.19E-05                         | 0.00018345                       |
| 475 | XR 004796 // LOC629568 // similar to shugoshin-like 1 // X C2 // 629         | 6            | 6868096       | 0                           | 0                            | 0.639583                   | 0.53078                     | 0.730083                    | 0.579999                    | 0.989732                      | 0.489204                      | 6.37E-05                         | 7.60E-08                         |
| 476 | NM 009763 // Bst1 // bone marrow stromal cell antigen 1 // // 5 B3/5 25      | 11           | 6930371       | 0                           | 0                            | 0.345986                   | 0.10185                     | 0.962699                    | 0.0745292                   | 0.999798                      | 0.970332                      | 6.61E-05                         | 7.15E-10                         |
| 477 | NM 009229 // Sntb2 // syntrophin, basic 2 // // 8 D3/8 52.0 cM // 20650      | 10           | 6978937       | 0                           | 0                            | 0.736212                   | 0.098763                    | 0.893478                    | 0.199233                    | 0.994008                      | 0.870086                      | 6.65E-05                         | 0.00077731                       |
| 478 | NM 028760 // Cep55 // centrosomal protein 55 // // 19 C3 // 74107 // AH      | 15           | 6869537       | 1                           | 0                            | 0.640591                   | 0.093781                    | 0.325896                    | 0.0121216                   | 0.984253                      | 0.365543                      | 7.08E-05                         | 2.18E-06                         |
| 479 | NM 009835 // Ccr6 // chemokine (C-C motif) receptor 6 // // 17 A1 // 124     | 8            | 6848579       | 0                           | 0                            | 0.747691                   | 0.432068                    | 0.998862                    | 0.551862                    | 0.822956                      | 0.929759                      | 7.32E-05                         | 6.99E-09                         |
| 480 | NM 010386 // H2-DMa // histocompatibility 2, class II, locus Dma // // 17    | 6            | 6850012       | 0                           | 0                            | 0.666776                   | 0.457381                    | 0.204379                    | 0.642585                    | 0.943377                      | 0.996492                      | 7.74E-05                         | 0.00039491                       |
| 481 | NM 011518 // Syk // spleen tyrosine kinase // // 13 B-C2/13 37.0 cM // 2     | 15           | 6807074       | 3                           | 1                            | 0.0049219                  | 0.0247353                   | 0.000895                    | 0.662947                    | 0.380548                      | 0.774092                      | 7.85E-05                         | 1.44E-10                         |
| 482 | NM 011414 // Sipi // secretory leukocyte peptidase inhibitor // // 2056      | 6            | 6892899       | 1                           | 0                            | 0.86622                    | 0.0202567                   | 0.453147                    | 0.86827                     | 0.853233                      | 0.988079                      | 7.96E-05                         | 1.92E-10                         |
| 483 | XM 977785 // LOC699888 // similar to Lipoprotein lipase precursor (L         | 14           | 6976901       | 3                           | 0                            | 0.0032523                  | 0.0557605                   | 0.0033692                   | 0.0075727                   | 0.869599                      | 0.928744                      | 8.40E-05                         | 1.89E-06                         |
| 484 | XM 981611 // Adam23 // a disintegrin and metalloproteinase domain 2          | 26           | 6749933       | 2                           | 0                            | 0.0250118                  | 0.985523                    | 0.0393186                   | 0.0503323                   | 0.99764                       | 0.998415                      | 8.66E-05                         | 1.10E-34                         |
| 485 | NM 172685 // Stc25a24 // solute carrier family 25 (mitochondrial carri       | 17           | 6900450       | 1                           | 1                            | 0.199744                   | 0.0006812                   | 0.508393                    | 0.574731                    | 0.840579                      | 0.815513                      | 8.68E-05                         | 2.70E-08                         |
| 486 | NM 029249 // 4930547N16Rik // RIKEN cDNA 4930547N16.gene // // 17            | 6            | 6775830       | 0                           | 0                            | 0.798458                   | 0.164927                    | 0.268841                    | 0.825459                    | 0.999668                      | 0.997939                      | 9.12E-05                         | 7.68E-08                         |
| 487 | NM 172275 // Traf1 // TRAF type zinc finger domain containing 1 // // 14     | 10           | 6941672       | 0                           | 0                            | 0.0894617                  | 0.327974                    | 0.751153                    | 0.729899                    | 0.795244                      | 0.920885                      | 0.0001011                        | 7.61E-05                         |
| 488 | NM 197959 // 3000004C01Rik // RIKEN cDNA 3000004C01.gene // // 20            | 12           | 6791644       | 2                           | 0                            | 0.415363                   | 0.0083445                   | 0.519413                    | 0.0450868                   | 0.999986                      | 0.924537                      | 0.00010554                       | 1.18E-05                         |
| 489 | NM 177583 // Aph1b // anterior pharynx defective 1b homolog (C. eleg         | 5            | 6996432       | 1                           | 0                            | 0.0695363                  | 0.1462                      | 0.563677                    | 0.0023476                   | 0.531394                      | 0.985776                      | 0.00010727                       | 0.00056665                       |
| 490 | NM 008455 // Kikb1 // kallikrein B, plasma 1 // // 8 B1-B3/8 26.0 cM // 1    | 31           | 6982094       | 1                           | 1                            | 0.81805                    | 0.207767                    | 0.0505389                   | 3.84E-07                    | 0.999999                      | 0.993594                      | 0.00011278                       | 5.68E-05                         |
| 491 | NM 144559 // Fcgr3a // Fc fragment of IgG, low affinity IIIa, receptor //    | 5            | 6755146       | 0                           | 0                            | 0.196292                   | 0.498136                    | 0.31073                     | 0.29722                     | 0.764692                      | 0.404529                      | 0.00012216                       | 6.61E-07                         |
| 492 | NM 145977 // Stc45a3 // solute carrier family 45, member 3 // // 1 E4 //     | 10           | 6753089       | 2                           | 0                            | 0.623119                   | 0.0825699                   | 0.0211976                   | 0.0469023                   | 0.922266                      | 0.995932                      | 0.00012351                       | 8.85E-06                         |
| 493 | NM 019684 // Srp3 // serine/arginine-rich protein specific kinase 3 // //    | 16           | 7011952       | 3                           | 1                            | 0.044773                   | 0.0033752                   | 0.493261                    | 2.52E-05                    | 0.821314                      | 0.884109                      | 0.00012893                       | 1.91E-07                         |
| 494 | NM 001025600 // Igsf4a // immunoglobulin superfamily, member 4A // //        | 14           | 6988855       | 1                           | 0                            | 0.70864                    | 0.0240129                   | 0.817342                    | 0.381824                    | 0.981826                      | 0.792357                      | 0.0001298                        | 2.83E-24                         |
| 495 | NM 009656 // Aldh2 // aldehyde dehydrogenase 2, mitochondrial // // 5        | 15           | 6941685       | 2                           | 0                            | 0.0256237                  | 0.0324789                   | 0.50026                     | 0.973512                    | 0.977196                      | 0.721564                      | 0.00013265                       | 4.67E-10                         |
| 496 | NM 153507 // Cpne2 // copine 1 // // 8 C5 // 234577 // AK086165 // Cpr       | 15           | 6978319       | 2                           | 2                            | 0.799271                   | 3.94E-05                    | 0.770652                    | 0.0005096                   | 0.803709                      | 0.743465                      | 0.00013365                       | 9.27E-09                         |
| 497 | NM 025961 // Gatm // glycine amidinotransferase (L-arginine:glycine          | 12           | 6800448       | 2                           | 0                            | 0.0348725                  | 0.0042428                   | 0.517315                    | 0.131974                    | 0.949506                      | 0.99886                       | 0.00013449                       | 1.89E-12                         |
| 498 | NM 053166 // Trim7 // tripartite motif protein 7 // // 11 B1.2 // 94089 // A | 12           | 6780696       | 0                           | 0                            | 0.953687                   | 0.754727                    | 0.248718                    | 0.0930734                   | 0.840083                      | 0.970285                      | 0.0001346                        | 1.26E-09                         |
| 499 | NM 008042 // Fpr1 // formyl peptide receptor-like 1 // // 17 A3.2 // 1429    | 7            | 6848972       | 1                           | 0                            | 0.420767                   | 0.0136493                   | 0.966936                    | 0.578895                    | 0.445098                      | 0.977905                      | 0.00013775                       | 4.45E-06                         |
| 500 | NM 027373 // 2600003E23Rik // RIKEN cDNA 2600003E23.gene // // 19            | 9            | 6929920       | 1                           | 0                            | 0.203817                   | 0.955161                    | 0.780364                    | 0.0347079                   | 0.999008                      | 0.984544                      | 0.00013834                       | 0.00046046                       |
| 501 | NM 015790 // Icosl // icos ligand // // 10 C1 // 50723 // AK220220 // Icos   | 8            | 6769033       | 1                           | 0                            | 0.783187                   | 0.945607                    | 0.0173543                   | 0.846528                    | 0.974245                      | 0.956538                      | 0.00014402                       | 0.00059344                       |
| 502 | NM 008139 // Gnaq // guanine nucleotide binding protein, alpha q pol         | 10           | 6868356       | 0                           | 0                            | 0.562804                   | 0.814543                    | 0.357102                    | 0.465623                    | 0.997059                      | 0.998289                      | 0.00015029                       | 0.00030178                       |
| 503 | NM 009845 // Cd22 // CD22 antigen // // 7 B1/7 9.0 cM // 12483 // BC0        | 21           | 6963622       | 1                           | 0                            | 0.833415                   | 0.0013716                   | 0.11878                     | 0.209108                    | 0.998874                      | 0.999299                      | 0.00016118                       | 9.45E-11                         |
| 504 | NM 199311 // Clec4a1 // C-type lectin domain family 4, member a1 // //       | 10           | 6949722       | 0                           | 0                            | 0.564813                   | 0.492312                    | 0.820983                    | 0.305333                    | 0.991058                      | 0.98454                       | 0.00016497                       | 1.89E-09                         |
| 505 | NM 011939 // Hsf4 // heat shock transcription factor 4 // // 8 D1 // 2638    | 16           | 6978818       | 1                           | 0                            | 0.468584                   | 0.190171                    | 0.72541                     | 0.0106707                   | 0.969974                      | 0.792233                      | 0.00016701                       | 0.00015755                       |
| 506 | NM 009987 // Cx3cr1 // chemokine (C-X3-C) receptor 1 // // 9 F4 // 130       | 3            | 6999456       | 0                           | 0                            | 0.223936                   | 0.479113                    | 0.361826                    | 0.0887951                   | 0.657158                      | 0.468118                      | 0.00017175                       | 6.73E-05                         |
| 507 | NM 016920 // Atp6v0a1 // ATPase, H+ transporting, lysosomal V0 sub           | 24           | 6784236       | 1                           | 1                            | 0.214335                   | 0.282891                    | 0.341356                    | 0.0001139                   | 0.994003                      | 0.99697                       | 0.00017376                       | 3.63E-15                         |
| 508 | XM 980616 // LOC627016 // similar to hypothetical LOC432650 // // 7 A        | 8            | 6881556       | 0                           | 0                            | 0.411307                   | 0.852166                    | 0.231214                    | 0.0578273                   | 0.275888                      | 0.325099                      | 0.00018242                       | 4.93E-10                         |
| 509 | NM 134158 // Cd300d // Cd300D antigen // // 11 E2/11 78.0 cM // 1404         | 4            | 6792373       | 1                           | 0                            | 0.233296                   | 0.504399                    | 0.0042324                   | 0.632944                    | 0.312434                      | 0.926393                      | 0.00018304                       | 4.18E-08                         |
| 510 | NM 026496 // Grhl2 // grainyhead-like 2 (Drosophila) // // 15 C // 2529      | 19           | 6829871       | 3                           | 1                            | 0.0235652                  | 0.340328                    | 1.72E-05                    | 0.0183354                   | 0.683245                      | 0.97185                       | 0.00018413                       | 0.00073016                       |
| 511 | NM 177265 // 6330512M04Rik // RIKEN cDNA 6330512M04.gene // // 8             | 8            | 6972292       | 1                           | 0                            | 0.0447492                  | 0.571138                    | 0.726912                    | 0.999114                    | 0.962943                      | 0.355686                      | 0.00021625                       | 5.28E-05                         |
| 512 | NM 009013 // Rad51ap1 // RAD51 associated protein 1 // // 6 F3/6 61.3        | 9            | 6957252       | 2                           | 0                            | 0.725366                   | 0.008053                    | 0.273204                    | 0.0273938                   | 0.790816                      | 0.211087                      | 0.00022693                       | 2.73E-05                         |
| 513 | NM 033612 // Ela1 // elastase 1, pancreatic // // 15 56.8 cM // 109901 //    | 6            | 6838578       | 2                           | 0                            | 0.554698                   | 0.0372509                   | 0.0217409                   | 0.390247                    | 0.372703                      | 0.844716                      | 0.00022182                       | 6.73E-06                         |
| 514 | XM 001003209 // LOC676870 // region containing RIKEN cDNA 2310               | 14           | 6763937       | 3                           | 0                            | 0.27144                    | 0.0082374                   | 0.0256255                   | 0.0013859                   | 0.966405                      | 0.943905                      | 0.00022406                       | 1.61E-17                         |
| 515 | NM 011234 // Rad51 // RAD51 homolog (S. cerevisiae) // // 2 F1/2 66.8        | 11           | 6880497       | 0                           | 0                            | 0.478237                   | 0.253213                    | 0.984237                    | 0.67602                     | 0.993641                      | 0.85019                       | 0.00022479                       | 7.51E-05                         |
| 516 | XM 001004634 // LOC619653 // similar to Thymidine kinase, cytosolic          | 2            | 6792601       | 0                           | 0                            | 0.20195                    | 0.0012006                   | 0.262399                    | 0.6991                      | 0.936568                      | 0.281843                      | 0.00022656                       | 4.97E-05                         |
| 517 | NM 011708 // Vwf // Von Willebrand factor homolog // // 6 F3/6 60.8 cM       | 54           | 6949884       | 2                           | 0                            | 0.100154                   | 0.149633                    | 0.0284077                   | 0.0191844                   | 0.420754                      | 0.999988                      | 0.00022918                       | 0.00081454                       |
| 518 | NM 013482 // Btk // Bruton agammaglobulinemia tyrosine kinase // // X        | 19           | 7019518       | 0                           | 0                            | 0.538816                   | 0.256349                    | 0.0568227                   | 0.784467                    | 0.990584                      | 0.937366                      | 0.00023078                       | 7.31E-13                         |
| 519 | NM 177372 // Dna2 // DNA2 DNA replication helicase 2-like (yeast) // //      | 23           | 6768324       | 1                           | 0                            | 0.468117                   | 0.0016895                   | 0.261996                    | 0.0758415                   | 0.997271                      | 0.999206                      | 0.00023311                       | 1.49E-15                         |
| 520 | NM 007932 // Eng // endoglin // // 2 B/2 21.4 cM // 13805 // AY679531 //     | 25           | 6876212       | 1                           | 1                            | 0.113364                   | 0.315121                    | 0.000101                    | 0.0636827                   | 0.545941                      | 0.999743                      | 0.0002503                        | 5.55E-05                         |
| 521 | NM 011391 // Slc16a7 // solute carrier family 16 (monocarboxylic acid        | 10           | 6777784       | 0                           | 0                            | 0.154385                   | 0.695857                    | 0.193079                    | 0.99418                     | 0.756895                      | 0.807275                      | 0.00025542                       | 0.00061277                       |
| 522 | NM 133994 // Gst3 // glutathione S-transferase, theta 3 // // 10 C1 //       | 10           | 6775149       | 0                           | 0                            | 0.994489                   | 0.728542                    | 0.90351                     | 0.143191                    | 0.994541                      | 0.990994                      | 0.00025888                       | 1.27E-05                         |
| 523 | NM 007387 // Acp2 // acid phosphatase 2, lysosomal // // 2 E1/2 52.0 cM      | 13           | 6879034       | 6                           | 5                            | 3.85E-09                   | 1.15E-07                    | 7.44E-10                    | 9.66E-08                    | 0.0376135                     | 1.39E-07                      | 0.0002602                        | 1.41E-08                         |
| 524 | NM 021891 // Fign1 // fidgetin-like 1 // // 11 A2 // 60530 // AK051324 //    | 16           | 6786044       | 1                           | 1                            | 0.576082                   | 0.006085                    | 0.100886                    | 0.0548241                   | 0.956942                      | 0.77509                       | 0.00026688                       | 2.36E-07                         |
| 525 | NM 026674 // Aph1c // anterior pharynx defective 1c homolog (C. eleg         | 6            | 6996438       | 0                           | 0                            | 0.531774                   | 0.0912421                   | 0.183166                    | 0.6286                      | 0.496588                      | 0.721747                      | 0.00027678                       | 2.15E-08                         |
| 526 | NM 010548 // Il10 // interleukin 10 // // 1 E4/1 69.9 cM // 16153            | 7            | 6753014       | 0                           | 0                            | 0.373026                   | 0.336134                    | 0.179373                    | 0.898168                    | 0.997772                      | 0.94277                       | 0.00027797                       | 3.90E-05                         |
| 527 | NM 177337 // Arl1 // ADP-ribosylation factor-like 1 // // 14 D1 // 21914     | 3            | 6819602       | 1                           | 0                            | 0.873853                   | 0.177071                    | 0.695282                    | 0.0210339                   | 0.352515                      | 0.585364                      | 0.00029092                       | 7.30E-06                         |
| 528 | NM 008832 // Phka1 // phosphorylase kinase alpha 1 // // X DIX 39.0 cM       | 36           | 7018594       | 2                           | 0                            | 0.201595                   | 0.0011016                   | 0.0956987                   | 0.0645977                   | 0.999923                      | 0.0066226                     | 0.00031886                       | 1.14E-07                         |
| 529 | NM 001037134 // Ccne2 // cyclin E2 // // 4 A2 // 12448 // NM 009830 //       | 9            | 6911682       | 1                           | 0                            | 0.46178                    | 0.918267</                  |                             |                             |                               |                               |                                  |                                  |



|     | A                                                                         | B            | C             | D                           | E                            | F                    | G                     | H                            | I                        | J                           | K                       | L                                | M                                |
|-----|---------------------------------------------------------------------------|--------------|---------------|-----------------------------|------------------------------|----------------------|-----------------------|------------------------------|--------------------------|-----------------------------|-------------------------|----------------------------------|----------------------------------|
| 1   | Gene Description                                                          | # Probe Sets | Transcript ID | Number of cell types p<0.05 | Number of cell types p<0.001 | p value wt v thu CD4 | P value wt vs thu CD4 | p value wt vs thu memory CD8 | p value naïve vs thu CD8 | p value thymus vs thu CD8SP | p value wt vs thu CD4SP | P-value WT naïve v WT memory CD4 | P-value WT naïve v WT memory CD8 |
| 538 | NM_153064 // Ndufs2 // NADH dehydrogenase (ubiquinone) Fe-S pro           | 4            | 6764049       | 0                           | 0                            | 0.757949             | 0.354186              | 0.932581                     | 0.204064                 | 0.646811                    | 0.601837                | 0.00037471                       | 0.00011527                       |
| 539 | NM_178754 // Arhgap6 // Rho GTPase activating protein 6 // X F5 // 1      | 18           | 7015229       | 1                           | 0                            | 0.341618             | 0.621834              | 0.323609                     | 0.0494075                | 0.96997                     | 0.990426                | 0.00038378                       | 6.33E-06                         |
| 540 | NM_178874 // Tmcc2 // transmembrane and coiled-coil domains 2 // 1        | 6            | 6762217       | 0                           | 0                            | 0.127507             | 0.823332              | 0.700058                     | 0.924161                 | 0.854782                    | 0.265062                | 0.00040808                       | 3.43E-05                         |
| 541 | NM_023158 // Cxcl16 // chemokine (C-X-C motif) ligand 16 // 11 B4 // 6    | 6            | 6789420       | 0                           | 0                            | 0.950947             | 0.150035              | 0.728927                     | 0.515511                 | 0.727966                    | 0.738273                | 0.0004214                        | 4.56E-06                         |
| 542 | NM_010593 // Jup // junction plakoglobin // 11 D11 60.0 cM // 16480 // 12 | 12           | 6791422       | 1                           | 0                            | 0.216358             | 0.0801969             | 0.878712                     | 0.0404457                | 0.927219                    | 0.918859                | 0.00042317                       | 8.25E-07                         |
| 543 | NM_198654 // 4833432M17Rik // RIKEN cDNA 4833432M17 gene // 16            | 16           | 6756346       | 2                           | 0                            | 0.909929             | 0.0336781             | 0.0010501                    | 0.287657                 | 0.93297                     | 0.88654                 | 0.000483                         | 8.47E-15                         |
| 544 | NM_146187 // Ffar2 // free fatty acid receptor 2 // 7 B1 // 233079 // B05 | 5            | 6966314       | 0                           | 0                            | 0.970152             | 0.981181              | 0.398396                     | 0.713079                 | 0.335621                    | 0.898866                | 0.00048543                       | 1.33E-05                         |
| 545 | NM_024264 // Cyp27a1 // cytochrome P450, family 27, subfamily a, p1       | 11           | 6750566       | 1                           | 1                            | 0.854773             | 0.5702                | 0.0058586                    | 0.442757                 | 0.911931                    | 0.965107                | 0.00050182                       | 1.10E-17                         |
| 546 | NM_019449 // Unc93b1 // unc-93 homolog B1 (C. elegans) // 19 A // 5       | 14           | 6867615       | 1                           | 0                            | 0.13364              | 0.0073591             | 0.0967954                    | 0.0574702                | 0.99998                     | 0.870608                | 0.00050446                       | 3.00E-09                         |
| 547 | NM_008591 // Met // met proto-oncogene // 6 4.0 cM // 17295 // AK14       | 22           | 6944380       | 0                           | 0                            | 0.690191             | 0.757646              | 0.607941                     | 0.474336                 | 0.832179                    | 0.729255                | 0.00054149                       | 7.07E-17                         |
| 548 | NM_010648 // Kir3 // killer cell lectin-like receptor, subfamily A, mem3  | 3            | 6957444       | 0                           | 0                            | 0.769797             | 0.588959              | 0.702929                     | 0.461799                 | 0.964178                    | 0.632023                | 0.00054947                       | 2.24E-08                         |
| 549 | NM_001024911 // Sept10 // septin 10 // 10 B4 // 103080 // NM_00102        | 11           | 6774226       | 1                           | 0                            | 0.358006             | 0.0167831             | 0.990493                     | 0.118363                 | 0.30068                     | 0.261968                | 0.0005516                        | 3.18E-13                         |
| 550 | NM_009502 // Vcl // vinculin // 14 A3 14 2.5 cM // 22330                  | 24           | 6817393       | 2                           | 0                            | 0.0256703            | 0.305338              | 0.128232                     | 0.0016929                | 0.134994                    | 0.929374                | 0.00063852                       | 9.13E-09                         |
| 551 | NM_145924 // Cenpi // centromere protein 1 // X E3 // 102920 // XM        | 9            | 7013857       | 1                           | 0                            | 0.395561             | 0.031666              | 0.841178                     | 0.457511                 | 0.999711                    | 0.999115                | 0.00067337                       | 5.69E-05                         |
| 552 | NM_008506 // Myc1 // v-myc myelocytomatosis viral oncogene homo           | 12           | 6916937       | 2                           | 0                            | 0.956846             | 0.805635              | 0.0187937                    | 0.008379                 | 0.752859                    | 0.973643                | 0.00068286                       | 3.02E-24                         |
| 553 | XM_981541 // 1300007C21Rik // RIKEN cDNA 1300007C21 gene // 1             | 9            | 6934119       | 0                           | 0                            | 0.736219             | 0.865954              | 0.28325                      | 0.739864                 | 0.875033                    | 0.971187                | 0.00069475                       | 6.41E-05                         |
| 554 | NM_025972 // Asah1 // N-acylsphingosine amidohydrolase (acid ceram        | 11           | 6939985       | 0                           | 0                            | 0.682735             | 0.0642156             | 0.521141                     | 0.139769                 | 0.904914                    | 0.938742                | 0.00069509                       | 3.06E-25                         |
| 555 | NM_024223 // Crip2 // cysteine rich protein 2 // 12 F1 12 58.7 cM // 68   | 6            | 6798313       | 1                           | 0                            | 0.860248             | 0.0868601             | 0.0031589                    | 0.185133                 | 0.970575                    | 0.716477                | 0.00072313                       | 6.17E-10                         |
| 556 | NM_019789 // Kcnip3 // Kv channel interacting protein 3, calsenilin // 2  | 9            | 6890699       | 0                           | 0                            | 0.186933             | 0.424203              | 0.230074                     | 0.547423                 | 0.998798                    | 0.844222                | 0.0007262                        | 0.00025613                       |
| 557 | NM_007760 // Crat // carnitine acetyltransferase // 2 B 2 18.0 cM // 12   | 16           | 6885773       | 0                           | 0                            | 0.153762             | 0.606504              | 0.559425                     | 0.0935806                | 0.344584                    | 0.833409                | 0.00074197                       | 1.27E-05                         |
| 558 | NM_011864 // Paps2 // 3'-phosphoadenosine 5'-phosphosulfate synt          | 14           | 6869216       | 1                           | 0                            | 0.0903236            | 0.0905387             | 0.284273                     | 0.0255193                | 0.949306                    | 0.76146                 | 0.00076516                       | 1.27E-08                         |
| 559 | NR_000040 // Tyms-ps // thymidylate synthase, pseudogene // 10 C1         | 7            | 6936981       | 0                           | 0                            | 0.607764             | 0.414765              | 0.0910457                    | 0.0715244                | 0.947491                    | 0.996669                | 0.00077478                       | 6.34E-06                         |
| 560 | NM_008013 // Fgl2 // fibrinogen-like protein 2 // 5 A3 5 7.0 cM // 1419   | 6            | 6929119       | 1                           | 0                            | 0.587548             | 0.745796              | 0.464714                     | 0.476527                 | 0.292423                    | 0.0477766               | 0.00081438                       | 4.24E-08                         |
| 561 | NM_026393 // NmrA1 // NmrA-like family domain containing 1 // 16 A        | 5            | 6843657       | 0                           | 0                            | 0.644763             | 0.510342              | 0.270696                     | 0.254476                 | 0.711811                    | 0.99816                 | 0.0008835                        | 0.00082524                       |
| 562 | NM_173402 // Rgs12 // regulator of G-protein signaling 12 // 5 B2 5 20    | 23           | 6929861       | 0                           | 0                            | 0.225728             | 0.662213              | 0.771332                     | 0.257695                 | 0.953072                    | 0.976471                | 0.00092946                       | 5.48E-06                         |
| 563 | NM_009373 // Tgm2 // transglutaminase 2, C polypeptide // 2 H1 2 89       | 13           | 6892579       | 0                           | 0                            | 0.31819              | 0.601128              | 0.485142                     | 0.0739961                | 0.444746                    | 0.94598                 | 0.00096774                       | 3.46E-08                         |
| 564 | NM_001001495 // 9030611K07Rik // RIKEN cDNA 9030611K07 gene // 9          | 9            | 6946749       | 0                           | 0                            | 0.547265             | 0.354569              | 0.138902                     | 0.0524454                | 0.520444                    | 0.967385                | 0.0009678                        | 8.59E-05                         |
| 565 | NM_028810 // Rnd3 // Rho family GTPase 3 // 2 C1.1 // 74194 // AK0        | 9            | 6886678       | 0                           | 0                            | 0.56303              | 0.675675              | 0.89519                      | 0.230754                 | 0.69797                     | 0.29959                 | 0.00099338                       | 0.000869                         |
| 566 | NM_019453 // Mefv // Mediterranean fever // 16 A1 16 1.1 cM // 5448       | 15           | 6843601       | 2                           | 2                            | 0.743833             | 0.699137              | 0.0001704                    | 0.0003659                | 0.999884                    | 0.680035                | 0.00099938                       | 1.29E-09                         |

Wu Supp Table 8: Highest ranked wt memory vs naive cells Page 9
